# Supplementary material for: Long-term historical trends in air pollutant emissions in Asia: Regional Emission inventory in ASia (REAS) version 3
Source: Copernicus journal article supplement (doi:10.5194/acp-20-12761-2020), 2020-11-04
Supplement: Supplementary file 1 [file acp-20-12761-2020-supplement.zip]

Archive with 7 entries (6 files):
- acp-20-12761-2020-supplement-title-page.pdf
- Kurokawa_and_Ohara_Supplement/
- Kurokawa_and_Ohara_Supplement/Kurokawa_and_Ohara_Supplement_Figures.pdf
- Kurokawa_and_Ohara_Supplement/Kurokawa_and_Ohara_Supplement_Title_Page.pdf
- Kurokawa_and_Ohara_Supplement/Kurokawa_and_Ohara_Supplement_Tables.pdf
- Kurokawa_and_Ohara_Supplement/Kurokawa_and_Ohara_Supplement_Methodology.pdf
- Kurokawa_and_Ohara_Supplement/Kurokawa_and_Ohara_Supplement_REASv3.2vsREASv3.1.pdf
