# Supplementary material for: Long-term historical trends in air pollutant emissions in Asia: Regional Emission inventory in ASia (REAS) version 3
Source: Copernicus journal article supplement (doi:10.5194/acp-20-12761-2020), 2020-11-04
Supplement: Supplementary file 1 [file acp-20-12761-2020-supplement.zip › acp-20-12761-2020-supplement-title-page.pdf]

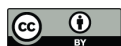

## *Supplement of*

# **Long-term historical trends in air pollutant emissions in Asia: Regional Emission inventory in ASia (REAS) version 3**

**Junichi Kurokawa and Toshimasa Ohara**

*Correspondence to:* Junichi Kurokawa (kurokawa@acap.asia)

- acp-20-12761-2020-supplement-title-page.pdf
- Kurokawa\_and\_Ohara\_Supplement
  - Kurokawa\_and\_Ohara\_Supplement\_Figures.pdf
  - Kurokawa\_and\_Ohara\_Supplement\_Methodology.pdf
  - Kurokawa\_and\_Ohara\_Supplement\_REASv3.2vsREASv3.1.pdf
  - Kurokawa\_and\_Ohara\_Supplement\_Tables.pdf
  - Kurokawa\_and\_Ohara\_Supplement\_Title\_Page.pdf

The copyright of individual parts of the supplement might differ from the CC BY 4.0 License.
