# Supplementary material for: Long-term historical trends in air pollutant emissions in Asia: Regional Emission inventory in ASia (REAS) version 3
Source: Copernicus journal article supplement (doi:10.5194/acp-20-12761-2020), 2020-11-04
Supplement: Supplementary file 1 [file acp-20-12761-2020-supplement.zip › Kurokawa_and_Ohara_Supplement/Kurokawa_and_Ohara_Supplement_Figures.pdf]

# Long-term historical trends in air pollutant emissions in Asia: Regional Emission inventory in ASia (REAS) version 3

**Junichi Kurokawa and Toshimasa Ohara**

5 *Correspondence to:* Junichi Kurokawa (kurokawa@acap.asia)

## Supplementary figures

**Figures S1, S3, S5, S7, S9, and S11** show emissions of (a) SO<sub>2</sub>, (b) NO<sub>x</sub>, (c) CO, (d) CO<sub>2</sub>, (e) PM<sub>10</sub>, (f) PM<sub>2.5</sub>, (g) BC, (h) OC, (i) NMVOC, and (j) NH<sub>3</sub> from major sectors during 1950-2015 in China, India, Japan, Southeast Asia (SEA), East Asia other than China and Japan (OEA), and South Asia other than India (OSA), respectively. See Fig. 1 for the definitions of SEA, OEA, and OSA. (Sectors for (a)-(h): PP = Power plants, IND = Industry, ROAD = Road transport, OTRA = Other transport, RESI = Residential, and ODOM = Other domestic; Sectors for (i): CMB = Combustion, ROAD = Road transport (including both tail pipe and evaporative emissions), INDPRC = Industrial processes, EXT = Extraction processes, PAINT = Paint use, SLV = Solvent use, and WST = Waste treatment; Sectors for (j): CMB = Combustion, MM = Manure management, FER = Fertilizer application, HUMAN = Human perspiration and respiration, LTRN = Latrines, and INDPRC = Industrial processes.)

**Figures S2, S4, S6, S8, S10, and S12** provide emissions of (a) SO<sub>2</sub>, (b) NO<sub>x</sub>, (c) CO, (d) CO<sub>2</sub>, (e) PM<sub>10</sub>, (f) PM<sub>2.5</sub>, (g) BC, (h) OC, (i) NMVOC, and (j) NH<sub>3</sub> from each fuel type during 1950-2015 in China, India, Japan, SEA, OEA, and OSA, respectively. See Fig. 1 for the definitions of SEA, OEA, and OSA. Note that emissions from non-combustion sources are not included in (i) NMVOC and (j) NH<sub>3</sub> to show contributions from fuel types clearly because majority of their emissions are from non-combustion sources. (Fuel types: COAL = Primary coal, DC = Secondary coal, NGAS = Natural gas, OGAS = Other gas fuels, LF = Light oil fuels, MD = Diesel oil, HF = Heavy oil fuels, BF = Biofuels, OTH = Other fuels, NCMB = Non-combustion sources, and CEMK = combustion emissions from cement kilns (only for Japan). Notes: For CO emissions from pig iron, crude steel, and sinter production for all countries, those from brick production except for China, Japan, Republic of Korea, and Taiwan, emissions of PM species from sinter and pig iron production for China, and those from brick production for all countries and regions estimated based on their production amounts, both combustion and non-combustion emissions are included in NCMB here. In Japan, emissions from cement production were estimated not by fuel consumption, but based on production amounts of cement in each kiln type. Therefore, contributions from total emissions from cement kiln combustion are included in CEMK.)

30 **Figure S13** illustrates grid maps of annual emissions of CO<sub>2</sub> and PM<sub>10</sub> in 1965 and 2015.

**Figures S14 and S15** compare CO, NMVOC, NH<sub>3</sub>, PM<sub>10</sub>, PM<sub>2.5</sub>, and OC emissions in REASv3 with other published estimates for China and India, respectively. Note that IM means estimates by inverse modeling and [A][B][C] of Jiang et al. (2017) are estimates based on A: MOPITT Column, B: MOPITT Profile, and C: MOPITT Lower Profile, respectively.

35 **Figures S16-S19** compare emissions of SO<sub>2</sub>, NO<sub>x</sub>, BC, CO, NMVOC, NH<sub>3</sub>, PM<sub>10</sub>, PM<sub>2.5</sub>, and OC in REASv3 with other published estimates for Japan, SEA, OEA, and OSA, respectively. See Fig. 1 for the definitions of SEA, OEA, and OSA. Note that IM means estimates by inverse modeling and [A][B][C] of Jiang et al. (2017) are estimates based on A: MOPITT Column, B: MOPITT Profile, and C: MOPITT Lower Profile, respectively.

40 **Figures S20** compares Asia total emissions and relative ratios of those from China, India, Japan, SEA, OEA, and OSA for CO, NMVOC, NH<sub>3</sub>, PM<sub>10</sub>, PM<sub>2.5</sub>, and OC among REASv3, CEDS, and EDGARv4.3.2. See Fig. 1 for definitions of SEA, OEA, and OSA.

## China Sector

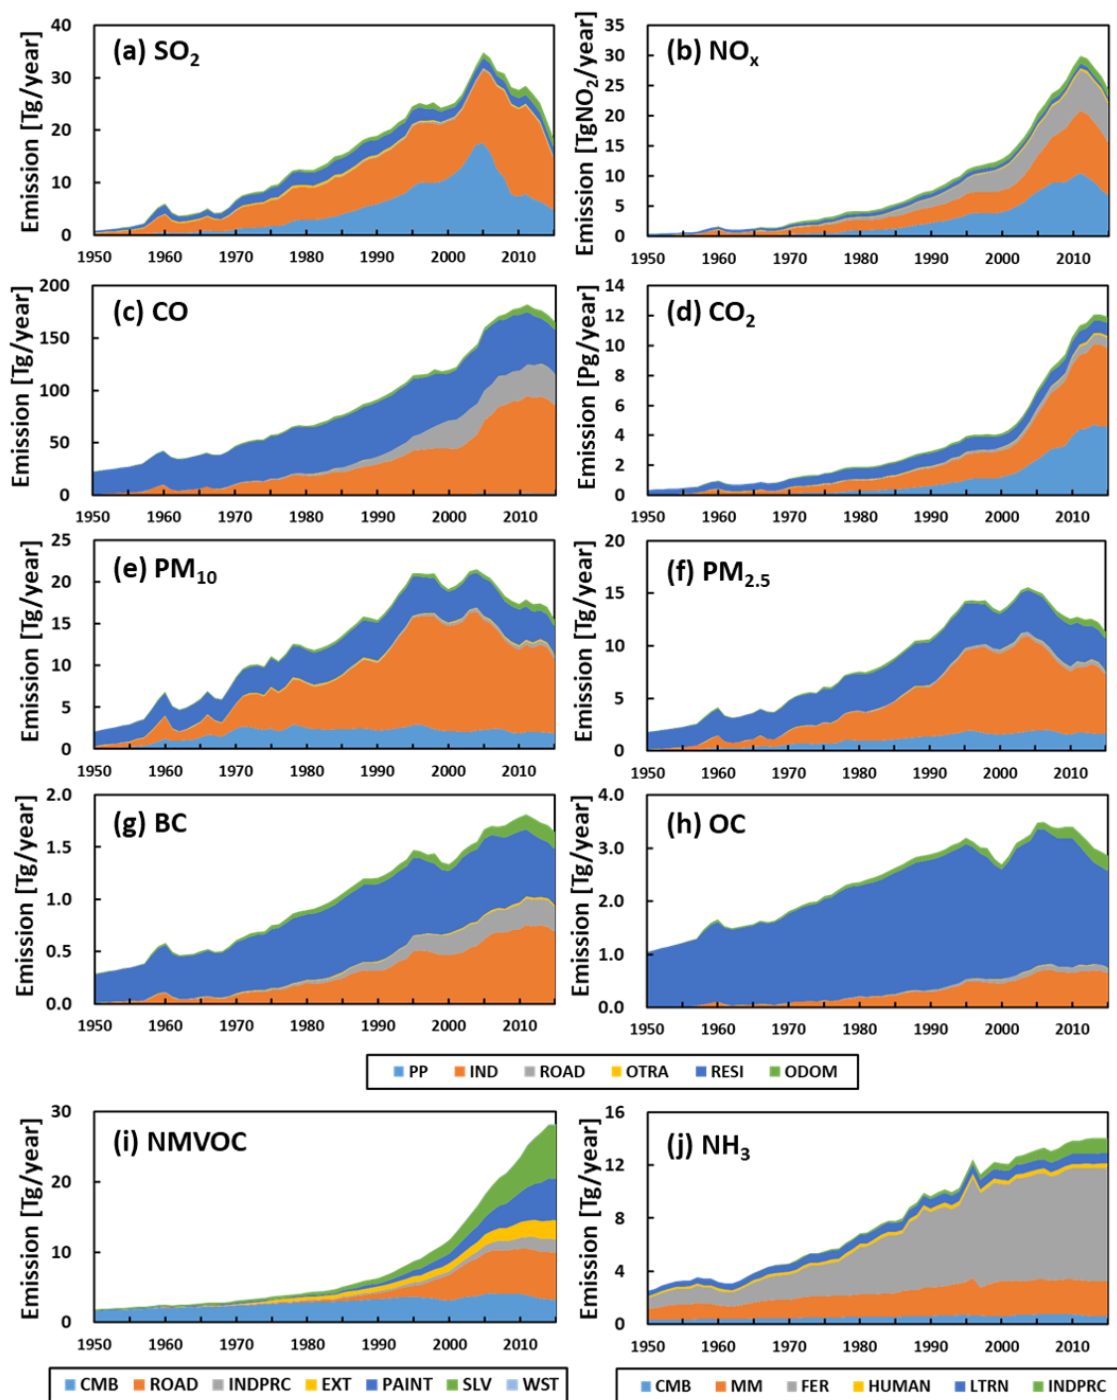

**Figure S1.** Emissions of (a)  $\text{SO}_2$ , (b)  $\text{NO}_x$ , (c) CO, (d)  $\text{CO}_2$ , (e)  $\text{PM}_{10}$ , (f)  $\text{PM}_{2.5}$ , (g) BC, (h) OC, (i) NMVOC, and (j)  $\text{NH}_3$  from major sectors in China from 1950 to 2015.

## China Fuel

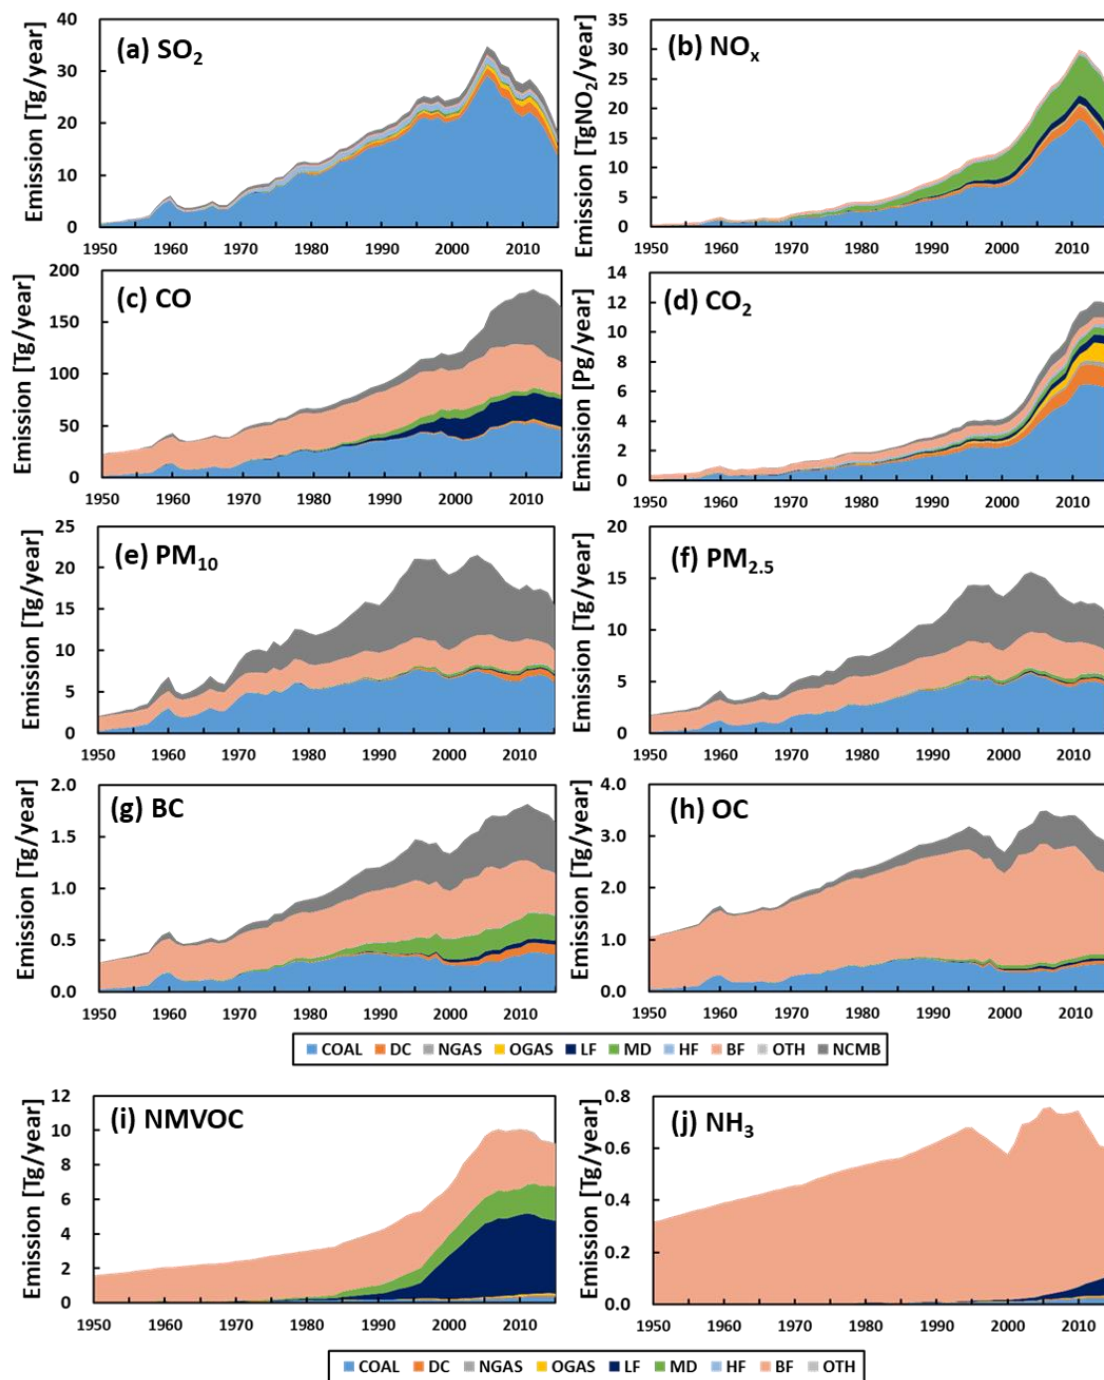

**Figure S2.** Emissions of (a) SO<sub>2</sub>, (b) NO<sub>x</sub>, (c) CO, (d) CO<sub>2</sub>, (e) PM<sub>10</sub>, (f) PM<sub>2.5</sub>, (g) BC, (h) OC, (i) NMVOC, and (j) NH<sub>3</sub> from each fuel type in China from 1950 to 2015.

## India Sector

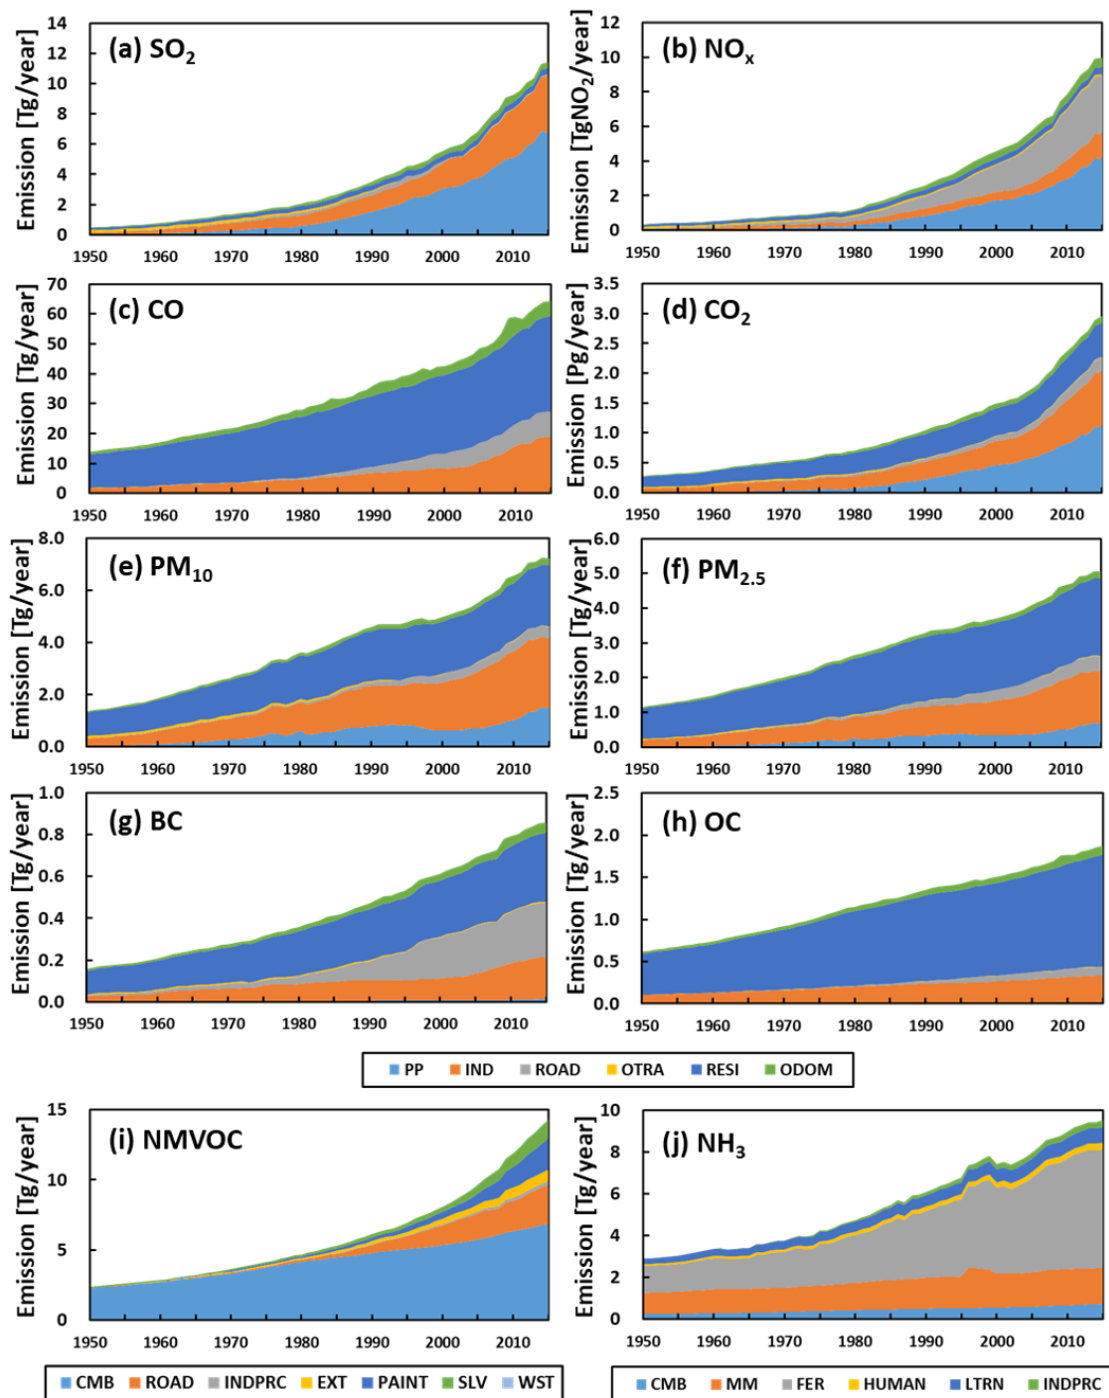

**Figure S3.** Emissions of (a) SO<sub>2</sub>, (b) NO<sub>x</sub>, (c) CO, (d) CO<sub>2</sub>, (e) PM<sub>10</sub>, (f) PM<sub>2.5</sub>, (g) BC, (h) OC, (i) NMVOC, and (j) NH<sub>3</sub> from major sectors in India from 1950 to 2015.

## India Fuel

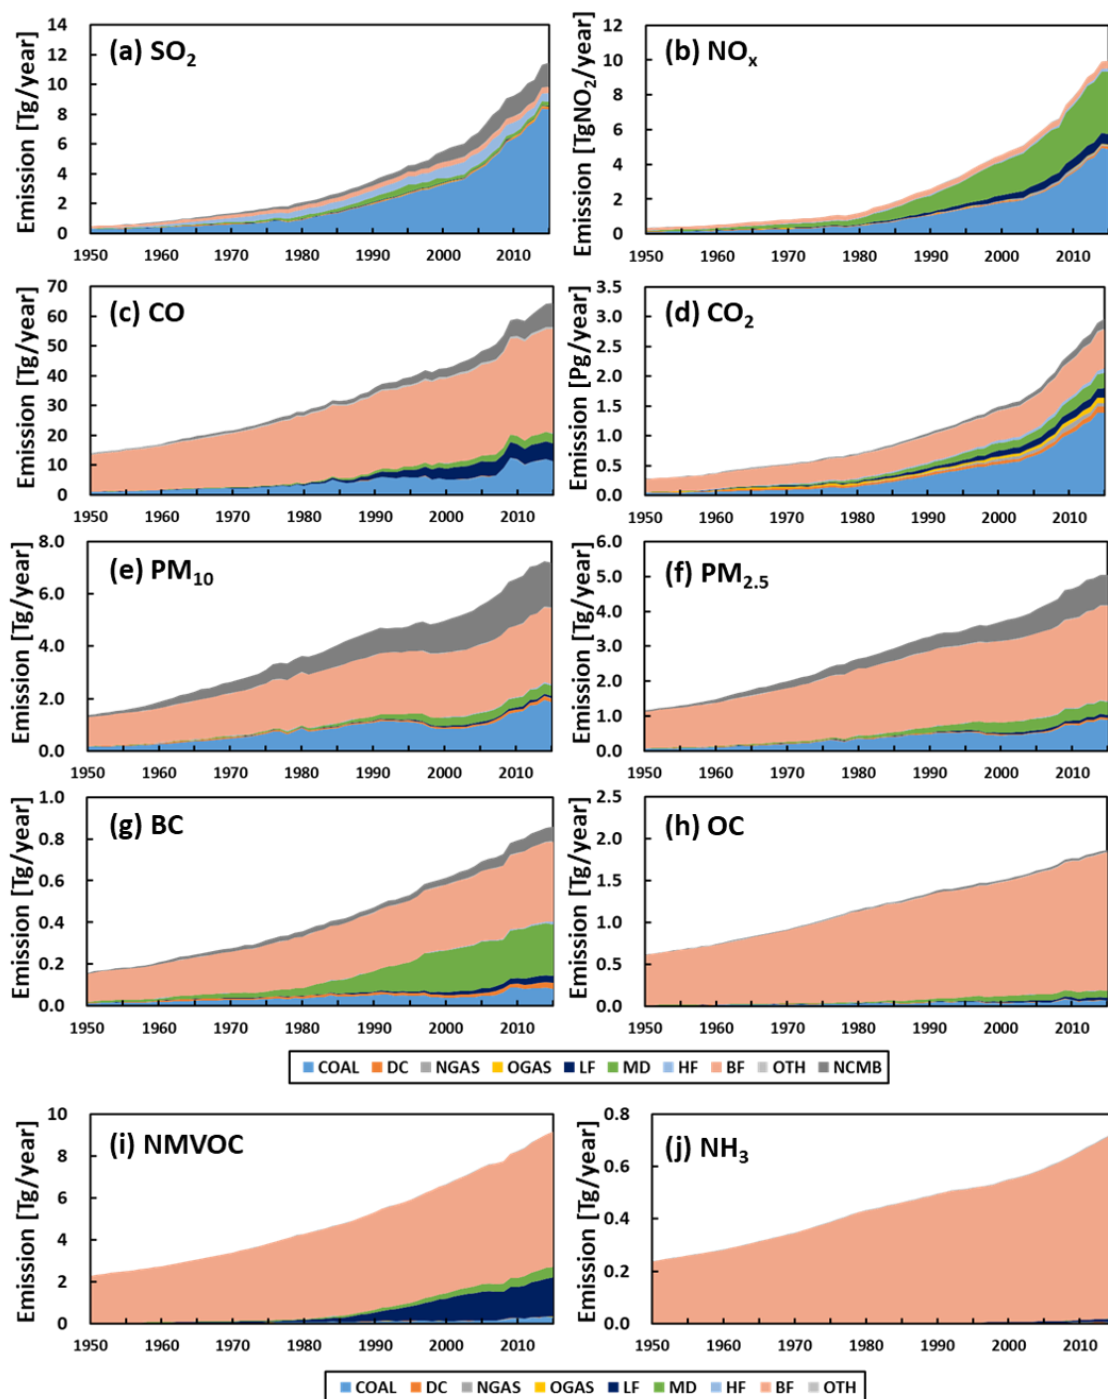

**Figure S4.** Emissions of (a)  $\text{SO}_2$ , (b)  $\text{NO}_x$ , (c) CO, (d)  $\text{CO}_2$ , (e)  $\text{PM}_{10}$ , (f)  $\text{PM}_{2.5}$ , (g) BC, (h) OC, (i) NMVOC, and (j)  $\text{NH}_3$  from each fuel type in India from 1950 to 2015.

## Japan Sector

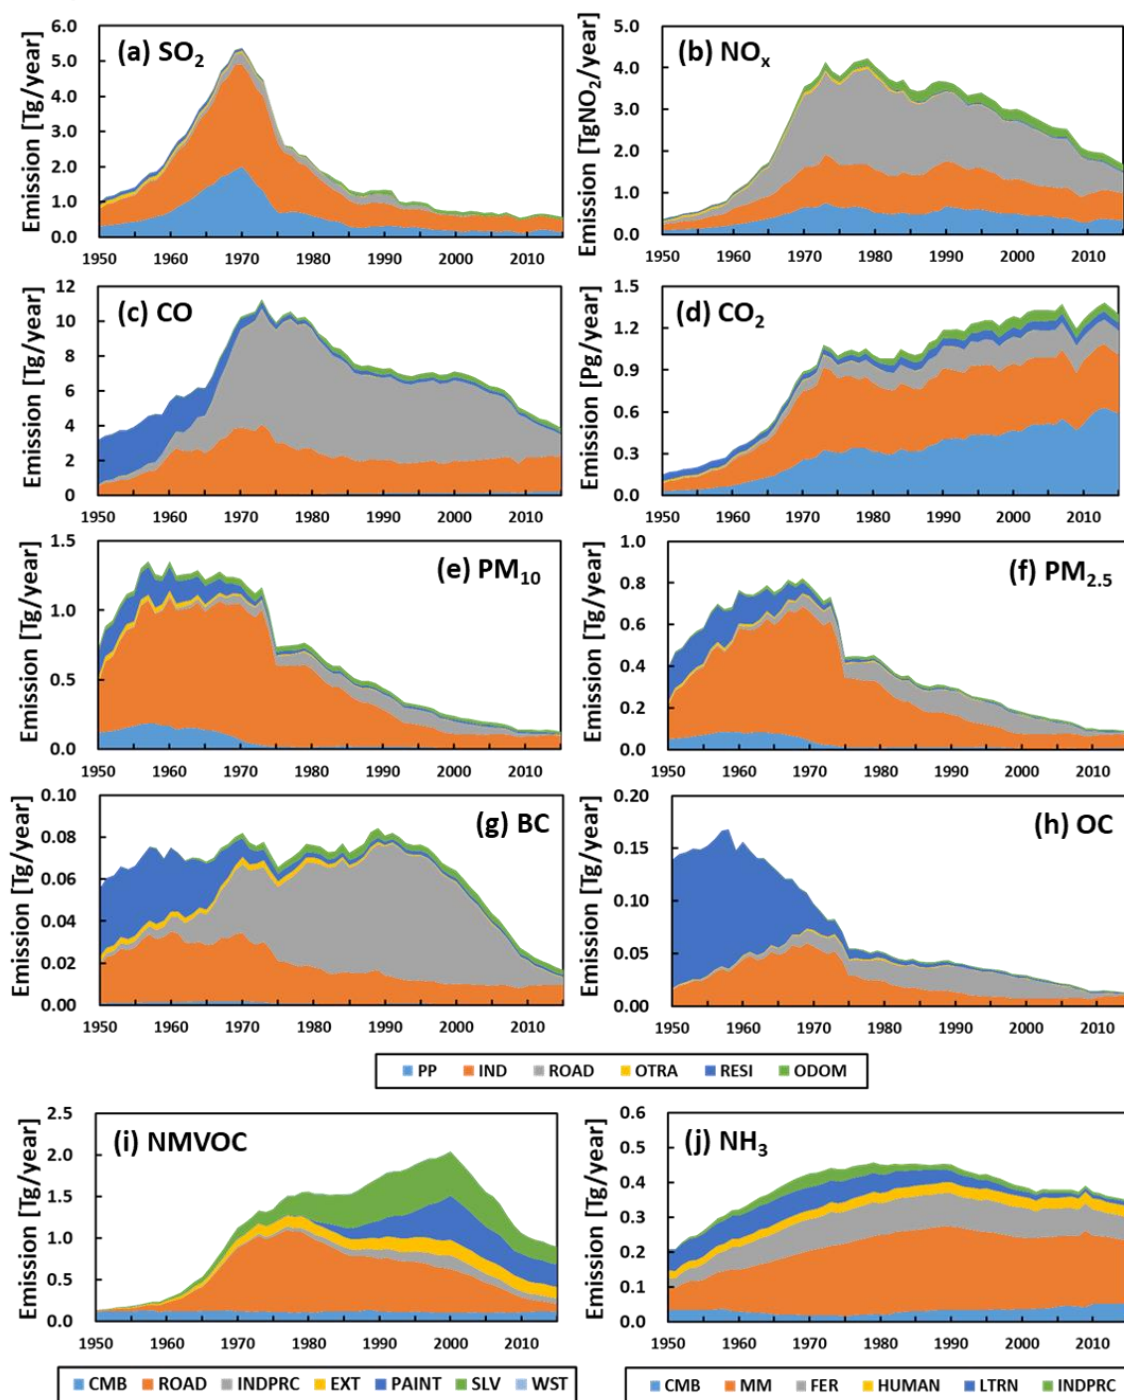

55 **Figure S5.** Emissions of (a)  $\text{SO}_2$ , (b)  $\text{NO}_x$ , (c) CO, (d)  $\text{CO}_2$ , (e)  $\text{PM}_{10}$ , (f)  $\text{PM}_{2.5}$ , (g) BC, (h) OC, (i) NMVOC, and (j)  $\text{NH}_3$  from major sectors in Japan from 1950 to 2015.

## Japan Fuel

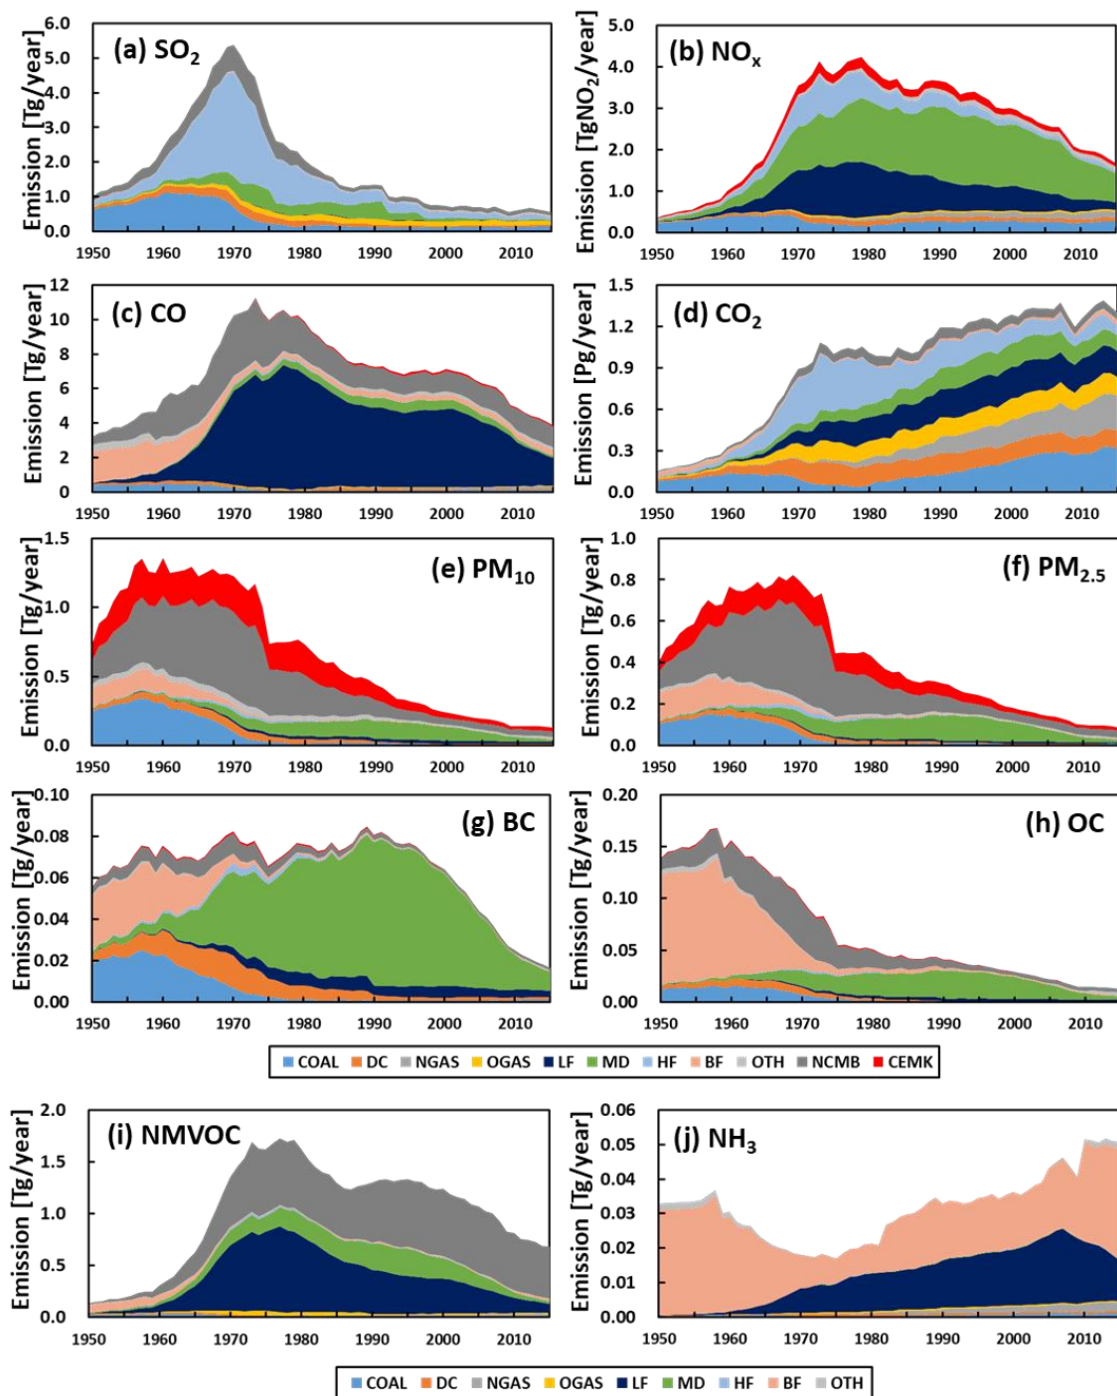

**Figure S6.** Emissions of (a)  $\text{SO}_2$ , (b)  $\text{NO}_x$ , (c) CO, (d)  $\text{CO}_2$ , (e)  $\text{PM}_{10}$ , (f)  $\text{PM}_{2.5}$ , (g) BC, (h) OC, (i) NMVOC, and (j)  $\text{NH}_3$  from each fuel type in Japan from 1950 to 2015.

## SEA Sector

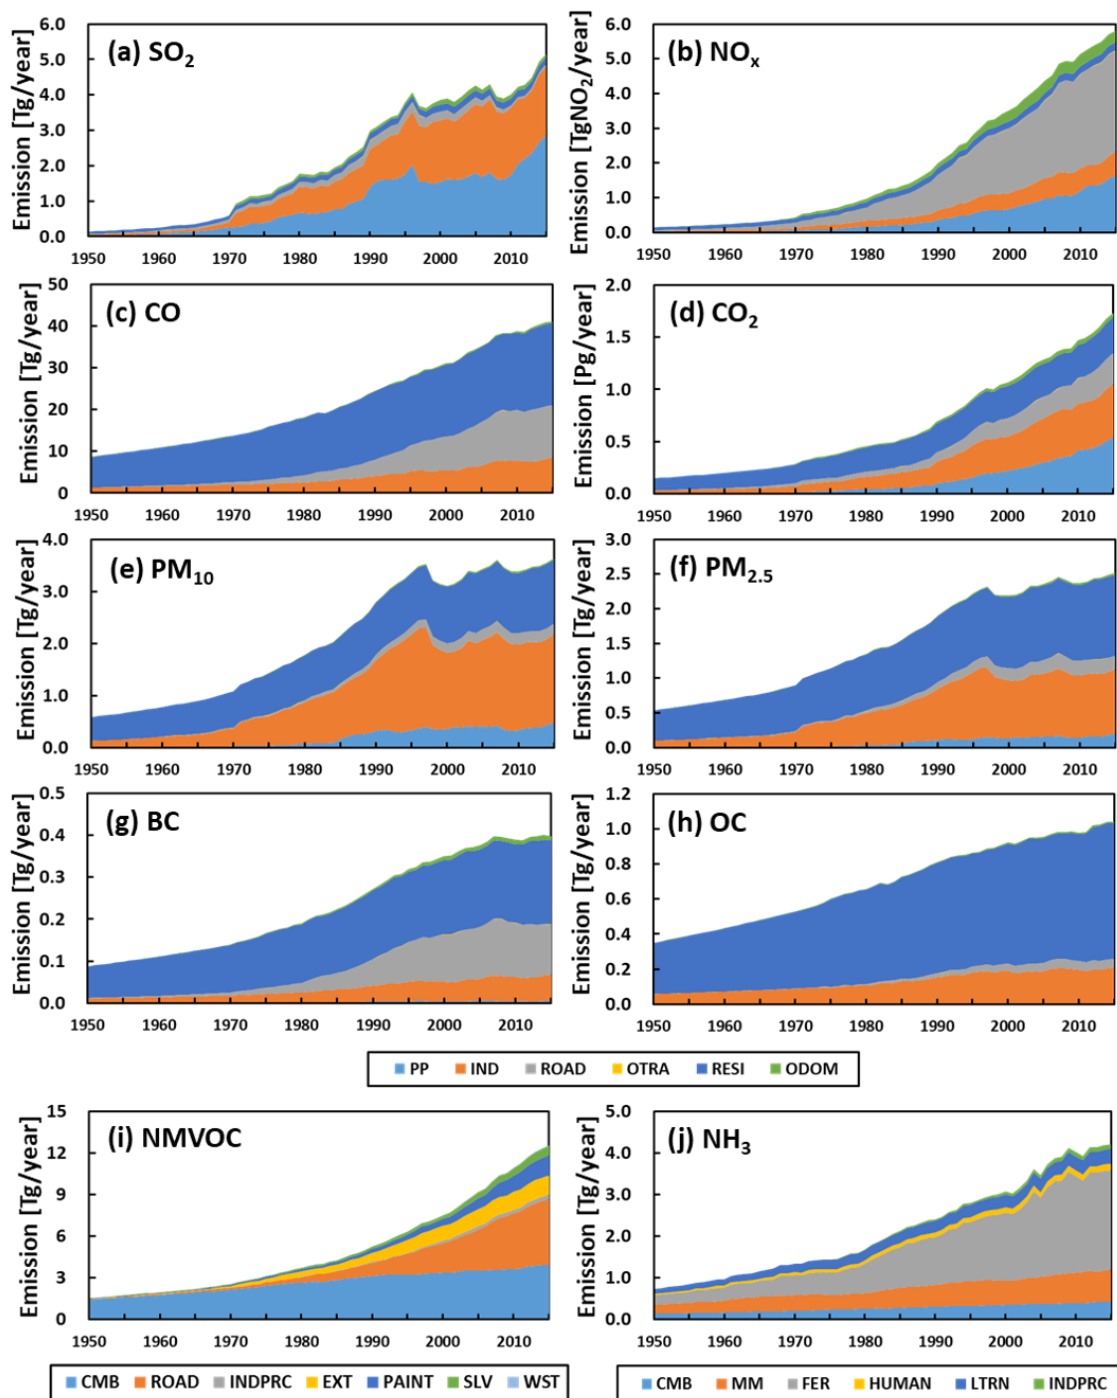

**Figure S7.** Emissions of (a)  $\text{SO}_2$ , (b)  $\text{NO}_x$ , (c) CO, (d)  $\text{CO}_2$ , (e)  $\text{PM}_{10}$ , (f)  $\text{PM}_{2.5}$ , (g) BC, (h) OC, (i) NMVOC, and (j)  $\text{NH}_3$  from major sectors in SEA from 1950 to 2015. See Fig. 1 for the definitions of SEA.

## SEA Fuel

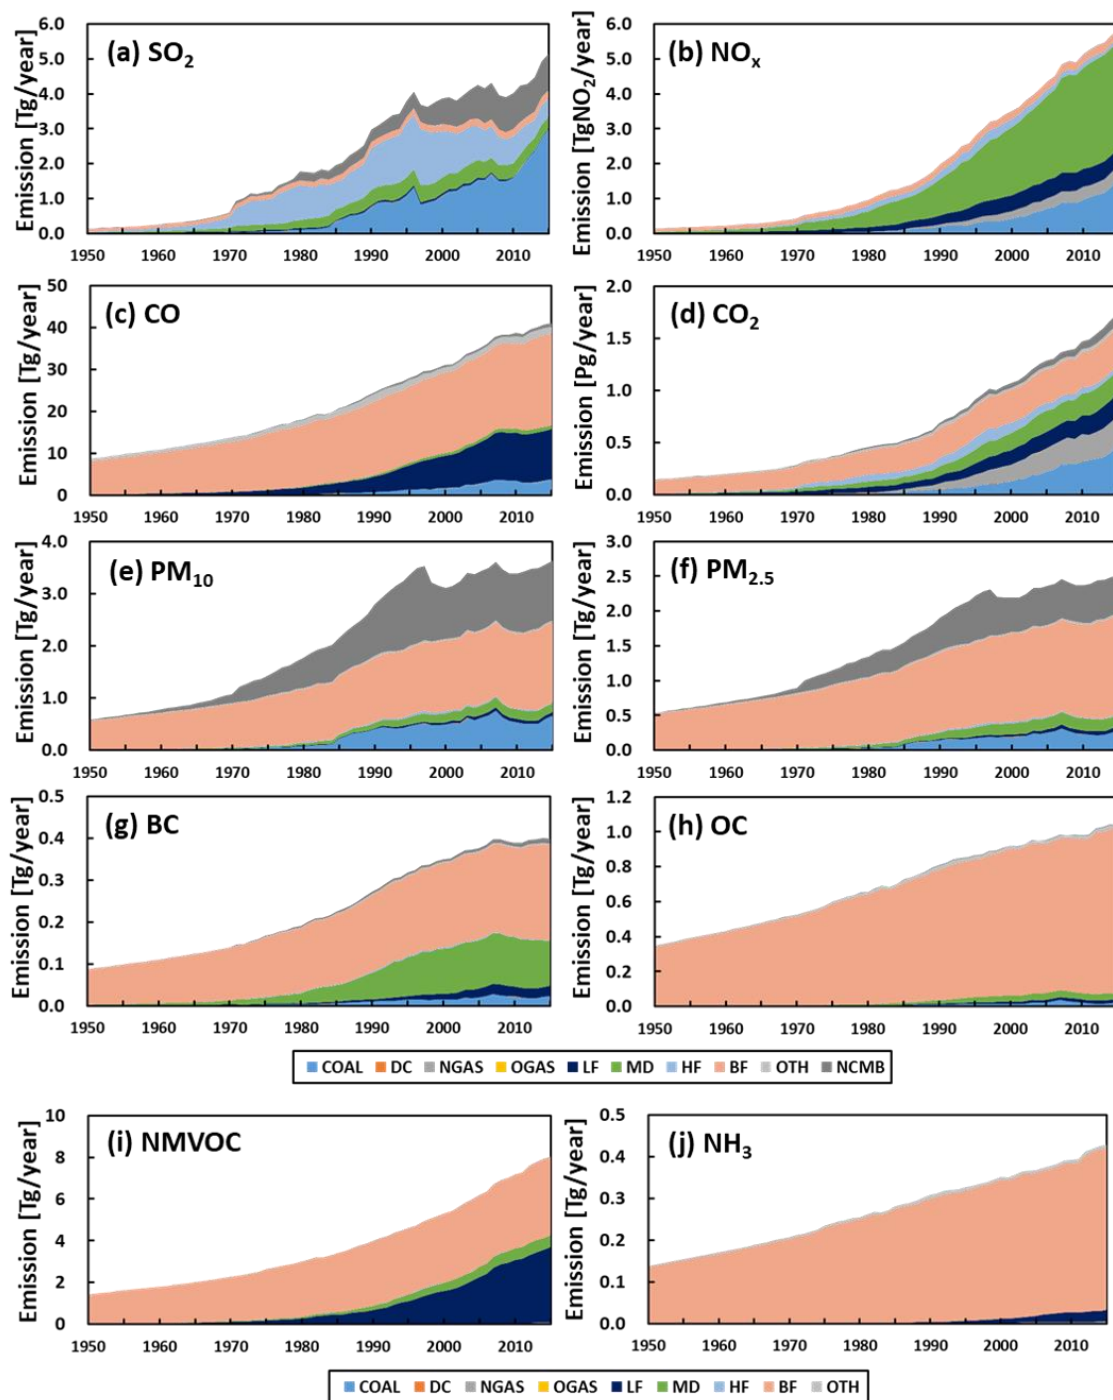

**Figure S8.** Emissions of (a)  $\text{SO}_2$ , (b)  $\text{NO}_x$ , (c) CO, (d)  $\text{CO}_2$ , (e)  $\text{PM}_{10}$ , (f)  $\text{PM}_{2.5}$ , (g) BC, (h) OC, (i) NMVOC, and (j)  $\text{NH}_3$  from each fuel type in SEA from 1950 to 2015. See Fig. 1 for the definitions of SEA.

## OEA Sector

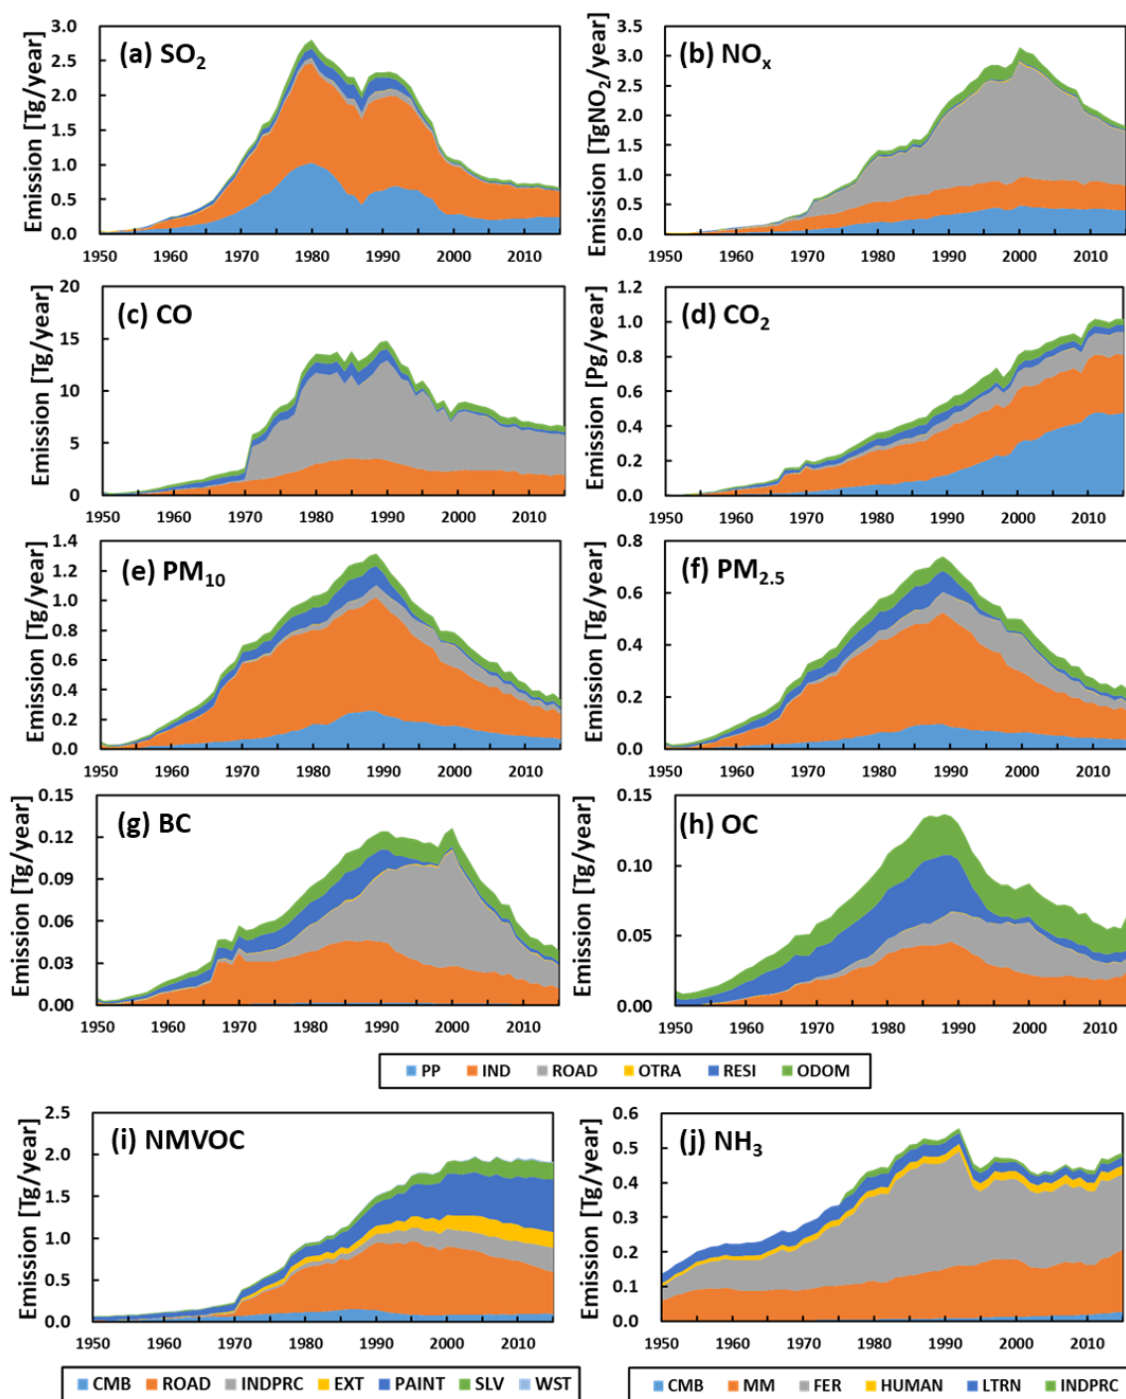

**Figure S9.** Emissions of (a)  $\text{SO}_2$ , (b)  $\text{NO}_x$ , (c) CO, (d)  $\text{CO}_2$ , (e)  $\text{PM}_{10}$ , (f)  $\text{PM}_{2.5}$ , (g) BC, (h) OC, (i) NMVOC, and (j)  $\text{NH}_3$  from major sectors in OEA from 1950 to 2015. See Fig. 1 for the definitions of OEA.

## OEA Fuel

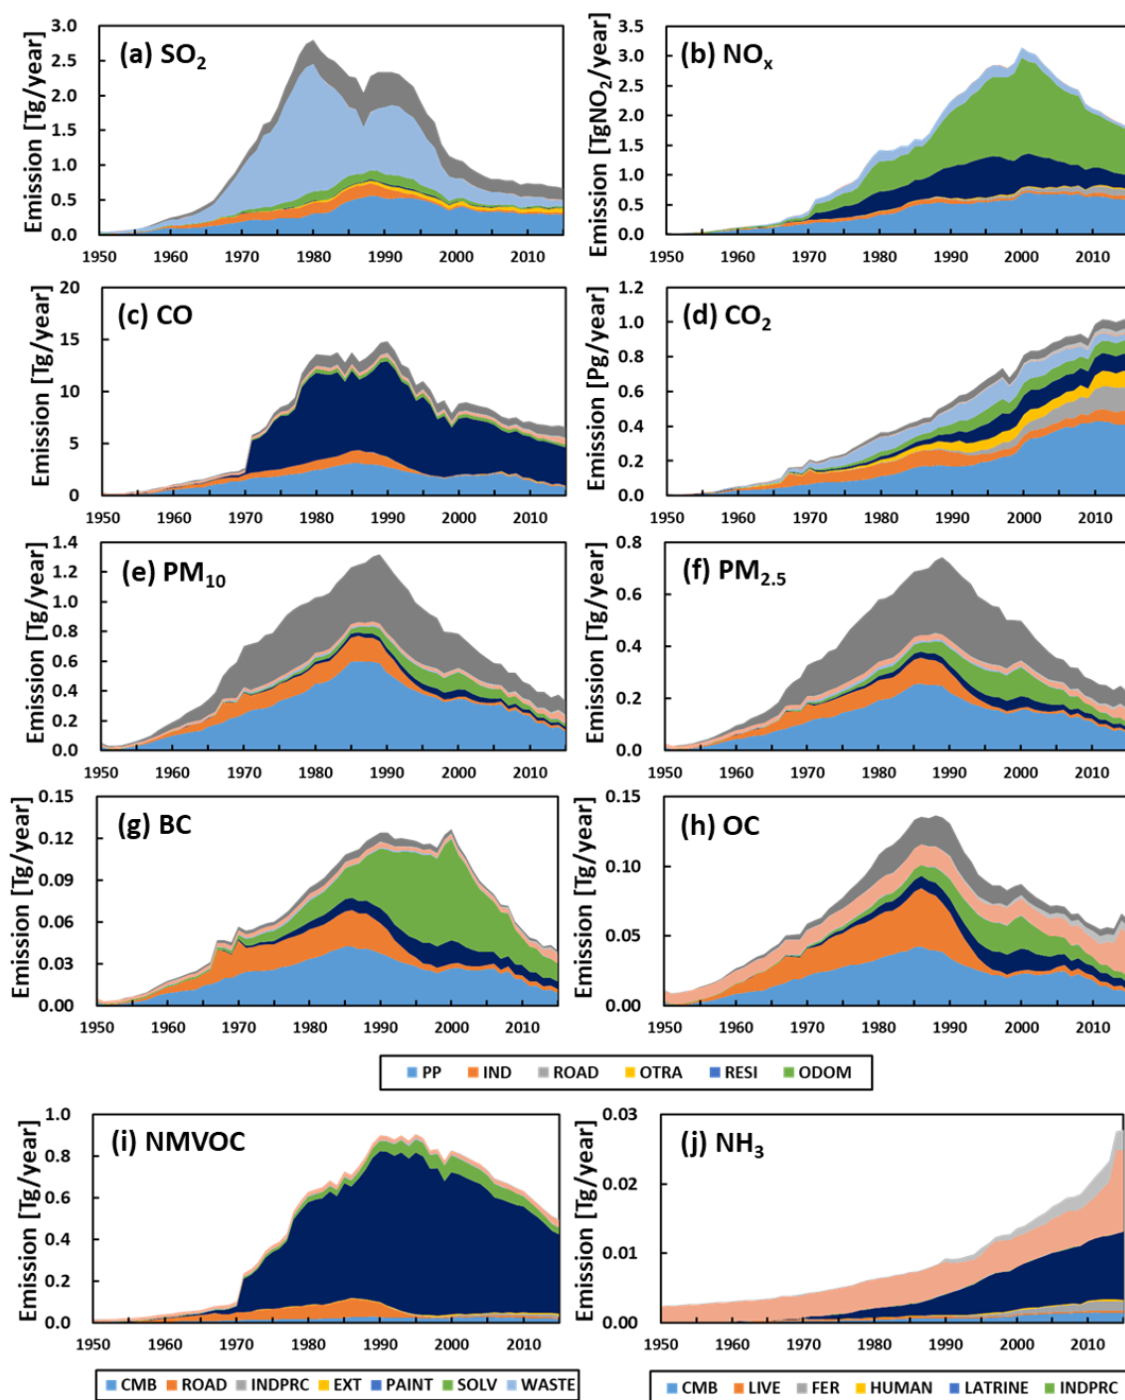

70 **Figure S10.** Emissions of (a)  $\text{SO}_2$ , (b)  $\text{NO}_x$ , (c) CO, (d)  $\text{CO}_2$ , (e)  $\text{PM}_{10}$ , (f)  $\text{PM}_{2.5}$ , (g) BC, (h) OC, (i) NMVOC, and (j)  $\text{NH}_3$  from each fuel type in OEA from 1950 to 2015. See Fig. 1 for the definitions of OEA.

## OSA Sector

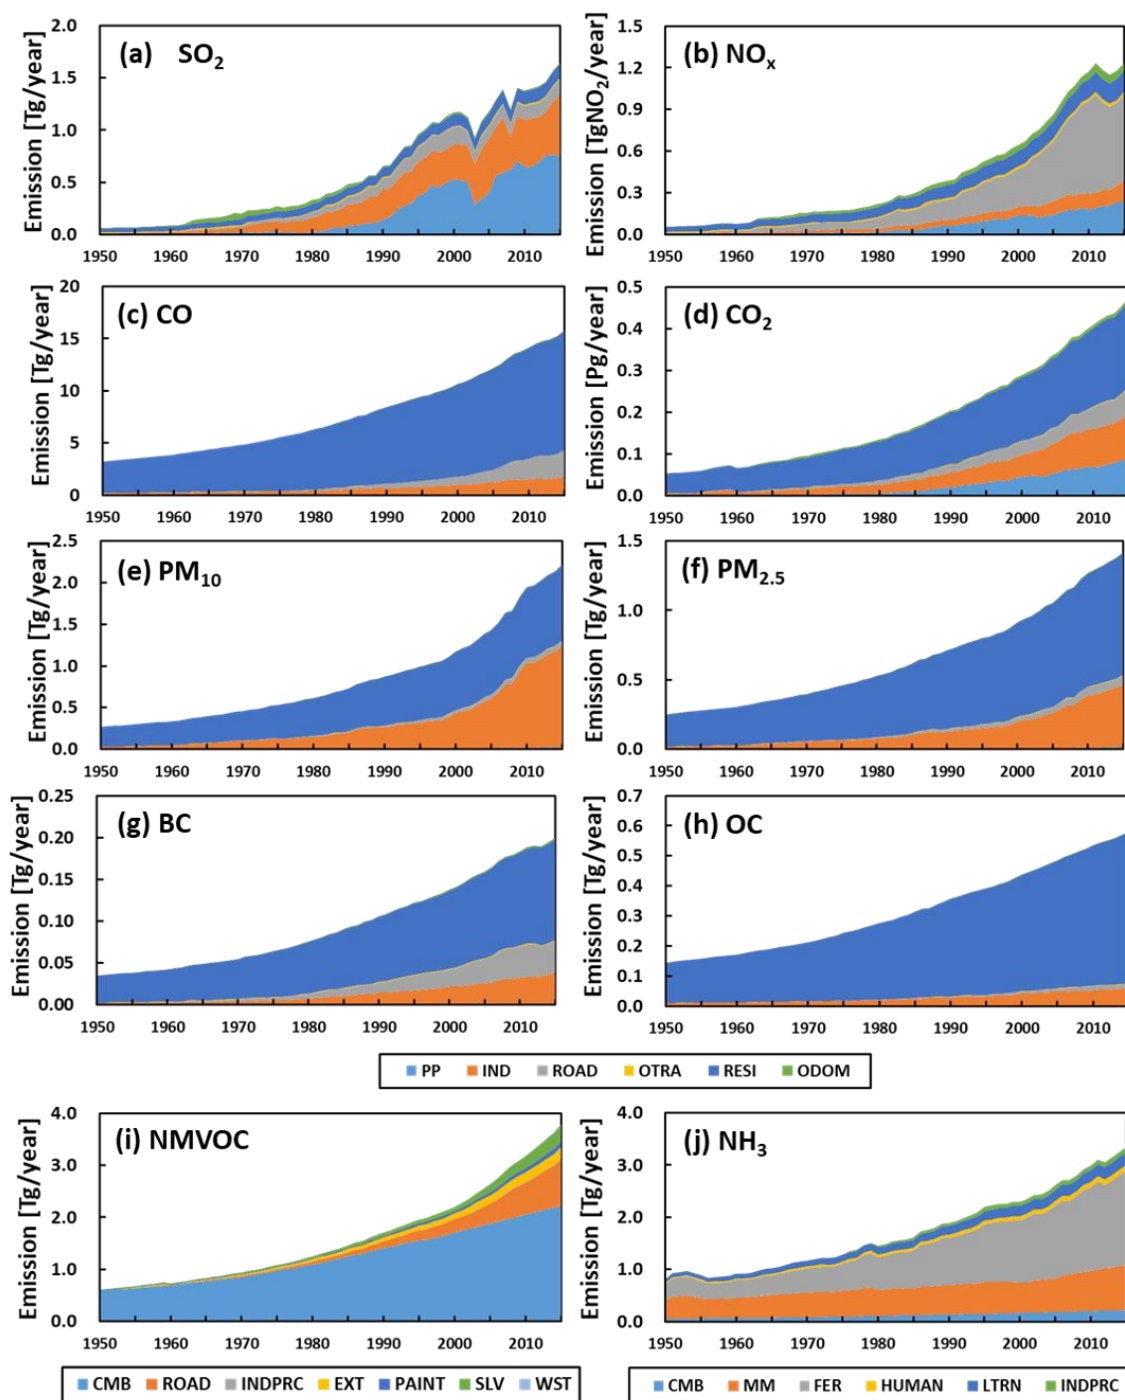

**Figure S11.** Emissions of (a)  $\text{SO}_2$ , (b)  $\text{NO}_x$ , (c)  $\text{CO}$ , (d)  $\text{CO}_2$ , (e)  $\text{PM}_{10}$ , (f)  $\text{PM}_{2.5}$ , (g)  $\text{BC}$ , (h)  $\text{OC}$ , (i)  $\text{NMVOC}$ , and (j)  $\text{NH}_3$  from major sectors in OSA from 1950 to 2015. See Fig. 1 for the definitions of OSA.

## OSA Fuel

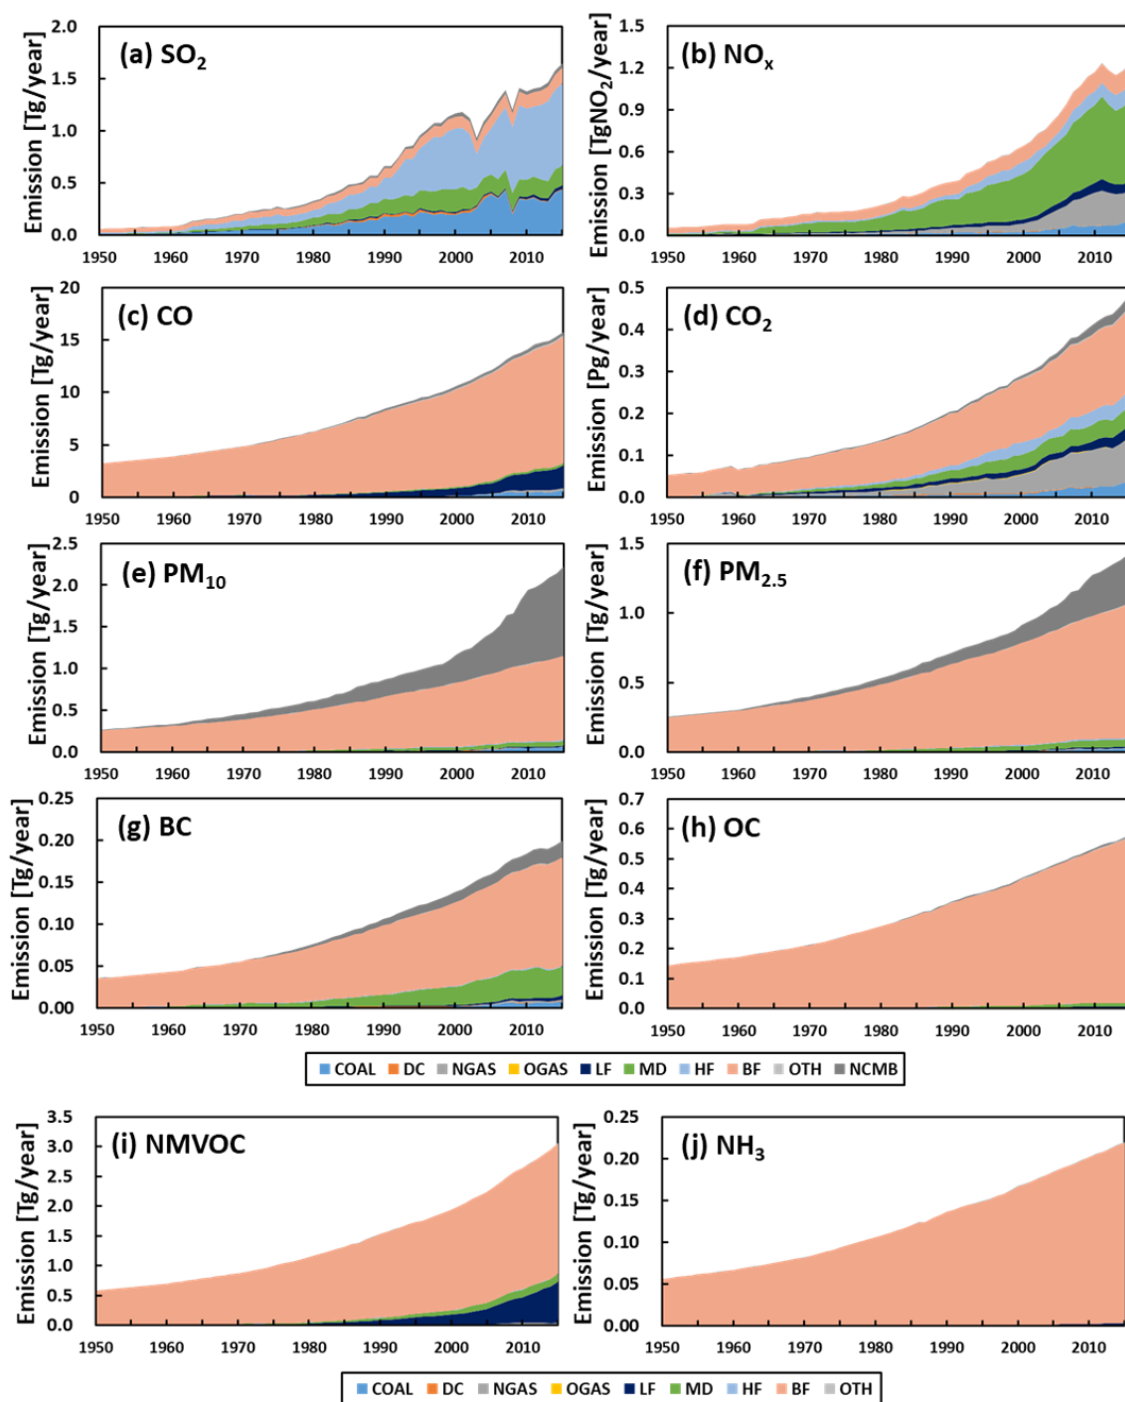

**Figure S12.** Emissions of (a)  $\text{SO}_2$ , (b)  $\text{NO}_x$ , (c)  $\text{CO}$ , (d)  $\text{CO}_2$ , (e)  $\text{PM}_{10}$ , (f)  $\text{PM}_{2.5}$ , (g)  $\text{BC}$ , (h)  $\text{OC}$ , (i)  $\text{NMVOC}$ , and (j)  $\text{NH}_3$  from each fuel type in OSA from 1950 to 2015. See Fig. 1 for the definitions of OSA.

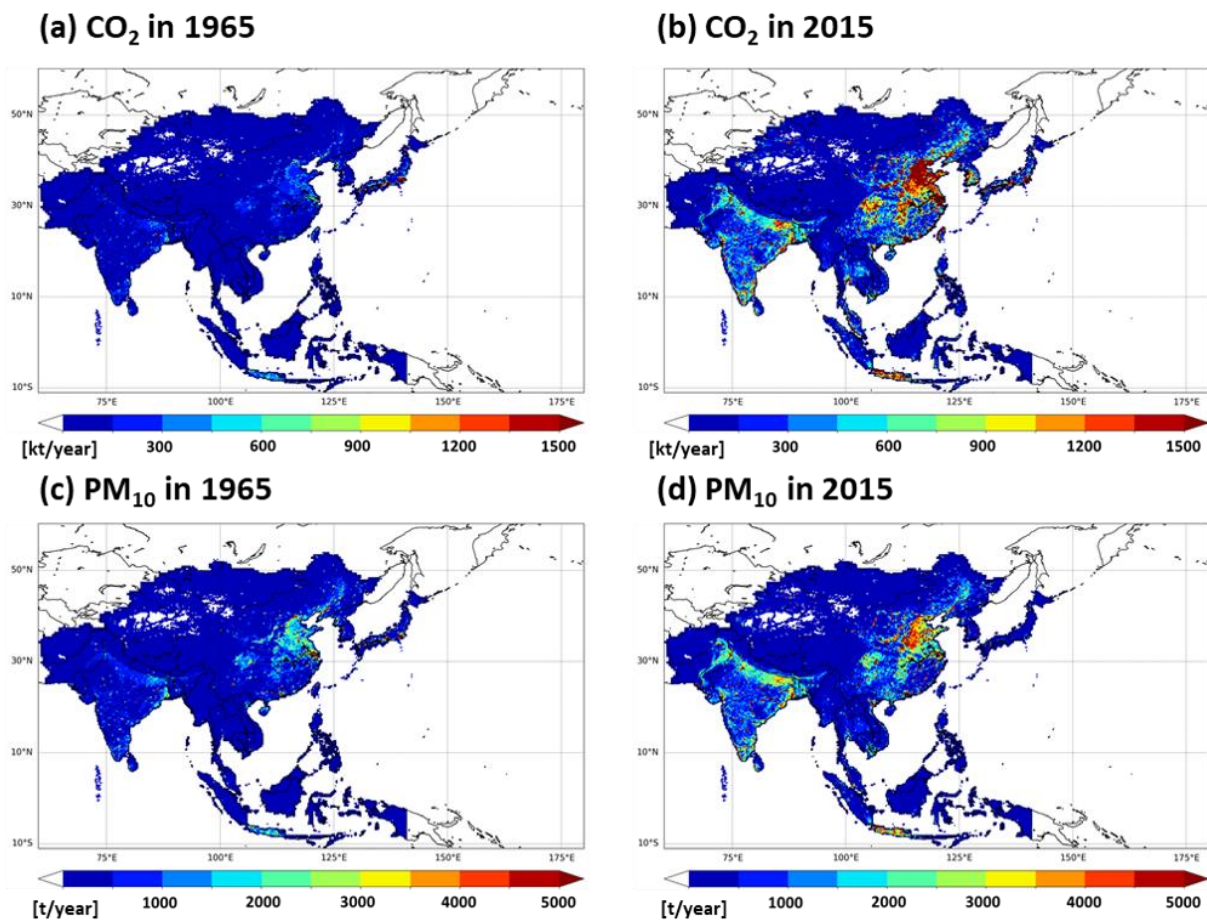

**Figure S13.** Grid maps of annual emissions of (a, b) CO<sub>2</sub> (kt year<sup>-1</sup> per grid cell) and (c, d) PM<sub>10</sub> (t year<sup>-1</sup> per grid cell) in 1965 (left) and 2015 (right).

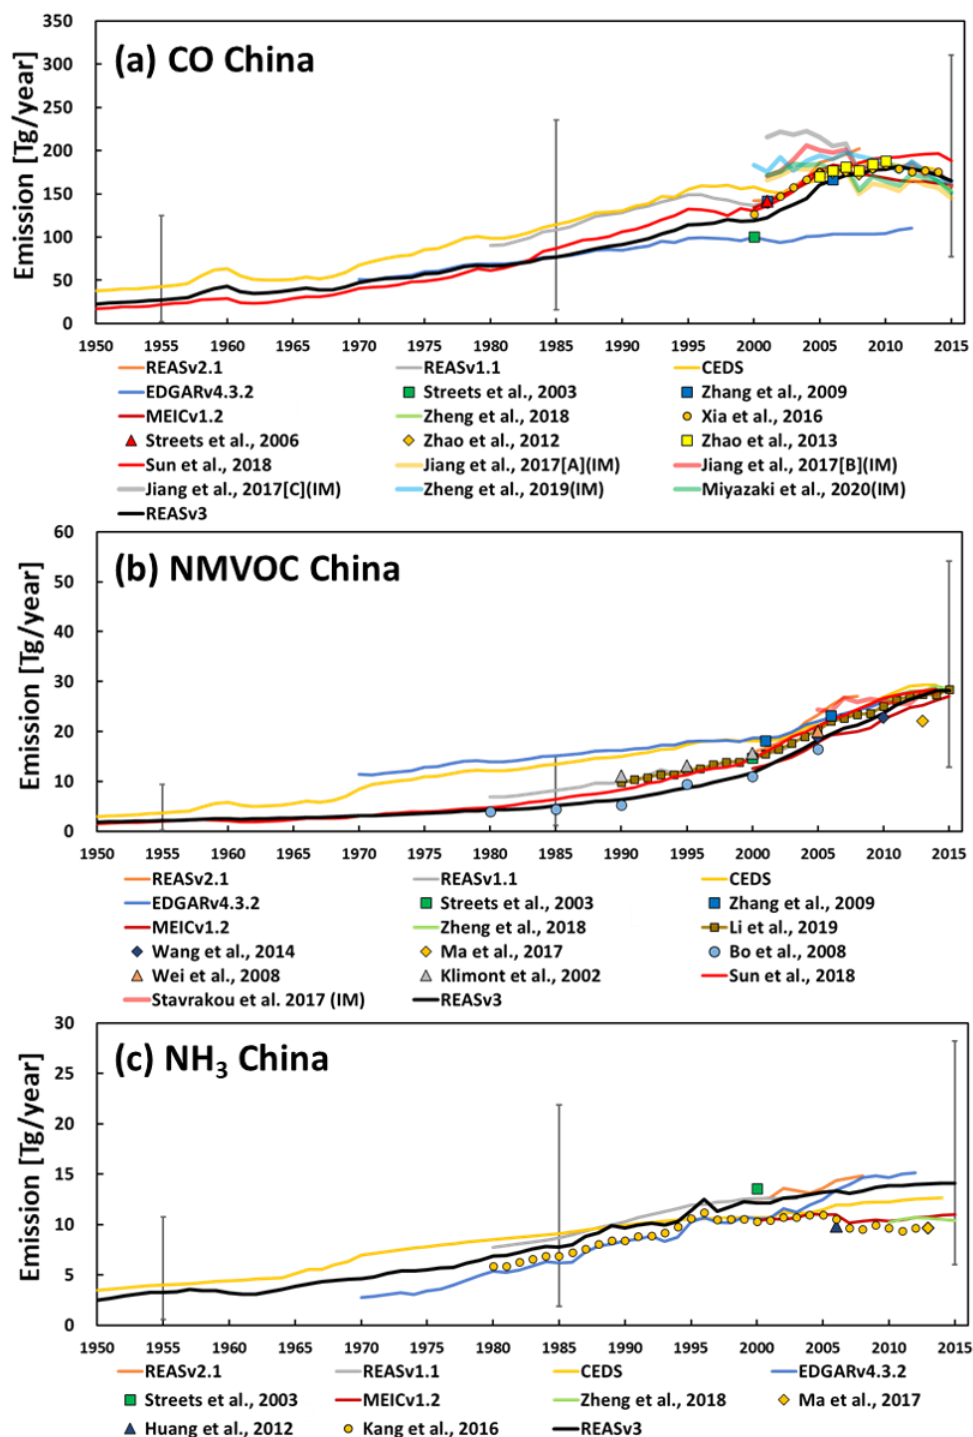

**Figure S14.** Comparison of (a) CO, (b) NMVOC, (c) NH<sub>3</sub>, (d) PM<sub>10</sub>, (e) PM<sub>2.5</sub> and (f) OC emissions in China between REASv3 and other studies. Emissions from domestic and fishing ships were excluded from REAS series, CEDS, and EDGARv4.3.2. Error bars indicate the uncertainty range of REASv3 in 1955, 1985, and 2015.

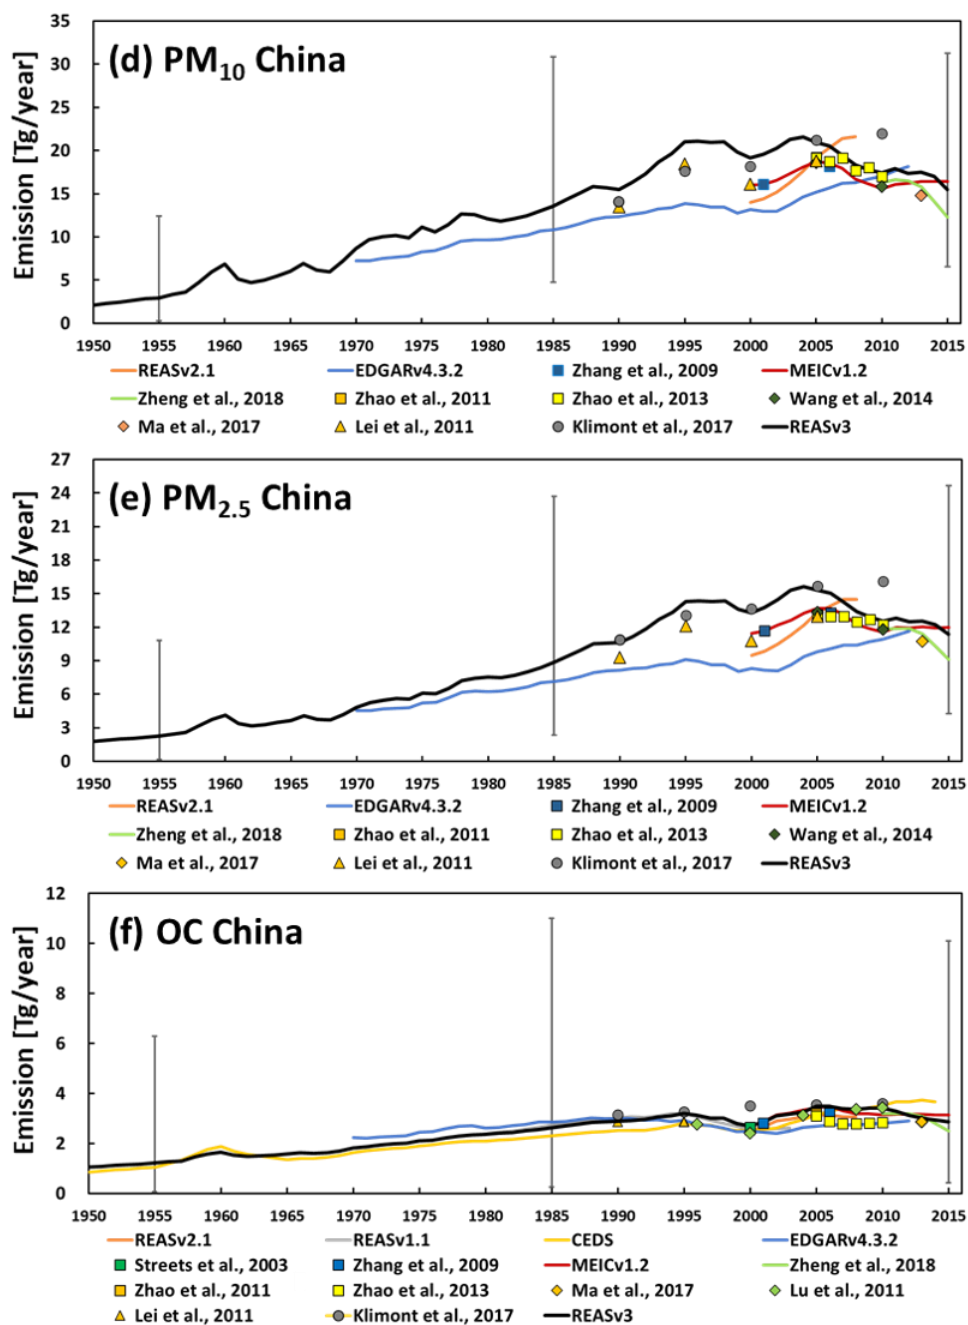

Figure S14. Continued.

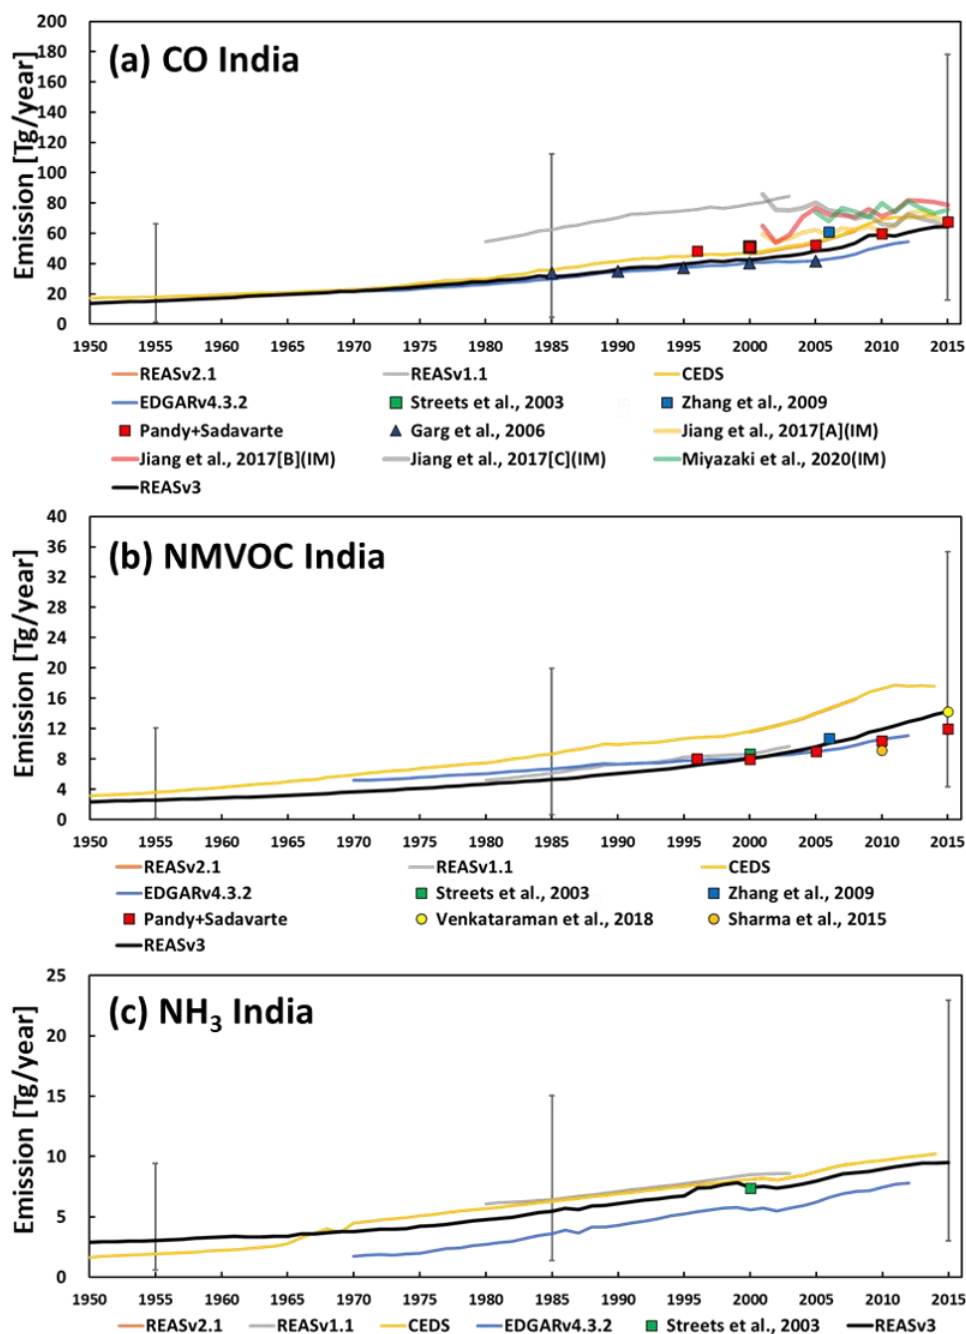

90 **Figure S15.** Comparison of (a) CO, (b) NMVOC, (c) NH<sub>3</sub>, (d) PM<sub>10</sub>, (e) PM<sub>2.5</sub> and (f) OC emissions in India between REASv3 and other studies. Emissions from domestic and fishing ships were excluded from REAS series, CEDS, and EDGARv4.3.2. Note that values of "Pandy+Sadavarte" are calculated from Pandey et al. (2014) and Sadavarte and Venkataraman (2014). Error bars indicate the uncertainty range of REASv3 in 1955, 1985, and 2015.

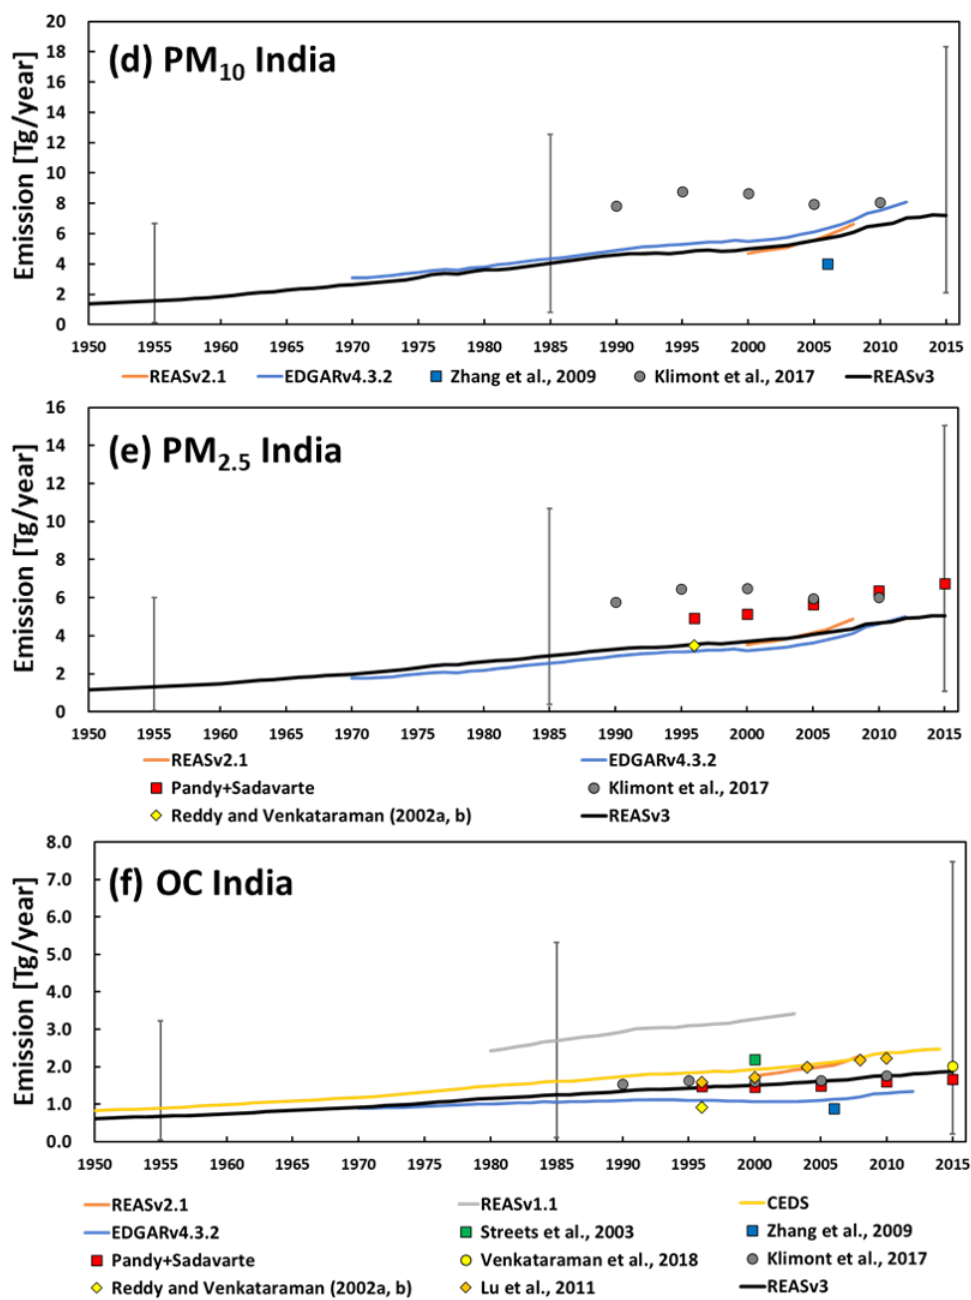

95

Figure S15. Continued.

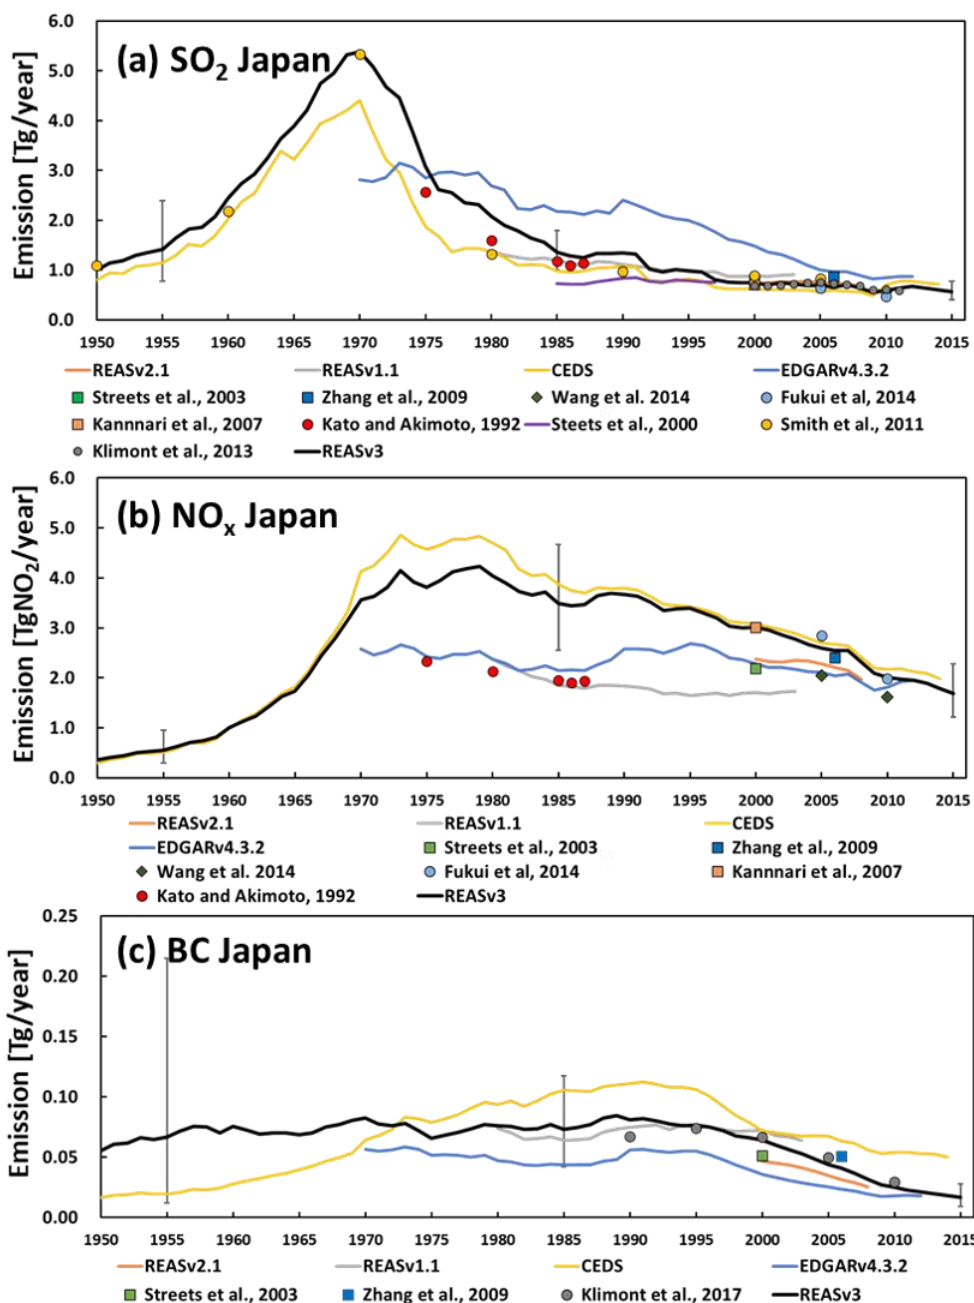

**Figure S16.** Comparison of (a) SO<sub>2</sub>, (b) NO<sub>x</sub>, (c) BC, (d) CO, (e) NMVOC, (f) NH<sub>3</sub>, (g) PM<sub>10</sub>, (h) PM<sub>2.5</sub> and (i) OC emissions in Japan between REASv3 and other studies. Emissions from domestic and fishing ships were excluded from REAS series, CEDS, EDGARv4.3.2, Kannari et al. (2007), and Fukui et al. (2013). Error bars indicate the uncertainty range of REASv3 in 1955, 1985, and 2015.

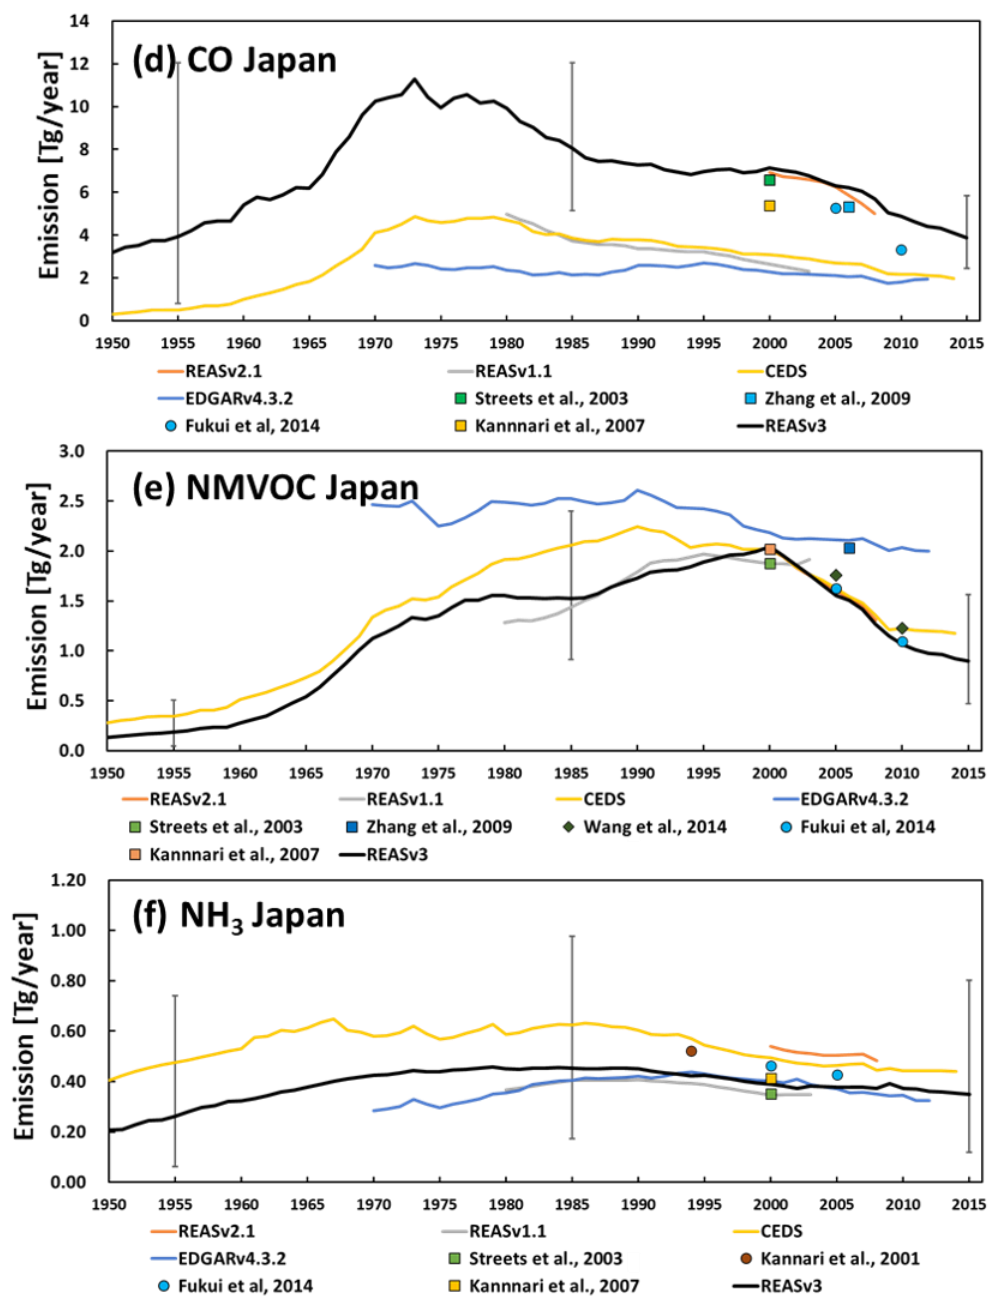

Figure S16. Continued.

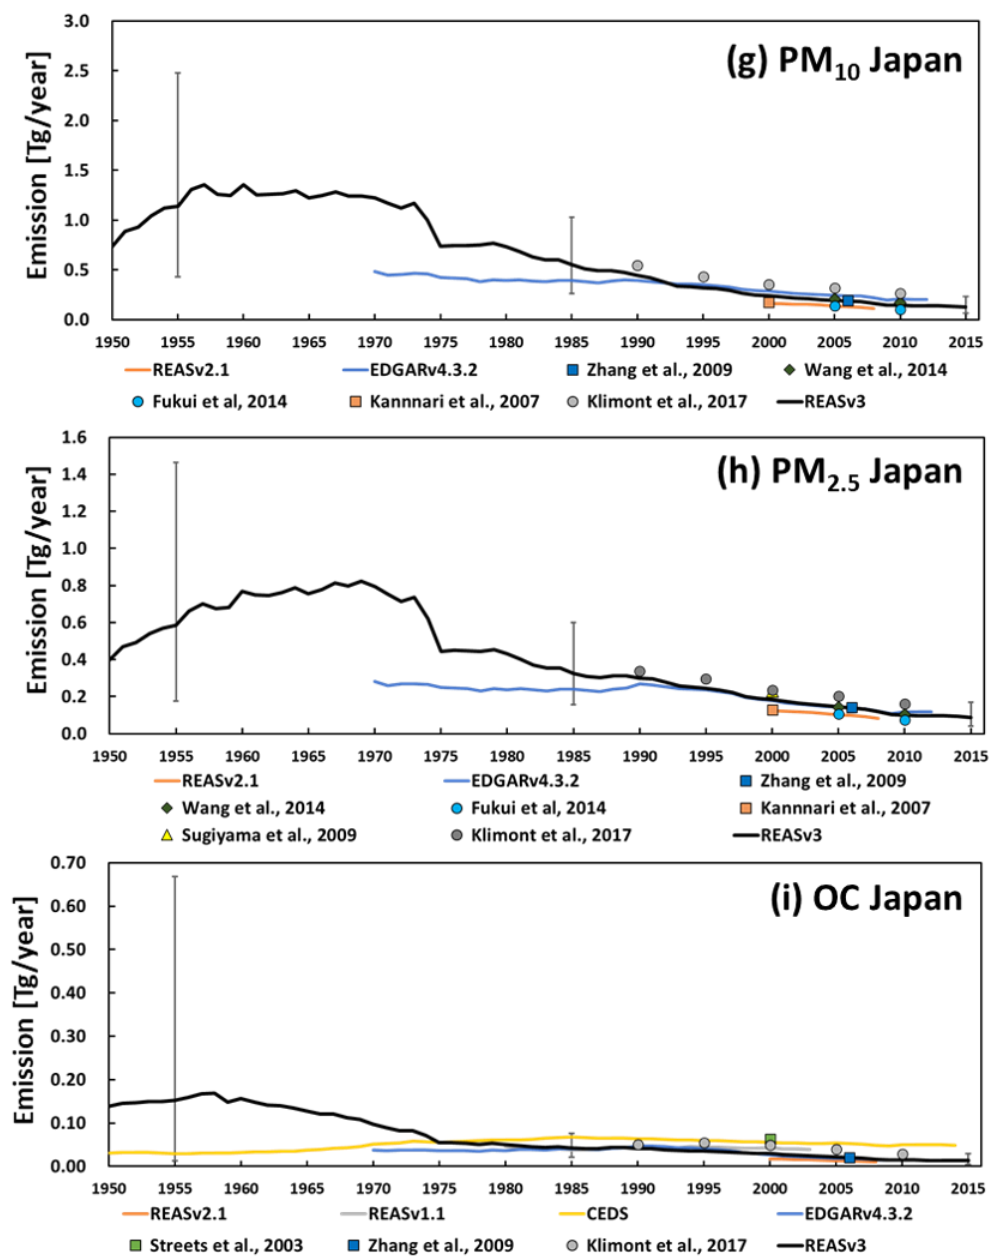

Figure S16. Continued.

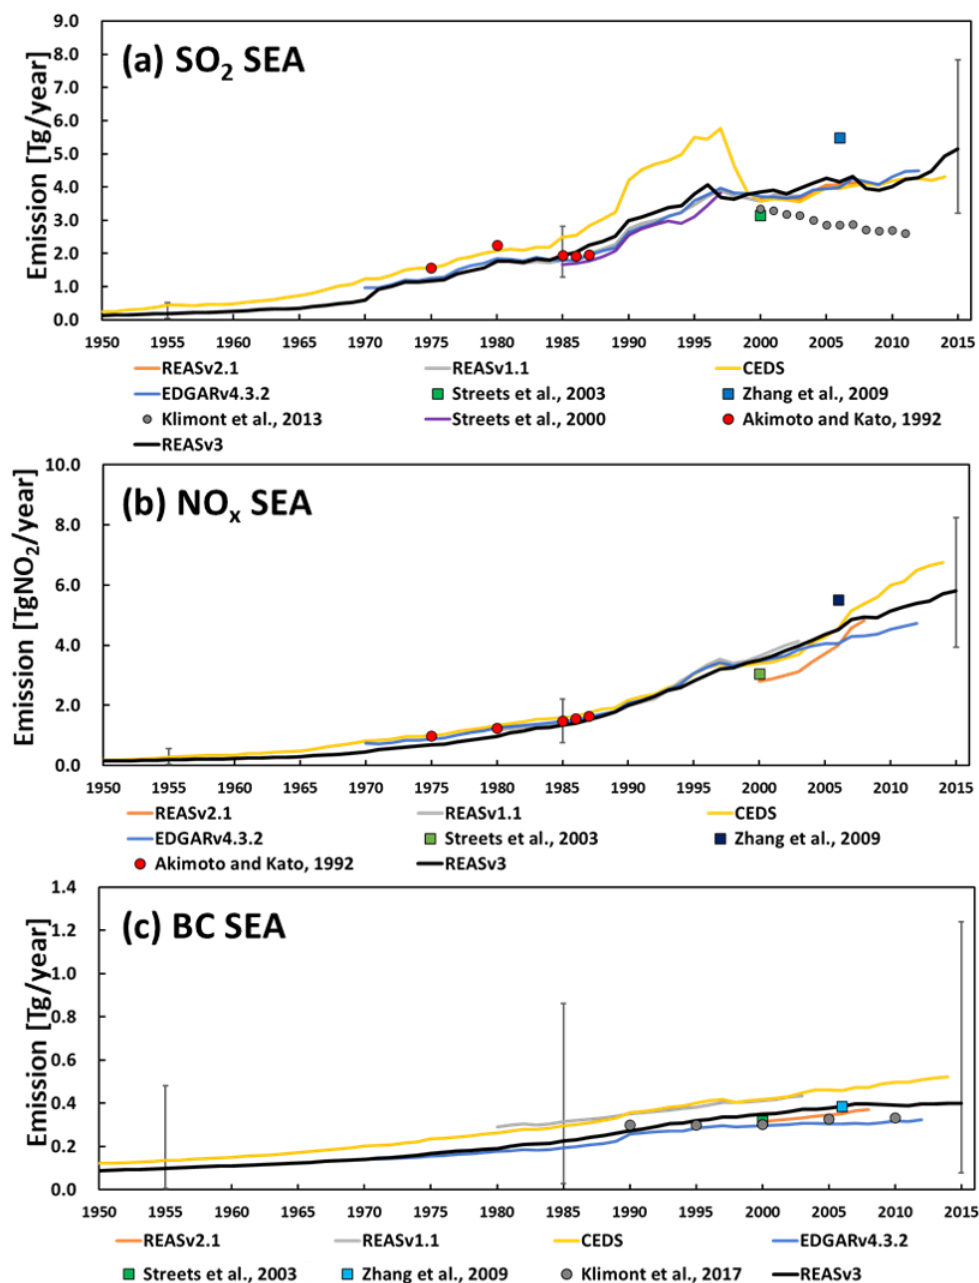

**Figure S17.** Comparison of (a) SO<sub>2</sub>, (b) NO<sub>x</sub>, (c) BC, (d) CO, (e) NMVOC, (f) NH<sub>3</sub>, (g) PM<sub>10</sub>, (h) PM<sub>2.5</sub> and (i) OC emissions in SEA between REASv3 and other studies. Emissions from domestic and fishing ships were excluded from REAS series, CEDS, and EDGARv4.3.2. See Fig. 1 for the definitions of SEA. Error bars indicate the uncertainty range of REASv3 in 1955, 1985, and 2015.

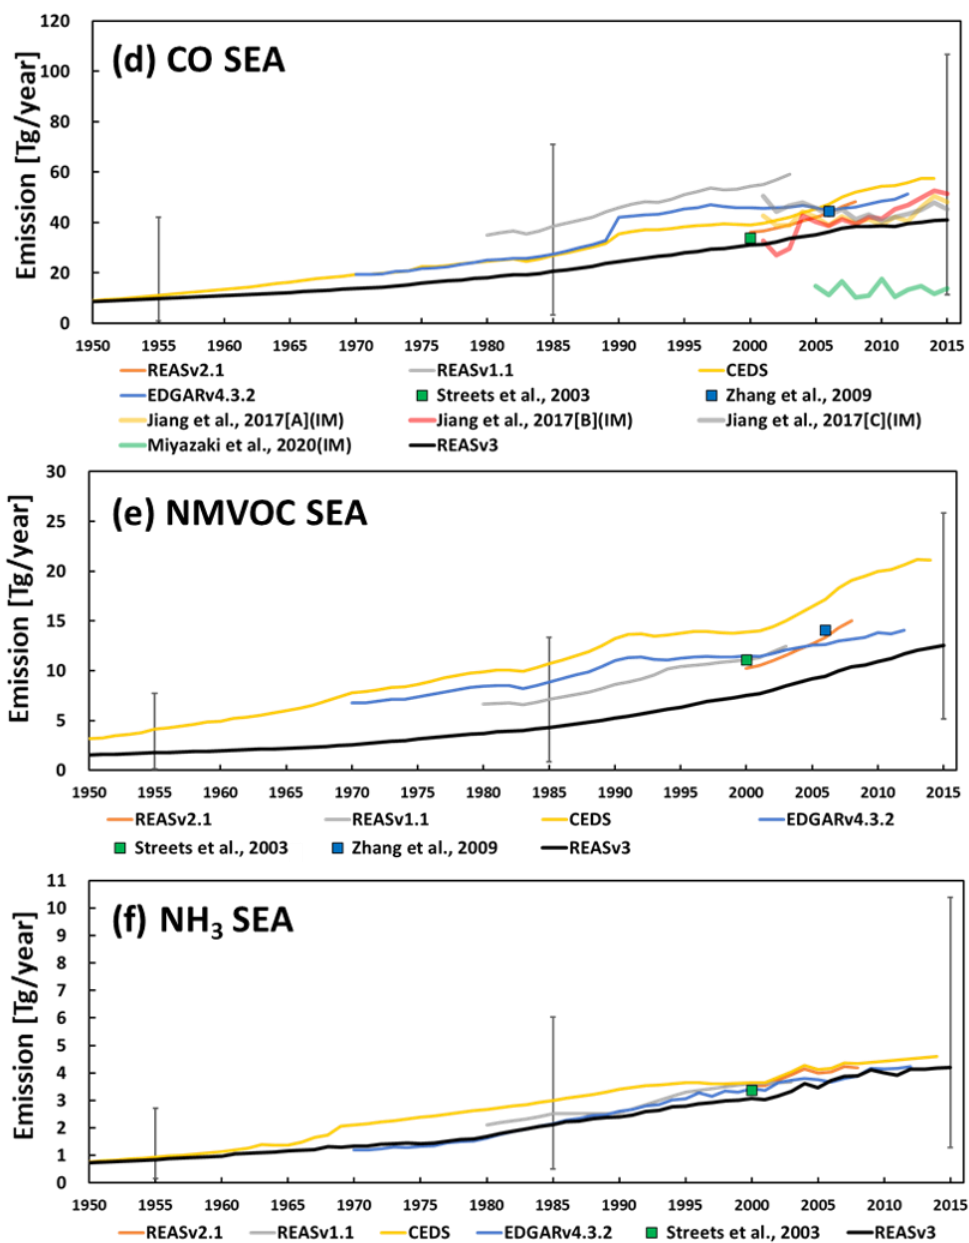

Figure S17. Continued.

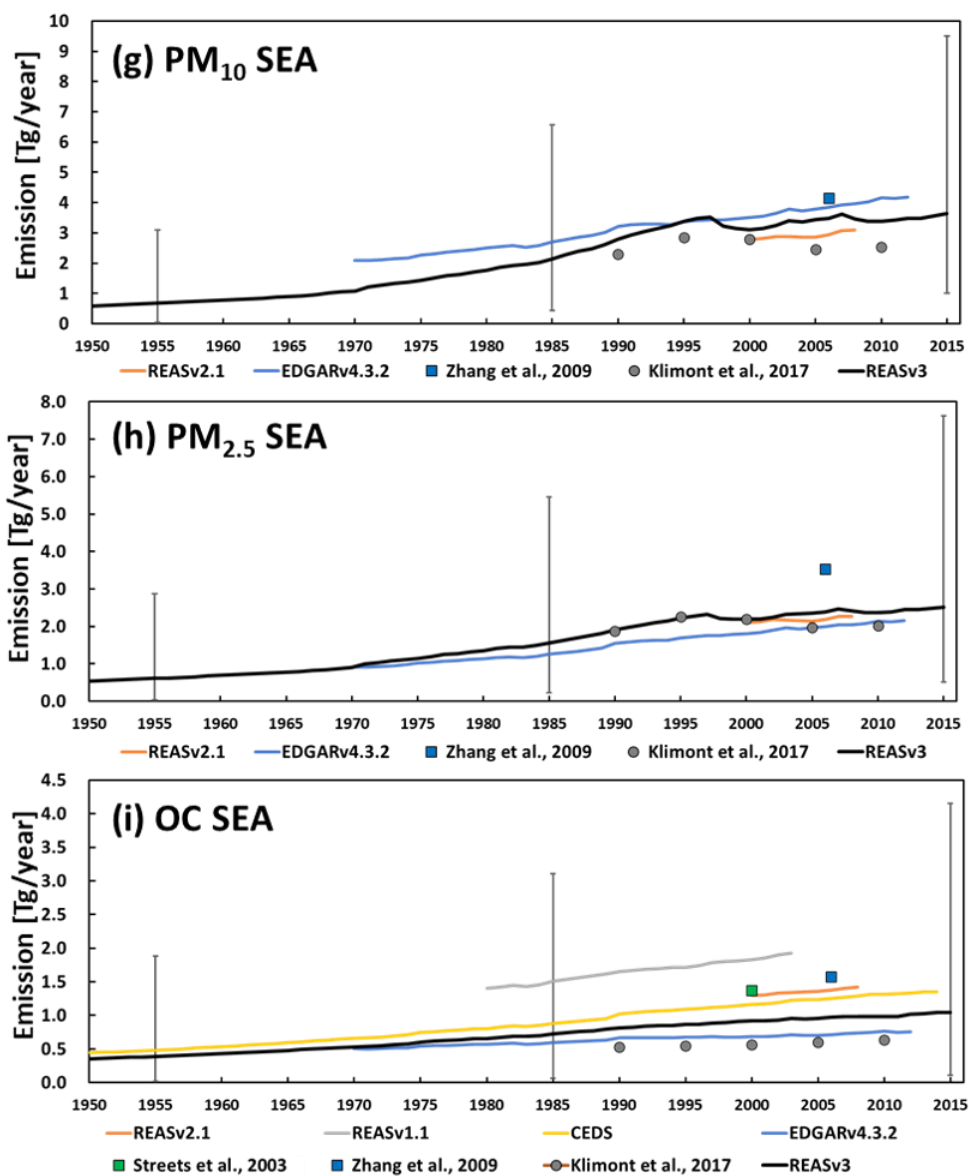

Figure S17. Continued.

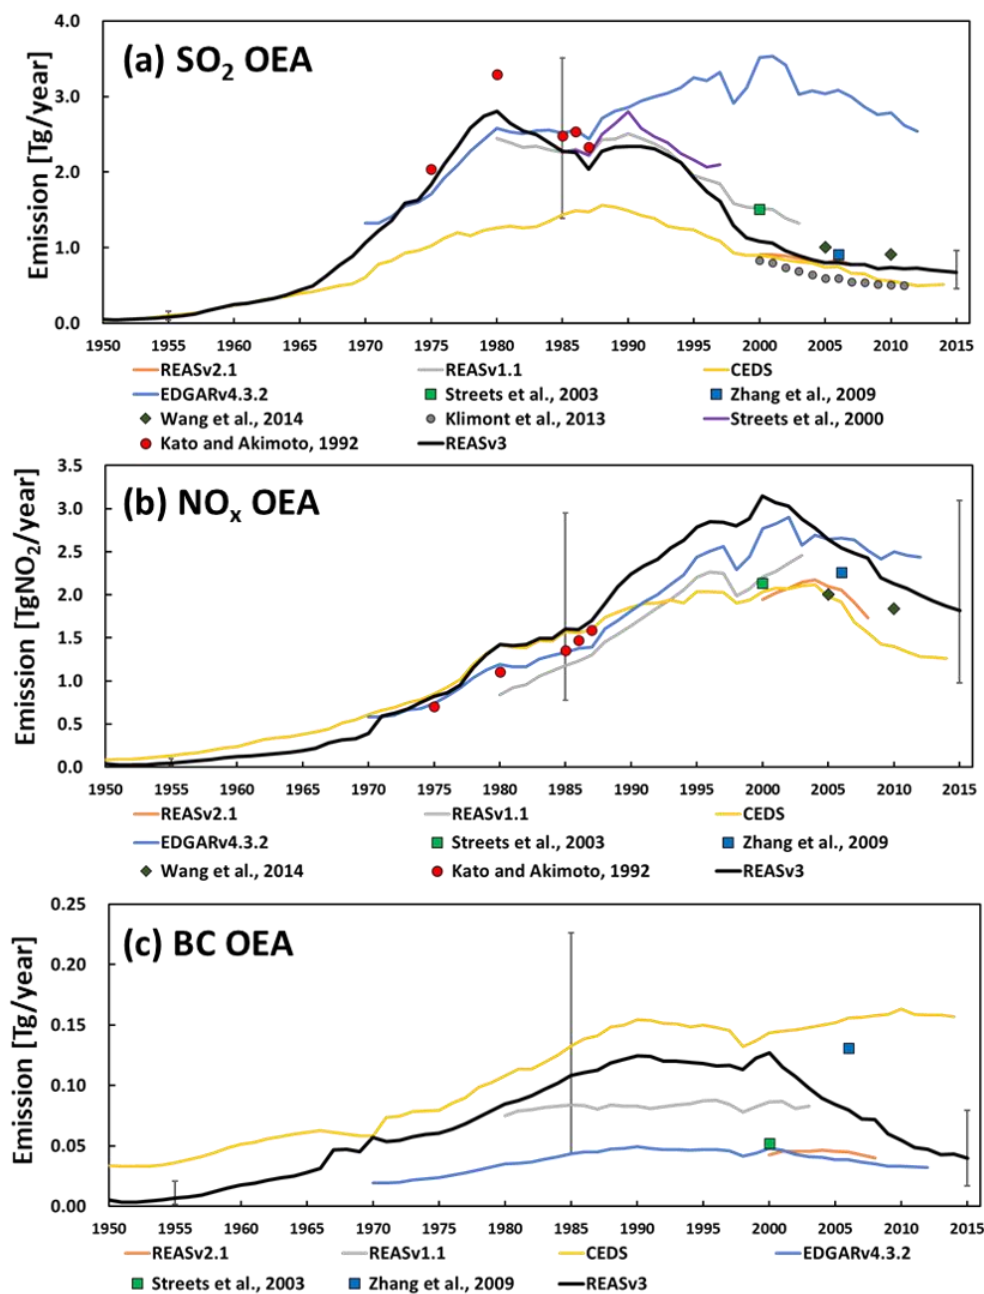

120 **Figure S18.** Comparison of (a) SO<sub>2</sub>, (b) NO<sub>x</sub>, (c) BC, (d) CO, (e) NMVOC, (f) NH<sub>3</sub>, (g) PM<sub>10</sub>, (h) PM<sub>2.5</sub> and (i) OC emissions in OEA between REASv3 and other studies. Emissions from domestic and fishing ships were excluded from REAS series, CEDS, and EDGARv4.3.2. See Fig. 1 for the definitions of OEA. Error bars indicate the uncertainty range of REASv3 in 1955, 1985, and 2015.

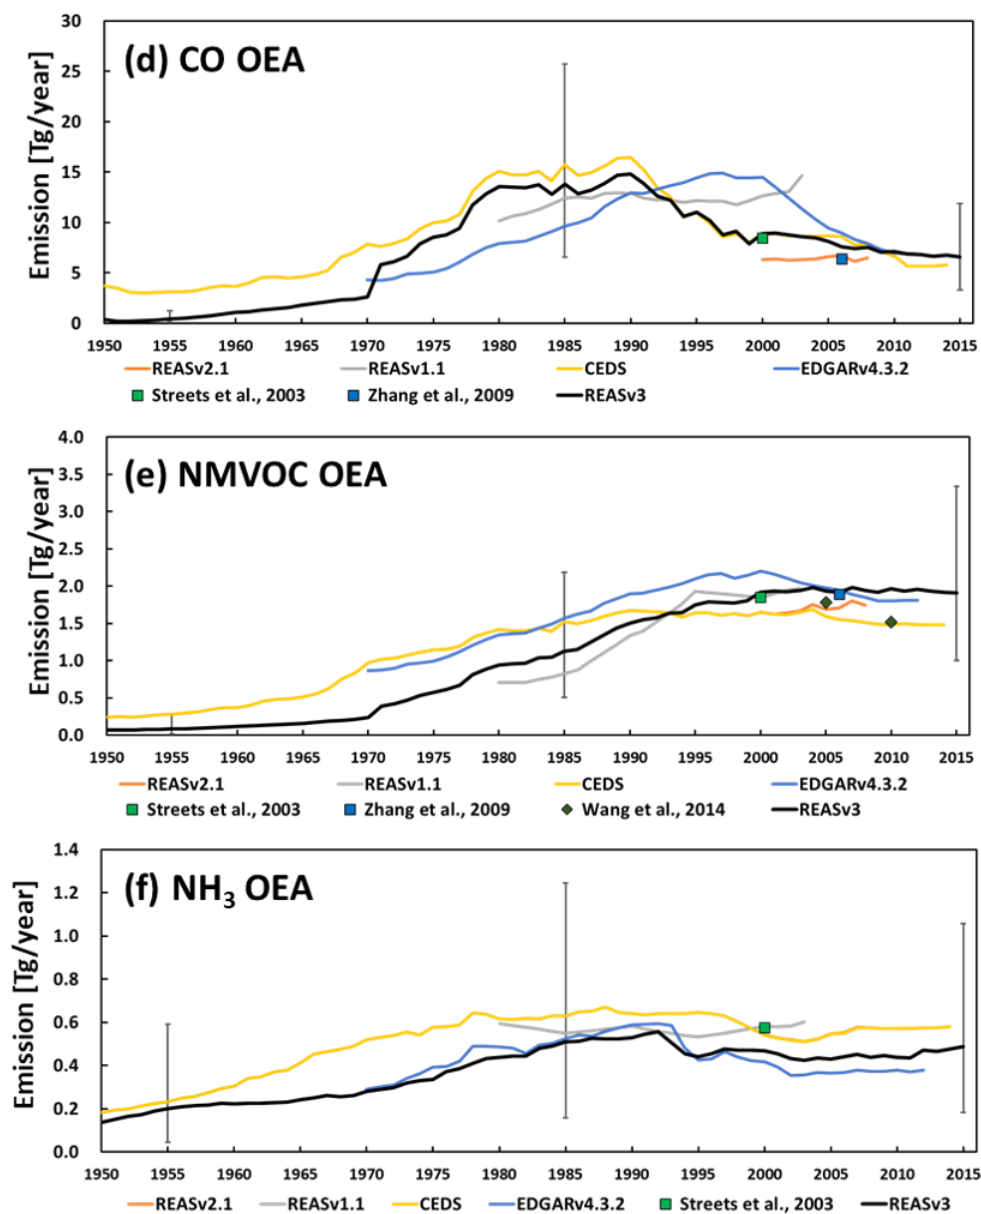

125 Figure S18. Continued.

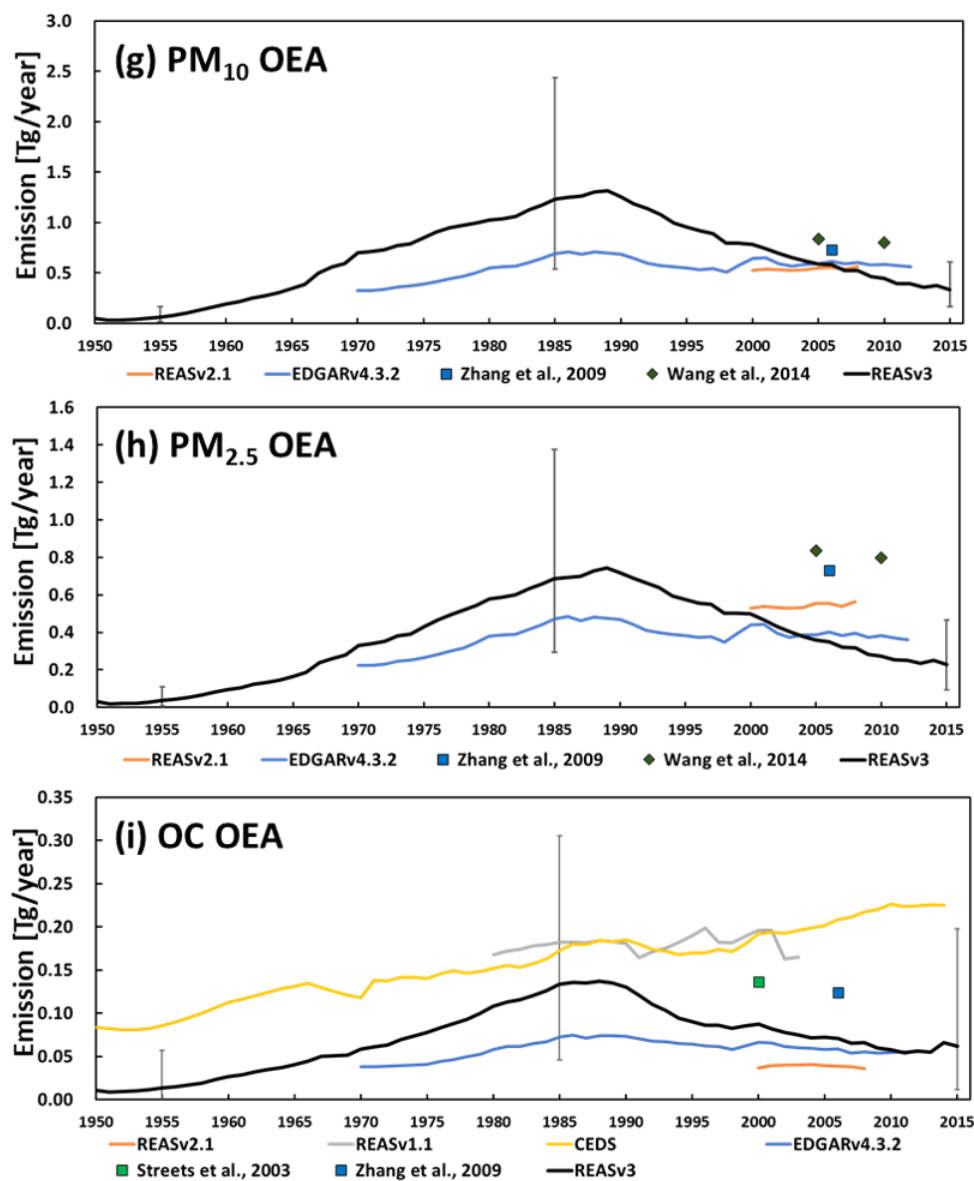

Figure S18. Continued.

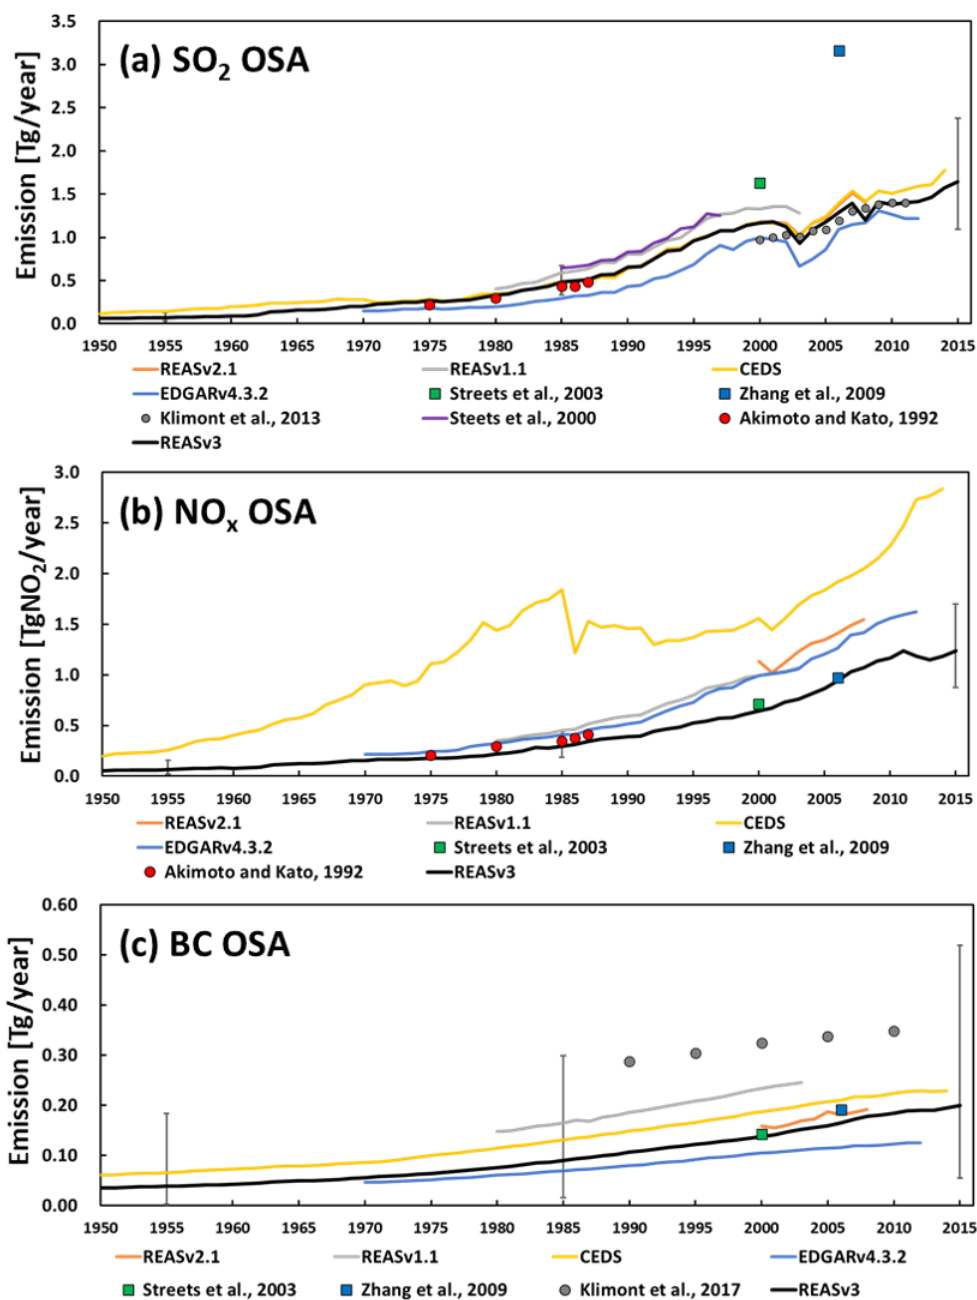

**Figure S19.** Comparison of (a) SO<sub>2</sub>, (b) NO<sub>x</sub>, (c) BC, (d) CO, (e) NMVOC, (f) NH<sub>3</sub>, (g) PM<sub>10</sub>, (h) PM<sub>2.5</sub> and (i) OC emissions in OSA between REASv3 and other studies. Emissions from domestic and fishing ships were excluded from REAS series, CEDS, and EDGARv4.3.2. See Fig. 1 for the definitions of OSA. Error bars indicate the uncertainty range of REASv3 in 1955, 1985, and 2015.

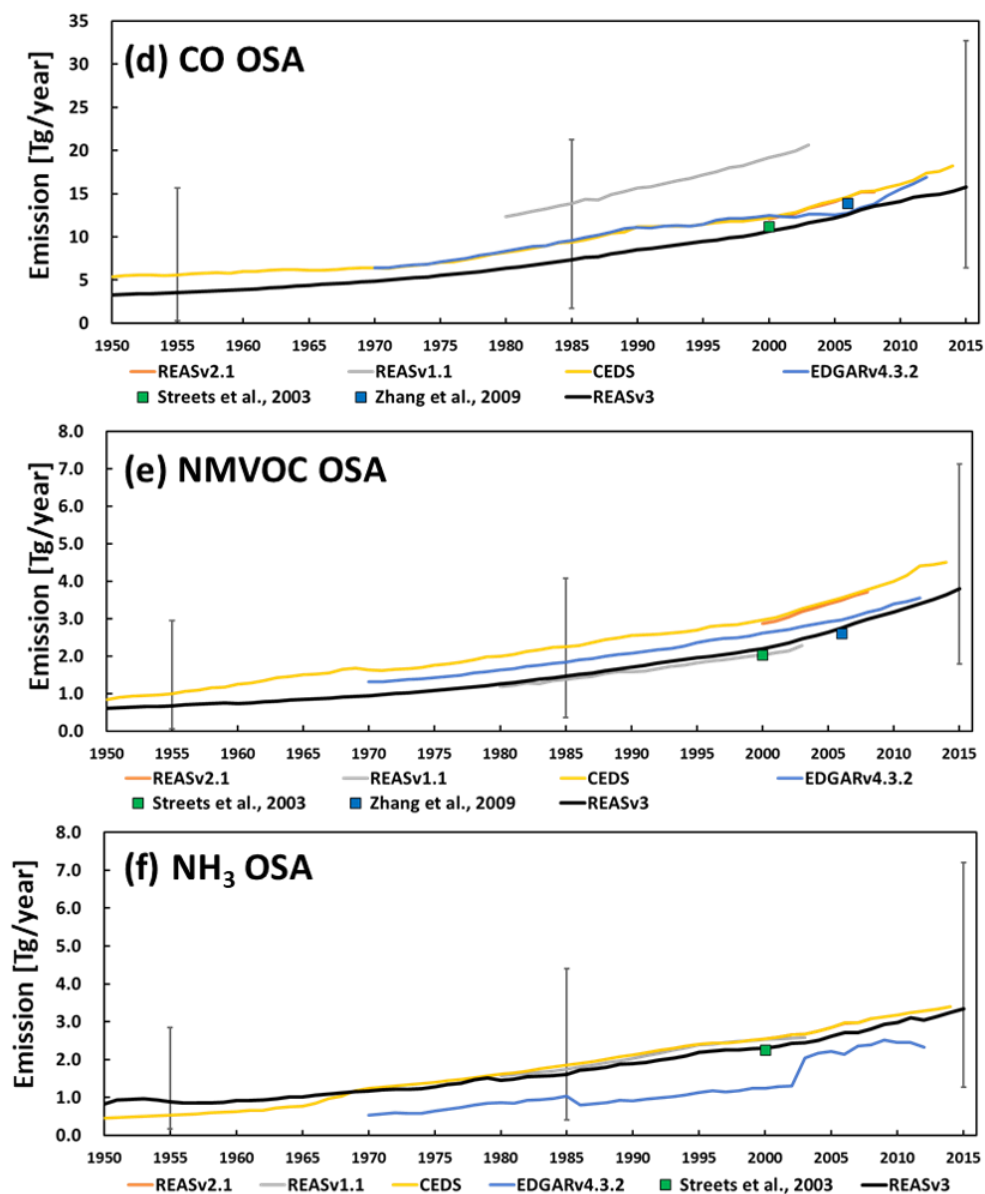

Figure S19. Continued.

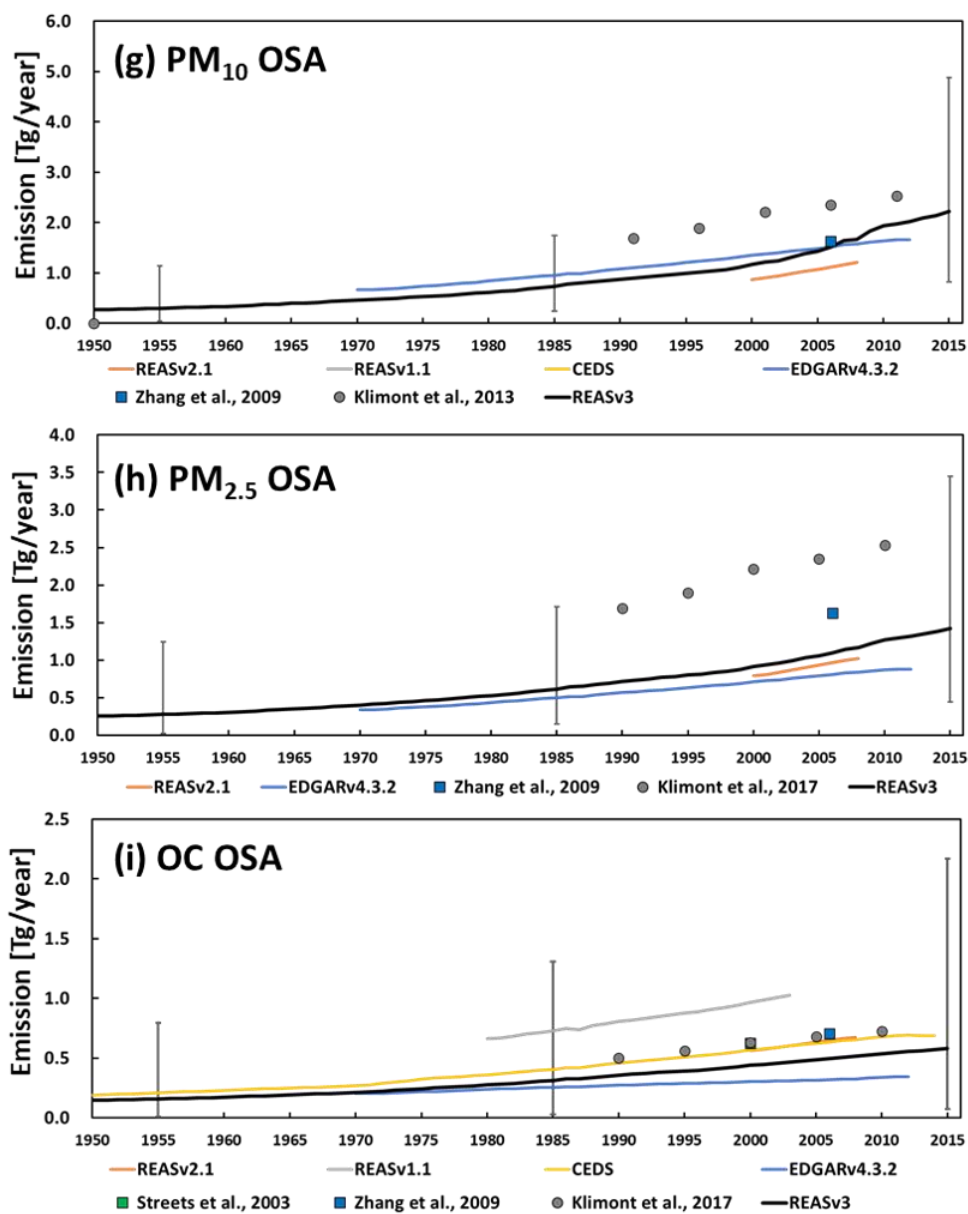

Figure S19. Continued.

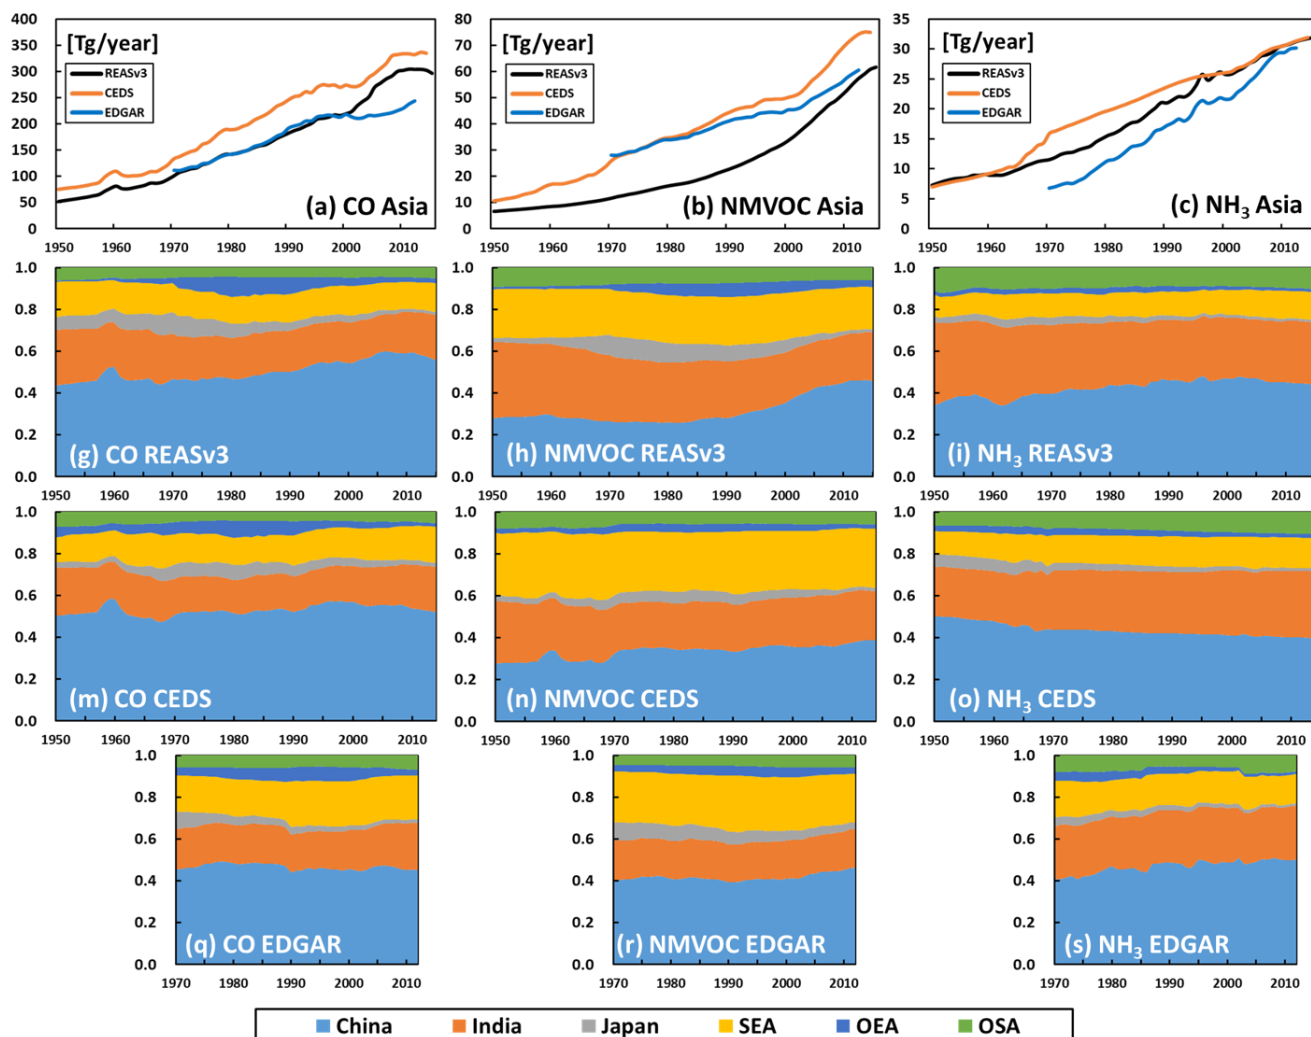

**Figure S20.** Comparison of trends of (a) CO, (b) NMVOC, (c) NH<sub>3</sub>, (d) PM<sub>10</sub>, (e) PM<sub>2.5</sub>, and (f) OC emissions in Asia and relative ratios of emissions from China, India, Japan, SEA, OEA, and OSA for (g, h, i) REASv3, (m, n, o) CEDS, and (q, r, s) EDGARv4.3.2. See Fig. 1 for the definitions of SEA, OEA, and OSA.

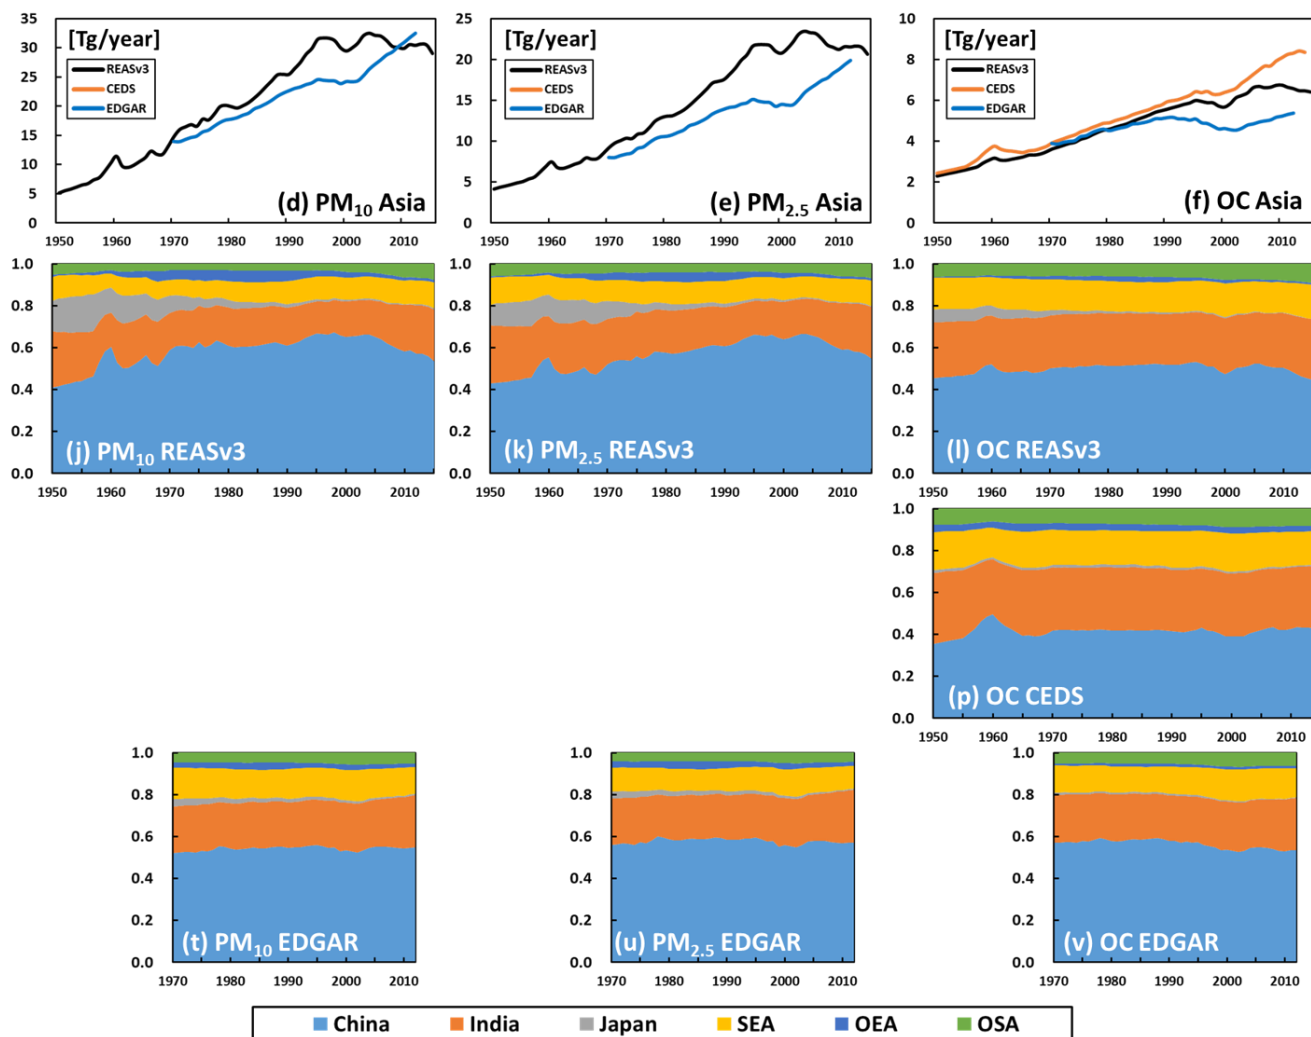

Figure S20. Continued.

## References

- 150 Bo, Y., Cai, H., and Xie, S. D.: Spatial and temporal variation of historical anthropogenic NMVOCs emission inventories in China, *Atmos. Chem. Phys.*, 8, 7297–7316, <https://doi.org/10.5194/acp-8-7297-2008>, 2008.
- Fukui, T., Kokuryo, K., Baba, T., and Kannari, A.: Updating EAGrid2000-Japan emissions inventory based on the recent emission trends (in Japanese), *J. Jpn. Soc. Atmos. Environ.*, 2, 117–125, <https://doi.org/10.11298/taiki.49.117>, 2014.
- Garg, A., Shukla, P. R., and Kaphe, M.: The sectoral trends of multigas emissions inventory of India, *Atmos. Environ.*, 40, 4608–4620, <https://doi.org/10.1016/j.atmosenv.2006.03.045>, 2006.
- 155 Huang, X., Song, Y., Li, M., Li, J., Huo, Q., Cai, X., Zhu, T., Hu, M., and Zhang, H.: A high-resolution ammonia emission inventory in China, *Global Biogeochem. Cy.*, 26, GB1030, <https://doi.org/10.1029/2011GB004161>, 2012.
- Jiang, Z., Worden, J. R., Worden, H., Deeter, M., Jones, D. B. A., Arellano, A. F., and Henze, D. K.: A 15-year record of CO emissions constrained by MOPITT CO observations, *Atmos. Chem. Phys.*, 17, 4565–4583, [https://doi.org/10.5194/acp-](https://doi.org/10.5194/acp-17-4565-2017)
- 160 17-4565-2017, 2017.
- Kang, Y., Liu, M., Song, Y., Huang, X., Yao, H., Cai, X., Zhang, H., Kang, L., Liu, X., Yan, X., He, H., Zhang, Q., Shao, M., and Zhu, T.: High-resolution ammonia emissions inventories in China from 1980 to 2012, *Atmos. Chem. Phys.*, 16, 2043–2058, <https://doi.org/10.5194/acp-16-2043-2016>, 2016.
- Kannari, A., Baba, T., and Hayami, H.: Estimation of ammonia emissions in Japan (in Japanese), *J. Jpn. Soc. Atmos. Environ.*, 36, 29–38, <https://doi.org/10.11298/taiki1995.36.29>, 2001.
- 165 Kannari, A., Tonooka, Y., Baba, T., and Murano, K.: Development of multiple-species 1 km × 1 km resolution hourly basis emissions inventory for Japan, *Atmos. Environ.*, 41, 3428–3439, <https://doi.org/10.1016/j.atmosenv.2006.12.015>, 2007.
- Kato, N. and Akimoto, H.: Anthropogenic emissions of SO<sub>2</sub> and NO<sub>x</sub> in Asia: emissions inventories, *Atmos. Environ.*, 26, 2997–3017, [https://doi.org/10.1016/0960-1686\(92\)90291-R](https://doi.org/10.1016/0960-1686(92)90291-R), 1992.
- 170 Klimont, Z., Streets, D. G., Gupta, S., Cofala, J., Lixin, F., and Ichikawa, Y.: Anthropogenic emissions of non-methane volatile organic compounds in China, *Atmos. Environ.*, 36, 1309–1322, [https://doi.org/10.1016/S1352-2310\(01\)00529-5](https://doi.org/10.1016/S1352-2310(01)00529-5), 2002.
- Klimont, Z., Smith, S. J., and Cofala, J.: The last decade of global anthropogenic sulfur dioxide: 2000–2011 emissions, *Environ. Res., Lett.*, 8, 014003, <https://doi.org/10.1088/1748-9326/8/1/014003>, 2013.
- 175 Klimont, Z., Kupiainen, K., Heyes, C., Purohit, P., Cofala, J., Rafaj, P., Borken-Kleefeld, J., and Schöpp, W.: Global anthropogenic emissions of particulate matter including black carbon, *Atmos. Chem. Phys.*, 17, 8681–8723, <https://doi.org/10.5194/acp-17-8681-2017>, 2017.
- Lei, Y., Zhang, Q., He, K. B., and Streets, D. G.: Primary anthropogenic aerosol emission trends for China, 1990–2005, *Atmos. Chem. Phys.*, 11, 931–954, <https://doi.org/10.5194/acp-11-931-2011>, 2011.
- 180 Li, M., Zhang, Q., Zheng, B., Tong, D., Lei, Y., Liu, F., Hong, C., Kang, S., Yan, L., Zhang, Y., Bo, Y., Su, H., Cheng, Y., and He, K.: Persistent growth of anthropogenic non-methane volatile organic compound (NMVOC) emissions in China

- during 1990–2017: drivers, speciation and ozone formation potential, *Atmos. Chem. Phys.*, 19, 8897–8913, <https://doi.org/10.5194/acp-19-8897-2019>, 2019.
- Lu, Z., Zhang, Q., and Streets, D. G.: Sulfur dioxide and primary carbonaceous aerosol emissions in China and India, 1996–  
185 2010, *Atmos. Chem. Phys.*, 11, 9839–9864, <https://doi.org/10.5194/acp-11-9839-2011>, 2011.
- Ma, Q., Cai, S., Wang, S., Zhao, B., Martin, R. V., Brauer, M., Cohen, A., Jiang, J., Zhou, W., Hao, J., Frostad, J., Forouzanfar, M. H., and Burnett, R. T.: Impacts of coal burning on ambient PM<sub>2.5</sub> pollution in China, *Atmos. Chem. Phys.*, 17, 4477–4491, <https://doi.org/10.5194/acp-17-4477-2017>, 2017.
- Miyazaki, K., Bowman, K., Sekiya, T., Eskes, H., Boersma, F., Worden, H., Livesey, N., Payne, V. H., Sudo, K., Kanaya, Y.,  
190 Takigawa, M., and Ogochi, K.: An updated tropospheric chemistry reanalysis and emission estimates, TCR-2, for 2005–2018, *Earth Syst. Sci. Data Discuss.*, <https://doi.org/10.5194/essd-2020-30>, 2020.
- Pandey, A., Sadavarte, P., Rao, A. B., and Venkataraman, C.: Trends in multi-pollutant emissions from a technology-linked inventory for India: II. Residential, agricultural and informal industry sectors, 99, 341–352, <https://doi.org/10.1016/j.atmosenv.2014.09.080>, 2014.
- 195 Reddy, M. S. and Venkataraman, C.: Inventory of aerosol and sulphur dioxide emissions from India: I – Fossil fuel combustion, *Atmos. Environ.*, 36, 677–697, [https://doi.org/10.1016/S1352-2310\(01\)00463-0](https://doi.org/10.1016/S1352-2310(01)00463-0), 2002a.
- Reddy, M. S. and Venkataraman, C.: Inventory of aerosol and sulphur dioxide emissions from India. Part II – biomass combustion, *Atmos. Environ.*, 36, 699–712, [https://doi.org/10.1016/S1352-2310\(01\)00464-2](https://doi.org/10.1016/S1352-2310(01)00464-2), 2002b.
- Sadavarte, P. and Venkataraman, C.: Trends in multi-pollutant emissions from a technology-linked inventory for India: I.  
200 Industry and transport sectors, *Atmos. Environ.*, 99, 353–364, <https://doi.org/10.1016/j.atmosenv.2014.09.081>, 2014.
- Sharma, S., Goel, A., Gupta, D., Kumar, A., Mishra, A., Kundu, S., Chatani, S., and Klimont, Z.: Emission inventory of non-methane volatile organic compounds from anthropogenic sources in India, *Atmos. Environ.*, 102, 209–219, <https://doi.org/10.1016/j.atmosenv.2014.11.070>, 2015.
- Smith, S. J., van Aardenne, J., Klimont, Z., Andres, R. J., Volke, A., and Delgado Arias, S.: Anthropogenic sulfur dioxide  
205 emissions: 1850–2005, *Atmos. Chem. Phys.*, 11, 1101–1116, <https://doi.org/10.5194/acp-11-1101-2011>, 2011.
- Stavrakou, T., Muller, J. F., Bauwens, M., De Smedt, I.: Sources and long-term trends of ozone precursors to Asian Pollution, *Air Pollution in Eastern Asia : an integrated perspective*, eds. Bouarar, I., Wang, X., Brasseur, G., Springer international Publishing, 167–189, <https://doi.org/10.1007/978-3-319-59489-7>, 2017.
- Streets, D. G., Tsai, N. Y., Akimoto, H., and Oka, K.: Sulfur dioxide emissions in Asia in the period 1985–1997, 34, 4413–  
210 4424, [https://doi.org/10.1016/S1352-2310\(00\)00187-4](https://doi.org/10.1016/S1352-2310(00)00187-4), 2000.
- Streets, D. G., Bond, T. C., Carmichael, G. R., Fernandes, S. D., Fu, Q., He, D., Klimont, Z., Nelson, S. M., Tsai, N. Y., Wang, M. Q., Woo, J.-H., and Yarber, K. F.: An inventory of gaseous and primary aerosol emissions in Asia in the year 2000, *J. Geophys. Res.*, 108, 8809, <https://doi.org/10.1029/2002JD003093>, 2003.

- Streets, D. G., Zhang, Q., Wang, L., He, K., Hao, J., Wu, Y., Tang, Y., and Carmichael, G. R.: Revisiting China's CO  
215 emissions after the Transport and Chemical Evolution over the Pacific (TRACE-P) mission: Synthesis of inventories,  
atmospheric modeling, and observations, 111, D14306, <https://doi.org/10.1029/2006JD007118>, 2006.
- Sugiyama, T., Nansai, K., Tohno, S., and Yamamoto, K.: Compilation and application of a primary PM<sub>2.5</sub> emissions  
inventory with high sectoral resolution in Japan, *Atmos. Environ.*, 43, 759–768,  
<https://doi.org/10.1016/j.atmosenv.2008.11.003>, 2009.
- 220 Sun, W., Shao, M., Granier, C., Liu, Y., Ye, C. S., and Zheng, J. Y.: Long-term trends of anthropogenic SO<sub>2</sub>, NO<sub>x</sub>, CO, and  
NMVOCs emissions in China, *Earth's Future*, 6, 1112–1133, <https://doi.org/10.1029/2018EF000822>, 2018.
- Venkataraman, C., Brauer, M., Tibrewal, K., Sadavarte, P., Ma, Q., Cohen, A., Chaliyakunnel, S., Frostad, J., Klimont, Z.,  
Martin, R. V., Millet, D. B., Philip, S., Walker, K., and Wang, S.: Source influence on emission pathways and ambient  
PM<sub>2.5</sub> pollution over India (2015–2050), *Atmos. Chem. Phys.*, 18, 8017–8039, [https://doi.org/10.5194/acp-18-8017-](https://doi.org/10.5194/acp-18-8017-2018)  
225 2018, 2018.
- Wang, S. X., Zhao, B., Cai, S. Y., Klimont, Z., Nielsen, C. P., Morikawa, T., Woo, J. H., Kim, Y., Fu, X., Xu, J. Y., Hao, J.  
M., and He, K. B.: Emission trends and mitigation options for air pollutants in East Asia, *Atmos. Chem. Phys.*, 14,  
6571–6603, <https://doi.org/10.5194/acp-14-6571-2014>, 2014.
- Wei, W., Wang, S., Chatani, S., Klimont, Z., Cofala, J., and Hao, J.: Emission and speciation of non-methane volatile  
230 organic compounds from anthropogenic sources in China, *Atmos. Environ.*, 42, 4976–4988,  
<https://doi.org/10.1016/j.atmosenv.2008.02.044>, 2008.
- Xia, Y., Zhao, Y., and Nielsen, C. P.: Benefits of China's efforts in gaseous pollutant control indicated by the bottom-up  
emissions and satellite observations 2000–2014, 136, 43–53, <https://doi.org/10.1016/j.atmosenv.2016.04.013>, 2016.
- Zhang, Q., Streets, D. G., Carmichael, G. R., He, K. B., Huo, H., Kannari, A., Klimont, Z., Park, I. S., Reddy, S., Fu, J. S.,  
235 Chen, D., Duan, L., Lei, Y., Wang, L. T., and Yao, Z. L.: Asian emissions in 2006 for the NASA INTEX-B mission,  
*Atmos. Chem. Phys.*, 9, 5131–5153, <https://doi.org/10.5194/acp-9-5131-2009>, 2009.
- Zhao, Y., Nielsen, C. P., Lei, Y., McElroy, M. B., and Hao, J.: Quantifying the uncertainties of a bottom-up emission  
inventory of anthropogenic atmospheric pollutants in China, *Atmos. Chem. Phys.*, 11, 2295–2308,  
<https://doi.org/10.5194/acp-11-2295-2011>, 2011.
- 240 Zhao, Y., Nielsen, C. P., McElroy, M. B., Zhang, L., and Zhang, J.: CO emissions in China: uncertainties and implications of  
improved energy efficiency and emission control, *Atmos. Environ.*, 49, 103–113,  
<https://doi.org/10.1016/j.atmosenv.2011.12.015>, 2012.
- Zhao, Y., Zhang, J., and Nielsen, C. P.: The effects of recent control policies on trends in emissions of anthropogenic  
atmospheric pollutants and CO<sub>2</sub> in China, *Atmos. Chem. Phys.*, 13, 487–508, <https://doi.org/10.5194/acp-13-487-2013>,  
245 2013.

- Zheng, B., Tong, D., Li, M., Liu, F., Hong, C., Geng, G., Li, H., Li, X., Peng, L., Qi, J., Yan, L., Zhang, Y., Zhao, H., Zheng, Y., He, K., and Zhang, Q.: Trends in China's anthropogenic emissions since 2010 as the consequence of clean air actions, *Atmos. Chem. Phys.*, 18, 14095–14111, <https://doi.org/10.5194/acp-18-14095-2018>, 2018.
- 250 Zheng, B., Chevallier, F., Yin, Y., Ciais, P., Fortems-Cheiney, A., Deeter, M. N., Parker, R. J., Wang, Y., Worden, H. M., and Zhao, Y.: Global atmospheric carbon monoxide budget 2000–2017 inferred from multi-species atmospheric inversions, *Earth Syst. Sci. Data*, 11, 1411–1436, <https://doi.org/10.5194/essd-11-1411-2019>, 2019.
