# Supplementary material for: Long-term historical trends in air pollutant emissions in Asia: Regional Emission inventory in ASia (REAS) version 3
Source: Copernicus journal article supplement (doi:10.5194/acp-20-12761-2020), 2020-11-04
Supplement: Supplementary file 1 [file acp-20-12761-2020-supplement.zip › Kurokawa_and_Ohara_Supplement/Kurokawa_and_Ohara_Supplement_Methodology.pdf]

*Supplement of*

**Long-term historical trends in air pollutant emissions in Asia: Regional Emission inventory in ASia (REAS) version 3**

**Junichi Kurokawa and Toshimasa Ohara**

*Correspondence to:* Junichi Kurokawa (kurokawa@acap.asia)

**Supplementary information and data related to methodology of REASv3**

# Contents

|                                                                                             |            |
|---------------------------------------------------------------------------------------------|------------|
| <b>S1. Introduction</b>                                                                     | <b>001</b> |
| <b>S2. Framework of REASv3</b>                                                              | <b>002</b> |
| S2.1 Target species                                                                         | 002        |
| S2.2 Target years                                                                           | 003        |
| S2.3 Target countries and regions                                                           | 003        |
| S2.4 Target emission sources                                                                | 006        |
| S2.4.1 Combustion sources                                                                   | 006        |
| S2.4.2 Non-combustion sources: Industrial production and other transformation               | 008        |
| S2.4.3 Non-combustion sources of NMVOC                                                      | 010        |
| S2.4.4 Non-combustion sources of NH <sub>3</sub>                                            | 011        |
| S2.5 Spatial and temporal resolution                                                        | 012        |
| <b>S3. Stationary combustion</b>                                                            | <b>013</b> |
| S3.1 Activity data                                                                          | 013        |
| S3.1.1 Definition of fuel types                                                             | 013        |
| S3.1.2 Data sources of fuel consumption and assumptions to estimate missing historical data | 015        |
| S3.1.3 Regional fuel consumption data in China                                              | 024        |
| S3.1.4 Regional fuel consumption data in India                                              | 029        |
| S3.1.5 Regional fuel consumption data in Japan                                              | 030        |
| S3.1.6 Fuel consumption in power plants                                                     | 031        |
| S3.1.7 Fuel consumption in non-metallic minerals                                            | 032        |
| S3.1.8 Biofuels                                                                             | 033        |
| S3.2 Emission factors and settings of emission controls                                     | 034        |

|                                                             |            |
|-------------------------------------------------------------|------------|
| S3.2.1 SO <sub>2</sub>                                      | 034        |
| S3.2.2 NO <sub>x</sub>                                      | 040        |
| S3.2.3 CO                                                   | 045        |
| S3.2.4 PM species                                           | 048        |
| S3.2.5 Other species and sources                            | 055        |
| <b>S4. Stationary non-combustion: Industrial production</b> | <b>057</b> |
| S4.1 Activity data                                          | 057        |
| S4.1.1 Iron and steel production                            | 057        |
| S4.1.2 Non-ferrous metal production                         | 058        |
| S4.1.3 Cement production                                    | 058        |
| S4.1.4 Lime production                                      | 059        |
| S4.1.5 Brick production                                     | 059        |
| S4.1.6 Sulphuric acid production                            | 060        |
| S4.1.7 Carbon black production                              | 060        |
| S4.1.8 Other transformation sectors                         | 061        |
| S4.2 Emission factors and settings of emission controls     | 061        |
| S4.2.1 Iron and steel production                            | 061        |
| S4.2.2 Non-ferrous metal production                         | 063        |
| S4.2.3 Cement production                                    | 064        |
| S4.2.4 Lime production                                      | 065        |
| S4.2.5 Brick production                                     | 066        |
| S4.2.6 Sulphuric acid production                            | 066        |
| S4.2.7 Carbon black production                              | 067        |
| S4.2.8 Other transformation sectors                         | 067        |

|                                                    |            |
|----------------------------------------------------|------------|
| S4.2.9 Speciation of NMVOC emissions               | 069        |
| <b>S5. Non-combustion sources of NMVOC</b>         | <b>070</b> |
| S5.1 Activity data                                 | 070        |
| S5.1.1 Extraction processes                        | 070        |
| S5.1.2 Solvent use                                 | 071        |
| S5.1.3 Printing                                    | 074        |
| S5.1.4 Paint application                           | 075        |
| S5.1.5 Chemical industry                           | 076        |
| S5.1.6 Other industry                              | 078        |
| S5.1.7 Waste disposal                              | 079        |
| S5.2 Emission factors                              | 080        |
| S5.2.1 Extraction processes                        | 080        |
| S5.2.2 Solvent use                                 | 081        |
| S5.2.3 Printing                                    | 082        |
| S5.2.4 Paint application                           | 082        |
| S5.2.5 Chemical industry                           | 083        |
| S5.2.6 Other industry                              | 084        |
| S5.2.7 Waste disposal                              | 085        |
| S5.2.8 Speciation of NMVOC emissions               | 085        |
| S5.3 Other emission inventories included in REASv3 | 085        |
| S5.3.1 Japan                                       | 085        |
| S5.3.2 Republic of Korea                           | 088        |
| <b>S6. Road transport</b>                          | <b>089</b> |
| S6.1 Activity data                                 | 089        |

|                                                     |            |
|-----------------------------------------------------|------------|
| S6.1.1 Annual mileage                               | 089        |
| S6.1.2 Fuel consumption                             | 102        |
| S6.2 Emission factors for exhaust emissions         | 102        |
| S6.2.1 NO <sub>x</sub> , CO, NMVOC, and PM species  | 102        |
| S6.2.2 NH <sub>3</sub>                              | 112        |
| S6.2.3 SO <sub>2</sub> and CO <sub>2</sub>          | 112        |
| S6.2.4 Japan                                        | 115        |
| S6.3 Evaporative emissions                          | 117        |
| S6.4 Speciation of NMVOC emissions                  | 118        |
| <b>S7. Other transport</b>                          | <b>119</b> |
| S7.1 Sub-sectors included in REASv3                 | 119        |
| S7.2 Activity data                                  | 119        |
| S7.3 Emission factors                               | 119        |
| S7.4 Speciation of NMVOC emissions                  | 120        |
| <b>S8. Non-combustion sources of NH<sub>3</sub></b> | <b>121</b> |
| S8.1 Manure management                              | 121        |
| S8.1.1 Methodology                                  | 121        |
| S8.1.2 Activity data                                | 121        |
| S8.1.3 Emission factors                             | 122        |
| S8.1.4 Monthly allocation factors                   | 122        |
| S8.1.5 Japan                                        | 122        |
| S8.2 Fertilizer application                         | 123        |
| S8.2.1 Methodology                                  | 123        |
| S8.2.2 Activity data                                | 123        |

|                                                   |            |
|---------------------------------------------------|------------|
| S8.2.3 Emission factors                           | 124        |
| S8.2.4 Monthly allocation factors                 | 125        |
| S8.2.5 Japan                                      | 125        |
| S8.3 Industrial production                        | 126        |
| S8.4 Human                                        | 127        |
| S8.5 Latrines                                     | 127        |
| <b>S9. Spatial and temporal distribution</b>      | <b>128</b> |
| S9.1 Grid allocation factors                      | 128        |
| S9.1.1 Population distribution                    | 128        |
| S9.1.2 Power plants                               | 128        |
| S9.1.3 Iron and steel industry                    | 128        |
| S9.1.4 Cement industry                            | 129        |
| S9.1.5 Road transport                             | 129        |
| S9.1.6 Domestic sectors                           | 130        |
| S9.1.7 Others                                     | 131        |
| S9.2 Monthly variation factors                    | 132        |
| S9.2.1 Power plants                               | 132        |
| S9.2.2 Industry                                   | 133        |
| S9.2.3 Road transport                             | 139        |
| S9.2.4 Residential combustion                     | 139        |
| S9.2.5 Others                                     | 140        |
| <b>S10. Uncertainties</b>                         | <b>141</b> |
| S10.1 Methodology                                 | 141        |
| S10.2 Settings of uncertainties of each component | 141        |

|                                                                                           |            |
|-------------------------------------------------------------------------------------------|------------|
| S10.2.1 Stationary combustion sources                                                     | 142        |
| S10.2.2 Stationary non-combustion sources: Industrial production and other transformation | 147        |
| S10.2.3 Non-combustion sources of NMVOC                                                   | 150        |
| S10.2.4 Road transport                                                                    | 153        |
| S10.2.5 Other transport                                                                   | 155        |
| S10.2.6 Non-combustion sources of NH <sub>3</sub>                                         | 155        |
| <b>References</b>                                                                         | <b>157</b> |

## **S1. Introduction**

This document provides detailed information related to methodologies of Regional Emission inventory in ASia (REAS) version 3 (hereafter REASv3 in this document) developed as a supplementary material of the main manuscript entitled “Long-term historical trends in air pollutant emissions in Asia: Regional Emission inventory in ASia (REAS) version 3”. In this document, first and second versions of REAS are often cited and expressed as REASv1 (Ohara et al., 2007) and REASv2 (Kurokawa et al., 2013), respectively. The framework of REASv3 such as target species, countries and regions, and emission sources was summarized in Sect. 2. Sects. 3, 4, 5, 6, and 7 provide details of activity data and emission factors including settings of emission controls for stationary combustion, industrial production, non-combustion sources of NMVOC, road transport, and other transport, respectively. The details related to methodology for non-combustion sources of NH<sub>3</sub> were given in Sect. 8. Grid allocation and monthly variation factors for spatial and temporal distribution were described in Sect. 9. In Sect. 10, details of methodology and settings for estimation of uncertainties were provided.

Note that this document is for REASv3.2 which is an updated version of REASv3.1 (Kurokawa et al., 2019). The differences between REASv3.2 and REASv3.1 and causes of the discrepancies were provided in another document entitled “Differences between REASv3.2 and REASv3.1” developed as an additional supplement of the main manuscript.

## S2. Framework of REASv3

### S2.1 Target species

Target species of REASv3 are summarized in Table 2.1. In REASv3, NMVOC species were divided into 19 chemical species categories as presented in Table 2.2. Codes of each species used in emission tables and gridded data of REASv3 are also provided in the tables.

**Table 2.1.** Target species of REASv3.

| Species code | Species                                |
|--------------|----------------------------------------|
| SO2          | Sulfur dioxide                         |
| NOX          | Nitrogen oxides (as NO <sub>2</sub> )  |
| CO_          | Carbon monoxide                        |
| NMV          | Non-methane volatile organic compounds |
| NH3          | Ammonia                                |
| CO2          | Carbon dioxide                         |
| PM10_        | Primary PM <sub>10</sub>               |
| PM2.5        | Primary PM <sub>2.5</sub>              |
| BC_          | Black carbon                           |
| OC_          | Primary organic carbon                 |

**Table 2.2.** NMVOC species categories defined in REASv3.

| Species number code | NMVOC species    |
|---------------------|------------------|
| 01                  | Ethane           |
| 02                  | Propane          |
| 03                  | Butanes          |
| 04                  | Pentanes         |
| 05                  | Other alkanes    |
| 06                  | Ethylene         |
| 07                  | Propene          |
| 08                  | Terminal alkenes |
| 09                  | Internal alkenes |
| 10                  | Acetylene        |
| 11                  | Benzene          |
| 12                  | Toluene          |
| 13                  | Xylenes          |

|    |                 |
|----|-----------------|
| 14 | Other aromatics |
| 15 | Formaldehyde    |
| 16 | Other aromatics |
| 17 | Ketones         |
| 18 | Halocarbons     |
| 19 | Others          |
| 20 | Total           |

## S2.2 Target years

Target years of REASv3 are 1950-2015 (each year). In future updated versions, the oldest target year is basically fixed, but data in later years (after 2016) are planned to be added.

## S2.3 Target countries and regions

Table 2.3 provides list of countries and sub-regions included in the inventory domain of REASv3. Codes of region, countries, and sub-regions used in the main manuscript, emission tables and gridded data of REASv3 are also provided in the table.

**Table 2.3.** Region, country, and sub-region included in the inventory domain of REASv3 with codes used in the main manuscript and files of emission tables and gridded data provided from the REAS website (<https://www.nies.go.jp/REAS/>).

| Region name/<br>Region code | Country name: Sub-region name | Country and<br>sub-region code<br>CCCRR<br>CCC: Country code<br>RR: Sub-region code |
|-----------------------------|-------------------------------|-------------------------------------------------------------------------------------|
| China/<br>CHN               | China: Whole Country          | CHNWC                                                                               |
|                             | China: Beijing                | CHNBJ                                                                               |
|                             | China: Tianjin                | CHNTJ                                                                               |
|                             | China: Hebei                  | CHNHE                                                                               |
|                             | China: Shanxi                 | CHNSX                                                                               |
|                             | China: Inner Mongolia         | CHNNM                                                                               |
|                             | China: Liaoning               | CHNLN                                                                               |
|                             | China: Jilin                  | CHNJL                                                                               |
|                             | China: Heilongjiang           | CHNHL                                                                               |

|               |                                                                                                   |       |
|---------------|---------------------------------------------------------------------------------------------------|-------|
|               | China: Shanghai                                                                                   | CHNSH |
|               | China: Jiangsu                                                                                    | CHNJS |
|               | China: Zhejiang                                                                                   | CHNZJ |
|               | China: Anhui                                                                                      | CHNAH |
|               | China: Fujian                                                                                     | CHNFJ |
|               | China: Jiangxi                                                                                    | CHNJX |
|               | China: Shandong                                                                                   | CHNSD |
|               | China: Henan                                                                                      | CHNHA |
|               | China: Hubei                                                                                      | CHNHB |
|               | China: Hunan                                                                                      | CHNHN |
|               | China: Guangdong                                                                                  | CHNGD |
|               | China: Guangxi                                                                                    | CHNGX |
|               | China: Hainan                                                                                     | CHNHI |
|               | China: Chongqing                                                                                  | CHNCQ |
|               | China: Sichuan                                                                                    | CHNSC |
|               | China: Guizhou                                                                                    | CHNGZ |
|               | China: Yunnan                                                                                     | CHNYN |
|               | China: Tibet                                                                                      | CHNXZ |
|               | China: Shaanxi                                                                                    | CHNSN |
|               | China: Gansu                                                                                      | CHNGS |
|               | China: Qinghai                                                                                    | CHNQH |
|               | China: Ningxia                                                                                    | CHNNX |
|               | China: Xinjiang                                                                                   | CHNXJ |
|               | China: Hong Kong                                                                                  | CHNHK |
|               | China: Macau                                                                                      | CHNMC |
| India/<br>IND | India: Whole Country                                                                              | INDWC |
|               | India: Andhra Pradesh                                                                             | INDAP |
|               | India: Bihar, Jharkhand                                                                           | INDBJ |
|               | India: North East (Arunachal Pradesh/Assam/Manipur/<br>Meghalaya/Mizoram/Nagaland/Sikkim/Tripura) | INDAN |
|               | India: Gujarat                                                                                    | INDGU |
|               | India: Haryana                                                                                    | INDHA |
|               | India: Karnataka/Goa                                                                              | INDKG |
|               | India: Kerala                                                                                     | INDKE |
|               | India: Madhya Pradesh/Chhattisgarh                                                                | INDMC |

|                          |                                                                                                       |       |
|--------------------------|-------------------------------------------------------------------------------------------------------|-------|
|                          | India: Maharashtra                                                                                    | INDMA |
|                          | India: Orissa                                                                                         | INDOR |
|                          | India: Punjab/Chandigarh                                                                              | INDPU |
|                          | India: Rajasthan                                                                                      | INDRA |
|                          | India: Tamil Nadu                                                                                     | INDTN |
|                          | India: Utter Pradesh/Uttaranchal                                                                      | INDUU |
|                          | India: West Bengal                                                                                    | INDWB |
|                          | India: Himachal Pradesh/Jammu and Kashmir                                                             | INDHJ |
|                          | India: Delhi                                                                                          | INDDE |
| Japan/<br>JPN            | Japan: Whole Country                                                                                  | JPNWC |
|                          | Japan: Hokkaido-Tohoku (Hokkaido/Aomori/Iwate/<br>Miyagi/Akita/Yamagata/Fukukshima)                   | JPNHT |
|                          | Japan: Kanto (Ibaraki/Tochigi/Gunma/Saitama/Chiba/<br>Tokyo/Kanagawa)                                 | JPNKN |
|                          | Japan: Chubu (Niigata/Toyama/Ishikawa/Fukui/<br>Yamanashi/Nagano/Gifu/Shizuoka/Aichi)                 | JPNCB |
|                          | Japan: Kinki (Mie/Shiga/Kyoto/Osaka/Hyogo/Nara/<br>Wakayama)                                          | JPNKK |
|                          | Japan: Chugoku-Shikoku (Tottori/Shimane/Okayama/<br>Hiroshima/Yamaguchi/Tokushima/Kagawa/Ehime/Kochi) | JPNCS |
|                          | Japan: Kyushu-Okinawa (Fukuoka/Saga/Nagasaki/<br>Kumamoto/Oita/Miyazaki/Kagoshima/Okinawa)            | JPNKO |
|                          |                                                                                                       |       |
| Other East Asia /<br>OEA | Democratic People's Republic of Korea, Whole Country                                                  | PRKWC |
|                          | Republic of Korea, Whole Country                                                                      | KORWC |
|                          | Mongolia: Whole Country                                                                               | MNGWC |
|                          | Taiwan: Whole Country                                                                                 | TWNWC |
| Southeast Asia/<br>SEA   | Brunei: Whole Country                                                                                 | BRNWC |
|                          | Cambodia: Whole Country                                                                               | KHMWC |
|                          | Indonesia: Whole Country                                                                              | IDNWC |
|                          | Laos: Whole Country                                                                                   | LAOWC |
|                          | Malaysia: Whole Country                                                                               | MYSWC |
|                          | Myanmar: Whole Country                                                                                | MMRWC |
|                          | Philippines: Whole Country                                                                            | PHLWC |
|                          | Singapore: Whole Country re                                                                           | SGPWC |
|                          | Thailand: Whole Country                                                                               | THAWC |

|                          |                            |       |
|--------------------------|----------------------------|-------|
|                          | Vietnam: Whole Country     | VNMWC |
| Other South Asia/<br>OSA | Afghanistan: Whole Country | AFGWC |
|                          | Bangladesh: Whole Country  | BGDWC |
|                          | Bhutan: Whole Country      | BTNWC |
|                          | Maldives: Whole Country    | MDVWC |
|                          | Nepal: Whole Country       | NPLWC |
|                          | Pakistan: Whole Country    | PAKWC |
|                          | Sri Lanka: Whole Country   | LKAWC |

## S2.4 Target emission sources

### S2.4.1 Combustion sources

Table 2.4 provides list of sub-sector categories of combustion sources defined in REASv3. Aggregated sector categories used in the main manuscript and emission tables of REASv3 are presented as “Sector code”. IEA codes show relationships between sub-sector categories of REASv3 and the International Energy Agency (IEA) World Energy Balances (IEAWEB) (IEA, 2017). Fuel types defined in REASv3 are provided in Sect S3.1.1. See Sects. S3, S6, and S7 for details of stationary combustion, road transport, and other transport sectors, respectively.

Several emission sources related to transformation sectors except for power plants were included in Table 2.4. Sources categorized as energy sectors in IEAWEB are only considered as combustion sources. For coke ovens (not as the energy sector), emissions were estimated based on coal input for SO<sub>2</sub> and NO<sub>x</sub> and coke production for CO, NMVOC, CO<sub>2</sub>, and PM species. In REASv3, for coke ovens as energy transformation sectors, contributions from both combustion and non-combustion processes were included in the emissions. In other words, their emissions were not estimated separately. Similarly, the following sources include both combustion and non-combustion emissions which were not estimated separately:

- Charcoal production plants
- Manufacture of other solid fuels
- Gas works

In addition, CO emissions from pig iron, crude steel, and sinter production for all countries, those from brick production except for China, Japan, Republic of Korea, and Taiwan, emissions of PM species from sinter and pig iron production for China, and those from brick production for all countries estimated based on their production amounts include contributions from both combustion and non-combustion sources (not estimated separately).

**Table 2.4.** Sub-sector categories of combustion sources considered in REASv3 with sector codes used in the main manuscript and emission tables of REASv3 and IEA codes showing relationships between sub-sector categories of REASv3 and the IEAWEB.

| Sector code         | Sub-sector category                         | IEA code                                                                          |
|---------------------|---------------------------------------------|-----------------------------------------------------------------------------------|
| Power Plants/<br>PP | Power plants (point sources/area sources)   | MAINELEC/AUTOELEC/<br>MAINCHP/AUTOCHP/<br>MAINHEAT/AUTOHEAT/<br>THEA/TBOILER/TELE |
|                     | Power plants (energy)                       | EPOWERPLT                                                                         |
| Industry/<br>IND    | Coke ovens                                  | TCOKEOVS                                                                          |
|                     | Charcoal production plants                  | TCHARCOAL                                                                         |
|                     | Manufacture of other solid fuels            | TPATFUEL/TBKB/TNONSPEC                                                            |
|                     | Coke ovens (energy)                         | ECOKEOVS                                                                          |
|                     | Charcoal production plants (energy)         | ECHARCOAL                                                                         |
|                     | Manufacture of other solid fuels (energy)   | EMINES/EPATFUEL/EBKB/<br>ENONSPEC                                                 |
|                     | Petroleum refineries (energy)               | EREFINER                                                                          |
|                     | Manufacture of other liquid fuels (energy)  | EOILGASEX/ECOALLIQ/EGTL                                                           |
|                     | Gas works                                   | TGASWKS                                                                           |
|                     | Gas works (energy)                          | EGASWKS                                                                           |
|                     | Manufacture of other gaseous fuels (energy) | ELNG/EGTL                                                                         |
|                     | Chemical and petrochemical industry         | CHEMICAL                                                                          |
|                     | Iron and steel industry                     | IRONSTL                                                                           |
|                     | Blast furnace                               | TBLASTFUR                                                                         |
|                     | Blast furnace (energy)                      | EBLASTFUR                                                                         |
|                     | Non-ferrous metal industry                  | NONFERR                                                                           |
|                     | Cement industry                             | NONMET                                                                            |
|                     | Lime industry                               |                                                                                   |
|                     | Brick industry                              |                                                                                   |
|                     | Other non-metallic minerals industries      |                                                                                   |
|                     | Construction industry                       | CONSTRUC                                                                          |
|                     | Transport equipment industry                | TRANSEQ                                                                           |
|                     | Machinery industry                          | MACHINE                                                                           |
|                     | Mining and quarrying industry               | MINING                                                                            |
|                     | Food and tobacco industry                   | FOODPRO                                                                           |

|                          |                                   |          |
|--------------------------|-----------------------------------|----------|
|                          | Paper, pulp and printing industry | PAPERPRO |
|                          | Wood and wood products industry   | WOODPRO  |
|                          | Textile and leather industry      | TEXTILES |
|                          | Other industries                  | INONSPEC |
| Road transport/<br>ROAD  | Road transport                    | ROAD     |
| Other transport/<br>OTRA | Rail                              | RAIL     |
|                          | Pipeline transport                | PIPLINE  |
|                          | Other transport* <sup>1</sup>     | TRNONSPE |
| Residential/<br>RESI     | Residential                       | RESIDENT |
| Other domestic/<br>ODOM  | Commercial and public services    | COMMPUB  |
|                          | Agriculture* <sup>2</sup>         | AGRICULT |
|                          | Others                            | ONONSPEC |

\*<sup>1</sup>Aviation and navigation (both for domestic and international) are not included.

\*<sup>2</sup>Forestry is included, but fishing is not included.

#### S2.4.2 Non-combustion sources: Industrial production and other transformation

Table 2.5 provides list of sub-sector categories of non-combustion sources defined in REASv3 with target species and notes for each sub-sector category. See Sect. S4 for details of industrial processes and other transformation. See Sects. S5 and S8 for industrial processes related to NMVOC and NH<sub>3</sub>, respectively. Note that, as described in Sect S2.4.1, non-combustion emissions from coke production, those of CO from pig iron, crude steel, and sinter productions (for all countries and regions) and from brick production (except for China, Japan, Republic of Korea, and Taiwan), and those of PM species from sinter and pig iron production (for China) and from brick production (for all countries) were not estimated separately. For these sources, estimated emission in REASv3 include contributions from both combustion and non-combustion processes.

**Table 2.5.** Sub-sector categories of non-combustion sources from industrial production and other transformation considered in REASv3.

| Sub-sector category    | Target species        | Notes                   |
|------------------------|-----------------------|-------------------------|
| Pig iron production    | CO, PM species        | Iron and steel industry |
| Crude steel production | CO, NMVOC, PM species |                         |

|                              |                                            |                                                                                                                            |
|------------------------------|--------------------------------------------|----------------------------------------------------------------------------------------------------------------------------|
| Sinter production            | CO, PM species                             |                                                                                                                            |
| Rolled steel production      | NMVOC                                      |                                                                                                                            |
| Copper production            | SO <sub>2</sub> , PM species               | Non-ferrous metal industry                                                                                                 |
| Zinc production              | SO <sub>2</sub> , PM species               |                                                                                                                            |
| Lead production              | SO <sub>2</sub> , PM species               |                                                                                                                            |
| Almina production            | SO <sub>2</sub> , PM species               |                                                                                                                            |
| Aluminium production         | SO <sub>2</sub> , PM species               |                                                                                                                            |
| Cement production            | CO <sub>2</sub> , PM species               | Non-metallic minerals industry                                                                                             |
| Lime production              | CO <sub>2</sub> , PM species               |                                                                                                                            |
| Brick production             | PM species                                 |                                                                                                                            |
| Sulphuric acid production    | SO <sub>2</sub>                            | Inorganic chemicals industry                                                                                               |
| Carbon black production      | NMVOC, PM species                          |                                                                                                                            |
| Ethylene production          | NMVOC                                      | Organic chemicals industry                                                                                                 |
| Polyethylene production      | NMVOC                                      |                                                                                                                            |
| Styrene production           | NMVOC                                      |                                                                                                                            |
| Polystyrene production       | NMVOC                                      |                                                                                                                            |
| Polyvinylchloride production | NMVOC                                      |                                                                                                                            |
| Propylene production         | NMVOC                                      |                                                                                                                            |
| Polypropylene production     | NMVOC                                      |                                                                                                                            |
| Polyvinylchloride processing | NMVOC                                      |                                                                                                                            |
| Polystyrene processing       | NMVOC                                      |                                                                                                                            |
| Bread production             | NMVOC                                      | Other industries considered for<br>NMVOC                                                                                   |
| Beer production              | NMVOC                                      |                                                                                                                            |
| Asphalt production           | NMVOC                                      |                                                                                                                            |
| Pulp and paper production    | NMVOC                                      |                                                                                                                            |
| Ammonia                      | NH <sub>3</sub>                            | Synthetic fertilizer industry considered<br>for NH <sub>3</sub>                                                            |
| Ammonium nitrate             | NH <sub>3</sub>                            |                                                                                                                            |
| Urea                         | NH <sub>3</sub>                            |                                                                                                                            |
| Coke production              | CO, NMVOC, CO <sub>2</sub> ,<br>PM species | Manufacture of solid fuels                                                                                                 |
| Petroleum refineries         | SO <sub>2</sub> , NMVOC, PM<br>species     | Manufacture of liquid fuels<br><br>For NMVOC, contributions were<br>included in extraction processes. See<br>Sect. S2.4.3. |

### S2.4.3 Non-combustion sources of NMVOC

Non-combustion sources for NMVOC emissions considered in REASv3 are extraction processes, solvent use, industrial processes, waste disposal and evaporative emissions from road vehicles. Sub-categories of extraction processes and solvent use are summarized in Tables 2.6 and 2.7, respectively. Definitions of the sub-sectors are the same as with those of Klimont et al. (2002a). See Table 2.5, Sects. S5.1.7 and S6.3 for industrial processes, waste disposal, and evaporative emissions from road vehicles, respectively. See Sect. S5 for details of non-combustion sources of NMVOC.

**Table 2.6.** Sub-sector categories of extraction processes considered in REASv3.

| Sub-category                      |
|-----------------------------------|
| Gas production                    |
| Gas distribution                  |
| Crude oil production              |
| Crude oil handling                |
| Petroleum refineries <sup>a</sup> |
| Service station                   |
| Transport and depots              |

a. Except for NMVOC, contributions were included in industrial processes. See Sect. S2.4.2.

**Table 2.7.** Sub-sector categories of solvent use considered in REASv3.

| Sub-category                   |
|--------------------------------|
| Dry cleaning                   |
| Decreasing operation           |
| Vehicle treatment              |
| Domestic use of solvents       |
| Asphalt blowing                |
| Paint production               |
| Ink production                 |
| Tire production                |
| Synthetic rubber production    |
| Textile industry               |
| Preservation of wood           |
| Adhesive application           |
| Printing <sup>a</sup>          |
| Paint application <sup>b</sup> |

a. Contributions from following activities were included: packing, offset printing, publication, and screen printing. b. Contributions from following purposes were included: architecture, domestic usage, automobile manufacture, vehicle refinishing, and other industrial application.

#### **S2.4.4 Non-combustion sources of NH<sub>3</sub>**

Non-combustion sources of NH<sub>3</sub> emissions considered in REASv3 are manure management of livestock, fertilizer application, industrial processes, human, and latrines as summarized in Table 2.8. See Sect. S8 for details of non-combustion sources of NH<sub>3</sub>.

**Table 2.8.** Sub-sector categories of non-combustion sources of NH<sub>3</sub> considered in REASv3.

| Sub-category                        |
|-------------------------------------|
| Manure management <sup>a</sup>      |
| Fertilizer application <sup>b</sup> |
| Industrial processes <sup>c</sup>   |
| Human <sup>d</sup>                  |
| Latrines                            |

a. Contributions from manure management including housing, storage and yards were included. Those from manure applied to soils were included in fertilizer application. b. Contributions from both synthetic fertilizer and animal manure used as fertilizer were included. c. See Sect. S2.4.2. d. Contributions from perspiration and respiration were included.

## S2.5 Spatial and temporal resolution

In REASv3, only large power plants are treated as point sources and gridded data of other emission sources are provided with a horizontal resolution of  $0.25^\circ \times 0.25^\circ$ . For temporal resolution, monthly emissions are estimated in REASv3 by allocating annual emissions to each month using monthly proxy data. Details of methodologies and data used for spatial and temporal allocation are described in Sect. S9.

Table 2.9 provides sub-sector categories included in aggregated sector codes for gridded data in REASv3.

**Table 2.9.** Sector codes for gridded data in REASv3 and sub-sector categories included in each code.

| Sector categories code              | Sub-sector categories included in each sector code                                                                                                 |
|-------------------------------------|----------------------------------------------------------------------------------------------------------------------------------------------------|
| POWER_PLANTS_POINT                  | Power plants (points) in Table 2.4                                                                                                                 |
| POWER_PLANTS_NON-POINT <sup>a</sup> | Power plants (area sources and energy) in Table 2.4                                                                                                |
| INDUSTRY <sup>a</sup>               | Combustion sources of industry sector in Table 2.4<br>Non-combustion sources of industrial production and other transformation sector in Table 2.5 |
| ROAD_TRANSPORT                      | Road transport sector in Table 2.4<br>Evaporative NMVOC emissions from road vehicles described in Sect. S6.3                                       |
| OTHER_TRANSPORT                     | Other transport sector in Table 2.4                                                                                                                |
| DOMESTIC <sup>a</sup>               | Residential and other domestic sectors in Table 2.4                                                                                                |
| EXTRACTION                          | NMVOC emissions from extraction processes in Table 2.6                                                                                             |
| SOLVENTGS                           | NMVOC emissions from solvent use in Table 2.7                                                                                                      |
| WASTE                               | NMVOC emissions from waste disposal described in Sect. S5.1.7                                                                                      |
| MANURE_MANAGEMENT                   | NH <sub>3</sub> emissions from manure management described in Sect. S8.1                                                                           |
| FERTILIZER                          | NH <sub>3</sub> emissions from fertilizer application described in Sect. S8.2                                                                      |
| MISC                                | NH <sub>3</sub> emissions from human and latrines described in Sects. S8.4 and S8.5.                                                               |

a. For CO<sub>2</sub> gridded data of POWER\_PLANTS\_NON-POINT, INDUSTRY, and DOMESTIC, emissions excluding biofuel (-NON-BF) and those from biofuel (-BF) are provided separately.

### **S3. Stationary combustion**

#### **S3.1 Activity data**

##### **S3.1.1 Definition of fuel types**

Table 3.1 describes fuel types considered in stationary combustion sources of REASv3. Emissions of air pollutants were estimated individually for each fuel type. In Fig. 4 of the main manuscript and Figs. S2, S4, S6, S8, S10, and S12 of the supplement, fuel types are aggregated to several categories. Definition of the categories is also provided in Table 3.1. For each fuel type, definitions are mostly the same as those of the International Energy Agency (IEA) World Energy Balances (IEAWEB) (IEA, 2017). Exceptions are "Raw coal", "Cleaned coal", "Other washed coal", and "Other coking products" which are defined only for China in the China Energy Statistical Yearbook (CESY) (National Bureau of Statistics of China, 1986, 2001-2017). Definition of "Bituminous coal", "Kerosene", and "Diesel oil" in Table 3.1. is the same as that of "Other bituminous coal", "Other kerosene", and "Gas/diesel oil excl. biofuels" of IEAWEB, respectively. For hard (brown) coal, if there is no detailed information, corresponding fuel type is considered as "Bituminous coal" ("Lignite"). For other fuel types not included in Table 3.1, emissions from combustion were ignored in REASv3.

**Table 3.1.** List of detailed fuel types considered in REASv3 and definition of aggregated categories used in the main manuscript and the supplement.

| Aggregated categories<br>(code) | Aggregated categories<br>(description) | Detailed fuel types                                                                                                             |
|---------------------------------|----------------------------------------|---------------------------------------------------------------------------------------------------------------------------------|
| COAL                            | Primary coal                           | Coking coal<br>Anthracite<br>Bituminous coal<br>Raw coal<br>Cleaned coal<br>Other washed coal<br>Sub-bituminous coal<br>Lignite |
| DC                              | Secondary coal                         | Coke oven coke<br>Gas coke<br>Coal tar<br>Patent fuel<br>Brown coal briquettes (BKB)<br>Other coking products                   |
| NGAS                            | Natural gas                            | Natural gas                                                                                                                     |
| OGAS                            | Other gas fuels                        | Gas works gas<br>Coke oven gas<br>Blast furnace gas<br>Other recovered gases                                                    |
| LF                              | Light oil fuels                        | Refinery gas<br>Liquefied petroleum gas (LPG)<br>Natural gas liquids<br>Motor gasoline<br>Naphtha<br>Kerosene                   |
| MD                              | Diesel oil                             | Diesel oil                                                                                                                      |
| HF                              | Heavy oil fuels                        | Crude oil<br>Heavy fuel oil<br>Petroleum coke<br>Other oil products                                                             |
| BF                              | Biofuel                                | Fuelwood<br>Crop Residue                                                                                                        |

|     |             |                                 |
|-----|-------------|---------------------------------|
|     |             | Animal waste                    |
|     |             | Biogas                          |
|     |             | Biogasoline                     |
|     |             | Biodiesels                      |
|     |             | Charcoal                        |
| OTH | Other fuels | Municipal waste (renewable)     |
|     |             | Municipal waste (non-renewable) |
|     |             | Industrial waste                |

### S3.1.2 Data sources of fuel consumption and assumptions to estimate missing historical data

In REASv3, fuel consumption data were primarily obtained from IEAWEBS, CESY, the United Nations (UN) Energy Statistics Database (UN, 2016), and UN data, which is a web-based data service of the UN (<http://data.un.org/>). However, all these sources do not include data for the entire target period of REASv3, that is from 1950-2015. Furthermore, past data for sectors do not contain as many categories. In this sub-section, data sources and assumptions for estimating missing historical data used in REASv3 are summarized in Table 3.2 including how to distribute total or sub-total data to detailed sub-sectors and how to extrapolate data until 1950. Note that descriptions for fuel consumption data in transport sector are also included in this sub-section.

**Table. 3.2.** Data sources and assumptions for estimating missing historical data used in REASv3 for each country and region.

**(a) China**

|                                                    |                                                                                                                                                                                                                                                                                                                                                                                                                                                                                                                                                                                                                                                                                                                                                                                                                                                                                                                                                                                                                                                                                                                                                                                                                                                                                                                                                                                                                                                                                                                                                                           |
|----------------------------------------------------|---------------------------------------------------------------------------------------------------------------------------------------------------------------------------------------------------------------------------------------------------------------------------------------------------------------------------------------------------------------------------------------------------------------------------------------------------------------------------------------------------------------------------------------------------------------------------------------------------------------------------------------------------------------------------------------------------------------------------------------------------------------------------------------------------------------------------------------------------------------------------------------------------------------------------------------------------------------------------------------------------------------------------------------------------------------------------------------------------------------------------------------------------------------------------------------------------------------------------------------------------------------------------------------------------------------------------------------------------------------------------------------------------------------------------------------------------------------------------------------------------------------------------------------------------------------------------|
| Data sources and treatments                        | <ul style="list-style-type: none"><li>● Fuel consumption for each region except for Tibet, Hong Kong and Macau were obtained from CESY during 1985-2015 and those before 1984 were extrapolated to 1950 using data for whole China during 1950-2015. See Sect. S3.1.3 for regional fuel consumption data in China.</li><li>● Data of whole country were taken from IEAWEb during 1971-2015 and extrapolated to 1950. Those of Tibet were taken from REASv2 (based on GAINS ASIA at that time) during 2000-2008 and extrapolated using data of whole country. See (n) and (o) of this sub-section for Hong Kong and Macau, respectively.</li></ul>                                                                                                                                                                                                                                                                                                                                                                                                                                                                                                                                                                                                                                                                                                                                                                                                                                                                                                                         |
| Assumptions for estimating missing historical data | <ul style="list-style-type: none"><li>● Assumptions for modifying IEAWEb during 1971-2015 are as follows:<ul style="list-style-type: none"><li>➤ Energy industry own use sector:<ul style="list-style-type: none"><li>✧ Data of bituminous coal and natural gas before 1989 were distributed to sub-sectors based on relative ratios of fuel consumption data in 1990.</li><li>✧ Fuel consumption data of coke oven gas in 1990 were extrapolated to 1980 using trends of coke oven gas production in IEAWEb during 1980-1990 and then, extrapolated to 1971 based on trends of coke oven coke production in IEAWEb during 1971-1980.</li></ul></li><li>➤ Industry sector:<ul style="list-style-type: none"><li>✧ Data of coking coal, gas works gas, coke oven gas, refinery gas, and LPG/other bituminous coal and crude oil/natural gas, other kerosene, diesel oil, and heavy fuel oil before 1989/1984/1979 were distributed to sub-sectors based on relative ratios in 1990/1985/1980.</li><li>✧ Fuel consumption data of coke oven gas in 1980 were extrapolated to 1971 using trends of coke oven gas production in IEAWEb during 1971-1980.</li></ul></li><li>➤ Transport sector:<ul style="list-style-type: none"><li>✧ Data of diesel oil before 1989 were distributed to road transport, domestic navigation, and agriculture/forestry based on relative ratios of corresponding fuel consumption in 1990.</li></ul></li></ul></li><li>● See "Assumption for data extrapolation" in this sub-section how to extrapolate the data of IEAWEb to 1950.</li></ul> |

**(b) India**

|                                                    |                                                                                                                                                                                                                                         |
|----------------------------------------------------|-----------------------------------------------------------------------------------------------------------------------------------------------------------------------------------------------------------------------------------------|
| Data sources and treatments                        | <ul style="list-style-type: none"> <li>● Data of whole country were taken from IEAWEb during 1971-2015 and extrapolated to 1950.</li> <li>● See Sect. S3.1.4 for regional fuel consumption data in India.</li> </ul>                    |
| Assumptions for estimating missing historical data | <ul style="list-style-type: none"> <li>● No major modifications were done for IEAWEb during 1971-2015.</li> <li>● See "Assumption for data extrapolation" in this sub-section how to extrapolate the data of IEAWEb to 1950.</li> </ul> |

**(c) Japan**

|                                                    |                                                                                                                                                                                                                                                                                                                                                                                                                                                                                                                                                                                                                                                                                                                                                                                                                                                                                                                                                                                                                                                                                                                                                                                                                                                                                                                                                                                                                                                                                                                                                                                                                        |
|----------------------------------------------------|------------------------------------------------------------------------------------------------------------------------------------------------------------------------------------------------------------------------------------------------------------------------------------------------------------------------------------------------------------------------------------------------------------------------------------------------------------------------------------------------------------------------------------------------------------------------------------------------------------------------------------------------------------------------------------------------------------------------------------------------------------------------------------------------------------------------------------------------------------------------------------------------------------------------------------------------------------------------------------------------------------------------------------------------------------------------------------------------------------------------------------------------------------------------------------------------------------------------------------------------------------------------------------------------------------------------------------------------------------------------------------------------------------------------------------------------------------------------------------------------------------------------------------------------------------------------------------------------------------------------|
| Data sources and treatments                        | <ul style="list-style-type: none"> <li>● Data of whole country were taken from IEAWEb during 1960-2015 and extrapolated to 1950.</li> <li>● See Sect. S3.1.5 for regional fuel consumption data in Japan.</li> </ul>                                                                                                                                                                                                                                                                                                                                                                                                                                                                                                                                                                                                                                                                                                                                                                                                                                                                                                                                                                                                                                                                                                                                                                                                                                                                                                                                                                                                   |
| Assumptions for estimating missing historical data | <ul style="list-style-type: none"> <li>● Assumptions for modifying IEAWEb during 1960-2015 are as follows: <ul style="list-style-type: none"> <li>➤ Industry sector: <ul style="list-style-type: none"> <li>✧ Data of hard coal and coke oven coke/natural gas and LPG/crude oil/heavy fuel oil before 1974/1981/1965/1969 were distributed to sub-sectors based on relative ratios of fuel consumption data in 1975/1982/1966/1970.</li> </ul> </li> <li>➤ Residential and other sectors: <ul style="list-style-type: none"> <li>✧ Data of heavy fuel oil before 1969 were distributed to sub-sectors based on relative ratios in 1970.</li> </ul> </li> <li>➤ Other kerosene and diesel oil: <ul style="list-style-type: none"> <li>✧ Data of total final consumption before 1969 were distributed to sub-sectors based on relative ratios in 1970.</li> </ul> </li> </ul> </li> <li>● See "Assumption for data extrapolation" in this sub-section how to extrapolate the data of IEAWEb to 1950 except for following procedures: <ul style="list-style-type: none"> <li>➤ Consumption of hard coal, brown coal, patent fuel, coke oven coke, gas works gas, natural gas, and primary solid biofuels in residential sector were extrapolated to 1950 using the Historical Statistics of Japan (Japan Statistical Association, 2006).</li> <li>➤ Consumption of primary solid biofuels in paper, pulp and printing industry before 1981 were extrapolated to 1950 based on trends of production amounts of paper and pulp in Japan (Economy, Trade and Industry Statistics Association, 1998).</li> </ul> </li> </ul> |

**(d) Republic of Korea**

|                                                    |                                                                                                                                                                                                                                                                                                                                                                                                                                                                                                                                                                                                                                                                                                                                                                                                                                                                                                                                                                                             |
|----------------------------------------------------|---------------------------------------------------------------------------------------------------------------------------------------------------------------------------------------------------------------------------------------------------------------------------------------------------------------------------------------------------------------------------------------------------------------------------------------------------------------------------------------------------------------------------------------------------------------------------------------------------------------------------------------------------------------------------------------------------------------------------------------------------------------------------------------------------------------------------------------------------------------------------------------------------------------------------------------------------------------------------------------------|
| Data sources and treatments                        | <ul style="list-style-type: none"><li>● Data of whole country were taken from IEAWEB during 1971-2015 and extrapolated to 1950.</li></ul>                                                                                                                                                                                                                                                                                                                                                                                                                                                                                                                                                                                                                                                                                                                                                                                                                                                   |
| Assumptions for estimating missing historical data | <ul style="list-style-type: none"><li>● Assumptions for modifying IEAWEB during 1971-2015 are as follows:<ul style="list-style-type: none"><li>➤ Industry sector:<ul style="list-style-type: none"><li>✧ Data of coke oven coke/other kerosene, diesel oil, and heavy fuel oil/natural gas before 2001/1980/1992 were distributed to sub-sectors based on relative ratios of fuel consumption data in 2002/1981/1993.</li></ul></li><li>➤ Transport and other sectors:<ul style="list-style-type: none"><li>✧ Data of diesel oil and heavy fuel oil before 1980 were distributed to sub-sectors based on relative ratios in 1981.</li></ul></li><li>➤ Residential and other sectors:<ul style="list-style-type: none"><li>✧ Data of primary solid biofuels before 1989 were distributed to sub-sectors based on relative ratios in 1990.</li></ul></li></ul></li><li>● See "Assumption for data extrapolation" in this sub-section how to extrapolate the data of IEAWEB to 1950.</li></ul> |

**(e) Taiwan**

|                                                    |                                                                                                                                                                                                                                                                                                                                                                                                                                                                                                                              |
|----------------------------------------------------|------------------------------------------------------------------------------------------------------------------------------------------------------------------------------------------------------------------------------------------------------------------------------------------------------------------------------------------------------------------------------------------------------------------------------------------------------------------------------------------------------------------------------|
| Data sources and treatments                        | <ul style="list-style-type: none"><li>● Data of whole country were taken from IEAWEB during 1971-2015 and extrapolated to 1950.</li></ul>                                                                                                                                                                                                                                                                                                                                                                                    |
| Assumptions for estimating missing historical data | <ul style="list-style-type: none"><li>● Assumptions for modifying IEAWEB during 1971-2015 are as follows:<ul style="list-style-type: none"><li>➤ Residential and other sectors:<ul style="list-style-type: none"><li>✧ Data of diesel oil/heavy fuel oil before 1979/1981 were distributed to sub-sectors based on relative ratios of fuel consumption data in 1980/1982.</li></ul></li></ul></li><li>● See "Assumption for data extrapolation" in this sub-section how to extrapolate the data of IEAWEB to 1950.</li></ul> |

**(f) Indonesia**

|                                                    |                                                                                                                                                                                                                                                                                                                                                                                                                                                                                                                                                                                                                                                                                                                                                                                                                                                                                                                                                                                                                                                                                                                                         |
|----------------------------------------------------|-----------------------------------------------------------------------------------------------------------------------------------------------------------------------------------------------------------------------------------------------------------------------------------------------------------------------------------------------------------------------------------------------------------------------------------------------------------------------------------------------------------------------------------------------------------------------------------------------------------------------------------------------------------------------------------------------------------------------------------------------------------------------------------------------------------------------------------------------------------------------------------------------------------------------------------------------------------------------------------------------------------------------------------------------------------------------------------------------------------------------------------------|
| Data sources and treatments                        | <ul style="list-style-type: none"><li>● Data of whole country were taken from IEAWEBS during 1971-2015 and extrapolated to 1950.</li></ul>                                                                                                                                                                                                                                                                                                                                                                                                                                                                                                                                                                                                                                                                                                                                                                                                                                                                                                                                                                                              |
| Assumptions for estimating missing historical data | <ul style="list-style-type: none"><li>● Assumptions for modifying IEAWEBS during 1971-2015 are as follows:<ul style="list-style-type: none"><li>➤ Industry sector:<ul style="list-style-type: none"><li>✧ Data of other bituminous coal and sub-bituminous coal before 1999 were distributed to sub-sectors based on relative ratios of consumption data of sub-bituminous coal in 2000.</li><li>✧ Data of natural gas/diesel oil and heavy fuel oil before 1980/1988 were distributed to sub-sectors based on relative ratios of fuel consumption data in 1981/1989.</li><li>✧ Fuel consumption data of primary solid biofuels in 1990 were extrapolated to 1971 using trends of primary solid biofuels consumption data in the other sector in IEAWEBS during 1971-1990.</li></ul></li><li>➤ Transport, residential and other sectors:<ul style="list-style-type: none"><li>✧ Data of heavy fuel oil after 2000 were distributed to sub-sectors based on relative ratios in 1999.</li></ul></li></ul></li><li>● See "Assumption for data extrapolation" in this sub-section how to extrapolate the data of IEAWEBS to 1950.</li></ul> |

**(g) Myanmar**

|                                                    |                                                                                                                                                                                                                                                                                                                                                                                                                                                                                                                         |
|----------------------------------------------------|-------------------------------------------------------------------------------------------------------------------------------------------------------------------------------------------------------------------------------------------------------------------------------------------------------------------------------------------------------------------------------------------------------------------------------------------------------------------------------------------------------------------------|
| Data sources and treatments                        | <ul style="list-style-type: none"><li>● Data of whole country were taken from IEAWEBS during 1971-2015 and extrapolated to 1950.</li></ul>                                                                                                                                                                                                                                                                                                                                                                              |
| Assumptions for estimating missing historical data | <ul style="list-style-type: none"><li>● Assumptions for modifying IEAWEBS during 1971-2015 are as follows:<ul style="list-style-type: none"><li>➤ Industry sector:<ul style="list-style-type: none"><li>✧ Data of other bituminous coal/diesel oil before 2010/2011 were distributed to sub-sectors based on relative ratios of fuel consumption data in 2011/2012.</li></ul></li></ul></li><li>● See "Assumption for data extrapolation" in this sub-section how to extrapolate the data of IEAWEBS to 1950.</li></ul> |

**(h) Philippines**

|                                                    |                                                                                                                                                                                                                                                                                                                                                                                                                                                                                                            |
|----------------------------------------------------|------------------------------------------------------------------------------------------------------------------------------------------------------------------------------------------------------------------------------------------------------------------------------------------------------------------------------------------------------------------------------------------------------------------------------------------------------------------------------------------------------------|
| Data sources and treatments                        | <ul style="list-style-type: none"><li>● Data of whole country were taken from IEAWEBS during 1971-2015 and extrapolated to 1950.</li></ul>                                                                                                                                                                                                                                                                                                                                                                 |
| Assumptions for estimating missing historical data | <ul style="list-style-type: none"><li>● Assumptions for modifying IEAWEBS during 1971-2015 are as follows:<ul style="list-style-type: none"><li>➤ Industry sector:<ul style="list-style-type: none"><li>✧ Data of diesel oil and heavy fuel oil before 1979 were distributed to sub-sectors based on relative ratios of fuel consumption data in 1980.</li></ul></li></ul></li><li>● See "Assumption for data extrapolation" in this sub-section how to extrapolate the data of IEAWEBS to 1950.</li></ul> |

**(i) Singapore**

|                                                    |                                                                                                                                                                                                                                                                                                                                                                                                                                                                                                        |
|----------------------------------------------------|--------------------------------------------------------------------------------------------------------------------------------------------------------------------------------------------------------------------------------------------------------------------------------------------------------------------------------------------------------------------------------------------------------------------------------------------------------------------------------------------------------|
| Data sources and treatments                        | <ul style="list-style-type: none"><li>● Data of whole country were taken from IEAWEBS during 1971-2015 and extrapolated to 1950.</li></ul>                                                                                                                                                                                                                                                                                                                                                             |
| Assumptions for estimating missing historical data | <ul style="list-style-type: none"><li>● Assumptions for modifying IEAWEBS during 1971-2015 are as follows:<ul style="list-style-type: none"><li>➤ Residential and other sectors:<ul style="list-style-type: none"><li>✧ Data of natural gas before 2005 were distributed to sub-sectors based on relative ratios of fuel consumption data in 2006.</li></ul></li></ul></li><li>● See "Assumption for data extrapolation" in this sub-section how to extrapolate the data of IEAWEBS to 1950.</li></ul> |

**(j) Thailand**

|                                                    |                                                                                                                                                                                                                                                                                                                                                                                                                                                                                                                          |
|----------------------------------------------------|--------------------------------------------------------------------------------------------------------------------------------------------------------------------------------------------------------------------------------------------------------------------------------------------------------------------------------------------------------------------------------------------------------------------------------------------------------------------------------------------------------------------------|
| Data sources and treatments                        | <ul style="list-style-type: none"><li>● Data of whole country were taken from IEAWEBS during 1971-2015 and extrapolated to 1950.</li></ul>                                                                                                                                                                                                                                                                                                                                                                               |
| Assumptions for estimating missing historical data | <ul style="list-style-type: none"><li>● Assumptions for modifying IEAWEBS during 1971-2015 are as follows:<ul style="list-style-type: none"><li>➤ Industry sector:<ul style="list-style-type: none"><li>✧ Data of other bituminous coal/natural gas before 1988/2001 were distributed to sub-sectors based on relative ratios of fuel consumption data in 1989/2002.</li></ul></li></ul></li><li>● See "Assumption for data extrapolation" in this sub-section how to extrapolate the data of IEAWEBS to 1950.</li></ul> |

**(k) Vietnam**

|                                                    |                                                                                                                                                                                                                                                                                                                                                                                                                                                                                                                                                                                                                                                                                                                                                                                                                                                                                                                                                                                                                                                                                                                                                                                                                                                            |
|----------------------------------------------------|------------------------------------------------------------------------------------------------------------------------------------------------------------------------------------------------------------------------------------------------------------------------------------------------------------------------------------------------------------------------------------------------------------------------------------------------------------------------------------------------------------------------------------------------------------------------------------------------------------------------------------------------------------------------------------------------------------------------------------------------------------------------------------------------------------------------------------------------------------------------------------------------------------------------------------------------------------------------------------------------------------------------------------------------------------------------------------------------------------------------------------------------------------------------------------------------------------------------------------------------------------|
| Data sources and treatments                        | <ul style="list-style-type: none"> <li>● Data of whole country were taken from IEAWEB during 1971-2015 and extrapolated to 1950.</li> </ul>                                                                                                                                                                                                                                                                                                                                                                                                                                                                                                                                                                                                                                                                                                                                                                                                                                                                                                                                                                                                                                                                                                                |
| Assumptions for estimating missing historical data | <ul style="list-style-type: none"> <li>● Assumptions for modifying IEAWEB during 1971-2015 are as follows: <ul style="list-style-type: none"> <li>➤ Industry <ul style="list-style-type: none"> <li>✧ Data of anthracite, diesel oil and heavy fuel oil during 1980-2009 were distributed to sub-sectors based on relative ratios of corresponding fuel consumption data in 2010.</li> <li>✧ Data of natural gas before 2009 were distributed to sub-sectors based on relative ratios in 2010.</li> <li>✧ Data of other bituminous coal and lignite before 2009 were distributed to sub-sectors based on relative ratios of anthracite consumption data in 2010.</li> <li>✧ Data of other bituminous coal and sub-bituminous coal after 2011 were distributed to sub-sectors based on relative ratios of anthracite consumption data in corresponding years of 2011-2015.</li> </ul> </li> <li>➤ Hard coal, diesel oil, and heavy fuel oil <ul style="list-style-type: none"> <li>✧ Data of total final consumption before 1979 were distributed to sub-sectors based on relative ratios in 1980.</li> </ul> </li> </ul> </li> <li>● See "Assumption for data extrapolation" in this sub-section how to extrapolate the data of IEAWEB to 1950.</li> </ul> |

**(l) Mongolia**

|                                                    |                                                                                                                                                                                                                                         |
|----------------------------------------------------|-----------------------------------------------------------------------------------------------------------------------------------------------------------------------------------------------------------------------------------------|
| Data sources and treatments                        | <ul style="list-style-type: none"> <li>● Data of whole country were taken from IEAWEB during 1985-2015 and extrapolated to 1950.</li> </ul>                                                                                             |
| Assumptions for estimating missing historical data | <ul style="list-style-type: none"> <li>● No major modifications were done for IEAWEB during 1985-2015.</li> <li>● See "Assumption for data extrapolation" in this sub-section how to extrapolate the data of IEAWEB to 1950.</li> </ul> |

**(m) Cambodia**

|                                                    |                                                                                                                                                                                                                                         |
|----------------------------------------------------|-----------------------------------------------------------------------------------------------------------------------------------------------------------------------------------------------------------------------------------------|
| Data sources and treatments                        | <ul style="list-style-type: none"> <li>● Data of whole country were taken from IEAWEB during 1995-2015 and extrapolated to 1950.</li> </ul>                                                                                             |
| Assumptions for estimating missing historical data | <ul style="list-style-type: none"> <li>● No major modifications were done for IEAWEB during 1995-2015.</li> <li>● See "Assumption for data extrapolation" in this sub-section how to extrapolate the data of IEAWEB to 1950.</li> </ul> |

**(n) Hong Kong, Democratic People's Republic of Korea, Brunei, Malaysia, Bangladesh, Nepal, Pakistan, and Sri Lanka**

|                                                    |                                                                                                                                                                                                                                           |
|----------------------------------------------------|-------------------------------------------------------------------------------------------------------------------------------------------------------------------------------------------------------------------------------------------|
| Data sources and treatments                        | <ul style="list-style-type: none"> <li>● Data of whole country were taken from IEAWEBS during 1971-2015 and extrapolated to 1950.</li> </ul>                                                                                              |
| Assumptions for estimating missing historical data | <ul style="list-style-type: none"> <li>● No major modifications were done for IEAWEBS during 1995-2015.</li> <li>● See "Assumption for data extrapolation" in this sub-section how to extrapolate the data of IEAWEBS to 1950.</li> </ul> |

**(o) Macau, Laos, Afghanistan, Bhutan, and Maldives**

|                                                    |                                                                                                                                                                                                                                                                                                                                                                                                                                                      |
|----------------------------------------------------|------------------------------------------------------------------------------------------------------------------------------------------------------------------------------------------------------------------------------------------------------------------------------------------------------------------------------------------------------------------------------------------------------------------------------------------------------|
| Data sources and treatments                        | <ul style="list-style-type: none"> <li>● Data of whole country were taken from UN data during 1990-2015 and extrapolated to 1950.</li> </ul>                                                                                                                                                                                                                                                                                                         |
| Assumptions for estimating missing historical data | <ul style="list-style-type: none"> <li>● No major modifications were done for UN data during 1990-2015.</li> <li>● Data before 1990 were extrapolated to 1950 using trends of fuel consumption estimated using UN Energy Statistics Database as follows:<br/>Consumption = Production + Import – Export + Changes in stocks</li> <li>● Biofuel consumption data before 1970 were extrapolated to 1950 using trends of population numbers.</li> </ul> |

**Assumption for data extrapolation**

As described above, fuel consumption data before 1959 and 1970 were not included in IEAWEBS for Japan and other countries, respectively. The missing historical fuel consumption data were estimated by extrapolation using trends of related data for each sub-sector. Trend factors used in REASv3 are summarized in Table 3.3.

**Table. 3.3.** Trend factors for extrapolating fuel consumption data to 1950 in each sub-sector.

| Sub-sectors                                          | Trend factors and data sources                                                                                                                                                                                                                                                                 |
|------------------------------------------------------|------------------------------------------------------------------------------------------------------------------------------------------------------------------------------------------------------------------------------------------------------------------------------------------------|
| Power plants including energy sector                 | <ul style="list-style-type: none"> <li>● Trend factors: Amounts of generated power for all fuel types</li> <li>● Data sources: <ul style="list-style-type: none"> <li>➢ Each region of China: China Data Online</li> <li>➢ Other countries and regions: Mitchell (1998)</li> </ul> </li> </ul> |
| Coke ovens and blast furnace including energy sector | <ul style="list-style-type: none"> <li>● Trend factors: Amounts of pig iron production for all fuel types</li> <li>● Data sources: See Sect. S4.1.1</li> </ul>                                                                                                                                 |
| Charcoal production plants                           | <ul style="list-style-type: none"> <li>● Trend factors: Amounts of charcoal production for all fuel types</li> <li>● Data sources: Data after 1961 were obtained from FAOSTAT</li> </ul>                                                                                                       |

|                                                          |                                                                                                                                                                                                                                                                                                                                                                                                                                                                                                                                                                                                                                                                                                                                                        |
|----------------------------------------------------------|--------------------------------------------------------------------------------------------------------------------------------------------------------------------------------------------------------------------------------------------------------------------------------------------------------------------------------------------------------------------------------------------------------------------------------------------------------------------------------------------------------------------------------------------------------------------------------------------------------------------------------------------------------------------------------------------------------------------------------------------------------|
|                                                          | ( <a href="http://www.fao.org/faostat/en">http://www.fao.org/faostat/en</a> ) and trends between 1950 and 1960 were assumed based on Fernandes et al. (2007).                                                                                                                                                                                                                                                                                                                                                                                                                                                                                                                                                                                          |
| Petroleum Refineries including energy sector             | <ul style="list-style-type: none"> <li>● Trend factors: Amounts of total crude oil consumption for all fuel types</li> <li>● Data sources: Total crude oil consumption was estimated using Mitchell (1998) as follow: Consumption = Production + Import – Export</li> </ul>                                                                                                                                                                                                                                                                                                                                                                                                                                                                            |
| Iron and steel                                           | <ul style="list-style-type: none"> <li>● Trend factors: Total amounts of pig iron and crude steel production for all fuel types</li> <li>● Data sources: See Sect. S4.1.1</li> </ul>                                                                                                                                                                                                                                                                                                                                                                                                                                                                                                                                                                   |
| Non-ferrous metals                                       | <ul style="list-style-type: none"> <li>● Trend factors: Total amounts of copper, lead, zinc, and primary aluminum production for all fuel types</li> <li>● Data sources: See Sect. S4.1.2</li> </ul>                                                                                                                                                                                                                                                                                                                                                                                                                                                                                                                                                   |
| Non-metallic minerals industry (cement, lime, and brick) | <ul style="list-style-type: none"> <li>● Trend factors: Amounts of cement production for all fuel types</li> <li>● Data sources: See Sect. S4.1.3</li> </ul>                                                                                                                                                                                                                                                                                                                                                                                                                                                                                                                                                                                           |
| Railway                                                  | <ul style="list-style-type: none"> <li>● Trend factors: Length of railway line for all fuel types</li> <li>● Data sources: Mitchell (1998)</li> </ul>                                                                                                                                                                                                                                                                                                                                                                                                                                                                                                                                                                                                  |
| Road transport                                           | <ul style="list-style-type: none"> <li>● Trend factors: Total annual mileages of vehicles for each fuel type</li> <li>● Data sources: See Sect. S6.1.1</li> </ul>                                                                                                                                                                                                                                                                                                                                                                                                                                                                                                                                                                                      |
| Others                                                   | <ul style="list-style-type: none"> <li>● Trend factors and data sources: <ul style="list-style-type: none"> <li>➢ Coal fuels except for coke fuels: Total coal consumption estimated using Mitchell (1998) as follows: Consumption = Production + Import – Export</li> <li>➢ Coke fuels and gas fuels except for natural gas: The same trends as those for coke ovens</li> <li>➢ Natural gas: Total natural gas consumption estimated using Mitchell (1998)</li> <li>➢ Oil fuels: The same trends as those for petroleum refineries</li> <li>➢ Biofuels: See Sect. S3.1.8</li> <li>➢ Charcoal: The same trends as those for charcoal production plants</li> <li>➢ Other fuels: Fuel consumption data were not extended to 1950.</li> </ul> </li> </ul> |

### S3.1.3 Regional fuel consumption data in China

REASv3 used CESY for fuel consumption data of regions in China defined in Table 2.1 except for Hong Kong and Macau. However, in CESY, only total data are available in industry and transport sectors which need to be distributed to sub-sectors. In REASv3, weighting factors for the distribution were prepared for each region. Basic methodology and data used for the weighting factors are described briefly in this sub-section. Note that all motor gasoline listed in both industry and transport sectors of CESY are assumed to be consumed in road transport sector based on IEAWEB.

#### Industry sector

For most regions, total consumption data in industry sector were divided into sub-sectors based on weighting factors prepared using energy data in statistical yearbook of each region. Availabilities of detailed data for the weighting factors are different among regions and summarized in Table 3.4 except for Shanghai, Jiangsu, Zhejiang, Shandong, Hainan and Sichuan where no energy data are available in statistical yearbook of each region.

**Table. 3.4.** Data sources and treatments of weighting factors for each region to distribute total fuel consumption in industry sector to each sub-sector.

| Regions | Data sources and treatments                                                                                                                                                                                                                                                              |
|---------|------------------------------------------------------------------------------------------------------------------------------------------------------------------------------------------------------------------------------------------------------------------------------------------|
| Beijing | <ul style="list-style-type: none"><li>● Data of major fuel types were taken from Beijing Statistical Yearbook.</li><li>● For the year when statistics are not available, data in 2001/2005/2007/2010/2014 were used before 2000/for 2004/for 2008/for 2011/for 2015.</li></ul>           |
| Tianjin | <ul style="list-style-type: none"><li>● Data of major fuel types were taken from Tianjin Statistical Yearbook.</li><li>● For the year when statistics are not available, data in 2001/2010/2013 were used before 2000/for 2011/after 2012.</li></ul>                                     |
| Hebei   | <ul style="list-style-type: none"><li>● Consumption of main energy sources were taken from Hebei Statistical Yearbook and used for all fuel types.</li><li>● For the year when statistics are not available, data in 2005/2010/2013 were used before 2004/for 2011/after 2012.</li></ul> |
| Shanxi  | <ul style="list-style-type: none"><li>● Data of coal, coke, and diesel oil were taken from Shanxi Statistical Yearbook. For other fuels, weighting factors were based on data of REASv2 (based on GAINS ASIA at that time).</li></ul>                                                    |

|                |                                                                                                                                                                                                                                                                                                 |
|----------------|-------------------------------------------------------------------------------------------------------------------------------------------------------------------------------------------------------------------------------------------------------------------------------------------------|
|                | <ul style="list-style-type: none"> <li>● For the year when Shanxi Statistical Yearbook are not available, data in 2000/2010/2013/2014 were used before 1999/for 2011/for 2012/for 2015. For REASv2 (available during 2000-2008), data in 2000/2008 were used before 1999/after 2009.</li> </ul> |
| Inner Mongolia | <ul style="list-style-type: none"> <li>● Data of major fuel types were taken from Inner Mongolia Statistical Yearbook.</li> <li>● For the year when statistics are not available, data in 2001/2007/2010/2013 were used before 2000/for 2006/for 2011/after 2012.</li> </ul>                    |
| Liaoning       | <ul style="list-style-type: none"> <li>● Data of major fuel types were taken from Liaoning Statistical Yearbook.</li> <li>● For the year when statistics are not available, data in 2001/2010/2013 were used before 2000/for 2011/after 2012.</li> </ul>                                        |
| Jilin          | <ul style="list-style-type: none"> <li>● Data of major fuel types were taken from Jilin Statistical Yearbook.</li> <li>● For the year when statistics are not available, data in 2000/2002/2005/2010/2013 were used before 1999/for 2001/for 2004/for 2011/after 2012.</li> </ul>               |
| Heilongjiang   | <ul style="list-style-type: none"> <li>● Data of major fuel types were taken from Heilongjiang Statistical Yearbook.</li> <li>● For the year when statistics are not available, data in 2005/2010/2013 were used before 2004/for 2011/after 2012.</li> </ul>                                    |
| Shanghai       | See descriptions below this table.                                                                                                                                                                                                                                                              |
| Jiangsu        | See descriptions below this table.                                                                                                                                                                                                                                                              |
| Zhejiang       | See descriptions below this table.                                                                                                                                                                                                                                                              |
| Anhui          | <ul style="list-style-type: none"> <li>● Data of major fuel types were taken from Anhui Statistical Yearbook.</li> <li>● For the year when statistics are not available, data in 2000/2002/2005/2010/2013 were used before 1999/for 2001/for 2004/for 2011/after 2012.</li> </ul>               |
| Fujian         | <ul style="list-style-type: none"> <li>● Data of major fuel types were taken from Fujian Statistical Yearbook.</li> <li>● For the year when statistics are not available, data in 2001/2010/2013 were used before 2000/for 2011/after 2012.</li> </ul>                                          |
| Jiangxi        | <ul style="list-style-type: none"> <li>● Data of major fuel types were taken from Jiangxi Statistical Yearbook.</li> <li>● For the year when statistics are not available, data in 2000/2010/2013 were used before 1999/for 2011/after 2012.</li> </ul>                                         |
| Shandong       | See descriptions below this table.                                                                                                                                                                                                                                                              |

|           |                                                                                                                                                                                                                                                                                                                                                                                                                                                                                |
|-----------|--------------------------------------------------------------------------------------------------------------------------------------------------------------------------------------------------------------------------------------------------------------------------------------------------------------------------------------------------------------------------------------------------------------------------------------------------------------------------------|
| Henan     | <ul style="list-style-type: none"> <li>● Data of major fuel types were taken from Henan Statistical Yearbook.</li> <li>● For the year when statistics are not available, data in 2001/2010/2013 were used before 2000/for 2011/after 2012.</li> </ul>                                                                                                                                                                                                                          |
| Hubei     | <ul style="list-style-type: none"> <li>● Data of coal and diesel oil were taken from Hubei Statistical Yearbook. For other fuels, weighting factors were based on data of REASv2 (based on GAINS ASIA at that time).</li> <li>● For the year when Hubei Statistical Yearbook are not available, data in 2000/2010/2013 were used before 1999/for 2011/after 2012. For REASv2 (available during 2000-2008), data in 2000/2008 were used before 1999/after 2009.</li> </ul>      |
| Hunan     | <ul style="list-style-type: none"> <li>● Data of major fuel types were taken from Hunan Statistical Yearbook.</li> <li>● For the year when statistics are not available, data in 2001/2005/2010/2013 were used before 2000/for 2004/for 2011/after 2012.</li> </ul>                                                                                                                                                                                                            |
| Guangdong | <ul style="list-style-type: none"> <li>● Data of coal were taken from Guangdong Statistical Yearbook. For other fuels, weighting factors were based on data of REASv2 (based on GAINS ASIA at that time).</li> <li>● For the year when Guangdong Statistical Yearbook are not available, data in 2000/2010/2013/2014 were used before 1999/for 2011/for 2012/for 2015. For REASv2 (available during 2000-2008), data in 2000/2008 were used before 1999/after 2009.</li> </ul> |
| Guangxi   | <ul style="list-style-type: none"> <li>● Data of total energy consumption were taken from Guangxi Statistical Yearbook for all fuel types.</li> <li>● For the year when statistics are not available, data in 1995/2000/2014 were used before 1997/for 1998 and 1999/for 2015.</li> </ul>                                                                                                                                                                                      |
| Hainan    | See descriptions below this table.                                                                                                                                                                                                                                                                                                                                                                                                                                             |
| Chongqing | <ul style="list-style-type: none"> <li>● Data of major fuel types were taken from Chongqing Statistical Yearbook.</li> <li>● For the year when statistics are not available, data in 2001/2010/2013 were used before 2000/for 2011/after 2014.</li> </ul>                                                                                                                                                                                                                      |
| Sichuan   | See descriptions below this table.                                                                                                                                                                                                                                                                                                                                                                                                                                             |
| Guizhou   | <ul style="list-style-type: none"> <li>● Data of major fuel types were taken from Guizhou Statistical Yearbook.</li> <li>● For the year when statistics are not available, data in 2000/2010/2014 were used before 1999/for 2011/for 2015.</li> </ul>                                                                                                                                                                                                                          |
| Yunnan    | <ul style="list-style-type: none"> <li>● Data of coal, coke, and oil were taken from Yunnan Statistical</li> </ul>                                                                                                                                                                                                                                                                                                                                                             |

|           |                                                                                                                                                                                                                                                                                                                                                                                                                                                                                                            |
|-----------|------------------------------------------------------------------------------------------------------------------------------------------------------------------------------------------------------------------------------------------------------------------------------------------------------------------------------------------------------------------------------------------------------------------------------------------------------------------------------------------------------------|
|           | <p>Yearbook. For other fuels, weighting factors were based on data of REASv2 (based on GAINS ASIA at that time).</p> <ul style="list-style-type: none"> <li>● For the year when Yunnan Statistical Yearbook are not available, data in 2000/2013 were used before 1999/after 2014. For REASv2 (available during 2000-2008), data in 2000/2008 were used before 1999/after 2009.</li> </ul>                                                                                                                 |
| Tibet     | <ul style="list-style-type: none"> <li>● Fuel consumption data were not from CESY. (See Sect. S3.1.2)</li> </ul>                                                                                                                                                                                                                                                                                                                                                                                           |
| Shaanxi   | <ul style="list-style-type: none"> <li>● Data of coal, coke, and diesel oil were taken from Shaanxi Statistical Yearbook. For other fuels, weighting factors were based on data of REASv2 (based on GAINS ASIA at that time).</li> <li>● For the year when Shanxi Statistical Yearbook are not available, data in 2002/2005/2010/2013 were used before 2001/for 2004/for 2009 and 2011/after 2012. For REASv2 (available during 2000-2008), data in 2000/2008 were used before 1999/after 2009.</li> </ul> |
| Gansu     | <ul style="list-style-type: none"> <li>● Data of major fuel types were taken from Gansu Statistical Yearbook.</li> <li>● For the year when statistics are not available, data in 2001/2010/2013/2014 were used before 2000/for 2011/for 2012/for 2015.</li> </ul>                                                                                                                                                                                                                                          |
| Qinghai   | <ul style="list-style-type: none"> <li>● Data of coal were taken from Qinghai Statistical Yearbook. For other fuels, weighting factors were based on data of REASv2 (based on GAINS ASIA at that time).</li> <li>● For the year when Qinghai Statistical Yearbook are not available, data in 2001/2010/2013 were used before 2000/for 2011/after 2012. For REASv2 (available during 2000-2008), data in 2000/2008 were used before 1999/after 2009.</li> </ul>                                             |
| Ningxia   | <ul style="list-style-type: none"> <li>● Data of major fuel types were taken from Ningxia Statistical Yearbook.</li> <li>● For the year when statistics are not available, data in 2000/2010/2013 were used before 1999/for 2011/after 2012.</li> </ul>                                                                                                                                                                                                                                                    |
| Xinjiang  | <ul style="list-style-type: none"> <li>● Data of major fuel types were taken from Xinjiang Statistical Yearbook.</li> <li>● For the year when statistics are not available, data in 2001/2007/2009/2013 were used before 2000/for 2008/for 2010 and 2011/after 2012.</li> </ul>                                                                                                                                                                                                                            |
| Hong Kong | Fuel consumption data were not from CESY. (See Sect. S3.1.2)                                                                                                                                                                                                                                                                                                                                                                                                                                               |
| Macau     | Fuel consumption data were not from CESY. (See Sect. S3.1.2)                                                                                                                                                                                                                                                                                                                                                                                                                                               |

For Shanghai, Jiangsu, Zhejiang, Shandong, Hainan and Sichuan, weighting factors were assumed based on sub-sector level fuel consumption data developed using the China total data described in Sect. S3.1.2 and related regional data as follows:

- Weighting factors to distribute fuel consumption in whole China to each region were prepared for each sub-sector and commonly used for all fuel types. The weighting factors for each sub-sector used in REASv3 are as follows:
  - Amounts of steel production in each region (see Sect. S4.1.1) were used for iron and steel sub-sector.
  - Total amounts of copper, lead, zinc, and primary aluminum production in each region (see Sect. S4.1.2) were used for non-ferrous metals sub-sector.
  - Amounts of cement production in each region (see Sect. S4.1.3) were used for non-metallic minerals sub-sector in IEAWE. (Fuel consumption in non-metallic minerals were further distributed to cement, lime, and brick sub-sectors in REASv3. See Sect. S3.1.7.)
  - Amounts of coal production in each region taken from China Data Online were used for coal mines (in energy sector) and mining and quarrying sub-sectors.
  - Amounts of paper and paperboard production in each region taken from China Data Online were used for paper, pulp and prints sub-sector.
  - Amounts of textile production in each region (see Sect. S5.1.2) were used for textile and leather sub-sector.
  - GDP of each region taken from China Data Online were used for other sectors.
- Using the China total data and the weighting factors, the tentative regional fuel consumption data (TRFCD) were developed. Then, the fuel consumption ratio of each sub-sector to industry sector total was calculated for Shanghai, Jiangsu, Zhejiang, Shandong, Hainan and Sichuan using the TRFCD of each region. Finally, fuel consumption in industry sector of each region in CESY was distributed to sub-sectors using the corresponding ratios. When categories of fuel types are different between the TRFCD and CESY, following procedures were adopted:
  - For raw coal, cleaned coal, and other washed coal in CESY, the ratio for total of anthracite, coking coal and other bituminous coal in the TRFCD were used.
  - For other coking products and other petroleum products in CESY, the ratio for coke oven coke and heavy fuel oil in the TRFCD were used, respectively.

## Transport sector

For transport sector, no detailed data are available even in statistical yearbook of each region. Therefore, weighting factors for each region were assumed in the similar procedure for industry sector as follows:

- As mentioned in the first paragraph of this sub-section, all motor gasoline consumption (including those in industry sector) is distributed to road transport sector.
- All solid coal fuels are assumed to be used in railway sector.
- Natural gas consumption before and after 1995 was distributed to pipeline transport and road transport sectors, respectively.
- All heavy fuel oil consumption is distributed to domestic navigation sector.
- For diesel oil, using the same methodology for industry sector, diesel oil consumption data in road transport, railway, and domestic navigation sectors in each region were developed and then, weighting factors were assumed. For regional diesel oil consumption data, those in railway and domestic navigation sectors were taken from REASv2 (based on GAINS ASIA at that time) during 2000-2008 and data in 2000 and 2008 were used before 1999 and 2009, respectively. See Sect. S6.1.2 for diesel oil consumption in each region in road transport sector.
- Consumption of all other fuels is distributed to non-specified transport sector.
- Assumptions of motor gasoline, solid coal fuels, natural gas and heavy fuel oil described above were based on IEAWEB.

### S3.1.4 Regional fuel consumption data in India

As defined in Table 2.1, REASv3 has 17 sub-regions for India. Therefore, fuel consumption data of country total based on IEAWEB need to be divided for each sub-region. Table 3.5 provides weighting factors used to allocate country total data to the 17 sub-regions.

**Table. 3.5.** Weighting factors for allocating country total fuel consumption data to the 17 sub-regions in India.

| Sectors and fuel types               | Weighting factors and data sources                                                                                                                                                          |
|--------------------------------------|---------------------------------------------------------------------------------------------------------------------------------------------------------------------------------------------|
| Power plants including energy sector | <ul style="list-style-type: none"><li>● Weighting factors: Total generation capacities in each region</li><li>● Data sources: World Electric Power Plants Database (Platts, 2018)</li></ul> |
| Iron and steel                       | <ul style="list-style-type: none"><li>● Weighting factors: Amounts of crude steel production for all fuel types</li><li>● Data sources: See Sect. S4.1.1</li></ul>                          |
| Non-ferrous metals                   | <ul style="list-style-type: none"><li>● Weighting factors: Total amounts of copper, lead, zinc, and primary</li></ul>                                                                       |

|                                                          |                                                                                                                                                                                                                                                                                                                                                                                                                                                                                                                                                                                                                                                                                                                                                    |
|----------------------------------------------------------|----------------------------------------------------------------------------------------------------------------------------------------------------------------------------------------------------------------------------------------------------------------------------------------------------------------------------------------------------------------------------------------------------------------------------------------------------------------------------------------------------------------------------------------------------------------------------------------------------------------------------------------------------------------------------------------------------------------------------------------------------|
|                                                          | <p>aluminum production for all fuel types</p> <ul style="list-style-type: none"> <li>● Data sources: See Sect. S4.1.2</li> </ul>                                                                                                                                                                                                                                                                                                                                                                                                                                                                                                                                                                                                                   |
| Non-metallic minerals industry (cement, lime, and brick) | <ul style="list-style-type: none"> <li>● Weighting factors: Amounts of cement production for all fuel types</li> <li>● Data sources: See Sect. S4.1.3</li> </ul>                                                                                                                                                                                                                                                                                                                                                                                                                                                                                                                                                                                   |
| Road                                                     | <ul style="list-style-type: none"> <li>● See Sect. S6.1</li> </ul>                                                                                                                                                                                                                                                                                                                                                                                                                                                                                                                                                                                                                                                                                 |
| Rail                                                     | <ul style="list-style-type: none"> <li>● Weighting factors: Length of railway line for all fuel types</li> <li>● Data sources: Factors after 2005 were estimated from TERI (2013, 2018) and those in 2005 were used before 2004.</li> </ul>                                                                                                                                                                                                                                                                                                                                                                                                                                                                                                        |
| Biofuels                                                 | <ul style="list-style-type: none"> <li>● See Sect. S3.1.8</li> </ul>                                                                                                                                                                                                                                                                                                                                                                                                                                                                                                                                                                                                                                                                               |
| Industry and energy sectors (default)                    | <ul style="list-style-type: none"> <li>● Weighting factors and data sources: <ul style="list-style-type: none"> <li>➤ Factors for LPG, motor gasoline, kerosene, diesel oil, heavy fuel oil, and naphtha during 1998-2013 were estimated from TERI (2013, 2018) and those in 1998 and 2013 were used before 1997 and after 2014, respectively.</li> <li>➤ Factors for other fuels after 1999 were estimated from “Fuel Consumed” in Annual Survey of Industries (Ministry of Statistics &amp; Programme Implementation, <a href="http://www.csoisw.gov.in/cms/en/1023-annual-survey-of-industries.aspx">http://www.csoisw.gov.in/cms/en/1023-annual-survey-of-industries.aspx</a>) and those in 1999 were used before 1998.</li> </ul> </li> </ul> |
| Residential and other domestic sectors                   | <ul style="list-style-type: none"> <li>● Weighting factors and data sources: <ul style="list-style-type: none"> <li>➤ Factors for kerosene and LPG during 1983-1999 were estimated from TERI (2013, 2018) and those in 1983 were used before 1982. The factors in 2010 were estimated based on Census of India 2011 (Chandramouli, 2011) and used after 2011. Factors between 1999 and 2010 were interpolated.</li> <li>➤ Data of LPG were also used for natural gas. For other fuels, those of kerosene were used.</li> </ul> </li> </ul>                                                                                                                                                                                                         |

### S3.1.5 Regional fuel consumption data in Japan

REASv3 has 6 sub-regions for Japan as defined in Table 2.1 and the same as the case of India, fuel consumption data of country total based on IEAWEB need to be divided to each sub-region. Table 3.6 provides weighting factors used to allocate country total data to the 6 sub-regions.

**Table 3.6.** Weighting factors for allocating country total fuel consumption data to the 6 sub-regions in Japan.

| Sectors and fuel types               | Weighting factors and data sources                                                                                                                                                                                                                                                                                                                                                                                                                                                                                                                                                                                                                                                        |
|--------------------------------------|-------------------------------------------------------------------------------------------------------------------------------------------------------------------------------------------------------------------------------------------------------------------------------------------------------------------------------------------------------------------------------------------------------------------------------------------------------------------------------------------------------------------------------------------------------------------------------------------------------------------------------------------------------------------------------------------|
| Power plants including energy sector | <ul style="list-style-type: none"> <li>● Weighting factors: Total generation capacities in each region</li> <li>● Data sources: World Electric Power Plants Database (Platts, 2018)</li> </ul>                                                                                                                                                                                                                                                                                                                                                                                                                                                                                            |
| Non-ferrous metals                   | <ul style="list-style-type: none"> <li>● Weighting factors: Total amounts of copper, lead, zinc, and primary aluminum production for all fuel types</li> <li>● Data sources: See Sect. S4.1.2</li> </ul>                                                                                                                                                                                                                                                                                                                                                                                                                                                                                  |
| Road                                 | <ul style="list-style-type: none"> <li>● See Sect. S6.1</li> </ul>                                                                                                                                                                                                                                                                                                                                                                                                                                                                                                                                                                                                                        |
| Others                               | <ul style="list-style-type: none"> <li>● Weighting factors: <ul style="list-style-type: none"> <li>➢ Factors for each sector and fuel type during 1990-2015 were estimated using energy consumption statistics of each prefecture in corresponding years of 1990-2015.</li> <li>➢ Factors in 1990 were used for those before 1989.</li> </ul> </li> <li>● Data sources: <ul style="list-style-type: none"> <li>➢ Website of the Agency for National Resources and Energy <a href="https://www.enecho.meti.go.jp/statistics/energy_consumption/ec002/results.html">https://www.enecho.meti.go.jp/statistics/energy_consumption/ec002/results.html</a> (in Japanese)</li> </ul> </li> </ul> |

### S3.1.6 Fuel consumption in power plants

#### General methodology

In REASv3, power plants with following criteria were treated as point sources:

- Power plants which were treated as point sources in REASv2 (see Kurokawa et al., 2013).
- Power plants which entered commercial operation after 2008 and whose total generating capacities of units in each power plant were larger than 300MW.

Then, fuel consumption in power plants sector was estimated as follows:

- 1) Fuel consumption in each power plant (point source) was estimated. (see “Fuel consumption in each power plant” below)
- 2) (A) Total of the fuel consumption in each power plant was calculated in each country and region.
- 3) If (A) was larger than (B) fuel consumption in total power plant sector in a corresponding country and region, data of each power plants prepared in 1) were adjusted by the ratio of (B) to (A). In this case, fuel consumption of power plants as area sources was assumed to be zero.

- 4) IF (A) was smaller than (B), the value of (B) minus (A) was assumed to be fuel consumption in area sources. In this case, there is no change for the data of each power plant developed in 1).

### **Fuel consumption in each power plant**

In REASv2, power plants whose annual CO<sub>2</sub> emissions in the Carbon Monitoring for Action (CARMA) Database (Wheeler and Ummel, 2008) were more than 1 Mt in 2000 and/or 2007 were treated as point sources. Before 2007, REASv3 used the same power plants as point sources with some revisions for such as generation capacities, fuel types, etc. using the updated World Electric Power Plants Database (Platts, 2018). For fuel consumption, data between 2000 and 2007 were basically the same as those in REASv2. Before 2000, fuel consumption of each power plant in operation was assumed to be the same as that in 2000 which will be adjusted based on total fuel consumption in power plants sector as described in “General methodology” above. (Note that power plants which were constructed and retired before 2000 were not considered in REASv3.) After 2008, REASv3 included power plants which entered commercial operation after 2008 as new point sources based on the WEPP (see also “General methodology” above). Although major information was available including fuel types used in each power plant, there are no data of fuel consumption in the WEPP. Thus, in REASv3, annual fuel consumption per generation capacity for each fuel type was estimated first using data in 2000 and 2007 for each country. The data were estimated for power plants which started operation before 1999 and after 2000, separately. Then, using the generation capacities data obtained from the WEPP, fuel consumption in each power plant was estimated.

### **S3.1.7 Fuel consumption in non-metallic minerals**

REASv3 defined cement, lime, brick, and non-specified sub-sectors in the non-metallic minerals category in stationary combustion sources. However, energy statistics used in REASv3 including IEAWEB and regional statistical yearbook of China provide fuel consumption in total non-metallic minerals industry which needs to be distributed to each sub-sector.

In REASv3, all primary coal fuels were assumed to be used in cement, lime, and brick production. For China, Hua et al. (2016), Wang et al. (2012), and Streets et al. (2006) give coal consumption in cement (1980-2012), brick (1950-2015), and lime (2001) industries, respectively. Using these data and production amounts of cement, lime and brick, coal consumption per unit of production of cement, lime, and brick was estimated, respectively. Then, coal consumption data in non-metallic minerals in each region were distributed to each sub-sector based on production amounts of cement, lime, and brick in each region and corresponding coal consumption per unit of production. Similarly, Maithel (2013) provides coal consumption in cement and brick industries in Pakistan

during 2001-2010 and with production amounts of cement and brick, fuel consumption in non-metallic minerals industry were distributed to each sub-sector. For other countries, due to lack of information, averaged coal consumption per unit of production of cement, lime, and brick for China was used for other East and Southeast Asian countries. For other countries in South Asia, averaged coal consumption per unit of production of cement and brick for Pakistan and that of lime for China was used. Then, with production data of cement, lime, and brick, fuel consumption in non-metallic minerals were distributed to each sub-sector. See Sects. S4.1.3, S4.1.4, and S4.1.5 for production data of cement, lime, and brick, respectively.

For other fuels, in REASv3, coke oven coke and heavy fuel oil were assumed to be used in cement industry and others including gas fuels and diesel oil were allocated to the non-specified sub-sector.

### **S3.1.8 Biofuels**

#### **China**

CESY provides biofuel consumption data of fuelwood, crop residue, and biogas in each region during 1998-2007 which were used in REASv3. Before 1997, data were extended to 1980 using trends of each fuel consumption data in REASv1 and then extended to 1950 based on trends of biofuel consumption in East Asia obtained from Fernandes et al. (2007). After 2007, fuelwood, crop residue, and biogas consumption in total China were extrapolated to 2015 using trends of primary solid biofuels consumption in IEAWE. Then, consumption of each fuel in each region in 2007 were tentatively extrapolated to 2015 using trends of rural population numbers in each region. Finally, fuelwood, crop residue, and biogas consumption in total China estimated during 2008-2015 were distributed to each region using the tentatively extrapolated data in each region.

#### **India**

Primary solid biofuels in IEAWE were assumed to be total of fuelwood, crop residue and animal waste in India during 1971-2015. Before 1970, the primary solid biofuels consumption was extrapolated to 1950 using trends of biofuel consumption in South Asia obtained from Fernandes et al. (2007). Then, relative ratios of fuelwood, crop residue, and animal waste consumption in 17 sub-regions to consumption of the primary solid biofuels in total India were calculated for 1990 and 2010 using data in Streets and Waldhoff (1998) and Census of India 2011 (Chandramouli, 2011), respectively and interpolated between 1991 and 2009. Before 1989 and after 2011, the ratios of 1990 and 2010 were assumed to be constant, respectively. Finally, fuel consumption of fuelwood, crop residue, and animal waste in each sub-region during 1950-2015 were calculated.

## **Japan**

Primary solid biofuels consumption in IEAWEB were assumed to be fuelwood consumption in Japan during 1982-2015. Before 1981, as described in Sect. S3.1.2, fuel consumption in residential and paper, pulp and printing industry sectors was extrapolated to 1950 using the Historical Statistics of Japan (Japan Statistical Association, 2006) and trends of production amounts of paper and pulp in Japan, respectively.

## **Macau, Laos, Afghanistan, Bhutan, and Maldives**

See Sect. S3.1.2 for methodology and data sources. Only fuelwood and charcoal were included for this group.

## **Other countries**

Primary solid biofuels data in IEAWEB were assumed to be total of fuelwood, crop residue and animal waste consumption in each country and extrapolated to 1950 using trends of biofuel consumption in East or Southeast or South Asia obtained from Fernandes et al. (2007). For distribution to each fuel type, consumption ratios of fuelwood, crop residue, and animal waste in 1990 obtained from Streets and Waldhoff (1998) were used during 1950-2015.

## **S3.2 Emission factors and settings of emission controls**

### **S3.2.1 SO<sub>2</sub>**

#### **Sulfur contents in fuels**

In REASv3, default settings were taken from those of REASv1 during 1980-2000 generally based on RAINS ASIA at that time, Streets et al. (2000), Kato and Akimoto (1992) and Kato et al. (1991). For countries using default settings, data in 1980 and 2000 were used before 1979 and after 2001, respectively. For China, India, Japan, Republic of Korea, and Taiwan, additional country-specific settings were considered as described in Table 3.7.

**Table 3.7.** Settings and assumptions of sulfur contents in fuels for China, India, Japan, Republic of Korea, and Taiwan.

| Countries | Settings and assumptions                                                                                                                                                                                                                                                                                                                                                                                                                                                                                                                                                                                                                                                                                                                                                                                                                                                                                                                                                                                                                                                                                                                                                                                                                                  |
|-----------|-----------------------------------------------------------------------------------------------------------------------------------------------------------------------------------------------------------------------------------------------------------------------------------------------------------------------------------------------------------------------------------------------------------------------------------------------------------------------------------------------------------------------------------------------------------------------------------------------------------------------------------------------------------------------------------------------------------------------------------------------------------------------------------------------------------------------------------------------------------------------------------------------------------------------------------------------------------------------------------------------------------------------------------------------------------------------------------------------------------------------------------------------------------------------------------------------------------------------------------------------------------|
| China     | <ul style="list-style-type: none"> <li>● Coal: <ul style="list-style-type: none"> <li>➤ During 1985-2000: Data were taken from REASv1 based on Kato and Akimoto (1992) in 1985 and China Coal Industry Yearbook 2002 (State Administration for Coal Safety, 2003) in 1990 and 1995. In 2000, data in 1995 were adjusted so that the national average sulfur contents were 1.08% after Lu et al. (2010). Data in other years were interpolated.</li> <li>➤ During 2001-2005: Data were taken from REASv2 where settings of power plants in 2005 were based on Zhao et al. (2008) and national average sulfur contents were adjusted to 1.02% after Lu et al. (2010). Data between 2000 and 2005 were interpolated.</li> <li>➤ Before 1984 and after 2006, settings in 1980 and 2005 were used, respectively.</li> </ul> </li> <li>● Oil <ul style="list-style-type: none"> <li>➤ Before 1985, data were obtained from Kato et al. (1991) and those in 1995 were based on information from Tsinghua University (1.5% for heavy fuel oil and 0.58%, 0.35%, and 0.163% for diesel oil in north, northeast, and other areas, respectively) for REASv1. Data between 1986-1994 were interpolated and after 1996, data in 1995 were used.</li> </ul> </li> </ul> |
| India     | <ul style="list-style-type: none"> <li>● Data were taken from REASv1 based on Reddy and Venkataraman (2002) for coal, heavy fuel oil, and light fuels and Kato et al. (1991) for others. The same data were used for the entire target period of REASv3.</li> </ul>                                                                                                                                                                                                                                                                                                                                                                                                                                                                                                                                                                                                                                                                                                                                                                                                                                                                                                                                                                                       |
| Japan     | <ul style="list-style-type: none"> <li>● Coal: Data during 1960-1996 were taken from Li and Dai (2000). The value in 1960 was 1.06% and gradually decreased to 0.60% in 1996. It was assumed that the value was reduced by 10% from 1996 to 2010 referring a report of MOEJ (2012). Data between 1996 and 2010 were interpolated and those in 1960 and 2010 were used before 1959 and after 2011, respectively.</li> <li>● Heavy fuel oil and crude oil: Settings during 1965-2010 for power plants were based on Iwaya (2013). Those for industry were based on Kato et al. (1991), Streets et al. (2000), and Imura et al. (1999). Data</li> </ul>                                                                                                                                                                                                                                                                                                                                                                                                                                                                                                                                                                                                      |

|                              |                                                                                                                                                                                                                                                                                                                                                                                                                                                                                                                                                                                                                                                                                                                                                                                                                                                                                                                                                         |
|------------------------------|---------------------------------------------------------------------------------------------------------------------------------------------------------------------------------------------------------------------------------------------------------------------------------------------------------------------------------------------------------------------------------------------------------------------------------------------------------------------------------------------------------------------------------------------------------------------------------------------------------------------------------------------------------------------------------------------------------------------------------------------------------------------------------------------------------------------------------------------------------------------------------------------------------------------------------------------------------|
|                              | <p>in 1965 and 2010 were used before 1964 and after 2011, respectively.</p> <ul style="list-style-type: none"> <li>➤ Heavy fuel oil for power plants: The values before 1965 were 2.6% and decreased almost constantly to 0.80% in 1975. Then the values were gradually decreased to 0.75% in 1990 and the values was used after 1990.</li> <li>➤ Heavy fuel oil for industry: The values before 1965 were 2.60% and assumed to be decreased gradually to 1.4% in 1975, 1.1% in 1985, and 1.0% in 2000. The values after 2000 were assumed to be constant.</li> <li>➤ Crude oil for power plants: The value before 1965 were 2.8% and decreased almost linearly to 0.20% in 1975. After 1975, values were between 0.15% and 0.20%.</li> <li>● Diesel: Settings were based on regulations of diesel oil in Japan as follows: 1.2% before 1975, 0.50% during 1976-1991, 0.20% during 1992-1996, 0.05% during 1997-2003, and 0.005% after 2004.</li> </ul> |
| Republic of Korea and Taiwan | <ul style="list-style-type: none"> <li>● Data during 1980-2000 were taken from REASv1 based on Kato et al. (1991), RAINS ASIA, and Streets et a. (2000) and those in 1975 were obtained from Kato et al. (1991). Data between 1976-1981 were interpolated and those in 1975 and 2000 were used before 1974 and after 2001, respectively.</li> </ul>                                                                                                                                                                                                                                                                                                                                                                                                                                                                                                                                                                                                     |

### Emission factors

SO<sub>2</sub> emissions from coal and oil fuels were calculated using sulfur contents in fuels and ratios of sulfur emitted as SO<sub>2</sub>. Settings of REASv3 for the fraction of sulfur in the fuel that is emitted as SO<sub>2</sub> were taken from REASv1 and REASv2 based on Kato and Akimoto (1992), Kato et al. (1991) and RAINS ASIA as follows:

- Power plants (point sources): 0.95
- Power plants (area sources)): 0.90 for Japan, Republic of Korea, and Taiwan; 0.775 for other countries and regions.
- Industry sector: 0.775
- Coke ovens: 0.0685
- Iron and steel: 0.1483
- Transport sector: 0.775
- Domestic sector: 0.60
- Coke oven coke for all sectors: 0.885

- Oil fuels for all sectors: 1.0

For coke ovens, activity data are coal input and it is considered that the estimated SO<sub>2</sub> emissions include both combustion and non-combustion sources.

For gas fuels such as coke oven gas and blast furnace gas, light fuels such as LPG, and other fuels except for primary biofuels such as charcoal and municipal wastes, emission factors were derived from Kato and Akimoto (1991). Those for fuelwood and crop residue were taken from Garg et al. (2001) and those for animal waste were from Gadi et al. (2003).

In cement plants, effects of absorption of SO<sub>2</sub> by cements need to be considered. In REASv3, the absorption rates for China were obtained from Li et al. (2017) and those for other countries were based on Kato et al. (1991).

### Settings of emission controls

Settings and assumptions for reduction of SO<sub>2</sub> emissions from combustion sources by abatement equipment adopted in REASv3 are summarized in Table 3.8. For other sources not described in Table 3.8, no emission controls were considered.

**Table 3.8.** Settings and assumptions of emission controls of SO<sub>2</sub>

| Countries | Settings and assumption                                                                                                                                                                                                                                                                                                                                                                                                                                                                                                                                                                                                                                                                                                                                                                                                                                                                                                                                                                                                                                                                                                                                               |
|-----------|-----------------------------------------------------------------------------------------------------------------------------------------------------------------------------------------------------------------------------------------------------------------------------------------------------------------------------------------------------------------------------------------------------------------------------------------------------------------------------------------------------------------------------------------------------------------------------------------------------------------------------------------------------------------------------------------------------------------------------------------------------------------------------------------------------------------------------------------------------------------------------------------------------------------------------------------------------------------------------------------------------------------------------------------------------------------------------------------------------------------------------------------------------------------------|
| China     | <ul style="list-style-type: none"> <li>● Power plants: Effects of flue-gas desulfurization (FGD) were considered after 2000 as follows: <ul style="list-style-type: none"> <li>➢ Settings during 2000-2008 were taken from REASv2 based on national introduction rates of FGD from Lu et al. (2010) and those of each province from Zhao et al. (2008).</li> <li>➢ After 2008, increases of penetration of FGD were assumed referring Liu et al. (2015) and Li et al. (2017). In 2015, the introduction rates were assumed to be 100% in power plants considered as point sources and 90% for other power plants. Removal efficiencies of FGD units were assumed to be 0.75 before 2003 and 0.90 after 2010 and the values were interpolated during 2004-2009.</li> </ul> </li> <li>● Industry: Effects of FGD were roughly assumed as follows: <ul style="list-style-type: none"> <li>➢ Referring Li et al. (2017), it was assumed that regulations started from (A) Beijing and Shanghai, then (B) Shandong, Hebei, and Guangdong, and finally (C) other provinces.</li> <li>➢ Regulations of industrial boiler were strengthened after 2014</li> </ul> </li> </ul> |

|                   |                                                                                                                                                                                                                                                                                                                                                                                                                                                                                                                                                                                                                                                                                                                                                                                                                                                                                                                                                                                                                                                                                                                                                                                                                                                                                                                  |
|-------------------|------------------------------------------------------------------------------------------------------------------------------------------------------------------------------------------------------------------------------------------------------------------------------------------------------------------------------------------------------------------------------------------------------------------------------------------------------------------------------------------------------------------------------------------------------------------------------------------------------------------------------------------------------------------------------------------------------------------------------------------------------------------------------------------------------------------------------------------------------------------------------------------------------------------------------------------------------------------------------------------------------------------------------------------------------------------------------------------------------------------------------------------------------------------------------------------------------------------------------------------------------------------------------------------------------------------|
|                   | <p>referring Zheng et al. (2018).</p> <ul style="list-style-type: none"> <li>➤ For (A), it was assumed that introduction of FGD started from 2000 and penetration rates in 2010 were 40% which is a setting for China in 2020 in Business-as-usual scenario of Wang et al. (2014). For the penetration rates, linear trends were assumed during 2000-2013.</li> <li>➤ For (B) and (C), it was assumed that penetration of FGD started 2 and 4 years after (A), respectively and reduction effects were assumed to be smaller than (A) by 10% and 15%, respectively. It was assumed that removal efficiencies of FGD units were 0.75 for (A), 0.70 for (B) and 0.65 for (C).</li> <li>➤ In 2015, total reduction rates of SO<sub>2</sub> emissions were assumed to be 75%, 63%, and 52% for (A), (B), and (C), respectively.</li> </ul>                                                                                                                                                                                                                                                                                                                                                                                                                                                                           |
| Japan             | <ul style="list-style-type: none"> <li>● Power plants: Referring MRI (2015), Kato et al. (1991), and MOEJ (2000), effects of FGD were considered after 1968 as follows: <ul style="list-style-type: none"> <li>➤ In 1990 and after 2000, introduction rates of FGD in power plants as point sources were assumed to be 95% and 100%, respectively. It was assumed that removal efficiencies of FGD units were 0.95 after 1990. Trends of total reduction rates during 1968 and 1990 were assumed based on MOEJ (2000) and those between 1990 and 2000 were interpolated.</li> <li>➤ For introduction rates of FGD in power plants as area sources, it was assumed to be 95% after 2000 and the trends before 1990 were estimated based on those of point sources.</li> </ul> </li> <li>● Other sectors: Referring Kato et al. (1991), total reduction rates of SO<sub>2</sub> emissions were assumed as follows: <ul style="list-style-type: none"> <li>➤ For large industries including sulphuric acid plants, 80% of reduction rates of power plants as area sources were adopted.</li> <li>➤ For other industries, reduction rates were assumed to be 50% of large industries.</li> <li>➤ For commercial and public services, 50% of reduction rates of other industries were adopted.</li> </ul> </li> </ul> |
| Republic of Korea | <ul style="list-style-type: none"> <li>● Effects of FGD were roughly assumed as follows: <ul style="list-style-type: none"> <li>➤ Power plants: Referring Ebata et al. (1997) and Wang et al. (2014), it is assumed that introduction of FGD was from 1990. The penetration rates in power plants as point sources in 2000,</li> </ul> </li> </ul>                                                                                                                                                                                                                                                                                                                                                                                                                                                                                                                                                                                                                                                                                                                                                                                                                                                                                                                                                               |

|                 |                                                                                                                                                                                                                                                                                                                                                                                                                                                                                                                                                                                                                                                                                                                                                                                                                                               |
|-----------------|-----------------------------------------------------------------------------------------------------------------------------------------------------------------------------------------------------------------------------------------------------------------------------------------------------------------------------------------------------------------------------------------------------------------------------------------------------------------------------------------------------------------------------------------------------------------------------------------------------------------------------------------------------------------------------------------------------------------------------------------------------------------------------------------------------------------------------------------------|
|                 | <p>2005, and 2010 were 90%, 97%, and 98%, respectively. Data between 1990, 2000, 2005, and 2010 were interpolated and data in 2010 were used after 2011. Effects of FGD on power plants as area sources were assumed to be 5% lower than point sources. Removal efficiencies of FGD units were roughly assumed to be 0.90 in 1990 and 0.95 after 2000 and the values were interpolated during 1991-1999.</p> <p>➤ Industry: It was assumed that introduction of FGD started from 1990 and penetration rates of FGD were 80% and 85% in 2005 and 2010, respectively based on Wang et al. (2014). Data between 1990, 2005, and 2010 were interpolated and data in 2010 were used after 2011. It was assumed that removal efficiencies of FGD units were 0.95 for large industries and half of the values were adopted for other industries.</p> |
| Taiwan          | <ul style="list-style-type: none"> <li>● Effects of FGD were roughly assumed as follows: <ul style="list-style-type: none"> <li>➤ Power plants: Due to lack of information, the same reduction rates of Republic of Korea were adopted after 1995. But according to Ebata et al. (1997), introduction of FGD started earlier than Republic of Korea. It was assumed that penetration rates in 10% and 30% in 1980 and 1990, respectively and data between 1980, 1990, and 1995 were interpolated.</li> <li>➤ Industry: Similar to power plants, the same reduction rates of Republic of Korea were adopted after 2000 and it was assumed that introduction of FGD started from 1985. Data between 1985 and 2000 were interpolated.</li> </ul> </li> </ul>                                                                                     |
| Thailand        | <ul style="list-style-type: none"> <li>● Effects of FGD were assumed as follows: <ul style="list-style-type: none"> <li>➤ Power plants as point sources: Referring UN Environment (2018), reduction rates were assumed for four power plants as follows: Mae Moh (0.8-0.97 in 1978-2015), BLCP Power (0.84 from 2006), National Power Supply (0.75 from 1999), and GHECO-One (0.952 from 2012).</li> </ul> </li> </ul>                                                                                                                                                                                                                                                                                                                                                                                                                        |
| Other countries | <ul style="list-style-type: none"> <li>● Effects of FGD were assumed as follows: <ul style="list-style-type: none"> <li>➤ Power plants as point sources: Reduction rates (0.7-0.9) were assumed if units have information of installed FGD equipment in World Electric Power Plants Database (Platts, 2018).</li> <li>➤ Countries which have power plants with FGD and number of such</li> </ul> </li> </ul>                                                                                                                                                                                                                                                                                                                                                                                                                                  |

|  |                                                                                                                                                      |
|--|------------------------------------------------------------------------------------------------------------------------------------------------------|
|  | power plants in 2015 (in parentheses) in REASv3 were as follows: India (10), Indonesia (5), Laos (1), Malaysia (4), Vietnam (10), and Sri Lanka (2). |
|--|------------------------------------------------------------------------------------------------------------------------------------------------------|

### **S3.2.2 NO<sub>x</sub>**

#### **Default emission factors**

Table 3.9 summarized default emission factors used in REASv3 for fuel combustion in power plants, industry, and residential sectors. Specific settings for coke ovens, iron and steel industry, cement industry, and emission controls were described below the table.

**Table 3.9.** Default emission factors of NO<sub>x</sub> from fuel combustion in power plants, industry and residential sectors. Unit is t/PJ expressed as NO<sub>2</sub>.

| Fuel type                      | Power plants      | Industry         | Residential       |
|--------------------------------|-------------------|------------------|-------------------|
| Hard coal <sup>h</sup>         | 345 <sup>a</sup>  | 260 <sup>e</sup> | 78 <sup>g</sup>   |
| Raw coal <sup>i</sup>          | See Table 3.10.   | 203 <sup>f</sup> | 61.1 <sup>g</sup> |
| Cleaned coal <sup>i</sup>      |                   | 162 <sup>f</sup> | 48.5 <sup>g</sup> |
| Other washed coal <sup>i</sup> |                   | 509 <sup>f</sup> | 153 <sup>g</sup>  |
| Sub-bituminous coal            | 524 <sup>a</sup>  | A                | B                 |
| Lignite                        | 433 <sup>a</sup>  | A                | B                 |
| Coke oven coke <sup>j</sup>    | 345               | 260              | 78                |
| Natural gas                    | 105 <sup>b</sup>  | 53 <sup>b</sup>  | 37 <sup>b</sup>   |
| Gas works gas                  | 10.5 <sup>b</sup> | 7.4 <sup>b</sup> | 5.25 <sup>b</sup> |
| Coke oven gas                  | 77.8 <sup>b</sup> | 55 <sup>b</sup>  | 38 <sup>b</sup>   |
| Blast furnace gas              | 10.5 <sup>b</sup> | 7.4 <sup>b</sup> | 38 <sup>b</sup>   |
| LPG                            | 79 <sup>b</sup>   | 56 <sup>b</sup>  | 33 <sup>b</sup>   |
| Kerosene                       | 485 <sup>b</sup>  | 167 <sup>b</sup> | 25 <sup>b</sup>   |
| Diesel oil                     | 632 <sup>b</sup>  | 222 <sup>b</sup> | 74 <sup>b</sup>   |
| Crude oil                      | 249 <sup>b</sup>  | 145 <sup>b</sup> | 49 <sup>b</sup>   |
| Heavy fuel oil                 | 249 <sup>b</sup>  | 145 <sup>b</sup> | 49 <sup>b</sup>   |
| Fuelwood                       | 45 <sup>c</sup>   |                  |                   |
| Crop residue                   | 91.1 <sup>c</sup> |                  |                   |
| Animal waste                   | 91.1 <sup>c</sup> |                  |                   |
| Charcoal                       | 100 <sup>d</sup>  |                  |                   |

a. AP-42 (US EPA, 1995). b. Kato and Akimoto (1992). c. Streets and Waldhoff (1998), d. Revised 1996 IPCC guidelines (IPCC, 1997). e. Estimated based on ratios of emission factors between power plants and industry in Kato and Akimoto (1992). f. Estimated referring Zhang et al. (2007). g. 30% of emission factors of industry were adopted based on Kato and Akimoto (1992). h. Emission factors were commonly used for coking coal, anthracite and bituminous coal. i. Only defined for China. j. Emission factors for hard coal were adopted. A. Estimated based on ratios of emission factors between power plants and industry in Kato and Akimoto (1992) considering differences of net calorific values. B. 30% of emission factors of industry were adopted.

### **Coke ovens**

For coal input to coke ovens, emission factor was 1.0 t/kt taken from Kato and Akimoto (1992). It is considered that NO<sub>x</sub> emissions estimated using this emission factor include contributions from both combustion and non-combustion processes.

### **Iron and steel industry**

In iron and steel industry, emission factors for cokes, coke oven gas, and blast furnace gas were taken from Kato and Akimoto (1992) as follows:

- Coke oven coke: 4.0 t/kt for China and 2.5 t/kt for other countries
- Coke oven gas: 141 t/PJ
- Blast furnace gas: 76.4 t/PJ

For other fuel types, default emission factors were used.

### **Cement industry**

For China, emission factors of coal combustion in each cement kiln type were obtained from Lei et al. (2011a) as follows: 15.3 t/kt for precalciner kilns, 18.5 t/kt for other rotary kilns, and 1.7 t/kt for shaft kilns. Coal consumption in each cement kiln type were estimated based on Lei et al. (2011a) and Hua et al. (2016). For other fuel types, default emission factors in industry were used.

For Japan, NO<sub>x</sub> emissions were not estimated based on fuel consumption, but using amount of cement production in each kiln type. Emission factors (t/kt of clinker produced) were taken from AP-42 (US EPA, 1995) as follows: 3.7 for wet process kilns, 3.0 for long dry process kilns, 2.4 for preheater process kilns and 2.1 for preheater/precalciner kilns. Ratio of clinker to cement was assumed to be 0.85 based on Cement handbook (Japan Cement Association, 2019). (See Sect. S4.1.3 for production data by different kiln types.)

For other countries and regions, default emission factors in industry were used for all fuel types.

### **Settings of emission controls**

Settings and assumptions for reduction of NO<sub>x</sub> emissions from combustion sources by abatement equipment adopted in REASv3 are summarized in Table 3.10. For other sources not described in Table 3.10, no emission controls were considered.

**Table 3.10.** Settings and assumptions of emission controls of NO<sub>x</sub>

| Countries | Settings and assumption                                                                                                                                                                                                                                                                                                                                                                                                                                                                                                                                                                                                                                                                                                                                                                                                                                                                                                                                                                                                                                                                                                                                                                                                                                                                                                                                                                                                                                                                                                                                                                                                                                                      |
|-----------|------------------------------------------------------------------------------------------------------------------------------------------------------------------------------------------------------------------------------------------------------------------------------------------------------------------------------------------------------------------------------------------------------------------------------------------------------------------------------------------------------------------------------------------------------------------------------------------------------------------------------------------------------------------------------------------------------------------------------------------------------------------------------------------------------------------------------------------------------------------------------------------------------------------------------------------------------------------------------------------------------------------------------------------------------------------------------------------------------------------------------------------------------------------------------------------------------------------------------------------------------------------------------------------------------------------------------------------------------------------------------------------------------------------------------------------------------------------------------------------------------------------------------------------------------------------------------------------------------------------------------------------------------------------------------|
| China     | <ul style="list-style-type: none"> <li>● Power plants <ul style="list-style-type: none"> <li>➤ Referring Zhang et al. (2007) and Liu et al. (2015), emission factors [t/PJ] for coal fired power plants were assumed considering effects of low-NO<sub>x</sub> burner based on capacity and years as follows: <ul style="list-style-type: none"> <li>◇ 227: Larger than 300 MW or equal to 300 MW after 1995.</li> <li>◇ 300: Smaller than 300 MW but equal to or larger than 100 MW after 1997.</li> <li>◇ 393: Equal to 300 MW before 1995 or Smaller than 300 MW but equal to or larger than 100 MW before 1997.</li> <li>◇ 369: Less than 100 MW.</li> <li>◇ 300: Power plants as area sources (no information of capacity) before 2000. The values were assumed to be decreased by 10% until 2010 and by 15% until 2015.</li> </ul> </li> <li>➤ Penetration rates of selective catalytic reduction (SCR: efficiency 73%) and selective non-catalytic reduction (SNCR: efficiency 30%) for each province in 2011 were taken from Chen et al. (2014). Referring Chen et al. (2014), Li et al. (2017), and Zheng et al. (2018), national introduction rates were assumed to be 12%, 18%, and 75% in 2010, 2011, and 2015 and reduction rates for as point sources were estimated. For area sources, 50% of reduction rates of point sources were adopted.</li> </ul> </li> <li>● Industry <ul style="list-style-type: none"> <li>➤ Referring Li et al. (2017), effects of De-NO<sub>x</sub> system were considered for precalciner kilns in cement plants and penetration rates were roughly assumed to be 0% in 2010, 50% in 2014 and 90% in 2015.</li> </ul> </li> </ul> |
| Japan     | <ul style="list-style-type: none"> <li>● Power plants: Referring MRI (2015), JMF and ICETT (2003), and MOEJ (2000), effects of low-NO<sub>x</sub> burner and SCR were considered as follows: <ul style="list-style-type: none"> <li>➤ Effects of low-NO<sub>x</sub> burner were considered after 1970 and reduction efficiencies were assumed to be 15%, 35%, and 50% in 1975, 1980, and after 2005, respectively. Data between 1970, 1975, 1980, and 2005 were interpolated.</li> </ul> </li> </ul>                                                                                                                                                                                                                                                                                                                                                                                                                                                                                                                                                                                                                                                                                                                                                                                                                                                                                                                                                                                                                                                                                                                                                                         |

|                          |  |                                                                                                                                                                                                                                                                                                                                                                                                                                                                                                                                                                                                                                                                                                                                                                                                                                                                                                                                                                                                                                                                                                                                                                                                                                                                       |
|--------------------------|--|-----------------------------------------------------------------------------------------------------------------------------------------------------------------------------------------------------------------------------------------------------------------------------------------------------------------------------------------------------------------------------------------------------------------------------------------------------------------------------------------------------------------------------------------------------------------------------------------------------------------------------------------------------------------------------------------------------------------------------------------------------------------------------------------------------------------------------------------------------------------------------------------------------------------------------------------------------------------------------------------------------------------------------------------------------------------------------------------------------------------------------------------------------------------------------------------------------------------------------------------------------------------------|
|                          |  | <ul style="list-style-type: none"> <li>➤ Effects of SCR were considered after 1974 and introduction rates in coal, oil, and gas power plants as point sources were assumed to be 80%, 40%, and 72% in 2002 and 90%, 45%, and 80% after 2010, respectively. Trends of the introduction rates during 1974-2002 were assumed based on MOEJ (2000) and reduction rates during 2002-2010 were interpolated. For power plants as area sources, reduction rates were assumed to be 85% of point sources.</li> <li>● Industry: Effects of low-NO<sub>x</sub> burner and SCR were roughly assumed referring MRI (2015) and Kato et al. (1991) as follows: <ul style="list-style-type: none"> <li>➤ It was assumed that trends of introduction rates of low-NO<sub>x</sub> burner were the same as for those of power plants, but reduction efficiencies were 50% of those for power plants as point sources.</li> <li>➤ For large industries such as cement, iron and steel, it was assumed that trends of penetration rates of SCR were the same as those of power plants, but reduction efficiencies were 50% of those for power plants as point sources. For other industries, reduction rates were assumed to be 50% of those for large industries.</li> </ul> </li> </ul> |
| Republic of Korea/Taiwan |  | <ul style="list-style-type: none"> <li>● For power plants, introduction rates of low-NO<sub>x</sub> burner were 84% and 86% in 2005 and 2010, respectively and those of SCR (SNCR) were 56% (5%) and 68% (5%) in 2005, and 2010, respectively based on Wang et al. (2014). It was roughly assumed that low-NO<sub>x</sub> burner, SCR, and SNCR were installed from 1990 and their penetration rates in 2015 were 90%, 73%, and 5%, respectively. Reduction rates between 1990, 2005, 2010, and 2015 were interpolated.</li> <li>● Due to lack of information, the same settings for Republic of Korea were adopted to Taiwan.</li> </ul>                                                                                                                                                                                                                                                                                                                                                                                                                                                                                                                                                                                                                             |
| Others                   |  | <ul style="list-style-type: none"> <li>● Effects of low-NO<sub>x</sub> burner and De-NO<sub>x</sub> system were assumed as follows: <ul style="list-style-type: none"> <li>➤ Power plants as point sources: Reduction rates (0.3-0.5) were assumed if units have information of installed De-NO<sub>x</sub> system in World Electric Power Plants Database (Platts, 2018).</li> </ul> </li> <li>● Countries which have power plants with De-NO<sub>x</sub> equipment and number of such power plants in 2015 (in parentheses) in REASv3 were as follows: India (11), Indonesia (5), Malaysia (6), Philippines (4), Singapore (4), Thailand (9), Vietnam (4), Pakistan (1), and Sri Lanka (2).</li> </ul>                                                                                                                                                                                                                                                                                                                                                                                                                                                                                                                                                              |

### S3.2.3 CO

#### Default emission factors

Table 3.11 summarized default emission factors used in REASv3 for fuel combustion in power plants, industry and residential sectors. Specific settings for coal combustion and, iron and steel industry, cement and other non-metallic minerals industries were described below the table.

**Table 3.11.** Default emission factors of CO from fuel combustion in power plants, industry and residential sectors. Unit is t/PJ.

| Fuel type                      | Power plants       | Industry                                             | Residential       |
|--------------------------------|--------------------|------------------------------------------------------|-------------------|
| Hard coal <sup>e</sup>         | 20 <sup>a</sup>    | See “Emission factors for coal combustion”<br>below. |                   |
| Raw coal <sup>f</sup>          | 20 <sup>a</sup>    |                                                      |                   |
| Cleaned coal <sup>f</sup>      | 20 <sup>a</sup>    |                                                      |                   |
| Other washed coal <sup>f</sup> | 20 <sup>a</sup>    |                                                      |                   |
| Sub-bituminous coal            | 20 <sup>a</sup>    |                                                      |                   |
| Lignite                        | 20 <sup>a</sup>    |                                                      |                   |
| Coke oven coke                 | 20 <sup>a</sup>    | 150 <sup>a</sup>                                     | 2000 <sup>a</sup> |
| Natural gas                    | 20 <sup>a</sup>    | 30 <sup>a</sup>                                      | 50 <sup>a</sup>   |
| Gas works gas                  | 20 <sup>a</sup>    | 150 <sup>a</sup>                                     | 150 <sup>a</sup>  |
| Coke oven gas                  | 20 <sup>a</sup>    | 150 <sup>a</sup>                                     | 150 <sup>a</sup>  |
| Blast furnace gas              | 20 <sup>a</sup>    | 150 <sup>a</sup>                                     | 150 <sup>a</sup>  |
| LPG                            | 15 <sup>a</sup>    | 10 <sup>a</sup>                                      | 326 <sup>a</sup>  |
| Kerosene                       | 15 <sup>a</sup>    | 15 <sup>a</sup>                                      | 179 <sup>a</sup>  |
| Diesel oil                     | 15 <sup>a</sup>    | 15 <sup>a</sup>                                      | 20 <sup>a</sup>   |
| Crude oil                      | 15 <sup>a</sup>    | 15 <sup>a</sup>                                      | 20 <sup>a</sup>   |
| Heavy fuel oil                 | 15 <sup>a</sup>    | 15 <sup>a</sup>                                      | 20 <sup>a</sup>   |
| Fuelwood                       | 255.5 <sup>b</sup> | 2555 <sup>c</sup>                                    | 5110 <sup>d</sup> |
| Crop residue                   | 354.5 <sup>b</sup> | 3545 <sup>c</sup>                                    | 7090 <sup>d</sup> |
| Animal waste                   | 330 <sup>b</sup>   | 3300 <sup>c</sup>                                    | 6600 <sup>d</sup> |
| Charcoal                       | 400 <sup>b</sup>   | 4000 <sup>a</sup>                                    | 7000 <sup>a</sup> |

a. The global atmospheric pollution forum air pollutant emission inventory manual (SEI, 2012). b. Emission factors of power plants were assumed to be 10% of industry sector. c. Emission factors of industry sector were assumed to be 50% of residential sector. d. Streets and Waldhoff (1999). e. Emission factors were commonly used for coking coal, anthracite and bituminous coal. f. Only defined for China.

## **Emission factors for coal combustion**

### **(a) Industry sector except for cement and other non-metallic minerals industries**

Due to lack of information of detailed boiler and furnace types in industry sub-sectors in each country, CO emission factors of industry sector were roughly assumed in REASv3 as follows:

- 5.75 t/kt: average of emission factors for fluidized bed furnace and automatic stoker boiler based on AP-42 (US EPA, 1995).
  - Default emission factors for Japan, Republic of Korea, and Taiwan
  - Emission factors for large industries in China
- 18.6 t/kt: Emission factors for other industries in China estimated referring Streets et al. (2006) and data for fluidized bed furnace, automatic stoker, and hand-feed stoker in AP-42 (US EPA, 1995).
- 8.5 t/kt: Emission factors based on automatic stoker in AP-42 (US EPA, 1995) were adopted for large industries in other countries.
- 66.25 t/kt: Emission factors based on average of automatic stoker and hand-feed stoker in AP-42 (US EPA, 1995) for other industries in other countries.
- It was assumed that emission factors in China were decreased by 25% from 2000 to 2015 linearly assuming improvement in combustion efficiency.

### **(b) Residential sector**

Emission factors for China, India, and other countries were assumed as follows:

- 75 t/kt for China obtained from Streets et al. (2006) for stove in residential sector.
- 275 t/kt for India taken from Pandey et al. (2014) for traditional stove in residential sector.
- 2.61 kt/PJ for other countries as default emission factor derived from the global atmospheric pollution forum air pollutant emission inventory manual (SEI, 2012)

## **Coke production and iron and steel industry**

In REASv3, CO emissions from coke production and iron and steel industry were also estimated using production amounts of coke oven coke, sinter, pig iron, and crude steel (see Sects. S4.2.1 and S4.2.8). CO emission factors for coal consumption in coke ovens, those for coal and coke fuels in blast furnace, and coke furls and gas fuels in iron and industry sectors were assumed to be zero assuming their contributions were included in the emissions estimated based on production amounts described in Sects S4.2.1 and S4.2.8. These mean that CO emissions from combustion sources in coke production and iron and steel industry were not estimated separately in REASv3.

## **Cement industries**

For China, emission factors of coal combustion in each cement kiln type were obtained from Lei et al. (2011a) as follows: 17.8 t/kt for precalciner kilns, 17.8 t/kt for other rotary kilns, and 155.7 t/kt for shaft kilns. Coal consumption in each cement kiln type were estimated based on Lei et al. (2011a) and Hua et al. (2016). For other fuel types, default emission factors in industry were used.

For Japan, CO emissions were not estimated based on fuel consumption, but using amount of cement production in each kiln type. Emission factors (t/kt of clinker produced) were taken from AP-42 (US EPA, 1995) as follows: 0.06 for wet process kilns, 0.11 for long dry process kilns, 0.49 for preheater process kilns and 1.8 for preheater/precalciner kilns. Ratio of clinker to cement was assumed to be 0.85 based on Cement handbook (Japan Cement Association, 2019). (See Sect. S4.1.3 for production data by different kiln types.)

For other countries and regions, 63.8 t/kt were used for emission factors for coal consumption in cement industry based on average of emission factors for precalciner kilns, other rotary kilns, and shaft kilns taken from AP-42 (US EPA, 1995). For other fuel types, default emission factors in industry were used.

## **Other non-metallic minerals industries**

For lime industry, 155.7 t/kt were commonly used for coal combustion in all countries and default emission factors were used for other fuel types. For brick industry, 150 t/kt were used for coal combustion in China and default emission factors were adopted for Japan, Republic of Korea, and Taiwan. For other countries, emissions from brick industry were not estimated based on fuel combustion, but using amount of brick production. Emission factor 2.0 t/kt of brick produced was assumed based on Weyant et al. (2014) (See Sect. S4.2.5). For other sources, default emission factors were used.

### S3.2.4 PM species

#### Default emission factors

Tables 3.12-14 summarized default emission factors of PM<sub>10</sub>, PM<sub>2.5</sub>, BC, and OC used in REASv3 for fuel combustion in power plants, industry, and residential sectors (Note that emissions of PM species from gas fuels were neglected in REASv3). Specific settings for biofuels, iron and steel industry, cement and other non-metallic minerals industries were described below the table.

**Table 3.12.** Default emission factors of PM<sub>10</sub>, PM<sub>2.5</sub>, BC, and OC from fuel combustion in power plants. Unit is t/kt.

| Fuel type                      | PM <sub>10</sub>  | PM <sub>2.5</sub>  | BC                 | OC                  |
|--------------------------------|-------------------|--------------------|--------------------|---------------------|
| Hard coal <sup>f</sup>         | 12.0 <sup>a</sup> | 5.08 <sup>c</sup>  | 0.072 <sup>a</sup> | 0.0 <sup>a</sup>    |
| Raw coal <sup>g</sup>          | 46.0 <sup>b</sup> | 12.0 <sup>b</sup>  | 0.024 <sup>b</sup> | 0.0 <sup>b</sup>    |
| Cleaned coal <sup>g</sup>      | 46.0 <sup>b</sup> | 12.0 <sup>b</sup>  | 0.024 <sup>b</sup> | 0.0 <sup>b</sup>    |
| Other washed coal <sup>g</sup> | 46.0 <sup>b</sup> | 12.0 <sup>b</sup>  | 0.024 <sup>b</sup> | 0.0 <sup>b</sup>    |
| Sub-bituminous coal            | 29.0 <sup>a</sup> | 9.3 <sup>c</sup>   | 0.174 <sup>a</sup> | 0.0 <sup>a</sup>    |
| Lignite                        | 29.0 <sup>a</sup> | 9.3 <sup>c</sup>   | 0.174 <sup>a</sup> | 0.0 <sup>a</sup>    |
| Coke oven coke <sup>h</sup>    | 12.0              | 5.08               | 0.072              | 0.0                 |
| Diesel oil                     | 0.49 <sup>a</sup> | 0.186 <sup>d</sup> | 0.147 <sup>a</sup> | 0.0441 <sup>a</sup> |
| Crude oil <sup>i</sup>         | 1.1               | 0.775              | 0.088              | 0.033               |
| Heavy fuel oil                 | 1.1 <sup>a</sup>  | 0.775 <sup>d</sup> | 0.088 <sup>a</sup> | 0.033 <sup>a</sup>  |
| Fuelwood                       | 2.2 <sup>e</sup>  | 1.79 <sup>e</sup>  | 0.11 <sup>e</sup>  | 0.44 <sup>e</sup>   |
| Crop residue <sup>j</sup>      | 2.2               | 1.79               | 0.11               | 0.44                |
| Animal waste <sup>j</sup>      | 2.2               | 1.79               | 0.11               | 0.44                |
| Charcoal                       | 4.1 <sup>e</sup>  | 3.32 <sup>e</sup>  | 0.205 <sup>e</sup> | 0.82 <sup>e</sup>   |

a. Bond et al. (2004). b. Lei et al. (2011b). c. PM<sub>2.5</sub>/PM<sub>10</sub> ratios were estimated based on AP-42 (US EPA, 1995). d. PM<sub>2.5</sub>/PM<sub>10</sub> ratios were estimated based on Klimont et al. (2002b). e. Emission factors of PM<sub>10</sub>, BC, and OC for fuelwood and charcoal were taken from Bond et al. (2004). PM<sub>2.5</sub>/PM<sub>10</sub> ratios were estimated based on the global atmospheric pollution forum air pollutant emission inventory manual (SEI, 2012). f. Emission factors were commonly used for coking coal, anthracite and bituminous coal. g. Only defined for China. h. Emission factors for hard coal were adopted. i. Emission factors for heavy fuel oil were adopted. j. Emission factors for fuelwood were adopted.

**Table 3.13.** Default emission factors of PM<sub>10</sub>, PM<sub>2.5</sub>, BC, and OC from fuel combustion in industry sector. Unit is t/kt.

| Fuel type                      | PM <sub>10</sub>  | PM <sub>2.5</sub>  | BC                 | OC                  |
|--------------------------------|-------------------|--------------------|--------------------|---------------------|
| Hard coal <sup>f</sup>         | 4.2 <sup>a</sup>  | 1.79 <sup>c</sup>  | 0.84 <sup>a</sup>  | 0.168 <sup>a</sup>  |
| Raw coal <sup>g</sup>          | 7.21 <sup>b</sup> | 2.17 <sup>b</sup>  | 0.412 <sup>b</sup> | 0.0868 <sup>b</sup> |
| Cleaned coal <sup>g</sup>      | 7.21 <sup>b</sup> | 2.17 <sup>b</sup>  | 0.412 <sup>b</sup> | 0.0868 <sup>b</sup> |
| Other washed coal <sup>g</sup> | 7.21 <sup>b</sup> | 2.17 <sup>b</sup>  | 0.412 <sup>b</sup> | 0.0868 <sup>b</sup> |
| Sub-bituminous coal            | 17.0 <sup>a</sup> | 7.23 <sup>c</sup>  | 0.85 <sup>a</sup>  | 1.7 <sup>c</sup>    |
| Lignite                        | 17.0 <sup>a</sup> | 7.23 <sup>c</sup>  | 0.85 <sup>a</sup>  | 1.7 <sup>c</sup>    |
| Coke oven coke <sup>h</sup>    | 4.2               | 1.79               | 0.84               | 0.168               |
| Kerosene                       | 0.9 <sup>a</sup>  | 0.341 <sup>d</sup> | 0.117 <sup>a</sup> | 0.09 <sup>a</sup>   |
| Diesel oil                     | 0.49 <sup>a</sup> | 0.186 <sup>d</sup> | 0.147 <sup>a</sup> | 0.0441 <sup>a</sup> |
| Crude oil <sup>i</sup>         | 1.1               | 0.775              | 0.088              | 0.033               |
| Heavy fuel oil                 | 1.1 <sup>a</sup>  | 0.775 <sup>d</sup> | 0.088 <sup>a</sup> | 0.033 <sup>a</sup>  |
| Fuelwood                       | 6.1 <sup>e</sup>  | 4.95 <sup>e</sup>  | 0.555 <sup>e</sup> | 3.22 <sup>e</sup>   |
| Crop residue <sup>j</sup>      | 6.1               | 4.95               | 0.555              | 3.22                |
| Animal waste <sup>j</sup>      | 6.1               | 4.95               | 0.555              | 3.22                |
| Charcoal                       | 4.1 <sup>e</sup>  | 3.32 <sup>e</sup>  | 0.205 <sup>e</sup> | 0.82 <sup>e</sup>   |

a. Bond et al. (2004). b. Estimated based on Lei et al. (2011b) and Streets et al. (2006). c. PM<sub>2.5</sub>/PM<sub>10</sub> ratio was estimated based on the global atmospheric pollution forum air pollutant emission inventory manual (SEI, 2012). OC/BC ratio was assumed based on ABC Emission Inventory Manual (Shrestha et al., 2013). d. PM<sub>2.5</sub>/PM<sub>10</sub> ratios were estimated based on Klimont et al. (2002b). e. Emission factors of PM<sub>10</sub>, BC, and OC for fuelwood and charcoal were taken from Bond et al. (2004). PM<sub>2.5</sub>/PM<sub>10</sub> ratios were estimated based on the global atmospheric pollution forum air pollutant emission inventory manual (SEI, 2012). f. Emission factors were commonly used for coking coal, anthracite and bituminous coal. g. Only defined for China. h. Emission factors for hard coal were adopted. i. Emission factors for heavy fuel oil were adopted. j. Emission factors for fuelwood were adopted.

**Table 3.14.** Default emission factors of PM<sub>10</sub>, PM<sub>2.5</sub>, BC, and OC from fuel combustion in residential sector. Unit is t/kt.

| Fuel type                 | PM <sub>10</sub>  | PM <sub>2.5</sub> | BC                | OC                |
|---------------------------|-------------------|-------------------|-------------------|-------------------|
| Hard coal <sup>i</sup>    | 7.4 <sup>a</sup>  | 4.49 <sup>a</sup> | 1.02 <sup>a</sup> | 2.15 <sup>a</sup> |
| Raw coal <sup>j</sup>     | 8.82 <sup>b</sup> | 6.86 <sup>b</sup> | 1.56 <sup>b</sup> | 3.29 <sup>b</sup> |
| Cleaned coal <sup>j</sup> | 8.82 <sup>b</sup> | 6.86 <sup>b</sup> | 1.56 <sup>b</sup> | 3.29 <sup>b</sup> |

|                                |                                          |                                          |                                          |                                          |
|--------------------------------|------------------------------------------|------------------------------------------|------------------------------------------|------------------------------------------|
| Other washed coal <sup>j</sup> | 8.82 <sup>b</sup>                        | 6.86 <sup>b</sup>                        | 1.56 <sup>b</sup>                        | 3.29 <sup>b</sup>                        |
| Sub-bituminous coal            | 4.6 <sup>c</sup>                         | 2.79 <sup>c</sup>                        | 0.636 <sup>c</sup>                       | 1.334 <sup>c</sup>                       |
| Lignite                        | 4.6 <sup>c</sup>                         | 2.79 <sup>c</sup>                        | 0.636 <sup>c</sup>                       | 1.334 <sup>c</sup>                       |
| Coke oven coke <sup>k</sup>    | 7.4                                      | 4.49                                     | 1.02                                     | 2.15                                     |
| LPG                            | 0.52 <sup>d</sup>                        | 0.197 <sup>d</sup>                       | 0.0676 <sup>d</sup>                      | 0.052 <sup>d</sup>                       |
| Kerosene                       | 0.9 <sup>d</sup>                         | 0.341 <sup>d</sup>                       | 0.117 <sup>d</sup>                       | 0.09 <sup>d</sup>                        |
| Diesel oil                     | 0.49 <sup>d</sup>                        | 0.186 <sup>d</sup>                       | 0.147 <sup>d</sup>                       | 0.044 <sup>d</sup>                       |
| Crude oil <sup>l</sup>         | 1.1                                      | 0.775                                    | 0.088                                    | 0.033                                    |
| Heavy fuel oil                 | 1.1 <sup>d</sup>                         | 0.775 <sup>d</sup>                       | 0.088 <sup>d</sup>                       | 0.033 <sup>d</sup>                       |
| Fuelwood                       | 5.76 <sup>e</sup> ,<br>4.80 <sup>f</sup> | 5.58 <sup>e</sup> ,<br>4.60 <sup>f</sup> | 1.12 <sup>e</sup> ,<br>0.85 <sup>f</sup> | 4.46 <sup>e</sup> ,<br>3.20 <sup>f</sup> |
| Crop residue                   | 7.21 <sup>e</sup> ,<br>6.01 <sup>f</sup> | 6.98 <sup>e</sup> ,<br>5.75 <sup>f</sup> | 1.05 <sup>e</sup> ,<br>0.95 <sup>f</sup> | 3.98 <sup>e</sup> ,<br>3.70 <sup>f</sup> |
| Animal waste                   | 9.8 <sup>g</sup>                         | 9.8 <sup>g</sup>                         | 0.4 <sup>g</sup>                         | 3.1 <sup>g</sup>                         |
| Charcoal                       | 4.1 <sup>h</sup>                         | 3.32 <sup>h</sup>                        | 0.205 <sup>h</sup>                       | 0.82 <sup>h</sup>                        |

a. Estimated based on PM<sub>10</sub> emission factors for residential sectors in Bond et al. (2004) and ratios of PM<sub>2.5</sub>, BC, and OC to PM<sub>10</sub> in Lei et al. (2011b). b. Estimated based on emission factors for stove in Lei et al. (2011b). c. Emission factor for PM<sub>10</sub> derived from Bond et al. (2004) and ratios of PM<sub>2.5</sub>, BC, and OC to PM<sub>10</sub> were from those for hard coal. d. Bond et al. (2004) for PM<sub>10</sub>, BC, and OC and PM<sub>2.5</sub>/PM<sub>10</sub> ratios were estimated based on Klimont et al. (2002b). e. Estimated based on Lei et al. (2011b) and used for East Asian countries. f. Estimated based on Pandey et al. (2014) and used for Southeast and South Asian countries. g. Estimated based on Pandey et al. (2014) and commonly used for all countries. h. Emission factors of PM<sub>10</sub>, BC, and OC were taken from Bond et al. (2004). PM<sub>2.5</sub>/PM<sub>10</sub> ratios were estimated based on the global atmospheric pollution forum air pollutant emission inventory manual (SEI, 2012). i. Emission factors were commonly used for coking coal, anthracite and bituminous coal. j. Only defined for China. Values were gradually decreased from 1990 until their two third by 2005 referring Lei et al. (2011b). k. Emission factors for hard coal were adopted. l. Emission factors for heavy fuel oil were adopted.

### Coke production and iron and steel industry

The same as for CO, in REASv3, emissions of PM species from coke ovens were also estimated base on production amounts of coke oven coke (see Sect. S4.2.8). Emission factors of PM species for coal consumption in coke ovens were assumed to be zero assuming their contribution were included in the emissions estimated based on production amounts of coke described in Sect. S4.2.8. For China, emissions of PM species from iron and steel production were also estimated base on

production amounts of sinter, pig iron, and crude steel (see Sect. S4.2.1). It was assumed that emission factors for sinter and pig iron production obtained from Lei et al (2011b) include emissions from coal combustion. Therefore, emission factors of PM species for coal combustion in iron and steel industry were assumed to be zero for China.

### **Cement industry**

Emissions of PM species in China and Japan were not estimated based on fuel consumption, but using amount of cement production in each kiln type. For China, emission factors (t/kt of cement produced) of PM<sub>10</sub>/PM<sub>2.5</sub>/BC/OC were estimated based on Hua et al. (2016) and Lei et al. (2011a, b) as follows: 44.8/19.2/0.115/0.192 for precalciner kilns, 37.3/14.9/0.0894/0.149 for other rotary kilns, and 8.9/3.2/0.0192/0.032 for shaft kilns. For Japan, emission factors of PM<sub>10</sub>/PM<sub>2.5</sub>/BC/OC (t/kt of clinker produced) were taken from AP-42 (US EPA, 1995) and Kupiainen and Klimont (2004) as follows: 15.6/4.55/0.0273/0.0455 for wet process kilns, 35.9/15.4/0.0924/0.154 for long dry process kilns, 54.6/23.4/0.140/0.234 for preheater process kilns and preheater/precalciner kilns. Ratio of clinker to cement was assumed to be 0.85 based on Cement handbook (Japan Cement Association, 2019). (See Sect. S4.1.3 for production data by different kiln types.). For other countries and regions, default emission factors in industry were used for all fuel types. See Sect. S4.2.3 for non-combustion emissions from cement production.

### **Brick industry**

Emissions of PM species from brick production were not estimated based on fuel combustion, but using amount of brick production. Emission factors of PM<sub>10</sub>/PM<sub>2.5</sub>/BC/OC were assumed referring Lei et al. (2011b), Weyant et al. (2014), and Klimont et al. (2017) as follows:

- China: 0.71/0.27/0.108/0.0945 t/kt of brick produced
- Japan, Republic of Korea, and Taiwan: 0.473/0.18/0.002/0.0035 t/kt of brick produced
- Other countries: 0.5/0.19/0.15/0.007 t/kt of brick produced

## Settings of emission controls

Settings and assumptions for reduction of emissions of PM species from combustion sources by abatement equipment adopted in REASv3 are summarized in Table 3.15. For other sources not described in Table 3.15, no emission controls were considered. Note that the reduction rates of PM<sub>2.5</sub> were applied to BC and OC.

**Table 3.15.** Settings and assumptions of emission controls of PM species.

| Countries | Settings and assumption                                                                                                                                                                                                                                                                                                                                                                                                                                                                                                                                                                                                                                                                                                                                                                                                                                                                                                                                                                                                                                                                                                                                                                                                                                                                                                                                                                                                                                             |
|-----------|---------------------------------------------------------------------------------------------------------------------------------------------------------------------------------------------------------------------------------------------------------------------------------------------------------------------------------------------------------------------------------------------------------------------------------------------------------------------------------------------------------------------------------------------------------------------------------------------------------------------------------------------------------------------------------------------------------------------------------------------------------------------------------------------------------------------------------------------------------------------------------------------------------------------------------------------------------------------------------------------------------------------------------------------------------------------------------------------------------------------------------------------------------------------------------------------------------------------------------------------------------------------------------------------------------------------------------------------------------------------------------------------------------------------------------------------------------------------|
| China     | <ul style="list-style-type: none"> <li>● Power plants <ul style="list-style-type: none"> <li>➤ Effects of control technologies by cyclones, wet scrubbers, electrostatic precipitators (ESP), and fabric filters during 1990-2015 were estimated based on their penetration rates in Lei et al. (2011b) and Zhao et al. (2014).</li> <li>➤ Reduction rates of PM<sub>10</sub>/PM<sub>2.5</sub> were assumed to be 0.84/0.62, 0.92/0.78, and 0.98/0.94, and in 1990, 2000, and 2015, respectively. It was assumed that reduction rates before 1970 were zero and the values between 1970 and 1990 were interpolated.</li> </ul> </li> <li>● Industry <ul style="list-style-type: none"> <li>➤ Iron and steel industry: See Sect. S4.2.1</li> <li>➤ Coke ovens: See Sect. S4.2.8.</li> <li>➤ Non-ferrous metals industry: See Sect. S4.2.2</li> <li>➤ Cement industry: See Sect. S4.2.3.</li> <li>➤ Lime industry: See Sect. S4.2.4.</li> <li>➤ Brick industry: See Sect. S4.2.5.</li> <li>➤ Other industries: Due to lack of information, reduction rates were roughly assumed as follows: Reduction rates of PM<sub>10</sub> and PM<sub>2.5</sub> in 1990 were 0.55 and 0.25 referring settings of cement industry. Those in 2015 were 0.77 and 0.53 referring Wang et al. (2014) for settings of industry in 2010. It was assumed that reduction rates before 1980 were zero and the values between 1980, 1990, and 2015 were interpolated.</li> </ul> </li> </ul> |
| India     | <ul style="list-style-type: none"> <li>● Due to lack of information, referring Sadavarte and Venkataraman (2014), Pandey et al. (2014), Guttikunda and Jawahar (2014), and Reddy and Venkataraman (2002), reduction rates of PM<sub>10</sub>/PM<sub>2.5</sub> for power plants and industries during 1980-2015 were roughly assumed</li> </ul>                                                                                                                                                                                                                                                                                                                                                                                                                                                                                                                                                                                                                                                                                                                                                                                                                                                                                                                                                                                                                                                                                                                      |

|                          |  |                                                                                                                                                                                                                                                                                                                                                                                                                                                                                                                                                                                                                                                                                                                                                                                                                                                                                                                                                                                                                                                                                                                                                                                                                                                                                           |
|--------------------------|--|-------------------------------------------------------------------------------------------------------------------------------------------------------------------------------------------------------------------------------------------------------------------------------------------------------------------------------------------------------------------------------------------------------------------------------------------------------------------------------------------------------------------------------------------------------------------------------------------------------------------------------------------------------------------------------------------------------------------------------------------------------------------------------------------------------------------------------------------------------------------------------------------------------------------------------------------------------------------------------------------------------------------------------------------------------------------------------------------------------------------------------------------------------------------------------------------------------------------------------------------------------------------------------------------|
|                          |  | <p>as follows:</p> <ul style="list-style-type: none"> <li>➤ Power plants: 0.0/0.0, 0.45/0.40, 0.85/0.81, and 0.87/0.85 in 1980, 1985, 2000, and 2015, respectively. Values between 1980, 1985, 2000, and 2015 were interpolated.</li> <li>➤ Iron and steel and cement industries: 0.0/0.0, 0.47/0.46, and 0.85/0.83 in 1980, 1995, and 2015, respectively. Values between 1980, 1995, and 2015 were interpolated.</li> <li>➤ Other industries: 0.0/0.0, 0.40/0.30, and 0.45/0.40 in 1980, 1995, and 2015, respectively. Values between 1980, 1995, and 2015 were interpolated.</li> </ul>                                                                                                                                                                                                                                                                                                                                                                                                                                                                                                                                                                                                                                                                                                 |
| Japan                    |  | <ul style="list-style-type: none"> <li>● Referring MRI (2015) and other literatures such as Shimoda (2016), Suzuki (1990) and Goto (1981), following assumptions were considered for control equipment of PM species: <ul style="list-style-type: none"> <li>➤ Introduction of control equipment for power plants was expanded from 1957.</li> <li>➤ Introduction of bag filter was expanded from 1960.</li> <li>➤ From 1968, installation of ESP in power plants became mandatory.</li> <li>➤ Introduction of high quality ESP was expanded from 1975.</li> <li>➤ Regulations for PM species were strengthened from 1995.</li> </ul> </li> <li>● Based on above assumption, reduction rates of <math>PM_{10}/PM_{2.5}</math> for power plants were assumed as follows: 0.37/0.27, 0.9/0.88, and 0.995/0.99 in 1960, 1975, and after 2000, respectively. It was assumed that reduction rates before 1956 were zero and the values between 1950, 1960, 1975, and 2000 were interpolated.</li> <li>● For industry, reduction rates of <math>PM_{10}/PM_{2.5}</math> after 2000 were assumed to be 0.99/0.985 for iron and steel and cement industries and 0.98/0.96 for other industries. Trends between 1950 and 2000 were assumed to be the same as for those of power plants.</li> </ul> |
| Republic of Korea/Taiwan |  | <ul style="list-style-type: none"> <li>● Power plants: Based on Wang et al. (2014), reduction rates of <math>PM_{10}</math> and <math>PM_{2.5}</math> after 2005 were assumed to be 0.985 and 0.97, respectively. Referring Ebata et al. (1997), it was assumed that penetration rates of control equipment of PM species in 1990 were already high. Reduction rates in 1990 were assumed to be 0.9 and 0.88 for <math>PM_{10}</math> and <math>PM_{2.5}</math>, respective and zero before 1970. Values between 1970, 1990, and 2005 were interpolated.</li> </ul>                                                                                                                                                                                                                                                                                                                                                                                                                                                                                                                                                                                                                                                                                                                       |

|          |                                                                                                                                                                                                                                                                                                                                                                                                                                                                                                                                                                                                                                                                                                                                                                                                                                                                                                                                                                                                                                          |
|----------|------------------------------------------------------------------------------------------------------------------------------------------------------------------------------------------------------------------------------------------------------------------------------------------------------------------------------------------------------------------------------------------------------------------------------------------------------------------------------------------------------------------------------------------------------------------------------------------------------------------------------------------------------------------------------------------------------------------------------------------------------------------------------------------------------------------------------------------------------------------------------------------------------------------------------------------------------------------------------------------------------------------------------------------|
|          | <ul style="list-style-type: none"> <li>● Industry: Based on Wang et al. (2014), reduction rates of PM<sub>10</sub>/PM<sub>2.5</sub> in 2005 and in 2010 were assumed to be 0.944/0.905 and 0.948/0.910, respectively. It was roughly assumed that reduction rates of PM<sub>10</sub>/PM<sub>2.5</sub> in 2015 were 0.968/0.935, respectively and zero before 1970. Values between 1970, 2005, 2010, and 2015 were interpolated.</li> <li>● Due to lack of information, the same settings for Republic of Korea were adopted.</li> </ul>                                                                                                                                                                                                                                                                                                                                                                                                                                                                                                  |
| Thailand | <ul style="list-style-type: none"> <li>● Power plants: Referring Thao Pham et al. (2008), reduction rates of PM<sub>10</sub> and PM<sub>2.5</sub> in 2000 were assumed to be 0.84 and 0.80, respectively. For trends of reduction rates, it was roughly assumed that reduction rates of PM<sub>10</sub> and PM<sub>2.5</sub> were increased to 0.90 and 0.88 in 2015, respectively and zero before 1980. Values between 1980, 2000, and 2015 were interpolated.</li> <li>● Industry: Referring Thao Pham et al. (2008), for iron and steel and cement industries, reduction rates of PM<sub>10</sub> and PM<sub>2.5</sub> in 2005 were assumed to be 0.82 and 0.80, respectively. For trends of reduction rates, it was roughly assumed that reduction rates of PM<sub>10</sub> and PM<sub>2.5</sub> in 2015 were 0.85 and 0.83, respectively and zero before 1980. Values between 1980, 2000, and 2015 were interpolated. For other industries, 50% of reduction rates of iron and steel and cement industries were adopted.</li> </ul> |
| Others   | <ul style="list-style-type: none"> <li>● Due to lack of information, settings of Thailand during 1980-2005 were adopted for those of Indonesia, Malaysia, Myanmar, Philippines, Vietnam, and Mongolia during 1990-2015 and the same settings of Thailand were used for Singapore.</li> <li>● For Laos and Sri Lanka, reduction rates of 0.95/0.92 for PM<sub>10</sub>/PM<sub>2.5</sub> were used for large power plants equipped with ESP based on information from World Electric Power Plants Database (Platts, 2018),</li> </ul>                                                                                                                                                                                                                                                                                                                                                                                                                                                                                                      |

### S3.2.5 Other species and sources

#### NMVOC

Emission factors for fossil fuel combustion were taken from REASv2 based on Wei et al. (2008) for East Asian countries and the global atmospheric pollution forum air pollutant emission inventory manual (SEI, 2012) for Southeast and South Asian countries. For fuelwood, crop residue, and animal waste, emission factors were estimated as follows:

- Fuelwood
  - 3.13 t/kt based on Wei et al. (2008) for East Asian countries
  - 15.9 t/kt based on Sharma et al. (2015) for Southeast and South Asian countries
- Crop residue
  - 8.36 t/kt based on Wei et al. (2008) for East Asian countries
  - 13.3 t/kt based on Sharma et al. (2015) for Southeast and South Asian countries
- Animal waste
  - 10.4 t/kt based on Sharma et al. (2015) for all countries
- Charcoal
  - 100 t/PJ taken from IPCC (1997) for all countries

Emission factors described above were for total NMVOC. In REASv3, total NMVOC emissions were allocated to 19 NMVOC species categories defined in Sect. S2.1. The speciation was conducted based on speciation profiles for each sub-sector and fuel type provided by D. G. Streets (private communication) generally based on Klimont et al. (2002a) used for REASv1 and REASv2. The speciation profiles were commonly used for all countries and periods.

#### NH<sub>3</sub>

Emission factors for fossil fuel combustion were taken from REASv1 based on EMEP/CORINAIR Emission Inventory Guidebook (EEA, 1996). For biofuel, 1.29 t/kt for fuelwood and 0.97 t/kt for charcoal were obtained from ABC Emission Inventory Manual (Shrestha et al., 2013). Due to lack of information, the emission factor for fuelwood was adopted to crop residue and animal waste.

## **CO<sub>2</sub>**

Emission factors for fuel combustion except for fuelwood, crop residue, and animal wastes were obtained from 2006 IPCC Guidelines for National Greenhouse Gas Inventories (IPCC, 2006). Default emission factors were used except for those of coal combustion in China where lower values were adopted referring Guan et al. (2012). Emission factors for fuelwood, crop residue, and animal wastes were 83.1, 87.0, and 76.9 kt/PJ derived from Streets and Waldhoff (1999).

## **Agriculture**

For emissions from fuel combustion in agriculture sub-sector, emission factors of industry sector were used except for following settings for diesel oil referring Bond et al. (2004) and ABC Emission Inventory Manual (Shrestha et al., 2013):

- 50.3 t/kt for NO<sub>x</sub>
- 16.0 t/kt for CO
- 2.0 t/kt for PM<sub>10</sub>
- 1.72 t/kt for PM<sub>2.5</sub>
- 1.14 t/kt for BC
- 0.36 t/kt for OC

## **Charcoal production**

Activity data to estimate emissions from charcoal production as energy transformation sectors is wood input. Fuelwood consumption data developed based on methodologies described in Sect. S3.1 were used. Emission factors of NO<sub>x</sub>, CO, and NMVOC were taken from Revised 1996 IPCC guidelines (IPCC, 1997) and those of others were based on Akagi et al. (2011).

## **S4. Stationary non-combustion: Industrial production and other transformation**

Descriptions for evaporative NMVOC emissions and NH<sub>3</sub> emissions from non-combustion sources are provided in Sects. S5 and S8, respectively.

### **S4.1 Activity data**

#### **S4.1.1 Iron and steel production**

Activity data to estimate non-combustion emissions from iron and steel production industry in REASv3 are production amounts of pig iron, crude steel, sinter, and hot rolled products. National total production of pig iron, crude steel, and hot rolled products were obtained from Steel Statistical Yearbook (World Steel Association, <https://www.worldsteel.org/steel-by-topic/statistics/steel-statistical-yearbook.html>) during 1968-2015 and extrapolated to 1950 using trends of pig iron and crude steel production in Mitchell (1998). For crude steel, production data by each process, oxygen-blown converter, electric furnace, and open-hearth furnace were separately obtained. Sinter production data were taken from Steel Statistical Yearbook during 1977-1992. For China, sinter production data were available during 2000-2015 and those between 1992 and 2000 were interpolated. Then, missing data between 1950 and 2015 were estimated based on trends of pig iron production in each country.

For regional distribution in China, production amounts of steel during 1950-2015 and pig iron during 1983-2015 in each region were available in China Data Online and China Statistical Yearbook (National Bureau of Statistics of China, 1986-2016), respectively. Pig iron data before 1982 were extrapolated for each region using the trends of steel production in China Data Online. Then, using the steel data, production amounts of crude steel and hot rolled products in China total were distributed to each region. Similarly using the regional pig iron data, sinter and pig iron production amounts in whole China were distributed to each region. For India, ratios of crude steel production in 17 sub-regions were estimated using Minerals Yearbook (United States Geological Survey (USGS)) and Indiastat during 2000-2015. Using the regional data, production amounts of pig iron, crude steel, sinter, and hot rolled products in India total were distributed to each sub-region. For Japan, ratios of steel production amounts in 6 sub-regions during 2003 and 2011 were estimated using statistics of major factories (<https://www.japanmetaldaily.com/statistics/crudemateworks/details/index.html>) and production data of pig iron, crude steel, sinter, and hot rolled products in India total were distributed to each sub-region.

#### **S4.1.2 Non-ferrous metal production**

In REASv3, non-combustion emissions from copper, zinc, lead, and aluminum production were considered in non-ferrous metal production processes. Activity data were production amounts of primary copper, zinc, lead, alumina, aluminum, and secondary aluminum obtained from Minerals Yearbook during 1960-2015 (USGS) and extrapolated to 1950 using trends of corresponding production data in Mitchell (1998). For China, India, and Japan, national total data need to be distributed to each sub-region. Weighting factors for the distribution were estimated during 1995-2015 using annual generation capacities of major plants in Minerals Yearbook (USGS). Before 1994, the weighting factors for 1995 were used.

#### **S4.1.3 Cement production**

Activity data for non-combustion emissions from cement industry are production amounts of cement. For China, regional data were basically available in China Data Online during 1950-2015. However, not all regions had complete data during the period and sometimes interpolation and extrapolation procedures were necessary. Therefore, in REASv3, regional data were used for weighting factors to distribute national total data of cement production to each sub-region. For Japan, national cement production during 1990-2015 were obtained from Minerals Yearbook (USGS) and extrapolated to 1950 using trends of corresponding data in the Historical Statistics of Japan (Japan Statistical Association, 2006). For the distribution to each sub-region, first, weighting factors in 2004 and 2018 were estimated using production amounts by major cement plants. Then, those during 2005-2015 were interpolated and data in 2004 were used before 2003. In addition to total amounts, production data by different kiln types were available in China (Hua et al., 2016) and Japan (Japan Cement Association, <http://www.jcassoc.or.jp/cement/2eng/index.html>). For other countries, national total production during 1960-2015 were obtained from Minerals Yearbook (USGS). For extrapolation to 1950, in REASv3, trends of national CO<sub>2</sub> emissions from cement production taken from CDIAC (Carbon Dioxide Information Analysis Center) (Marland et al., 2008). For regional data in India, weighting factors during 1984 and 2009 were estimated using regional production data in TERI Energy & Environment Data Diary and Yearbook (TERI, 2013, 2018). Before 1983 and after 2010, data in 1984 and 2009 were used, respectively.

#### **S4.1.4 Lime production**

Activity data for non-combustion emissions from lime industry are production amounts of lime. Data were obtained from Minerals Yearbook during 1960-2015 (USGS) and were extrapolated to 1950 using trends of cement production estimated in REASv3.

#### **S4.1.5 Brick production**

Activity data for non-combustion emissions from brick industry are production amounts of brick. However, unlike the other products in non-metallic minerals industry, brick production data were not available in most international and national statistics. For Japan, national production data during 1950-2007 were taken from Hiragushi (2009) and Japan Statistical Yearbook (Statistics Bureau, 2010-2018) and were distributed to 6 sub-regions using total fuel consumption in non-metallic minerals sector. For other countries, first, default data were prepared taken from REASv2 and GAINS ASIA at that time during 1990-2015 and extrapolated to 1950 using trends of cement production in each country. For China, Vietnam, Bangladesh, India, and Pakistan, national production data in 1990, 2000, 2005, and 2010 were obtained from Klimont et al. (2017) and interpolated during 1990-2010 and extrapolated to 2015 using trends of the default data. For China, data between 1980-1990 were extrapolated based on trends of production in Zhang (1997) and those before 1980 were extrapolated using trends of the default data. For regional distribution, fuel consumption data in brick production in each region (see Sects. S3.1.3 and S3.1.7) were used for weighting factors. For India, data between 1983-1990 were extrapolated based on trends of production in Industrial Commodity Statistical Yearbook taken from UN data, which is a web-based data service of the UN (<http://data.un.org/>) and those before 1983 were extrapolated using trends of the default data. For regional distribution, common weighting factors during 1950-2015 were estimated based on Maithel et al. (2012). For Vietnam, Bangladesh, and Pakistan, data before 1990 were extrapolated using trends of the default data. For Nepal, production data in 2006 were obtained from Maithel (2013) and extrapolated during 1950-2015 using trends of the default data. For Rep. of Korea, Indonesia, Myanmar, the default data were used during 1990-2015 and before 1990, data were extrapolated to 1985 using trends of production in Industrial Commodity Statistical Yearbook and then extended to 1950 using trends of the default data. For other countries, the default data were directly used.

#### **S4.1.6 Sulphuric acid production**

Activity data to estimate non-combustion emissions from sulphuric acid plants are amounts of total sulphuric acid production in each country and region. For China, national total production data during 1950-2015 were obtained from China Data Online and distributed to each region using regional data during 1983-2015 in China Statistical Yearbook (National Bureau of Statistics of China, 1986-2016). Before 1983, data in 1983 were used as weighting factors for the regional distribution. For Japan, national production data were taken from statistics provided by the Sulphuric Acid Association of Japan (<http://www.ryusan-kyokai.org/>) during 1983-2015 and extrapolated to 1950 using trends of sulphuric acid production in Mitchell (1998). Weighting factors for regional distribution were estimated using annual generation capacities of major plants in 2015 in Minerals Yearbook (USGS). For other countries, national total production data were provided by the Sulphuric Acid Association of Japan during 1980-2015 and extrapolated to 1950 using trends of sulphuric acid production in Mitchell (1998). For India, national total data were distributed to 17 sub-regions using data of REASv2 during 2000-2008 based on GAINS ASIA at that time. For the weighting factors, data in 2000 and 2008 were used before 2000 and 2008, respectively.

#### **S4.1.7 Carbon black production**

In REASv3, non-combustion emissions from carbon black production were only considered for China, India, Japan, and, Rep. of Korea. Similar to brick production, default data were prepared taken from REASv2 and GAINS ASIA at that time during 1990-2015 and extrapolated to 1950 using GDP in each country and region. For GDP, regional data in China during 1950-2015 were obtained from China Data Online. For other countries, data during 1970-2015 were derived from UN data, which is a web-based data service of the UN (<http://data.un.org/>) and extrapolated to 1960 using OECD Data (<https://data.oecd.org/gdp/gross-domestic-product-gdp.htm>) and then extrapolated to 1950 using trends of total population.

For China, national total production in 2010 were obtained from Wei et al. (2011) and were extrapolated during 1950-2015 and distributed to each region using the default data as weighting factors. For India, national production data during 1983-2003 were taken from Industrial Commodity Statistical Yearbook taken from the UN data and similar to China, the data were extrapolated during 1950-2015 and distributed to each region using the default data. For Japan and Rep. of Korea, national production data during 1964-2014 were obtained from Mineral Yearbook (USGS) and extrapolated during 1950-2015 and data in Japan were distributed to 6 sub-regions using the default data.

#### **S4.1.8 Other transformation sectors**

##### **Coke ovens**

In REASv3, activity data to estimate emissions from coke ovens as energy transformation sectors are coal input for SO<sub>2</sub> and NO<sub>x</sub> and coke production for CO, NMVOC, CO<sub>2</sub>, and PM species. Coal consumption was taken from data developed based on methodologies described in Sect. S3.1. For coke production, national data were obtained from the International Energy Agency (IEA) World Energy Balances (IEA, 2017) during 1960-2015 for Japan and 1971-2015 for other countries. The data were extrapolated to 1950 based on trends of pig iron production before 1959 and 1970 for Japan and other countries, respectively. For China, regional production data during 1990-2015 were available in the China Energy Statistical Yearbook (CESY) (National Bureau of Statistics of China, 1986, 2001-2017) and used to distribute national total production data to each sub-region. Before 1990, data in 1990 were used. For India and Japan, weighting factors for the regional distribution were based on regional pig iron production data in each country.

##### **Petroleum refineries**

Activity data to estimate emissions from petroleum refineries as energy transformation sectors is crude oil input. Consumption data of crude oil developed based on methodologies described in Sect. S3.1 were used.

#### **S4.2 Emission factors and settings of emission controls**

##### **S4.2.1 Iron and steel production**

##### **Emission factors**

In REASv3, emissions of CO, NMVOC, CO<sub>2</sub>, and PM species were estimated using production amounts of sinter, pig iron, crude steel, and rolled steel. Default emission factors are summarized in Table 4.1 and emission factors of PM species for China are provided in Table 4.2. Note that emission factors of CO for all countries and those of PM species for China include contributions from both combustion and non-combustion emissions. (See also Sects. S3.2.3 and S3.2.4.)

**Table 4.1.** Default emission factors of CO, NMVOC, CO<sub>2</sub>, PM<sub>10</sub>, PM<sub>2.5</sub>, BC, and OC from production of sinter, pig iron, crude steel, and rolled steel. It was assumed that both combustion and non-combustion emissions are included in emission factors of CO. Unit is t/kt-produced.

|                                | Sinter            | Pig iron          | Crude steel/<br>OHF <sup>a</sup> | Crude steel/<br>BOF <sup>a</sup> | Crude steel/<br>EF <sup>a</sup> | Rolled steel |
|--------------------------------|-------------------|-------------------|----------------------------------|----------------------------------|---------------------------------|--------------|
| CO                             | 22.0 <sup>b</sup> | 40.5 <sup>c</sup> | 34.5 <sup>d</sup>                | 69.0 <sup>b</sup>                | 9.0 <sup>b</sup>                | -            |
| NMVOC <sup>e</sup>             | -                 | -                 | 0.055                            | 0.055                            | 0.055                           | 0.025        |
| CO <sub>2</sub> <sup>f</sup>   | -                 | -                 | -                                | -                                | 80.0                            | -            |
| PM <sub>10</sub> <sup>g</sup>  | 1.555             | 0.490             | 8.760                            | 14.63                            | 10.18                           | -            |
| PM <sub>2.5</sub> <sup>g</sup> | 0.691             | 0.300             | 6.330                            | 10.45                            | 7.550                           | -            |
| BC <sup>h</sup>                | 0.005             | 0.018             | -                                | -                                | -                               | -            |
| OC <sup>h</sup>                | 0.026             | -                 | -                                | 2.090                            | 0.180                           | -            |

a. OHF: Open-hearth furnace, BOF: Basic oxygen furnace, and EF: Electric furnace. b. AP-42 (US EPA, 1995), c. Streets et al. (2006), d. 50% of BOF was adopted. e. Klimont et al. (2002a). f. IPCC (2006). g. Klimont et al. (2002b). h. Kupiainen and Klimont (2004).

**Table 4.2.** Emission factors of PM<sub>10</sub>, PM<sub>2.5</sub>, BC, and OC from production of sinter, pig iron, crude steel, and rolled steel for China. It was assumed that both combustion and non-combustion emissions are included (except for emission factors of PM species for crude steel production). Unit is t/kt-produced.

|                                | Sinter | Pig iron | Crude steel/<br>OHF <sup>a</sup> | Crude steel/<br>BOF <sup>a</sup> | Crude steel/<br>EF <sup>a</sup> | Rolled steel |
|--------------------------------|--------|----------|----------------------------------|----------------------------------|---------------------------------|--------------|
| CO <sup>b</sup>                | 22.00  | 40.50    | 27.10 <sup>d</sup>               | 54.20                            | 9.000                           | -            |
| PM <sub>10</sub> <sup>c</sup>  | 6.050  | 9.650    | 19.10                            | 14.63                            | 8.120                           | -            |
| PM <sub>2.5</sub> <sup>c</sup> | 2.620  | 6.000    | 13.80                            | 10.45                            | 6.020                           | -            |
| BC <sup>c</sup>                | 0.0262 | 0.600    | 0.138                            | -                                | -                               | -            |
| OC <sup>c</sup>                | 0.131  | 0.120    | 0.690                            | 2.090                            | 0.120                           | -            |

a. OHF: Open-hearth furnace, BOF: Basic oxygen furnace, and EF: Electric furnace. b. Streets et al. (2006). c. Lei et al. (2011b). d. 50% of BOF was adopted.

For CO, the gas from blast furnace and basic oxygen furnace is collected and recycled in modern factories (Streets et al., 2006) and in REASv1, corresponding CO emissions in Japan were neglected. In REASv3, following settings were roughly assumed:

- China: Emission factors in Table 4.2 were used during 1950-2000 and 50% of the value was adopted in 2015. Emission factors between 2000 and 2015 were interpolated.
- Japan: Default emission factors were used before 1960 and 10% of the value was adopted after

1990. Emission factors between 1960 and 1990 were interpolated.

- Republic of Korea and Taiwan: Default emission factors were used before 1975 and 10% of the value was adopted after 2005. Emission factors between 1975 and 2005 were interpolated.

### Settings of emission controls

For iron and steel production, emission controls were only considered for PM species. Settings and assumptions for reduction of emissions in China by abatement equipment adopted in REASv3 are summarized in Table 4.3. For other countries, the same settings for combustion emissions in iron and steel industry were adopted. (See Table 3.15 in Sect. S3.2.4.)

**Table 4.3.** Settings and assumptions of emission controls of PM species for iron and steel production in China.

| Countries | Settings and assumption                                                                                                                                                                                                                                                                                                                                                                                                                                                                                                                                                                                                                                                                                                     |
|-----------|-----------------------------------------------------------------------------------------------------------------------------------------------------------------------------------------------------------------------------------------------------------------------------------------------------------------------------------------------------------------------------------------------------------------------------------------------------------------------------------------------------------------------------------------------------------------------------------------------------------------------------------------------------------------------------------------------------------------------------|
| China     | <ul style="list-style-type: none"> <li>● Referring Wu et al. (2017), reduction rates of PM<sub>10</sub>/PM<sub>2.5</sub> for sinter production, pig iron, BOF, and EF in 2000, 2005, 2010, and 2015 were assumed as follows <ul style="list-style-type: none"> <li>➢ Sinter: 0.780/0.592, 0.892/0.809, 0.946/0.916, and 0.956/0.939</li> <li>➢ Pig iron: 0.850/0.715, 0.910/0.844, 0.954/0.936, and 0.961/0.945</li> <li>➢ BOF: 0.850/0.715, 0.870/0.758, 0.955/0.937, and 0.959/0.943</li> <li>➢ EF: 0.782/0.568, 0.834/0.678, 0.900/0.815, and 0.977/0.968</li> </ul> </li> <li>● It was assumed that reduction rates were zero in 1980 and values between 1980, 2000, 2005, 2010, and 2015 were interpolated.</li> </ul> |

### S4.2.2 Non-ferrous metal production

In REASv3, emissions of SO<sub>2</sub>, PM<sub>10</sub>, and PM<sub>2.5</sub> were estimated using production amounts of copper, zinc, lead, and aluminum.

#### SO<sub>2</sub>

Default emission factors were taken from Kato and Akimoto (1992) as follows:

- Copper: 2.0 kt/kt- produced
- Zinc: 1.0 kt/kt-produced
- Lead: 0.32 kt/kt-produced

In some countries, SO<sub>2</sub> emitted from non-ferrous metal plants were collected and used for

materials of sulphuric acid. In that case, the amounts of collected SO<sub>2</sub> need to be reduced from SO<sub>2</sub> emissions calculated by default emission factors. In REASv3, amounts of sulphuric acid produced using SO<sub>2</sub> collected from non-ferrous metal plants were obtained from the Sulphuric Acid Association of Japan based on reports of International Fertilizer Industry Association, the British Sulphur Cooperation Limited, Sulphuric Acid Notebook of Japan, and Kato et al. (1991). In addition, the same reduction rates of SO<sub>2</sub> by emission control equipment for non-ferrous metal industry were adopted.

### **PM<sub>10</sub> and PM<sub>2.5</sub>**

Default emission factors t/kt-produced were obtained from Lei et al. (2011b) for China and Klimont et al. (2002b) for other countries as follows:

China:

- Copper, Zinc, and Lead: 276.0 for PM<sub>10</sub> and 246.0 for PM<sub>2.5</sub>
- Aluminum (primary): 26.51 for PM<sub>10</sub> and 18.28 for PM<sub>2.5</sub>
- Aluminum (secondary): 6.98 for PM<sub>10</sub> and 5.20 for PM<sub>2.5</sub>

Other countries:

- Copper, Zinc, and Lead: 13.8 for PM<sub>10</sub> and 12.3 for PM<sub>2.5</sub>
- Aluminum (primary): 27.26 for PM<sub>10</sub> and 18.5 for PM<sub>2.5</sub>
- Aluminum (secondary): 6.97 for PM<sub>10</sub> and 5.195 for PM<sub>2.5</sub>

For emission controls, the same settings for combustion emissions in industry sectors were adopted except for China. (See Table 3.15 in Sect. S3.2.4.) For China, reduction rates were assumed as follows:

- Referring Zhao et al. (2014), reduction rates of PM<sub>10</sub>/PM<sub>2.5</sub> in 2010 and 2015 were 0.910/0.882 and 0.945/0.906, respectively and values between 2010 and 2015 were interpolated.
- Trends of reduction rates between 1980 and 2010 were assumed to be the same as settings for combustion emissions in other industries. (See Table 3.15 in Sect. S3.2.4.)

### **S4.2.3 Cement production**

In REASv3, emissions of CO<sub>2</sub> and PM species for all countries and those of NO<sub>x</sub> and CO for Japan were estimated using production amounts of cement. For emission of NO<sub>x</sub> and CO in Japan and those of PM species in China and Japan, emission factors for combustion emissions were described in Sects. S3.2.2, S3.2.3 and S3.2.4, respectively. In this sub-section, emission factors for non-combustion emissions were described.

Default emission factor of CO<sub>2</sub> was 0.52 t/t-clinker produced based on IPCC (2006). Clinker to

cement ratios were roughly assumed as follows:

- China: 0.72 before 2005 and 0.6 in 2015 based on Gao et al. (2017). Values between 2005 and 2005 were interpolated.
- India: 0.83 before 1990 and 0.77 after 2005 based on Barcelo (2014). Values between 1990 and 2005 were interpolated.
- Japan: 0.85 base on Cement handbook (Japan Cement Association, 2019)
- Others: 0.9 before 1990 and 0.85 after 2005 based on Barcelo (2014). Values between 1990 and 2005 were interpolated.

For PM species, default emission factors of PM<sub>10</sub>, PM<sub>2.5</sub>, BC, and OC t/kt-produced were assumed as follows:

- China: 34.3, 9.8, 0.0588, and 0.098 were taken from Hua et al. (2016) and Lei et al. (2011a).
- Others: 16.0, 4.64, 0.0278, and 0.0464 were derived from AP-42 (US EPA, 1995) and Lei et al. (2011a).

For emission controls, the same settings for combustion emissions in cement industry were adopted except for China. (See Table 3.15 in Sect. S3.2.4.) For China, reduction rates were assumed as follows:

- Referring Hua et al. (2016), reduction rates of PM<sub>10</sub>/PM<sub>2.5</sub> during 1980-2012 were estimated for each year. Values were 0.565/0.218, 0.586/0.250, 0.746/0.527, and 0.973/0.916 in 1980, 1990, 2000, and 2012, respectively.
- It was roughly assumed that reduction rates of PM<sub>10</sub>/PM<sub>2.5</sub> in 2015 were 0.98/0.97 and zero in 1975. Values between 1975 and 1980 and those between 2010 and 2015 were interpolated.

#### **S4.2.4 Lime production**

In REASv3, emissions of CO<sub>2</sub> and PM species were estimated using production amounts of lime. Default emission factors of CO<sub>2</sub> were taken from IPCC (2006) and those of PM species were derived from Klimont et al. (2002b) and Kupiainen and Klimont (2004) as follows:

- CO<sub>2</sub>: 750 t/kt-produced
- PM<sub>10</sub>: 12.0 t/kt-produced
- PM<sub>2.5</sub>: 1.4 t/kt-produced
- BC: 0.028 t/kt-produced
- OC: 0.014 t/kt-produced

For emission controls of PM species, the same settings for combustion emissions in industry sectors were adopted except for China. (See Table 3.15 in Sect. S3.2.4.) For China, reduction rates were assumed as follows:

- Referring Zhao et al. (2014), reduction rates of PM<sub>10</sub>/PM<sub>2.5</sub> in 2010 and 2015 were 0.766/0.670

and 0.782/0.697, respectively and values between 2010 and 2015 were interpolated.

- Trends of reduction rates between 1985 and 2010 were assumed to be the same as settings between 1980 and 2005 for combustion emissions in other industries. (See Table 3.15 in Sect. S3.2.4.)

#### **S4.2.5 Brick production**

In REASv3, emissions of CO and PM species were estimated using production amounts of brick.

For CO, note that emissions in China, Japan, Republic of Korea, and Taiwan were estimated using fuel consumption as described in Sect. S3.2.3. For other countries, emissions were estimated with production amounts of brick and emission factor 2.0 t/kt-produced was taken from Weyan et al. (2014).

For PM species, default emission factors of PM<sub>10</sub>, PM<sub>2.5</sub>, BC, and OC t/kt-produced were assumed as follows:

- China: 0.71, 0.27, 0.108, and 0.0945 were taken from Lei et al. (2011b).
- Japan, Republic of Korea, and Taiwan: Emission factors of tunnel kiln 0.4773, 0.18, 0.002, and 0.0035 were obtained from Klimont et al. (2017).
- Others: Emission factors of Bull's trench kiln 0.5, 0.19, 0.15, and 0.007 were based on Weyant et al. (2014).

For emission controls of PM species, the same settings for combustion emissions in industry sectors were adopted except for China. (See Table 3.15 in Sect. S3.2.4.) For China, reduction rates were assumed as follows:

- Referring Zhao et al. (2014), reduction rates of PM<sub>10</sub>/PM<sub>2.5</sub> in 2010 and 2015 were 0.425/0.208 and 0.362/0.143, respectively and values between 2010 and 2015 were interpolated.
- Trends of reduction rates between 1985 and 2010 were assumed to be the same as settings for combustion emissions in other industries. (See Table 3.15 in Sect. S3.2.4.)

#### **S4.2.6 Sulphuric acid production**

In REASv3, emissions of SO<sub>2</sub> were estimated using production amounts of sulphuric acid. Default emission factors were taken from Kato et al. (1991) as follows:

- 20.0 t/kt-produced for China, Japan, Republic of Korea, and Taiwan
- 33.0 t/kt-produced for other countries.

For emission controls, the same settings for combustion emissions in large industries were adopted for Japan, Republic of Korea, and Taiwan and those for other industries were applied for China. For other countries, no emission controls were considered.

#### **S4.2.7 Carbon black production**

In REASv3, emissions of NMVOC and PM species were estimated using production amounts of carbon black. Default emission factor of NMVOC was taken from Klimont et al. (2002a) and those of PM species were derived from Klimont et al. (2002b) and Kupiainen and Klimont (2004) as follows:

- NMVOC: 90 t/kt-produced
- PM<sub>10</sub>: 1.60 t/kt-produced
- PM<sub>2.5</sub>: 1.44 t/kt-produced
- BC: 1.10 t/kt-produced
- OC: 0.00 t/kt-produced

For emission controls of PM species, the same settings for combustion emissions in industry sectors were adopted for all countries. (See Table 3.15 in Sect. S3.2.4.)

#### **S4.2.8 Other transformation sectors**

##### **Coke ovens**

In REASv3, emissions of CO, NMVOC, CO<sub>2</sub>, and PM species were estimated using production amounts of coke oven coke.

For CO, emission factors were taken from Streets et al. (2006) as follows:

- 1.6 t/kt-produced for machinery coke ovens
- 15.6 t/kt-produced for indigenous coke ovens

Production amounts of coke oven coke in different technologies were only considered for China. Ratios of production amounts between machinery and indigenous coke ovens in each province in 2005 and 2006 were taken from China Industrial Economy Statistics Yearbook (National Bureau of Statistics, 2006-2007) and were extrapolated based on national ratios during 1990-2011 obtained from Huo et al. (2012a). It was roughly assumed that ratios of machinery coke ovens in 1970 were zero and gradually increased from 2011 to 2015. Data between 1970 and 1990 were interpolated. Due to lack of information, emission factors for machinery coke ovens were adopted for all other countries. As described in Sect. S3.2.3, emission factors were assumed to include contribution from combustion emissions.

Default emission factors of NMVOC was taken from Klimont et al. (2002a) and that of CO<sub>2</sub> was obtained from IPCC (2006) as follows:

- NMVOC: 1.44 t/kt-produced
- CO<sub>2</sub>: 560 t/kt-produced

For PM species, default emission factors of PM<sub>10</sub>, PM<sub>2.5</sub>, BC, and OC t/kt-produced were assumed as follows:

- China: 8.79, 5.22, 1.57, and 1.83 were taken from Lei et al. (2011b).
- Others: 3.36, 2.00, 0.75, and 0.54 were taken from Klimont et al. (2002b) and Kupiainen and Klimont (2004).

As described in Sect. S3.2.4, emission factors were assumed to include contribution from combustion emissions. For emission controls of PM species, the same settings for combustion emissions in iron and steel industry were adopted except for China. (See Table 3.15 in Sect. S3.2.4.)

For China, reduction rates were assumed as follows:

- Referring Zhao et al. (2014), reduction rates of PM<sub>10</sub>/PM<sub>2.5</sub> in 2010 and 2015 were estimated for machinery and indigenous coke ovens as follows:
  - Machinery: 0.773/0.560 and 0.803/0.624 in 2010 and 2015, respectively.
  - Indigenous: 0.193/0.140 and 0.200/0.156 in 2010 and 2015, respectively.
  - Values between 2010 and 2015 were interpolated.
- Trends of reduction rates between 1985 and 2010 were assumed to be the same as settings for combustion emissions in other industries. (See Table 3.15 in Sect. S3.2.4.)

### **Petroleum refineries**

In REASv3, emissions of SO<sub>2</sub>, NMVOC and PM species were estimated using consumption amounts of crude oil in oil refinery industry. Default emission factors were derived from Kato and Akimoto (1992) for SO<sub>2</sub>, Klimont et al. (2002a) for NMVOC, Klimont et al. (2002b) and Kupiainen and Klimont (2004) for PM species as follows:

- SO<sub>2</sub>: 0.46S t/kt (S: Sulfur contents in fuel in wt%)
- NMVOC: 2.34 t/PJ
- PM<sub>10</sub>: 1.20 t/kt
- PM<sub>2.5</sub>: 0.96 t/kt
- BC: 0.00015 t/kt
- OC: 0.00 t/kt

For emission controls of SO<sub>2</sub> and PM species, the same settings for combustion emissions in industry sectors were adopted for all countries. (See Table 3.15 in Sect. S3.2.4.)

#### **S4.2.9 Speciation of NMVOC emissions**

Emission factors described in Sect. S4.2 were for total NMVOC. In REASv3, total NMVOC emissions were allocated to 19 NMVOC species categories defined in Sect. S2.1. The speciation was conducted based on speciation profiles for each sub-sector provided by D. G. Streets (private communication) generally based on Klimont et al. (2002a) used for REASv1 and REASv2. The speciation profiles were commonly used for all countries and periods.

## S5. Non-combustion sources of NMVOC

In this section, activity data, emission factors, and their sources used to estimate evaporative NMVOC emissions in REASv3 are described. See Sect. S2.4.3 for sub-sector categories defined in REASv3. For Japan, NMVOC emissions from evaporative sources were derived from the Ministry of the Environment Japan (MEOJ, 2017a) and thus, activity data and emission factors of Japan were not compiled in REASv3 (see Sect. S5.3.1 for Japan).

### S5.1 Activity data

In REASv3, activity data of REASv2 during 2000-2008 estimated based on Klimont et al. (2002a) were used as “default”.

#### S5.1.1 Extraction processes

In REASv3, emissions from gas production and distribution, oil production and handling, petroleum refineries, service stations, and transport and depots are included in those from extraction processes. Data sources and treatments of activity data for each sub-sector category used in REASv3 were summarized in Table 5.1.

**Table 5.1.** Data sources and treatments of activity data for sub-sectors of extraction processes.

| Sub-sector categories           | Data sources and treatments of activity data                                                                                                                                                                                                                                                                                                                                                                                                                                                                                                                                                                                                                                                                                                                                                                                                                                                   |
|---------------------------------|------------------------------------------------------------------------------------------------------------------------------------------------------------------------------------------------------------------------------------------------------------------------------------------------------------------------------------------------------------------------------------------------------------------------------------------------------------------------------------------------------------------------------------------------------------------------------------------------------------------------------------------------------------------------------------------------------------------------------------------------------------------------------------------------------------------------------------------------------------------------------------------------|
| Gas production and distribution | <ul style="list-style-type: none"><li>● Activity data: Natural gas production</li><li>● Data sources and treatments:<ul style="list-style-type: none"><li>➤ China: Regional data during 1985-2015 were taken from the China Energy Statistical Yearbook (CESY) (National Bureau of Statistics of China, 1986, 2001-2017). Before 1985, data were extrapolated to 1971 using the International Energy Agency (IEA) World Energy Balances (IEAWEB) (IEA, 2017) and to 1950 using Mitchell (1998).</li><li>➤ India: National total data were obtained from IEAWEB and extrapolated to 1950 using Mitchell (1998). For regional distribution, weighting factors were calculated using regional data taken from TERI (2013, 2018).</li><li>➤ Other countries: National total data were derived from IEAWEB or the United Nations (UN) Energy Statistics Database (UN, 2016) and</li></ul></li></ul> |

|                                   |                                                                                                                                                                                                                                                                                                                                                                                                                                                                                                                                                                                                                                                                       |
|-----------------------------------|-----------------------------------------------------------------------------------------------------------------------------------------------------------------------------------------------------------------------------------------------------------------------------------------------------------------------------------------------------------------------------------------------------------------------------------------------------------------------------------------------------------------------------------------------------------------------------------------------------------------------------------------------------------------------|
|                                   | extrapolated to 1950 using Mitchel (1998).                                                                                                                                                                                                                                                                                                                                                                                                                                                                                                                                                                                                                            |
| Crude oil production and handling | <ul style="list-style-type: none"> <li>● Activity data: Crude oil production</li> <li>● Data sources and treatments: <ul style="list-style-type: none"> <li>➤ China: Regional data during 1950-2015 were derived from China Data Online.</li> <li>➤ India: National total data were obtained from IEAWEB and extrapolated to 1950 using Mitchel (1998). For regional distribution, weighting factors were calculated using regional data taken from TERI (2013, 2018).</li> <li>➤ Other countries: National total data were derived from IEAWEB or the UN Energy Statistics Database (UN, 2016) and extrapolated to 1950 using Mitchel (1998).</li> </ul> </li> </ul> |
| Petroleum refineries              | <ul style="list-style-type: none"> <li>● Activity data: Consumption of crude oil in petroleum refineries</li> <li>● Data sources and treatments: See Sect. S3.1.</li> </ul>                                                                                                                                                                                                                                                                                                                                                                                                                                                                                           |
| Service stations                  | <ul style="list-style-type: none"> <li>● Activity data: Consumption of gasoline in road transport sector</li> <li>● Data sources and treatments: See Sect. S3.1.</li> </ul>                                                                                                                                                                                                                                                                                                                                                                                                                                                                                           |
| Transport and depots              | <ul style="list-style-type: none"> <li>● Activity data: Consumption of gasoline and diesel in road transport sector</li> <li>● Data sources and treatments: See Sect. S3.1.</li> </ul>                                                                                                                                                                                                                                                                                                                                                                                                                                                                                |

### S5.1.2 Solvent use

In this sub-section, activity data of NMVOC evaporative emissions from solvent use except for printing (See Sect. S5.1.3) and paint application (See Sect. S5.1.4) were described. Data sources and treatments of activity data for each sub-sector category used in REASv3 were summarized in Table 5.2. (See Sect. S4.1.7 for data sources of GDP used in this sub-section.)

**Table 5.2.** Data sources and treatments of activity data for sub-sectors of solvent use.

| Sub-sector categories | Data sources and treatments of activity data                                                                                                                                                                                                                                                                                                                                                                                                          |
|-----------------------|-------------------------------------------------------------------------------------------------------------------------------------------------------------------------------------------------------------------------------------------------------------------------------------------------------------------------------------------------------------------------------------------------------------------------------------------------------|
| Dry cleaning          | <ul style="list-style-type: none"> <li>● Activity data: Textiles cleaned</li> <li>● Data sources and treatments: <ul style="list-style-type: none"> <li>➤ China: National total data in 2012 were taken from Wu et al. (2016) and extrapolated during 1950-2015 using trends of GDP. For regional distribution, urban population (see descriptions for domestic use of solvents in this table) were used as weighting factors.</li> </ul> </li> </ul> |

|                          |                                                                                                                                                                                                                                                                                                                                                                                                                                                                                                                                                                                                                                                                                                                                                                                                                                                                                                                                                                                                                                                                                                                                                            |
|--------------------------|------------------------------------------------------------------------------------------------------------------------------------------------------------------------------------------------------------------------------------------------------------------------------------------------------------------------------------------------------------------------------------------------------------------------------------------------------------------------------------------------------------------------------------------------------------------------------------------------------------------------------------------------------------------------------------------------------------------------------------------------------------------------------------------------------------------------------------------------------------------------------------------------------------------------------------------------------------------------------------------------------------------------------------------------------------------------------------------------------------------------------------------------------------|
|                          | <ul style="list-style-type: none"> <li>➤ India: National data in 2010 were based on Sharma et al. (2015) and extrapolated during 1950-2015 using trends of GDP. For regional distribution, urban population were used as weighting factors.</li> <li>➤ Other countries: Default data were used and extrapolated during 1950-2015 using trends of GDP.</li> </ul>                                                                                                                                                                                                                                                                                                                                                                                                                                                                                                                                                                                                                                                                                                                                                                                           |
| Degreasing operation     | <ul style="list-style-type: none"> <li>● Activity data: Solvent used</li> <li>● Data sources and treatments: <ul style="list-style-type: none"> <li>➤ China: National total data in 2005 were taken from Wei et al. (2008). Regional distribution and extrapolation during 1950-2015 were conducted based on GDP.</li> <li>➤ Other countries and regions: Default data were used during 2000-2008 and extrapolated during 1950-2015 using trends of GDP.</li> </ul> </li> </ul>                                                                                                                                                                                                                                                                                                                                                                                                                                                                                                                                                                                                                                                                            |
| Vehicle treatment        | <ul style="list-style-type: none"> <li>● Activity data: Cars registered</li> <li>● Data sources and treatments: See Sect. S6.1.1.</li> </ul>                                                                                                                                                                                                                                                                                                                                                                                                                                                                                                                                                                                                                                                                                                                                                                                                                                                                                                                                                                                                               |
| Domestic use of solvents | <ul style="list-style-type: none"> <li>● Activity data: Urban and rural population</li> <li>● Data sources and treatments: <ul style="list-style-type: none"> <li>➤ China: National and regional total population were obtained from China Data Online. Regional urban population data were calculated using proportion of urban population during 2005-2015 in China Statistical Yearbook (National Bureau of Statistics of China, 1986–2016) and the proportion data in 2005 for each region were used to estimated urban population before 2004. Then rural population in each region during 1950-2015 were calculated.</li> <li>➤ India: National total population were taken from UN (2018). Regional ratios and proportion of urban population during 1951-2011 were estimated using data in Indiastat. Then, urban and rural population in each region were calculated.</li> <li>➤ Other countries: National urban and rural population during 1950-2015 were derived from UN (2018). For Taiwan, population data were taken from Worldometer (<a href="https://www.worldometers.info/">https://www.worldometers.info/</a>).</li> </ul> </li> </ul> |
| Asphalt blowing          | <ul style="list-style-type: none"> <li>● Activity data: Asphalt produced</li> <li>● Data sources and treatments: <ul style="list-style-type: none"> <li>➤ China: National total data in 2012 were taken from Wu et al. (2016) and extrapolated to 1950 using trends of Bitumen consumption in IEAWEB and GDP. Regional distribution was based on GDP.</li> <li>➤ Other countries and regions: National and regional data were taken</li> </ul> </li> </ul>                                                                                                                                                                                                                                                                                                                                                                                                                                                                                                                                                                                                                                                                                                 |

|                             |                                                                                                                                                                                                                                                                                                                                                                                                                                                                                                                                                                       |
|-----------------------------|-----------------------------------------------------------------------------------------------------------------------------------------------------------------------------------------------------------------------------------------------------------------------------------------------------------------------------------------------------------------------------------------------------------------------------------------------------------------------------------------------------------------------------------------------------------------------|
|                             | from default and extrapolated to 1950 using trends of Bitumen consumption in IEAWEB and GDP.                                                                                                                                                                                                                                                                                                                                                                                                                                                                          |
| Paint production            | <ul style="list-style-type: none"> <li>● Activity data: Paint produced</li> <li>● Data sources and treatments: <ul style="list-style-type: none"> <li>➤ China: National total data during 2011-2013 were taken from Zheng et al. (2017).</li> <li>➤ Other countries and regions: National data were taken from Industrial Commodity Statistical Yearbook.</li> <li>➤ All countries and regions: Extrapolation for missing data and regional distribution were based on GDP.</li> </ul> </li> </ul>                                                                    |
| Ink production              | <ul style="list-style-type: none"> <li>● Activity data: Ink produced</li> <li>● Data sources and treatments: <ul style="list-style-type: none"> <li>➤ China: National total data during 2011-2013 were taken from Zheng et al. (2017).</li> <li>➤ Other countries and regions: National data were taken from Industrial Commodity Statistical Yearbook.</li> <li>➤ All countries and regions: Extrapolation for missing data and regional distribution were based on GDP.</li> </ul> </li> </ul>                                                                      |
| Tire production             | <ul style="list-style-type: none"> <li>● Activity data: Tire produced</li> <li>● Data sources and treatments: <ul style="list-style-type: none"> <li>➤ China: National total data during 2011-2013 were taken from Zheng et al. (2017).</li> <li>➤ India: National data in 2010 were derived from Sharma et al. (2015).</li> <li>➤ Other countries: National data were taken from Industrial Commodity Statistical Yearbook.</li> <li>➤ All countries and regions: Extrapolation for missing data and regional distribution were based on GDP.</li> </ul> </li> </ul> |
| Synthetic rubber production | <ul style="list-style-type: none"> <li>● Activity data: Synthetic rubber produced</li> <li>● Data sources and treatments: <ul style="list-style-type: none"> <li>➤ China: National total data during 2011-2013 were taken from Zheng et al. (2017).</li> <li>➤ India: National data in 2010 were derived from Sharma et al. (2015).</li> <li>➤ Indonesia: National data in 2010 were obtained from Permadi et al. (2017).</li> <li>➤ Other countries: National data were taken from Industrial Commodity Statistical Yearbook.</li> </ul> </li> </ul>                 |

|                      |                                                                                                                                                                                                                                                                                                                                                                                                                                                                                                                                                                                                                                   |
|----------------------|-----------------------------------------------------------------------------------------------------------------------------------------------------------------------------------------------------------------------------------------------------------------------------------------------------------------------------------------------------------------------------------------------------------------------------------------------------------------------------------------------------------------------------------------------------------------------------------------------------------------------------------|
|                      | <ul style="list-style-type: none"> <li>➤ All countries and regions: Extrapolation for missing data and regional distribution were based on GDP.</li> </ul>                                                                                                                                                                                                                                                                                                                                                                                                                                                                        |
| Textile industry     | <ul style="list-style-type: none"> <li>● Activity data: Textile produced</li> <li>● Data sources and treatments: <ul style="list-style-type: none"> <li>➤ China: National total data during 2011-2013 were derived from Zheng et al. (2017).</li> <li>➤ Other countries and regions: National and regional data were taken from default.</li> <li>➤ All: Extrapolation for missing data and regional distribution for China were based on GDP.</li> </ul> </li> </ul>                                                                                                                                                             |
| Preservation of wood | <ul style="list-style-type: none"> <li>● Activity data: Wood treated</li> <li>● Data sources and treatments: <ul style="list-style-type: none"> <li>➤ All: National and regional data were taken from default and extrapolated during 1950-2015 using trends GDP.</li> </ul> </li> </ul>                                                                                                                                                                                                                                                                                                                                          |
| Adhesive application | <ul style="list-style-type: none"> <li>● Activity data: Adhesive consumed</li> <li>● Data sources and treatments: <ul style="list-style-type: none"> <li>➤ China: National total data in 2005 and 2010 were taken from Wei et al. (2008; 2011).</li> <li>➤ India: National data in 2010 were derived from Sharma et al. (2015).</li> <li>➤ Indonesia: National data in 2010 were obtained from Permadi et al. (2017).</li> <li>➤ Other countries: National data were taken from default.</li> <li>➤ All countries and regions: Extrapolation for missing data and regional distribution were based on GDP.</li> </ul> </li> </ul> |

### S5.1.3 Printing

In REASv3, NMVOC evaporative emissions from following four printing activities are considered: packing, offset printing, publication, and screen printing. Activity data are ink consumption for each purpose. In this sub-section, data sources and treatments of activity data used in REASv3 were described.

National total ink consumption data were calculated as default for this sub-section using production, export, and import amounts taken from Industrial Commodity Statistical Yearbook and missing data were extrapolated based on GDP. For China, national total ink consumption in 2005, 2010, and 2012 were derived from Wei et al. (2008, 2011) and Wu et al. (2016) and interpolated during 2005 and 2012. Before 2005 and after 2012, the data were extrapolated based on the default

data. For Indonesia, national total ink consumption data in 2010 were obtained from Permadi et al. (2017) and extrapolated during 1950-2015 based on the default data. For India, national ink consumption amounts in 2010 are available for packing, offset printing, publication, and screen printing in Sharma et al. (2015). The data were extrapolated during 1950-2015 based on the default data. For distribution of total ink consumption to each purpose except for India and regional distribution of national total data in China and India, activity data of REASv2 during 2000-2008 were used as weighting factors. Before 1999 and 2009, data in 2000 and 2008 were used respectively.

#### **S5.1.4 Paint application**

In REASv3, NMVOC evaporative emissions from paint application were considered for following purposes: architecture, domestic usage, automobile manufacture, vehicle refinishing, and other industrial applications. In this sub-section, data sources and treatments of activity data used in REASv3 were described.

National total paint consumption data during 2000-2009 were taken from a report of Information Research Limited and missing data were extrapolated during 1950-2015 based on GDP. For China, national total paint application data in 2005, 2010, and 2012 were derived from Wei et al. (2008, 2011) and Wu et al. (2016) and interpolated during 2005 and 2012. Before 2005 and after 2012, the data were extrapolated based on GDP. For India and Indonesia, national total paint consumption data in 2010 were obtained from Sharma et al. (2015) and Permadi et al. (2017), respectively and extrapolated during 1950-2015 based on GDP. The total paint consumption data were distributed to each purpose described above except for automobile manufacture using activity data of REASv2 during 2000-2008 as weighting factors. Before 1999 and after 2010, data in 2000 and 2008 were used respectively.

For automobile manufacture, activity data are production number of small and large vehicles. Production data of passenger vehicles (treated as small vehicles), bus and trucks (considered as large vehicles) in Asian countries during 2013-2015 were derived from the Japan Automobile Manufacture Association, Inc. (<http://www.jama-english.jp/>). Data of India and Republic of Korea were extrapolated to 1999 using data taken from Global Note (<https://www.globalnote.jp/>). Production number of passenger and duty vehicles were obtained from Michell (1998) and missing data were interpolated. For China, regional data during 1980-2015 were obtained from China Statistical Yearbook (National Bureau of Statistics of China, 1986–2016) and extrapolated to 1950 using national data in China Data Online.

### S5.1.5 Chemical industry

Activity data of NMVOC evaporative emissions from chemical industry were described in this sub-section. Data sources and treatments for each sub-sector category used in REASv3 were summarized in Table 5.3. (See Sect. S3.1 for energy consumption in chemical industry sub-sector and Sect. S4.1.7 for data sources of GDP used in this sub-section.)

**Table 5.3.** Data sources and treatments of activity data for sub-sectors of Chemical industry.

| Sub-sector categories   | Data sources and treatments of activity data                                                                                                                                                                                                                                                                                                                                                                                                                                                                                                                                                                                                                                                                                                                                                                                                                                                                                                                                                                                                                                                                                         |
|-------------------------|--------------------------------------------------------------------------------------------------------------------------------------------------------------------------------------------------------------------------------------------------------------------------------------------------------------------------------------------------------------------------------------------------------------------------------------------------------------------------------------------------------------------------------------------------------------------------------------------------------------------------------------------------------------------------------------------------------------------------------------------------------------------------------------------------------------------------------------------------------------------------------------------------------------------------------------------------------------------------------------------------------------------------------------------------------------------------------------------------------------------------------------|
| Ethylene production     | <ul style="list-style-type: none"> <li>● Activity data: Ethylene produced</li> <li>● Data sources and treatments: <ul style="list-style-type: none"> <li>➤ China: Regional data during 2004-2015 were extrapolated to 1978 using national data both obtained from China Statistical Yearbook (National Bureau of Statistics of China, 1986–2016). The data were extrapolated to 1950 based on total energy consumption in chemical industry sub-sector.</li> <li>➤ India: National data in 2010 were derived from Sharma et al. (2015) and Industrial Commodity Statistical Yearbook during 1983-2003. Data between 2003 and 2010 were interpolated and missing data were extrapolated based on total energy consumption in chemical industry sub-sector. For regional distribution, the default data were used as weighting factors.</li> <li>➤ Other countries and regions: National data before 1983 were taken from Industrial Commodity Statistical Yearbook and TOZAI BOEKI TSUSHINSHA (2014a). Missing data were interpolated and extrapolated based on total energy consumption in chemical industry.</li> </ul> </li> </ul> |
| Polyethylene production | <ul style="list-style-type: none"> <li>● Activity data: 'Polyethylene produced</li> <li>● Data sources and treatments: <ul style="list-style-type: none"> <li>➤ China: National data before 1985 were taken from Industrial Commodity Statistical Yearbook and TOZAI BOEKI TSUSHINSHA (2014b). For regional distribution, data of ethylene were used as weighting factors.</li> <li>➤ Other countries and regions: National data before 1983 were taken from Industrial Commodity Statistical Yearbook and TOZAI BOEKI TSUSHINSHA (2014a). For regional distribution in India, the default</li> </ul> </li> </ul>                                                                                                                                                                                                                                                                                                                                                                                                                                                                                                                    |

|                                                   |                                                                                                                                                                                                                                                                                                                                                                                                                                                                                                                                                                                                                                                                                                                                                                                                    |
|---------------------------------------------------|----------------------------------------------------------------------------------------------------------------------------------------------------------------------------------------------------------------------------------------------------------------------------------------------------------------------------------------------------------------------------------------------------------------------------------------------------------------------------------------------------------------------------------------------------------------------------------------------------------------------------------------------------------------------------------------------------------------------------------------------------------------------------------------------------|
|                                                   | data were used as weighting factors.                                                                                                                                                                                                                                                                                                                                                                                                                                                                                                                                                                                                                                                                                                                                                               |
| Styrene production                                | <ul style="list-style-type: none"> <li>● Activity data: Styrene produced</li> <li>● Data sources and treatments: <ul style="list-style-type: none"> <li>➤ National data during 2008-2013 in China and those during 2009-2015 were obtained from TOZAI BOEKI TSUSHINSHA (2014b; a). Extrapolation during 1950-2015 and regional distribution for China and India were conducted based on data of ethylene.</li> </ul> </li> </ul>                                                                                                                                                                                                                                                                                                                                                                   |
| Polystyrene production                            | <ul style="list-style-type: none"> <li>● Activity data: Polyethylene produced</li> <li>● Data sources and treatments: <ul style="list-style-type: none"> <li>➤ China: National data in 2010 were obtained from Wei et al. (2011). The data were extrapolated to 1950 and distributed to each region using data of ethylene.</li> <li>➤ India: National data in 2010 were derived from Sharma et al. (2015). The data were extrapolated to 1950 and distributed to each region using data of ethylene.</li> <li>➤ Other countries and regions: National data before 1983 were taken from Industrial Commodity Statistical Yearbook and TOZAI BOEKI TSUSHINSHA (2014a). Missing data were interpolated and extrapolated based on data of ethylene.</li> </ul> </li> </ul>                            |
| Polyvinylchloride production                      | <ul style="list-style-type: none"> <li>● Activity data: Polyvinylchloride produced</li> <li>● Data sources and treatments: <ul style="list-style-type: none"> <li>➤ China: National data during 2008-2013 were obtained from TOZAI BOEKI TSUSHINSHA (2014b). The data were extrapolated to 1950 and distributed to each region using data of ethylene.</li> <li>➤ India: National data in 2010 were derived from Sharma et al. (2015). The data were extrapolated to 1950 and distributed to each region using data of ethylene.</li> <li>➤ Other countries and regions: National data before 1983 were taken from Industrial Commodity Statistical Yearbook and TOZAI BOEKI TSUSHINSHA (2014a). Missing data were interpolated and extrapolated based on data of ethylene.</li> </ul> </li> </ul> |
| Propylene production/<br>Polypropylene production | <ul style="list-style-type: none"> <li>● Activity data: Propylene produced/Polypropylene produced</li> <li>● Data sources and treatments: <ul style="list-style-type: none"> <li>➤ China: National data during 2008-2013 were obtained from TOZAI BOEKI TSUSHINSHA (2014b) and extrapolated to 1950 using data of ethylene.</li> </ul> </li> </ul>                                                                                                                                                                                                                                                                                                                                                                                                                                                 |

|                              |                                                                                                                                                                                                                                                                                                                                                                              |
|------------------------------|------------------------------------------------------------------------------------------------------------------------------------------------------------------------------------------------------------------------------------------------------------------------------------------------------------------------------------------------------------------------------|
|                              | <ul style="list-style-type: none"> <li>➤ Other countries and regions: National data before 1983 were taken from Industrial Commodity Statistical Yearbook and TOZAI BOEKI TSUSHINSHA (2014a). Missing data were interpolated and extrapolated based on data of ethylene. Regional distribution for China and India were conducted also based on data of ethylene.</li> </ul> |
| Storage of organic chemicals | <ul style="list-style-type: none"> <li>● Activity data: Total production of organic chemicals</li> <li>● Data sources and treatments: See descriptions for organic chemicals in this table.</li> </ul>                                                                                                                                                                       |
| Polyvinylchloride processing | <ul style="list-style-type: none"> <li>● Activity data: Polyvinylchloride produced</li> <li>● Data sources and treatments: The same as for “Polyvinylchloride production”</li> </ul>                                                                                                                                                                                         |
| Polystyrene processing       | <ul style="list-style-type: none"> <li>● Activity data: Polyethylene produced</li> <li>● Data sources and treatments: The same as for “Polystyrene production”</li> </ul>                                                                                                                                                                                                    |
| Carbon black                 | <ul style="list-style-type: none"> <li>● Activity data: Carbon black produced</li> <li>● Data sources and treatments: See Sect. S4.1.7.</li> </ul>                                                                                                                                                                                                                           |

#### S5.1.6 Other industry

In this sub-section, activity data of NMVOC evaporative emissions from other industrial processes were described. Data sources and treatments for each sub-sector category used in REASv3 were summarized in Table 5.4. (See Sect. S4.1.7 for data sources of GDP used in this sub-section.)

**Table 5.4.** Data sources and treatments of activity data for sub-sectors of other industry.

| Sub-sector categories | Data sources and treatments of activity data                                                                                                                                                                                                                                                                                                                                                                                                                                                                                                                                                                                                                                                           |
|-----------------------|--------------------------------------------------------------------------------------------------------------------------------------------------------------------------------------------------------------------------------------------------------------------------------------------------------------------------------------------------------------------------------------------------------------------------------------------------------------------------------------------------------------------------------------------------------------------------------------------------------------------------------------------------------------------------------------------------------|
| Bread production      | <ul style="list-style-type: none"> <li>● Activity data: Bread produced</li> <li>● Data sources and treatments: <ul style="list-style-type: none"> <li>➤ China: National total data in 2012 were taken from Wu et al. (2016).</li> <li>➤ India: National data in 2010 were derived from Sharma et al. (2015).</li> <li>➤ Other countries: National data were taken from Industrial Commodity Statistical Yearbook.</li> <li>➤ All countries and regions: Extrapolation for missing data were based on population (see descriptions for domestic use of solvents in Sect. S5.1.2). For regional distribution of China and India, the default data were used as weighting factors.</li> </ul> </li> </ul> |
| Beer production       | <ul style="list-style-type: none"> <li>● Activity data: Beer produced</li> </ul>                                                                                                                                                                                                                                                                                                                                                                                                                                                                                                                                                                                                                       |

|                             |                                                                                                                                                                                                                                                                                                                                                                                                                                                                                                                                                                                                                                                                                  |
|-----------------------------|----------------------------------------------------------------------------------------------------------------------------------------------------------------------------------------------------------------------------------------------------------------------------------------------------------------------------------------------------------------------------------------------------------------------------------------------------------------------------------------------------------------------------------------------------------------------------------------------------------------------------------------------------------------------------------|
|                             | <ul style="list-style-type: none"> <li>● Data sources and treatments: <ul style="list-style-type: none"> <li>➤ China: Regional data during 1983-2015 were obtained from China Statistical Yearbook (National Bureau of Statistics of China, 1986–2016) and extrapolated to 1950 using Mitchell (1998).</li> <li>➤ Other countries: National data after 2006 were taken from Brewers Association of Japan (<a href="http://www.brewers.or.jp/english/index.html">http://www.brewers.or.jp/english/index.html</a>) and before 1993 were obtained from Mitchell (1998). For regional distribution of India, the default data were used as weighting factors.</li> </ul> </li> </ul> |
| Coke production             | <ul style="list-style-type: none"> <li>● Activity data: Coke produced</li> <li>● Data sources and treatments: See Sect. S4.1.8.</li> </ul>                                                                                                                                                                                                                                                                                                                                                                                                                                                                                                                                       |
| Asphalt production          | <ul style="list-style-type: none"> <li>● Activity data: Asphalt produced</li> <li>● Data sources and treatments: See Sect. S5.1.2 (Asphalt blowing).</li> </ul>                                                                                                                                                                                                                                                                                                                                                                                                                                                                                                                  |
| Crude steel production      | <ul style="list-style-type: none"> <li>● Activity data: Crude steel produced</li> <li>● Data sources and treatments: See Sect. S4.1.1.</li> </ul>                                                                                                                                                                                                                                                                                                                                                                                                                                                                                                                                |
| Hot rolled steel production | <ul style="list-style-type: none"> <li>● Activity data: Hot rolled steel produced</li> <li>● Data sources and treatments: See Sect. S4.1.1.</li> </ul>                                                                                                                                                                                                                                                                                                                                                                                                                                                                                                                           |
| Pulp and paper production   | <ul style="list-style-type: none"> <li>● Activity data: Paper pulp produced</li> <li>● Data sources and treatments: <ul style="list-style-type: none"> <li>➤ China: Regional data during 1983-2015 were obtained from China Statistical Yearbook (National Bureau of Statistics of China, 1986–2016) and extrapolated to 1950 using China Data Online.</li> <li>➤ Other countries: National data were taken from FAOSTAT (<a href="http://www.fao.org/faostat/en/">http://www.fao.org/faostat/en/</a>). For regional distribution of India, the default data were used as weighting factors.</li> </ul> </li> </ul>                                                              |

### S5.1.7 Waste disposal

In REASv3, evaporative NMVOC emissions from disposal of municipal wastes were considered and those of industrial wastes were not included due to lack of information. Activity data are amounts of municipal wastes. Data sources and treatments of activity data used in REASv3 were summarized in Table 5.5. (See Sect. S5.1.2 (Domestic use of solvents) for data sources of population used in this sub-section.)

**Table 5.5.** Data sources and treatments of activity data for waste disposal.

| Countries and regions | Data sources and treatments of activity data                                                                                                                                                                                                                                   |
|-----------------------|--------------------------------------------------------------------------------------------------------------------------------------------------------------------------------------------------------------------------------------------------------------------------------|
| China                 | Regional amounts of municipal wastes after 2003 were derived from China Statistical Yearbook (National Bureau of Statistics of China, 1986–2016) and extrapolated to 1950 using number of population.                                                                          |
| India                 | National total data in 2000, 2005, 2010, and 2015 were taken from Niyati (2015) and those in 2012 were obtained from UN Environment Programme (2017). The data were interpolated, extrapolated during 1950–2015, and distributed to each region based on number of population. |
| Rep. of Korea         | National data during 1994–2004 were taken from Shragge and An (2014) and those in 2012 were obtained from UN Environment Programme (2017). The data were interpolated and extrapolated during 1950–2015 based on number of population.                                         |
| Taiwan                | National data during 2003–2015 were taken from Environmental Protection Administration ( <a href="https://www.epa.gov.tw/eng/2C04F91E41A2000B/">https://www.epa.gov.tw/eng/2C04F91E41A2000B/</a> ) and extrapolated during 1950–2015 using number of population                |
| Thailand              | National data during 1993–2002 were taken from Chiemchaisri et al., (2007) and extrapolated during 1950–2015 using number of population                                                                                                                                        |
| Other countries       | National data were obtained from UN Environment Programme (2017) and missing data were extrapolated during 1950–2015 based on number of population.                                                                                                                            |

## S5.2 Emission factors

In this section, emission factors for non-combustion sources of NMVOC for each sub-category are described. Note that emission controls were not considered for non-combustion emissions of NMVOC in REASv3.

### S5.2.1 Extraction processes

Emission factors for following sub-sectors were taken from Klimont et al. (2002a) and the same settings were used for all countries and regions as well as for all target years of REASv3:

- Gas production
- Gas distribution
- Oil production

- Oil handling
- Petroleum refinery
- Service stations
- Transport and depots (gasoline/diesel)

### S5.2.2 Solvent use

In this sub-section, emission factors for solvent use except for printing and paint use are described. Sources and settings of emission factors are summarized in Table 5.6.

**Table 5.6.** Sources and settings of emission factors for sub-sectors of solvent use.

| Sub-sector categories    | Sources and settings of emission factors                                                                                                                                                                                                                                                                                                                                                                                                                                                                                                                                                   |
|--------------------------|--------------------------------------------------------------------------------------------------------------------------------------------------------------------------------------------------------------------------------------------------------------------------------------------------------------------------------------------------------------------------------------------------------------------------------------------------------------------------------------------------------------------------------------------------------------------------------------------|
| Dry cleaning             | <ul style="list-style-type: none"> <li>● Sources: Data for existing and new installations in Klimont et al. (2002a)</li> <li>● Settings: The value for existing installations was commonly used for all target countries and periods except for Rep. of Korea and Taiwan where the same value was used before 2000. For Rep of Korea and Taiwan, it was assumed that all installations in 2020 are new and ratios of existing and new installations were changed linearly between 2000 and 2020. Based on the assumption emission factors during 2001 and 2015 were calculated.</li> </ul> |
| Degreasing operation     | <ul style="list-style-type: none"> <li>● Sources and settings are the same as those “Dry cleaning”.</li> </ul>                                                                                                                                                                                                                                                                                                                                                                                                                                                                             |
| Vehicle treatment        | <ul style="list-style-type: none"> <li>● Sources: Default data and settings until 2030 in Klimont et al. (2002a)</li> <li>● Settings: The Default value was used before 2000. After 2001, data in 2000 and those assumed in 2030 in Klimont et al. (2002a) were interpolated. These settings are commonly adopted for all countries.</li> </ul>                                                                                                                                                                                                                                            |
| Domestic use of solvents | <ul style="list-style-type: none"> <li>● Sources: Default emission factors and settings until 2030 for rural and urban population in Klimont et al. (2002a)</li> <li>● Settings: Emission factors for rural and urban population were estimated by the same methodology for “Vehicle treatment” and adopted for all countries.</li> </ul>                                                                                                                                                                                                                                                  |
| Asphalt blowing          | <ul style="list-style-type: none"> <li>● Sources: Klimont et al. (2002a)</li> <li>● Settings: The value was used for all target countries and periods.</li> </ul>                                                                                                                                                                                                                                                                                                                                                                                                                          |
| Paint production         | <ul style="list-style-type: none"> <li>● Sources: Klimont et al. (2002a)</li> <li>● Settings: The value was used for all target countries and periods.</li> </ul>                                                                                                                                                                                                                                                                                                                                                                                                                          |

|                             |                                                                                                                                                                   |
|-----------------------------|-------------------------------------------------------------------------------------------------------------------------------------------------------------------|
| Ink production              | <ul style="list-style-type: none"> <li>● Sources: Klimont et al. (2002a)</li> <li>● Settings: The value was used for all target countries and periods.</li> </ul> |
| Tire production             | <ul style="list-style-type: none"> <li>● Sources: Klimont et al. (2002a)</li> <li>● Settings: The value was used for all target countries and periods.</li> </ul> |
| Synthetic rubber production | <ul style="list-style-type: none"> <li>● Sources: Klimont et al. (2002a)</li> <li>● Settings: The value was used for all target countries and periods.</li> </ul> |
| Textile industry            | <ul style="list-style-type: none"> <li>● Sources: Klimont et al. (2002a)</li> <li>● Settings: The value was used for all target countries and periods.</li> </ul> |
| Preservation of wood        | <ul style="list-style-type: none"> <li>● Sources and settings are the same as those “Dry cleaning”.</li> </ul>                                                    |
| Adhesive application        | <ul style="list-style-type: none"> <li>● Sources: EEA (2016)</li> <li>● Settings: The value was used for all target countries and periods.</li> </ul>             |

### S5.2.3 Printing

Klimont et al. (2002a) provides emission factors of packaging, offset printing, publication, and screen printing for existing and new installations. The same assumption for sub-sectors such as dry cleaning described in Sect. S5.2.2 was used in RESv3.1. as follows:

- The values for existing installations were commonly used for all target countries and periods except for Rep. of Korea and Taiwan where the same value was used before 2000.
- For Rep of Korea and Taiwan, it was assumed that all installations in 2020 are new and ratios of existing and new installations were changed linearly between 2000 and 2020. Based on the assumption emission factors during 2001 and 2015 were calculated.

### S5.2.4 Paint use

In this sub-section, emission factors for paint use for architecture, domestic usage, automobile manufacture, vehicle refinishing, and other industrial applications are described. Sources and settings of emission factors are summarized in Table 5.7.

**Table 5.7.** Sources and settings of emission factors for sub-sectors of paint use.

| Sub-sector categories | Sources and settings of emission factors                                                                                                                          |
|-----------------------|-------------------------------------------------------------------------------------------------------------------------------------------------------------------|
| Architecture          | <ul style="list-style-type: none"> <li>● Sources: Klimont et al. (2002a)</li> <li>● Settings: The value was used for all target countries and periods.</li> </ul> |
| Domestic use          | <ul style="list-style-type: none"> <li>● Sources: Klimont et al. (2002a)</li> </ul>                                                                               |

|                              |                                                                                                                                                                                                                                                                                                                                                                                                                                                                                                                                                                                            |
|------------------------------|--------------------------------------------------------------------------------------------------------------------------------------------------------------------------------------------------------------------------------------------------------------------------------------------------------------------------------------------------------------------------------------------------------------------------------------------------------------------------------------------------------------------------------------------------------------------------------------------|
|                              | <ul style="list-style-type: none"> <li>● Settings: The value was used for all target countries and periods.</li> </ul>                                                                                                                                                                                                                                                                                                                                                                                                                                                                     |
| Vehicle refinishing          | <ul style="list-style-type: none"> <li>● Sources: Data for existing and new installations in Klimont et al. (2002a)</li> <li>● Settings: The value for existing installations was commonly used for all target countries and periods except for Rep. of Korea and Taiwan where the same value was used before 2000. For Rep of Korea and Taiwan, it was assumed that all installations in 2020 are new and ratios of existing and new installations were changed linearly between 2000 and 2020. Based on the assumption emission factors during 2001 and 2015 were calculated.</li> </ul> |
| Automobile manufacturing     | <ul style="list-style-type: none"> <li>● Sources: Range of emission factors depending on the proportion of vehicle types in Klimont et al. (2002a)</li> <li>● Settings: The lowest and highest values of the range were used for small and large vehicles, respectively. See Sect. S5.1.4 for the definitions of vehicle sizes here.</li> </ul>                                                                                                                                                                                                                                            |
| Other industrial application | <ul style="list-style-type: none"> <li>● Sources: Klimont et al. (2002a)</li> <li>● Settings: The value was used for all target countries and periods.</li> </ul>                                                                                                                                                                                                                                                                                                                                                                                                                          |

### S5.2.5 Chemical industry

In this sub-section, emission factors for chemical industry are described. Sources and settings of emission factors are summarized in Table 5.8.

**Table 5.8.** Sources and settings of emission factors for sub-sectors of chemical industry.

| Sub-sector categories        | Sources and settings of emission factors                                                                                                                                                                                              |
|------------------------------|---------------------------------------------------------------------------------------------------------------------------------------------------------------------------------------------------------------------------------------|
| Ethylene production          | <ul style="list-style-type: none"> <li>● Sources: Klimont et al. (2002a)</li> <li>● Settings: The value was used for all target countries and periods.</li> </ul>                                                                     |
| Polyethylene production      | <ul style="list-style-type: none"> <li>● Sources: Klimont et al. (2002a)</li> <li>● Settings: Average of emission factors for low and high-density polyethylene production were used for all target countries and periods.</li> </ul> |
| Styrene production           | <ul style="list-style-type: none"> <li>● Sources: EEA (2016)</li> <li>● Settings: The value was used for all target countries and periods.</li> </ul>                                                                                 |
| Polystyrene production       | <ul style="list-style-type: none"> <li>● Sources: EEA (2016)</li> <li>● Settings: The value was used for all target countries and periods.</li> </ul>                                                                                 |
| Polyvinylchloride production | <ul style="list-style-type: none"> <li>● Sources: Klimont et al. (2002a)</li> <li>● Settings: The value was used for all target countries and periods.</li> </ul>                                                                     |

|                              |                                                                                                                                                                                                                                                                  |
|------------------------------|------------------------------------------------------------------------------------------------------------------------------------------------------------------------------------------------------------------------------------------------------------------|
| Propylene production         | <ul style="list-style-type: none"> <li>● Sources: Klimont et al. (2002a)</li> <li>● Settings: The value was used for all target countries and periods.</li> </ul>                                                                                                |
| Polypropylene production     | <ul style="list-style-type: none"> <li>● Sources: Klimont et al. (2002a)</li> <li>● Settings: The value was used for all target countries and periods.</li> </ul>                                                                                                |
| Storage of organic chemicals | <ul style="list-style-type: none"> <li>● Sources: Klimont et al. (2002a)</li> <li>● Settings: Emission factors of EEA (2016) include contribution from the storage. In REASv3, 10 percent of the value was used for all target countries and periods.</li> </ul> |
| Polyvinylchloride processing | <ul style="list-style-type: none"> <li>● Sources: Klimont et al. (2002a)</li> <li>● Settings: The value was used for all target countries and periods.</li> </ul>                                                                                                |
| Polystyrene processing       | <ul style="list-style-type: none"> <li>● Sources: EEA (2016)</li> <li>● Settings: The value was used for all target countries and periods.</li> </ul>                                                                                                            |
| Carbon black                 | <ul style="list-style-type: none"> <li>● Sources: Klimont et al. (2002a)</li> <li>● Settings: The value was used for all target countries and periods.</li> </ul>                                                                                                |

#### S5.2.6 Other industry

In this sub-section, emission factors for non-combustion emissions from other industry are described. Sources and settings of emission factors are summarized in Table 5.9.

**Table 5.9.** Sources and settings of emission factors for sub-sectors of other industry.

| Sub-sector categories       | Data sources and treatments of activity data                                                                                                                                           |
|-----------------------------|----------------------------------------------------------------------------------------------------------------------------------------------------------------------------------------|
| Bread production            | <ul style="list-style-type: none"> <li>● Sources: Klimont et al. (2002a)</li> <li>● Settings: The value was used for all target countries and periods.</li> </ul>                      |
| Beer production             | <ul style="list-style-type: none"> <li>● Sources: Klimont et al. (2002a)</li> <li>● Settings: The value was used for all target countries and periods.</li> </ul>                      |
| Coke production             | <ul style="list-style-type: none"> <li>● Sources: Klimont et al. (2002a)</li> <li>● Settings: The value was used for all target countries and periods.</li> </ul>                      |
| Asphalt production          | <ul style="list-style-type: none"> <li>● Sources: Klimont et al. (2002a)</li> <li>● Settings: The value was used for all target countries and periods.</li> </ul>                      |
| Crude steel production      | <ul style="list-style-type: none"> <li>● Sources: Klimont et al. (2002a)</li> <li>● Settings: The value for steel production was used for all target countries and periods.</li> </ul> |
| Hot rolled steel production | <ul style="list-style-type: none"> <li>● Sources: Klimont et al. (2002a)</li> <li>● Settings: The value for rolling mills was used for all target countries and</li> </ul>             |

|                           |                                                                                                                                                                   |
|---------------------------|-------------------------------------------------------------------------------------------------------------------------------------------------------------------|
|                           | periods.                                                                                                                                                          |
| Pulp and paper production | <ul style="list-style-type: none"> <li>● Sources: Klimont et al. (2002a)</li> <li>● Settings: The value was used for all target countries and periods.</li> </ul> |

### S5.2.7 Waste disposal

In REASv3, the emission factor for landfills for waste disposal in Klimont et al. (2002a) were adopted for all activity data (amounts of municipal wastes) described in S5.1.7.

### S5.2.8 Speciation of NMVOC emissions

Emission factors described in Sect. S5.2 were for total NMVOC. In REASv3, total NMVOC emissions were allocated to 19 NMVOC species categories defined in Sect. S2.1. The speciation was conducted based on speciation profiles for each sub-sector provided by D. G. Streets (private communication) generally based on Klimont et al. (2002a) used for REASv1 and REASv2. The speciation profiles were commonly used for all countries and periods.

## S5.3 Other emission inventories included in REASv3

### S5.3.1 Japan

In REASv3, evaporative emissions of individual NMVOC species from sub-sectors in Japan during 2000-2015 were obtained from the Ministry of the Environment of Japan (MOEJ, 2017a). Information for regional distribution was also available in MOEJ (2017a). Emissions of the individual species were aggregated to 19 NMVOC species categories defined in Sect S2.1. Before 1999, data in 2000 were extrapolated based on trend factors related to each sub-sector as described in Table 5.10.

**Table 5.10.** Sources and treatments of trend factors for sub-sectors of NMVOC evaporative emissions in Japan

| Sub-sector categories  | Data sources and treatments of trend factors                                                                                                                                                                                                                                                                |
|------------------------|-------------------------------------------------------------------------------------------------------------------------------------------------------------------------------------------------------------------------------------------------------------------------------------------------------------|
| Natural gas production | <ul style="list-style-type: none"> <li>● Trend factors: Natural gas production</li> <li>● Data sources and treatments: Data during 1960-2000 were derived from IEAWEB and extrapolated to 1950 using trends taken from the Historical Statistics of Japan (Japan Statistical Association, 2006).</li> </ul> |

|                              |                                                                                                                                                                                                                                                                                                                                                                                                                                                                                                                                                                           |
|------------------------------|---------------------------------------------------------------------------------------------------------------------------------------------------------------------------------------------------------------------------------------------------------------------------------------------------------------------------------------------------------------------------------------------------------------------------------------------------------------------------------------------------------------------------------------------------------------------------|
| Coke production              | <ul style="list-style-type: none"> <li>● Trend factors: Coke produced</li> <li>● Data sources and treatments: See Sect. S4.1.8.</li> </ul>                                                                                                                                                                                                                                                                                                                                                                                                                                |
| Petroleum refinery           | <ul style="list-style-type: none"> <li>● Trend factors: Consumption of crude oil in petroleum refineries</li> <li>● Data sources and treatments: See Sect. S3.1.</li> </ul>                                                                                                                                                                                                                                                                                                                                                                                               |
| Service stations             | <ul style="list-style-type: none"> <li>● Trend factors: Consumption of gasoline in road transport sector</li> <li>● Data sources and treatments: See Sect. S3.1.</li> </ul>                                                                                                                                                                                                                                                                                                                                                                                               |
| Transport and depots         | <ul style="list-style-type: none"> <li>● Trend factors: Consumption of gasoline and diesel in road transport sector</li> <li>● Data sources and treatments: See Sect. S3.1.</li> </ul>                                                                                                                                                                                                                                                                                                                                                                                    |
| Dry cleaning                 | <ul style="list-style-type: none"> <li>● Trend factors: Number of facilities</li> <li>● Data sources and treatments: Data during 1963-2000 were taken from Japan Cleaning Journal (<a href="http://www.nicli.co.jp/stat-sisetu.html">http://www.nicli.co.jp/stat-sisetu.html</a>) and extrapolated to 1950 using values of shipments for industrial organic chemicals obtained from the Historical Statistics of Japan (Japan Statistical Association, 2006) were used as trend factors.</li> </ul>                                                                       |
| Detergents usage in industry | <ul style="list-style-type: none"> <li>● Trend factors: Values of shipments of detergents for industries</li> <li>● Data sources and treatments: Data during 1960-2000 were obtained from Yearbook of Chemical Industry Statistics (Ministry of Economy, Trade and Industry, Japan, <a href="https://www.meti.go.jp/statistics/">https://www.meti.go.jp/statistics/</a>). Before 1960, values of shipments for industrial organic chemicals obtained from the Historical Statistics of Japan (Japan Statistical Association, 2006) were used as trend factors.</li> </ul> |
| Adhesive application         | <ul style="list-style-type: none"> <li>● Trend factors: Adhesive produced</li> <li>● Data sources and treatments: Data during 1960-2000 were obtained from Yearbook of Chemical Industry Statistics (Ministry of Economy, Trade and Industry, Japan, <a href="https://www.meti.go.jp/statistics/">https://www.meti.go.jp/statistics/</a>). Before 1960, values of shipments of industrial organic chemicals obtained from the Historical Statistics of Japan (Japan Statistical Association, 2006) were used as trend factors.</li> </ul>                                 |
| Asphalt blowing              | <ul style="list-style-type: none"> <li>● Trend factors: Asphalt produced</li> <li>● Data sources and treatments: Data during 1950-2000 were derived from the Historical Statistics of Japan (Japan Statistical Association, 2006).</li> </ul>                                                                                                                                                                                                                                                                                                                             |
| Rubber production            | <ul style="list-style-type: none"> <li>● Trend factors: Rubber produced</li> <li>● Data sources and treatments: Production amounts and values of shipments for rubber products were taken from the Historical Statistics of Japan (Japan Statistical Association, 2006).</li> </ul>                                                                                                                                                                                                                                                                                       |

|                              |                                                                                                                                                                                                                                                                                                                                                                                                                                                                                                                                                                   |
|------------------------------|-------------------------------------------------------------------------------------------------------------------------------------------------------------------------------------------------------------------------------------------------------------------------------------------------------------------------------------------------------------------------------------------------------------------------------------------------------------------------------------------------------------------------------------------------------------------|
| Synthetic leather production | <ul style="list-style-type: none"> <li>● Trend factors: Synthetic leather produced</li> <li>● Data sources and treatments: Data during 1985-2000 and those for all leather products before 1984 were obtained from the Historical Statistics of Japan (Japan Statistical Association, 2006).</li> </ul>                                                                                                                                                                                                                                                           |
| Protection of fishing net    | <ul style="list-style-type: none"> <li>● Trend factors: Fishing net produced</li> <li>● Data sources and treatments: Data were obtained from Yearbook of Current Production Statistics (Ministry of Economy, Trade and Industry, Japan, <a href="https://www.meti.go.jp/statistics/">https://www.meti.go.jp/statistics/</a>) and the Historical Statistics of Japan (Japan Statistical Association, 2006).</li> </ul>                                                                                                                                             |
| Ink application              | <ul style="list-style-type: none"> <li>● Trend factors: Values of shipments by publishing, printing and allied industries</li> <li>● Data sources and treatments: Data were obtained from Yearbook of Chemical Industry Statistics (Ministry of Economy, Trade and Industry, Japan, <a href="https://www.meti.go.jp/statistics/">https://www.meti.go.jp/statistics/</a>) and the Historical Statistics of Japan (Japan Statistical Association, 2006).</li> </ul>                                                                                                 |
| Paint application            | <ul style="list-style-type: none"> <li>● Trend factors: Values of shipments by paint industries of manufacturing</li> <li>● Data sources and treatments: Data during 1960-2000 were obtained from Yearbook of Chemical Industry Statistics (Ministry of Economy, Trade and Industry, Japan, <a href="https://www.meti.go.jp/statistics/">https://www.meti.go.jp/statistics/</a>). Before 1960, production of synthetic paints obtained from the Historical Statistics of Japan (Japan Statistical Association, 2006) were used.</li> </ul>                        |
| Other solvent use            | <ul style="list-style-type: none"> <li>● Trend factors: Values of shipments of industrial organic chemicals</li> <li>● Data sources and treatments: Data during 1950-2000 were obtained from the Historical Statistics of Japan (Japan Statistical Association, 2006)</li> </ul>                                                                                                                                                                                                                                                                                  |
| Chemical industry            | <ul style="list-style-type: none"> <li>● Trend factors: Petrochemicals produced</li> <li>● Data sources and treatments: Data during 1960-2000 were obtained from Yearbook of Chemical Industry Statistics (Ministry of Economy, Trade and Industry, Japan, <a href="https://www.meti.go.jp/statistics/">https://www.meti.go.jp/statistics/</a>) were extrapolated to 1950 using values of shipments of industrial organic chemicals obtained from the Historical Statistics of Japan (Japan Statistical Association, 2006) were used as trend factors.</li> </ul> |
| Food production              | <ul style="list-style-type: none"> <li>● Trend factors: Values of shipments by food industries of manufacturing</li> <li>● Data sources and treatments: Data during 1950-2000 were obtained from the Historical Statistics of Japan (Japan Statistical Association, 2006).</li> </ul>                                                                                                                                                                                                                                                                             |
| Pesticide application        | <ul style="list-style-type: none"> <li>● Trend factors: Pesticide produced</li> <li>● Data sources and treatments: Data during 1950-2000 were taken from</li> </ul>                                                                                                                                                                                                                                                                                                                                                                                               |

|        |                                                                                                                                   |
|--------|-----------------------------------------------------------------------------------------------------------------------------------|
|        | Japan Crop Production Association<br>( <a href="https://www.jcpa.or.jp/qa/a5_12.html">https://www.jcpa.or.jp/qa/a5_12.html</a> ). |
| Others | <ul style="list-style-type: none"> <li>● Trend factors: GDP</li> <li>● Data sources and treatments: See Sect. S4.1.7</li> </ul>   |

### S5.3.2 Republic of Korea

For Republic of Korea, first, NMVOC (including 19 individual species) emissions from evaporative sources were tentatively estimated using activity data and emission factors described in Sects. S5.1 and S5.2, respectively. Then, emissions from extraction processes, solvent use including printing and paint application, and industrial processes in both chemical and other industries, and waste disposal were obtained from the National Institute of Environmental Research (<http://airemiss.nier.go.kr/mbs/home/mbs/airemiss/index.do>) during 1999-2015. Finally, the tentatively estimated emissions for each sub-sector were adjusted by ratios between the aggregated emissions of the National Institute of Environmental Research and those of the tentative estimation. For example, tentative emissions from dry cleaning were adjusted by factors calculated for solvent use. Before 1999, the tentative emissions were adjusted using the factors for the year 1999. Note that emissions from combustion sources for Republic of Korea were originally estimated in REASv3.

## **S6. Road transport**

### **S6.1 Activity data**

#### **S6.1.1 Annual mileage**

In REASv3, exhaust emissions from road vehicles were estimated based on annual distances vehicles are driven (annual mileage) and corresponding emission factors (amounts of air pollutants per distance driven). The annual mileages were calculated by number of vehicles and annual distances traveled for each vehicle type. The number of vehicles was obtained from national and international statistics and related literatures. However, available vehicle categories in the data are different among countries and regions. In addition, information for categories of different fuel types such as gasoline and diesel and annual distances traveled for each vehicle type is limited. In Table 6.1, data sources and assumptions to estimate historical annual mileage data are provided.

**Table 6.1.** Data sources and settings of number of vehicles and annual distance travelled for each country and region in REASv3.

**(a) China**

|                           |                                                                                                                                                                                                                                                                                                                                                                                                                                                                                                                                                                                                                                                                                                                                                                                                                                                                                                                                                                                                                                                                                                                                                                                                    |
|---------------------------|----------------------------------------------------------------------------------------------------------------------------------------------------------------------------------------------------------------------------------------------------------------------------------------------------------------------------------------------------------------------------------------------------------------------------------------------------------------------------------------------------------------------------------------------------------------------------------------------------------------------------------------------------------------------------------------------------------------------------------------------------------------------------------------------------------------------------------------------------------------------------------------------------------------------------------------------------------------------------------------------------------------------------------------------------------------------------------------------------------------------------------------------------------------------------------------------------|
| Number of vehicles        | <ul style="list-style-type: none"><li>● Data sources:<ul style="list-style-type: none"><li>➤ Regional data of large/medium/small/mini passenger vehicles and heavy/medium/light/mini trucks during 1985-2015 were taken from China Statistical Yearbook and extrapolated to 1950 using number of civil motor vehicles in each region in China Data Online.</li><li>➤ For motorcycles, national total during 1991-2015 were taken from IRF (1990-2018) and distributed to each region and extrapolated to 1950 using the number of civil motor vehicles in each region.</li></ul></li><li>● Vehicle categories:<ul style="list-style-type: none"><li>➤ For data based on China Statistical Yearbook, large/medium and small/minicar passenger vehicles were treated as buses and cars, respectively. For trucks, heavy/medium and light/mini vehicles were treated as heavy and light trucks, respectively. For distribution of fuel types, data in He et al. (2005) were used for cars and those in Yan and Crookes (2009) were used for buses and trucks.</li><li>➤ No classification was done for motorcycles and it was assumed that only gasoline was used in motorcycles.</li></ul></li></ul> |
| Annual distance travelled | <ul style="list-style-type: none"><li>● Settings of annual distance travelled for each vehicle type were based on Huo et al. (2012b).</li></ul>                                                                                                                                                                                                                                                                                                                                                                                                                                                                                                                                                                                                                                                                                                                                                                                                                                                                                                                                                                                                                                                    |

**(b) Hong Kong**

|                    |                                                                                                                                                                                                                                                                                                                                                                                                                                                                                                                                                                                                                                                                                                                                                                                                                                                                                                                                            |
|--------------------|--------------------------------------------------------------------------------------------------------------------------------------------------------------------------------------------------------------------------------------------------------------------------------------------------------------------------------------------------------------------------------------------------------------------------------------------------------------------------------------------------------------------------------------------------------------------------------------------------------------------------------------------------------------------------------------------------------------------------------------------------------------------------------------------------------------------------------------------------------------------------------------------------------------------------------------------|
| Number of vehicles | <ul style="list-style-type: none"><li>● Data sources:<ul style="list-style-type: none"><li>➤ Data of passenger cars, buses, trucks, and motorcycles during 1964-2015 were obtained from IRF (1976-2018) and extrapolated to 1950 using trends of number of vehicles for aggregated vehicle types in Mitchell (1998).</li></ul></li><li>● Vehicle categories:<ul style="list-style-type: none"><li>➤ Vehicle types include gasoline, diesel, and LPG passenger cars, taxis, buses, and light and heavy trucks, and motorcycles. For relative ratios of vehicles numbers of each fuel type, in addition to data of Streets et al. (2003) and REASv2 generally based on GAINS ASIA at that time, data in A clean air plan for Hong Kong (Environment Bureau, 2013) and consumption amounts of LPG in road transport sector in the International Energy Agency (IEA) World Energy Balances (IEAWEB) (IEA, 2017) were used.</li></ul></li></ul> |
|--------------------|--------------------------------------------------------------------------------------------------------------------------------------------------------------------------------------------------------------------------------------------------------------------------------------------------------------------------------------------------------------------------------------------------------------------------------------------------------------------------------------------------------------------------------------------------------------------------------------------------------------------------------------------------------------------------------------------------------------------------------------------------------------------------------------------------------------------------------------------------------------------------------------------------------------------------------------------|

|                           |                                                                                                |
|---------------------------|------------------------------------------------------------------------------------------------|
| Annual distance travelled | <ul style="list-style-type: none"> <li>● Settings of Singapore were used in REASv3.</li> </ul> |
|---------------------------|------------------------------------------------------------------------------------------------|

### (c) Macau

|                           |                                                                                                                                                                                                                                                                                                                                                                                                                                                                                                                                                                                                                                                                                                           |
|---------------------------|-----------------------------------------------------------------------------------------------------------------------------------------------------------------------------------------------------------------------------------------------------------------------------------------------------------------------------------------------------------------------------------------------------------------------------------------------------------------------------------------------------------------------------------------------------------------------------------------------------------------------------------------------------------------------------------------------------------|
| Number of vehicles        | <ul style="list-style-type: none"> <li>● Data sources: <ul style="list-style-type: none"> <li>➤ Data of passenger cars, buses, trucks, and motorcycles during 1994-2015 were obtained from IRF (1976-2018) and extrapolated to 1950 using trends of fuel consumption in the United Nations (UN) Energy Statistics Database (UN, 2016).</li> </ul> </li> <li>● Vehicle categories: <ul style="list-style-type: none"> <li>➤ Vehicle types include gasoline and diesel passenger cars, buses, light and heavy trucks, and motorcycles. For relative ratios of gasoline and diesel vehicle numbers, data of Hong Kong in REASv2 generally based on GAINS ASIA at that time were used.</li> </ul> </li> </ul> |
| Annual distance travelled | <ul style="list-style-type: none"> <li>● Settings of Singapore were used in REASv3.</li> </ul>                                                                                                                                                                                                                                                                                                                                                                                                                                                                                                                                                                                                            |

### (d) India

|                    |                                                                                                                                                                                                                                                                                                                                                                                                                                                                                                                                                                                                                                                                                                                                                                                                                                                                                                                                                                                                                                                                                                                                                                                                                                  |
|--------------------|----------------------------------------------------------------------------------------------------------------------------------------------------------------------------------------------------------------------------------------------------------------------------------------------------------------------------------------------------------------------------------------------------------------------------------------------------------------------------------------------------------------------------------------------------------------------------------------------------------------------------------------------------------------------------------------------------------------------------------------------------------------------------------------------------------------------------------------------------------------------------------------------------------------------------------------------------------------------------------------------------------------------------------------------------------------------------------------------------------------------------------------------------------------------------------------------------------------------------------|
| Number of vehicles | <ul style="list-style-type: none"> <li>● Data sources: <ul style="list-style-type: none"> <li>➤ Regional data of passenger cars, taxis, jeeps, buses, light trucks, heavy trucks, trailers, light motor vehicles, and motorcycles during 2001-2015 were taken from TERI (2013, 2018) and extrapolated to 1950 using trends of national data for cars &amp; jeeps &amp; taxis, buses, trucks, and motorcycles obtained from Indiastat.</li> </ul> </li> <li>● Vehicle categories: <ul style="list-style-type: none"> <li>➤ In general, passenger cars, taxis, jeeps, light motor vehicles, and motorcycles assumed to consume gasoline and for buses, trucks, and trailers, the fuel type is assumed to be diesel. For Delhi and Mumbai (in Maharashtra), number of CNG cars, taxis, and buses in 2010 were assumed based on Sahu et al. (2014) and extrapolated using IEAWEB.</li> <li>➤ According to Baidya and Borken-Kleefeld (2009), there are large differences between registered number of vehicles and those actually circulating on the road. Relative ratios of vehicle numbers in operation to registered ones were taken from Prakash and Habib (2018) and Baidya and Borken-Kleefeld (2009).</li> </ul> </li> </ul> |
|--------------------|----------------------------------------------------------------------------------------------------------------------------------------------------------------------------------------------------------------------------------------------------------------------------------------------------------------------------------------------------------------------------------------------------------------------------------------------------------------------------------------------------------------------------------------------------------------------------------------------------------------------------------------------------------------------------------------------------------------------------------------------------------------------------------------------------------------------------------------------------------------------------------------------------------------------------------------------------------------------------------------------------------------------------------------------------------------------------------------------------------------------------------------------------------------------------------------------------------------------------------|

|                           |                                                                                                                                                                                            |
|---------------------------|--------------------------------------------------------------------------------------------------------------------------------------------------------------------------------------------|
| Annual distance travelled | <ul style="list-style-type: none"> <li>● Settings of annual distance travelled for each vehicle type were based on Prakash and Habib (2018) and Pandey and Venkataraman (2014).</li> </ul> |
|---------------------------|--------------------------------------------------------------------------------------------------------------------------------------------------------------------------------------------|

#### (e) Japan

|                 |                                                                                                                                                                                                                                                                                                                                                                                                                                                                                                                                                                                                                                                                                                                                                                                                                                                                                                                                                                                                                                                                                                                                                                                                                                                                                                                                                                                                                                                 |
|-----------------|-------------------------------------------------------------------------------------------------------------------------------------------------------------------------------------------------------------------------------------------------------------------------------------------------------------------------------------------------------------------------------------------------------------------------------------------------------------------------------------------------------------------------------------------------------------------------------------------------------------------------------------------------------------------------------------------------------------------------------------------------------------------------------------------------------------------------------------------------------------------------------------------------------------------------------------------------------------------------------------------------------------------------------------------------------------------------------------------------------------------------------------------------------------------------------------------------------------------------------------------------------------------------------------------------------------------------------------------------------------------------------------------------------------------------------------------------|
| Annual mileages | <ul style="list-style-type: none"> <li>● Data sources: <ul style="list-style-type: none"> <li>➤ National annual mileages for each vehicle type (including different fuel types) among different vehicle speed categories were derived from reports of Pollutants Release and Transfer Register (METI, 2003-2017) during 2001-2015 and extrapolated to 1950 using trends of annual distances travelled for aggregated vehicle types in the Historical Statistics of Japan (Japan Statistical Association, 2006). Vehicle types were further divided into detailed categories using number of vehicles provided in the report of the Japan Auto-Oil Program (JATOP) Emission Inventory-Data Base (JEI-DB) (JPEC 2012a).</li> <li>➤ For regional distribution of national data, weighting factors during 1960-2015 were calculated using annual distances travelled of aggregated vehicle types in annual reports of road transport statistics (MLIT, 1961-2016). Before 1960, data in 1960 were used.</li> </ul> </li> <li>● Vehicle categories: <ul style="list-style-type: none"> <li>➤ Vehicle types include passenger cars (gasoline and LPG), light, medium and heavy trucks (gasoline and diesel), buses (gasoline and diesel), special purpose vehicles (gasoline and diesel), and several sizes of motorcycles. Trucks, buses, and special purpose vehicles were further divided into different weight categories.</li> </ul> </li> </ul> |
|-----------------|-------------------------------------------------------------------------------------------------------------------------------------------------------------------------------------------------------------------------------------------------------------------------------------------------------------------------------------------------------------------------------------------------------------------------------------------------------------------------------------------------------------------------------------------------------------------------------------------------------------------------------------------------------------------------------------------------------------------------------------------------------------------------------------------------------------------------------------------------------------------------------------------------------------------------------------------------------------------------------------------------------------------------------------------------------------------------------------------------------------------------------------------------------------------------------------------------------------------------------------------------------------------------------------------------------------------------------------------------------------------------------------------------------------------------------------------------|

#### (f) Republic of Korea

|                    |                                                                                                                                                                                                                                                                                                                                                                                                                                                                                                                                                                                                          |
|--------------------|----------------------------------------------------------------------------------------------------------------------------------------------------------------------------------------------------------------------------------------------------------------------------------------------------------------------------------------------------------------------------------------------------------------------------------------------------------------------------------------------------------------------------------------------------------------------------------------------------------|
| Number of vehicles | <ul style="list-style-type: none"> <li>● Data sources: <ul style="list-style-type: none"> <li>➤ National data of passenger cars, buses, trucks, and motorcycles during 1976-2015 were obtained from IRF (1976-2018) and extrapolated to 1950 using trends of number of vehicles for aggregated vehicle types in Mitchell (1998).</li> <li>➤ Number of LPG and CNG vehicles in 2010 were taken from a report of European Commission (Alternative fuels and infrastructure in seven non-EU markets) and the Gas Vehicles Report, respectively and extrapolated using trends of fuel</li> </ul> </li> </ul> |
|--------------------|----------------------------------------------------------------------------------------------------------------------------------------------------------------------------------------------------------------------------------------------------------------------------------------------------------------------------------------------------------------------------------------------------------------------------------------------------------------------------------------------------------------------------------------------------------------------------------------------------------|

|                           |                                                                                                                                                                                                                                                                                                                                                                                                                                                                                                                               |
|---------------------------|-------------------------------------------------------------------------------------------------------------------------------------------------------------------------------------------------------------------------------------------------------------------------------------------------------------------------------------------------------------------------------------------------------------------------------------------------------------------------------------------------------------------------------|
|                           | <p>consumption in IEAWEB.</p> <ul style="list-style-type: none"> <li>● Vehicle categories: <ul style="list-style-type: none"> <li>➤ Vehicle types include passenger cars (gasoline, diesel, and LPG), buses (gasoline, diesel, and CNG), light and heavy trucks (gasoline and diesel), rural vehicles, and several sizes of motorcycles. For relative ratios of number of gasoline and diesel vehicles, data of Streets et al. (2003) and REASv2 generally based on GAINS ASIA at that time were used.</li> </ul> </li> </ul> |
| Annual distance travelled | <ul style="list-style-type: none"> <li>● Settings of Singapore were used in REASv3 except for motorcycles which were taken from Jang et al. (2010).</li> </ul>                                                                                                                                                                                                                                                                                                                                                                |

#### **(g) Democratic People's Republic of Korea**

|                           |                                                                                                                                                                                                                                                                                                                                                                                                                                                   |
|---------------------------|---------------------------------------------------------------------------------------------------------------------------------------------------------------------------------------------------------------------------------------------------------------------------------------------------------------------------------------------------------------------------------------------------------------------------------------------------|
| Number of vehicles        | <ul style="list-style-type: none"> <li>● Data sources and vehicle categories: <ul style="list-style-type: none"> <li>➤ Number of gasoline and diesel vehicles for passenger cars, buses, light and heavy trucks, rural vehicles, and motorcycles in 2000 were taken from REASv1 generally based on Streets et al. (2003) and extrapolated using trends of gasoline and diesel oil consumption in road transport in IEAWEB.</li> </ul> </li> </ul> |
| Annual distance travelled | <ul style="list-style-type: none"> <li>● Annual vehicle kilometer travelled per vehicle type averaged in Asia provided in Clean Air Asia (2012) were used.</li> </ul>                                                                                                                                                                                                                                                                             |

#### **(h) Mongolia**

|                           |                                                                                                                                                                                                                                                                                                                                                                                                                                                                                                                                                                                                                                                                                           |
|---------------------------|-------------------------------------------------------------------------------------------------------------------------------------------------------------------------------------------------------------------------------------------------------------------------------------------------------------------------------------------------------------------------------------------------------------------------------------------------------------------------------------------------------------------------------------------------------------------------------------------------------------------------------------------------------------------------------------------|
| Number of vehicles        | <ul style="list-style-type: none"> <li>● Data sources: <ul style="list-style-type: none"> <li>➤ National data of passenger cars, buses, trucks, and motorcycles during 1950-2015 were obtained from National Statistics Office of Mongolia (<a href="https://www.en.nso.mn/">https://www.en.nso.mn/</a>).</li> </ul> </li> <li>● Vehicle categories: <ul style="list-style-type: none"> <li>➤ Vehicle types include gasoline and diesel passenger cars, buses, light and heavy trucks, and motorcycles. For relative ratios of gasoline and diesel vehicle numbers, data of Streets et al. (2003) and REASv2 generally based on GAINS ASIA at that time were used.</li> </ul> </li> </ul> |
| Annual distance travelled | <ul style="list-style-type: none"> <li>● Annual vehicle kilometer travelled per vehicle type averaged in Asia provided in Clean Air Asia (2012) were used.</li> </ul>                                                                                                                                                                                                                                                                                                                                                                                                                                                                                                                     |

**(i) Taiwan**

|                           |                                                                                                                                                                                                                                                                                                                                                                                                                                                                                                                                                                                                                                                                                                                                                                                                                                                                                                                                                                                                                                     |
|---------------------------|-------------------------------------------------------------------------------------------------------------------------------------------------------------------------------------------------------------------------------------------------------------------------------------------------------------------------------------------------------------------------------------------------------------------------------------------------------------------------------------------------------------------------------------------------------------------------------------------------------------------------------------------------------------------------------------------------------------------------------------------------------------------------------------------------------------------------------------------------------------------------------------------------------------------------------------------------------------------------------------------------------------------------------------|
| Number of vehicles        | <ul style="list-style-type: none"><li>● Data sources:<ul style="list-style-type: none"><li>➤ National data of passenger cars, buses, trucks, and motorcycles during 1976-2015 were obtained from IRF (1976-2018) and extrapolated to 1950 using trends of number of vehicles in National Statistics of Taiwan (<a href="https://eng.stat.gov.tw/mp.asp?mp=5">https://eng.stat.gov.tw/mp.asp?mp=5</a>).</li><li>➤ Number of LPG vehicles in 2010 were estimated based on ratios of vehicle numbers and fuel consumption in Rep. of Korea and extrapolated using trends of fuel consumption in IEAWEB.</li></ul></li><li>● Vehicle categories:<ul style="list-style-type: none"><li>➤ Vehicle types include passenger cars (gasoline, diesel, and LPG), buses (gasoline and diesel), light and heavy trucks (gasoline and diesel), and motorcycles. For relative ratios of number of gasoline and diesel vehicles, data of Streets et al. (2003) and REASv2 generally based on GAINS ASIA at that time were used.</li></ul></li></ul> |
| Annual distance travelled | <ul style="list-style-type: none"><li>● Settings of Singapore were used in REASv3.</li></ul>                                                                                                                                                                                                                                                                                                                                                                                                                                                                                                                                                                                                                                                                                                                                                                                                                                                                                                                                        |

**(j) Brunei**

|                           |                                                                                                                                                                                                                                                                                                                                                                                                                                                                                                                                                                                                                                                                                                                                                                      |
|---------------------------|----------------------------------------------------------------------------------------------------------------------------------------------------------------------------------------------------------------------------------------------------------------------------------------------------------------------------------------------------------------------------------------------------------------------------------------------------------------------------------------------------------------------------------------------------------------------------------------------------------------------------------------------------------------------------------------------------------------------------------------------------------------------|
| Number of vehicles        | <ul style="list-style-type: none"><li>● Data sources and vehicle categories:<ul style="list-style-type: none"><li>➤ National data of passenger cars, buses, trucks, and motorcycles during 2010-2015 were obtained from IRF (1976-2018) and extrapolated to 1950 using trends of fuel consumption in IEAWEB and those of number of vehicles for aggregated vehicle types in Mitchell (1998).</li></ul></li><li>● Vehicle categories:<ul style="list-style-type: none"><li>➤ Vehicle types include gasoline and diesel passenger cars, buses, light and heavy trucks, and motorcycles. For relative ratios of gasoline and diesel vehicle numbers, data of Streets et al. (2003) and REASv2 generally based on GAINS ASIA at that time were used.</li></ul></li></ul> |
| Annual distance travelled | <ul style="list-style-type: none"><li>● Annual vehicle kilometer travelled per vehicle type averaged in Asia provided in Clean Air Asia (2012) were used.</li></ul>                                                                                                                                                                                                                                                                                                                                                                                                                                                                                                                                                                                                  |

**(k) Cambodia**

|                           |                                                                                                                                                                                                                                                                                                                                                                                                                                                                                                                                                                                                                                                                                                                                               |
|---------------------------|-----------------------------------------------------------------------------------------------------------------------------------------------------------------------------------------------------------------------------------------------------------------------------------------------------------------------------------------------------------------------------------------------------------------------------------------------------------------------------------------------------------------------------------------------------------------------------------------------------------------------------------------------------------------------------------------------------------------------------------------------|
| Number of vehicles        | <ul style="list-style-type: none"><li>● Data sources:<ul style="list-style-type: none"><li>➤ National data of passenger cars, buses, trucks, and motorcycles during 1990-2015 were obtained from IRF (1976-2018) and extrapolated to 1950 using trends of fuel consumption in IEAWEB and those of number of vehicles for aggregated vehicle types in Mitchell (1998).</li></ul></li><li>● Vehicle categories:<ul style="list-style-type: none"><li>➤ Vehicle types include gasoline and diesel passenger cars, buses, light and heavy trucks, and motorcycles. For relative ratios of gasoline and diesel vehicle numbers, data of Streets et al. (2003) and REASv2 generally based on GAINS ASIA at that time were used.</li></ul></li></ul> |
| Annual distance travelled | <ul style="list-style-type: none"><li>● Annual vehicle kilometer travelled per vehicle type averaged in Asia provided in Clean Air Asia (2012) were used.</li></ul>                                                                                                                                                                                                                                                                                                                                                                                                                                                                                                                                                                           |

**(l) Indonesia**

|                           |                                                                                                                                                                                                                                                                                                                                                                                                                                                                                                                                                                                                                                                                                                                                          |
|---------------------------|------------------------------------------------------------------------------------------------------------------------------------------------------------------------------------------------------------------------------------------------------------------------------------------------------------------------------------------------------------------------------------------------------------------------------------------------------------------------------------------------------------------------------------------------------------------------------------------------------------------------------------------------------------------------------------------------------------------------------------------|
| Number of vehicles        | <ul style="list-style-type: none"><li>● Data sources:<ul style="list-style-type: none"><li>➤ National data of passenger cars, buses, trucks, and motorcycles during 1950-2015 were obtained from Statistics Indonesia (<a href="https://www.bps.go.id/linkTableDinamis/view/id/1133/">https://www.bps.go.id/linkTableDinamis/view/id/1133/</a>).</li></ul></li><li>● Vehicle categories:<ul style="list-style-type: none"><li>➤ Vehicle types include gasoline and diesel passenger cars, buses, light and heavy trucks, rural vehicles, and motorcycles. For relative ratios of gasoline and diesel vehicle numbers, data of Streets et al. (2003) and REASv2 generally based on GAINS ASIA at that time were used.</li></ul></li></ul> |
| Annual distance travelled | <ul style="list-style-type: none"><li>● Annual vehicle kilometer travelled per vehicle type in Indonesia provided in Clean Air Asia (2012) were used.</li></ul>                                                                                                                                                                                                                                                                                                                                                                                                                                                                                                                                                                          |

**(m) Laos**

|                    |                                                                                                                                                                                                                                                                                                                                                                          |
|--------------------|--------------------------------------------------------------------------------------------------------------------------------------------------------------------------------------------------------------------------------------------------------------------------------------------------------------------------------------------------------------------------|
| Number of vehicles | <ul style="list-style-type: none"><li>● Data sources:<ul style="list-style-type: none"><li>➤ National data of passenger cars, buses, trucks, and motorcycles during 1987-2015 were obtained from IRF (1976-2018) and extrapolated to 1950 using trends of fuel consumption in IEAWEB and those of number of vehicles for aggregated vehicle types in</li></ul></li></ul> |
|--------------------|--------------------------------------------------------------------------------------------------------------------------------------------------------------------------------------------------------------------------------------------------------------------------------------------------------------------------------------------------------------------------|

|                           |                                                                                                                                                                                                                                                                                                                                                                                                                           |
|---------------------------|---------------------------------------------------------------------------------------------------------------------------------------------------------------------------------------------------------------------------------------------------------------------------------------------------------------------------------------------------------------------------------------------------------------------------|
|                           | <p>Mitchell (1998).</p> <ul style="list-style-type: none"> <li>● Vehicle categories: <ul style="list-style-type: none"> <li>➢ Vehicle types include gasoline and diesel passenger cars, buses, light and heavy trucks, and motorcycles. For relative ratios of gasoline and diesel vehicle numbers, data of Streets et al. (2003) and REASv2 generally based on GAINS ASIA at that time were used.</li> </ul> </li> </ul> |
| Annual distance travelled | <ul style="list-style-type: none"> <li>● Annual vehicle kilometer travelled per vehicle type in Laos provided in Clean Air Asia (2012) were used.</li> </ul>                                                                                                                                                                                                                                                              |

#### **(n) Malaysia**

|                           |                                                                                                                                                                                                                                                                                                                                                                                                                                                                                                                                                                                                                                                                                                                                  |
|---------------------------|----------------------------------------------------------------------------------------------------------------------------------------------------------------------------------------------------------------------------------------------------------------------------------------------------------------------------------------------------------------------------------------------------------------------------------------------------------------------------------------------------------------------------------------------------------------------------------------------------------------------------------------------------------------------------------------------------------------------------------|
| Number of vehicles        | <ul style="list-style-type: none"> <li>● Data sources: <ul style="list-style-type: none"> <li>➢ National data of passenger cars, buses, trucks, and motorcycles during 1963-2015 were obtained from IRF (1976-2018) and extrapolated to 1950 using trends of number of vehicles for aggregated vehicle types in Mitchell (1998).</li> </ul> </li> <li>● Vehicle categories: <ul style="list-style-type: none"> <li>➢ Vehicle types include gasoline and diesel passenger cars, buses, light and heavy trucks, rural vehicles, and motorcycles. For relative ratios of gasoline and diesel vehicle numbers, data of Streets et al. (2003) and REASv2 generally based on GAINS ASIA at that time were used.</li> </ul> </li> </ul> |
| Annual distance travelled | <ul style="list-style-type: none"> <li>● Annual vehicle kilometer travelled per vehicle type in Malaysia provided in Clean Air Asia (2012) were used.</li> </ul>                                                                                                                                                                                                                                                                                                                                                                                                                                                                                                                                                                 |

#### **(o) Myanmar**

|                    |                                                                                                                                                                                                                                                                                                                                                                                                                                                                                                                                                                                                                                                                                         |
|--------------------|-----------------------------------------------------------------------------------------------------------------------------------------------------------------------------------------------------------------------------------------------------------------------------------------------------------------------------------------------------------------------------------------------------------------------------------------------------------------------------------------------------------------------------------------------------------------------------------------------------------------------------------------------------------------------------------------|
| Number of vehicles | <ul style="list-style-type: none"> <li>● Data sources: <ul style="list-style-type: none"> <li>➢ National data of passenger cars, buses, trucks, and motorcycles during 1993-2015 were obtained from IRF (1976-2018) and extrapolated to 1950 using trends of fuel consumption in IEAWEB and those of number of vehicles for aggregated vehicle types in Mitchell (1998).</li> </ul> </li> <li>● Vehicle categories: <ul style="list-style-type: none"> <li>➢ Vehicle types include gasoline and diesel passenger cars, buses, light and heavy trucks, and motorcycles. For relative ratios of gasoline and diesel vehicle numbers, data of Streets et al. (2003)</li> </ul> </li> </ul> |
|--------------------|-----------------------------------------------------------------------------------------------------------------------------------------------------------------------------------------------------------------------------------------------------------------------------------------------------------------------------------------------------------------------------------------------------------------------------------------------------------------------------------------------------------------------------------------------------------------------------------------------------------------------------------------------------------------------------------------|

|                           |                                                                                                                                                                       |
|---------------------------|-----------------------------------------------------------------------------------------------------------------------------------------------------------------------|
|                           | and REASv2 generally based on GAINS ASIA at that time were used.                                                                                                      |
| Annual distance travelled | <ul style="list-style-type: none"> <li>● Annual vehicle kilometer travelled per vehicle type averaged in Asia provided in Clean Air Asia (2012) were used.</li> </ul> |

#### **(p) Philippines**

|                           |                                                                                                                                                                                                                                                                                                                                                                                                                                                                                                                                                                                                                                                                                                                                  |
|---------------------------|----------------------------------------------------------------------------------------------------------------------------------------------------------------------------------------------------------------------------------------------------------------------------------------------------------------------------------------------------------------------------------------------------------------------------------------------------------------------------------------------------------------------------------------------------------------------------------------------------------------------------------------------------------------------------------------------------------------------------------|
| Number of vehicles        | <ul style="list-style-type: none"> <li>● Data sources: <ul style="list-style-type: none"> <li>➢ National data of passenger cars, buses, trucks, and motorcycles during 1981-2015 were obtained from IRF (1976-2018) and extrapolated to 1950 using trends of number of vehicles for aggregated vehicle types in Mitchell (1998).</li> </ul> </li> <li>● Vehicle categories: <ul style="list-style-type: none"> <li>➢ Vehicle types include gasoline and diesel passenger cars, buses, light and heavy trucks, rural vehicles, and motorcycles. For relative ratios of gasoline and diesel vehicle numbers, data of Streets et al. (2003) and REASv2 generally based on GAINS ASIA at that time were used.</li> </ul> </li> </ul> |
| Annual distance travelled | <ul style="list-style-type: none"> <li>● Annual vehicle kilometer travelled per vehicle type in Philippines provided in Clean Air Asia (2012) were used.</li> </ul>                                                                                                                                                                                                                                                                                                                                                                                                                                                                                                                                                              |

#### **(q) Singapore**

|                           |                                                                                                                                                                                                                                                                                                                                                                                                                                                                                                                                                                                                                                                                                                                  |
|---------------------------|------------------------------------------------------------------------------------------------------------------------------------------------------------------------------------------------------------------------------------------------------------------------------------------------------------------------------------------------------------------------------------------------------------------------------------------------------------------------------------------------------------------------------------------------------------------------------------------------------------------------------------------------------------------------------------------------------------------|
| Number of vehicles        | <ul style="list-style-type: none"> <li>● Data sources: <ul style="list-style-type: none"> <li>➢ National data of passenger cars, buses, trucks, and motorcycles during 1981-2015 were obtained from IRF (1976-2018) and extrapolated to 1950 using trends of number of vehicles for aggregated vehicle types in Mitchell (1998).</li> </ul> </li> <li>● Vehicle categories: <ul style="list-style-type: none"> <li>➢ Vehicle types include gasoline and diesel passenger cars, buses, light and heavy trucks, and motorcycles. For relative ratios of gasoline and diesel vehicle numbers, data of Streets et al. (2003) and REASv2 generally based on GAINS ASIA at that time were used.</li> </ul> </li> </ul> |
| Annual distance travelled | <ul style="list-style-type: none"> <li>● Annual vehicle kilometer travelled per vehicle type in Singapore provided in Clean Air Asia (2012) were used.</li> </ul>                                                                                                                                                                                                                                                                                                                                                                                                                                                                                                                                                |

**(r) Thailand**

|                           |                                                                                                                                                                                                                                                                                                                                                                                                                                                                                                                                                                                                                                                                                                                                                                                                                                                                |
|---------------------------|----------------------------------------------------------------------------------------------------------------------------------------------------------------------------------------------------------------------------------------------------------------------------------------------------------------------------------------------------------------------------------------------------------------------------------------------------------------------------------------------------------------------------------------------------------------------------------------------------------------------------------------------------------------------------------------------------------------------------------------------------------------------------------------------------------------------------------------------------------------|
| Number of vehicles        | <ul style="list-style-type: none"><li>● Data sources:<ul style="list-style-type: none"><li>➢ National data of passenger cars, buses, trucks, and motorcycles during 1967-2015 were obtained from IRF (1976-2018) and extrapolated to 1950 using trends of number of vehicles for aggregated vehicle types in Mitchell (1998).</li></ul></li><li>● Vehicle categories:<ul style="list-style-type: none"><li>➢ Vehicle types include gasoline, diesel, LPG, and CNG passenger cars, buses, and light and heavy trucks, rural vehicles, and motorcycles. For relative ratios of vehicles numbers of each fuel type, in addition to data of Streets et al. (2003) and REASv2 generally based on GAINS ASIA at that time, data in Chollacoop et al. (2011) and consumption amounts of LPG and CNG in road transport sector in IEAWEB were used.</li></ul></li></ul> |
| Annual distance travelled | <ul style="list-style-type: none"><li>● Annual vehicle kilometer travelled per vehicle type in Thailand provided in Clean Air Asia (2012) were used.</li></ul>                                                                                                                                                                                                                                                                                                                                                                                                                                                                                                                                                                                                                                                                                                 |

**(s) Vietnam**

|                           |                                                                                                                                                                                                                                                                                                                                                                                                                                                                                                                                                                                                                                                                                                                                                                          |
|---------------------------|--------------------------------------------------------------------------------------------------------------------------------------------------------------------------------------------------------------------------------------------------------------------------------------------------------------------------------------------------------------------------------------------------------------------------------------------------------------------------------------------------------------------------------------------------------------------------------------------------------------------------------------------------------------------------------------------------------------------------------------------------------------------------|
| Number of vehicles        | <ul style="list-style-type: none"><li>● Data sources:<ul style="list-style-type: none"><li>➢ National data of passenger cars, buses, trucks, and motorcycles during 2007 were obtained from IRF (1976-2018) and extrapolated to 1950 using trends of fuel consumption in IEAWEB and those of number of vehicles for aggregated vehicle types in Mitchell (1998).</li></ul></li><li>● Vehicle categories:<ul style="list-style-type: none"><li>➢ Vehicle types include gasoline and diesel passenger cars, small and large buses, light and heavy trucks, rural vehicles, and motorcycles. For relative ratios of gasoline and diesel vehicle numbers, data of Streets et al. (2003) and REASv2 generally based on GAINS ASIA at that time were used.</li></ul></li></ul> |
| Annual distance travelled | <ul style="list-style-type: none"><li>● Annual vehicle kilometer travelled per vehicle type in Vietnam provided in Clean Air Asia (2012) as well as Manh et al. (2011) were used.</li></ul>                                                                                                                                                                                                                                                                                                                                                                                                                                                                                                                                                                              |

**(t) Afghanistan**

|                           |                                                                                                                                                                                                                                                                                                                                                                                                                                                                                                                                                                                                                                                                                   |
|---------------------------|-----------------------------------------------------------------------------------------------------------------------------------------------------------------------------------------------------------------------------------------------------------------------------------------------------------------------------------------------------------------------------------------------------------------------------------------------------------------------------------------------------------------------------------------------------------------------------------------------------------------------------------------------------------------------------------|
| Number of vehicles        | <ul style="list-style-type: none"><li>● Data sources:<ul style="list-style-type: none"><li>➤ National data of passenger cars, buses, trucks, and motorcycles during 1975-2015 were obtained from IRF (1976-2018) and extrapolated to 1950 using trends number of vehicles for aggregated vehicle types in Mitchell (1998).</li></ul></li><li>● Vehicle categories:<ul style="list-style-type: none"><li>➤ Vehicle types include gasoline and diesel passenger cars, buses, light and heavy trucks, and motorcycles. For relative ratios of gasoline and diesel vehicle numbers, data of India in REASv2 generally based on GAINS ASIA at that time were used.</li></ul></li></ul> |
| Annual distance travelled | <ul style="list-style-type: none"><li>● Annual vehicle kilometer travelled per vehicle type averaged in Asia provided in Clean Air Asia (2012) were used.</li></ul>                                                                                                                                                                                                                                                                                                                                                                                                                                                                                                               |

**(u) Bangladesh**

|                           |                                                                                                                                                                                                                                                                                                                                                                                                                                                                                                                                                                                                                                                                                                                                                                                                                                                    |
|---------------------------|----------------------------------------------------------------------------------------------------------------------------------------------------------------------------------------------------------------------------------------------------------------------------------------------------------------------------------------------------------------------------------------------------------------------------------------------------------------------------------------------------------------------------------------------------------------------------------------------------------------------------------------------------------------------------------------------------------------------------------------------------------------------------------------------------------------------------------------------------|
| Number of vehicles        | <ul style="list-style-type: none"><li>● Data sources:<ul style="list-style-type: none"><li>➤ National data of passenger cars, taxis, jeeps, buses, trucks, rural vehicles and motorcycles during 2000-2015 were obtained from Statistical Yearbook of Bangladesh (2013-2016) and extrapolated to 1950 using trends number of vehicles for aggregated vehicle types in Mitchell (1998).</li></ul></li><li>● Vehicle categories:<ul style="list-style-type: none"><li>➤ Vehicle types include gasoline, diesel, and CNG passenger cars, taxis, jeeps, small and large buses, light and heavy trucks, rural vehicles and motorcycles. For relative ratios of gasoline and diesel vehicle numbers, Wadud and Khan (2011) as well as data of Streets et al. (2003) and REASv2 generally based on GAINS ASIA at that time were used.</li></ul></li></ul> |
| Annual distance travelled | <ul style="list-style-type: none"><li>● Annual vehicle kilometer travelled per vehicle type in Bangladesh provided in Clean Air Asia (2012) were used.</li></ul>                                                                                                                                                                                                                                                                                                                                                                                                                                                                                                                                                                                                                                                                                   |

**(v) Bhutan**

|                    |                                                                                                                                                                                                                                                                                                             |
|--------------------|-------------------------------------------------------------------------------------------------------------------------------------------------------------------------------------------------------------------------------------------------------------------------------------------------------------|
| Number of vehicles | <ul style="list-style-type: none"><li>● Data sources:<ul style="list-style-type: none"><li>➤ National data of passenger cars, buses, trucks, and motorcycles during 1994-2015 were obtained from IRF (1976-2018) and extrapolated to 1950 using trends of number of vehicles taken from</li></ul></li></ul> |
|--------------------|-------------------------------------------------------------------------------------------------------------------------------------------------------------------------------------------------------------------------------------------------------------------------------------------------------------|

|                           |                                                                                                                                                                                                                                                                                                                                                                                                                                                                                                                                                                             |
|---------------------------|-----------------------------------------------------------------------------------------------------------------------------------------------------------------------------------------------------------------------------------------------------------------------------------------------------------------------------------------------------------------------------------------------------------------------------------------------------------------------------------------------------------------------------------------------------------------------------|
|                           | <p>Statistical Yearbook of Bhutan<br/>(<a href="http://www.nsb.gov.bt/publication/publications.php?id=3">http://www.nsb.gov.bt/publication/publications.php?id=3</a>)</p> <ul style="list-style-type: none"> <li>● Vehicle categories: <ul style="list-style-type: none"> <li>➤ Vehicle types include gasoline and diesel passenger cars, buses, light and heavy trucks, and motorcycles. For relative ratios of gasoline and diesel vehicle numbers, data of Streets et al. (2003) and REASv2 generally based on GAINS ASIA at that time were used.</li> </ul> </li> </ul> |
| Annual distance travelled | <ul style="list-style-type: none"> <li>● Annual vehicle kilometer travelled per vehicle type averaged in Asia provided in Clean Air Asia (2012) were used.</li> </ul>                                                                                                                                                                                                                                                                                                                                                                                                       |

#### **(w) Nepal**

|                           |                                                                                                                                                                                                                                                                                                                                                                                                                                                                                                                                                                                                                                  |
|---------------------------|----------------------------------------------------------------------------------------------------------------------------------------------------------------------------------------------------------------------------------------------------------------------------------------------------------------------------------------------------------------------------------------------------------------------------------------------------------------------------------------------------------------------------------------------------------------------------------------------------------------------------------|
| Number of vehicles        | <ul style="list-style-type: none"> <li>● Data sources and vehicle categories: <ul style="list-style-type: none"> <li>➤ National data of passenger cars/jeeps, 3 wheeler vehicle, taxis, micro, mini and medium buses, mini and medium trucks, pickup and motorcycles in 2013 and trends during 1990-2012 for aggregated vehicle types were derived from Malla (2014).</li> <li>➤ Malla (2014) provided fuel types and ratios of operational to registered vehicle for each vehicle type.</li> <li>➤ Before 1990, data during 1950-2015 were estimated based on trends of fuel consumption data in IEAWEB.</li> </ul> </li> </ul> |
| Annual distance travelled | <ul style="list-style-type: none"> <li>● Settings of annual distance travelled for each vehicle type were based on Malla. (2014).</li> </ul>                                                                                                                                                                                                                                                                                                                                                                                                                                                                                     |

#### **(x) Pakistan**

|                    |                                                                                                                                                                                                                                                                                                                                                                                                                                                                                                                                                                                                                                                                                                                                                                                                                                   |
|--------------------|-----------------------------------------------------------------------------------------------------------------------------------------------------------------------------------------------------------------------------------------------------------------------------------------------------------------------------------------------------------------------------------------------------------------------------------------------------------------------------------------------------------------------------------------------------------------------------------------------------------------------------------------------------------------------------------------------------------------------------------------------------------------------------------------------------------------------------------|
| Number of vehicles | <ul style="list-style-type: none"> <li>● Data sources: <ul style="list-style-type: none"> <li>➤ National data of motor cars/jeeps, taxis, buses, trucks, motorcycles, 3 wheeler vehicles during 2001-2012 were taken from Pakistan Statistical Yearbook (<a href="http://www.pbs.gov.pk/publications/">http://www.pbs.gov.pk/publications/</a>) and were extrapolated to 1963 and 2015 using trends of number of vehicles in IRF (1976-2018).</li> </ul> </li> <li>● Vehicle categories: <ul style="list-style-type: none"> <li>➤ Vehicle types include gasoline, diesel, and CNG passenger cars, taxis, mall and large buses, light and heavy trucks, rural vehicles and motorcycles. For relative ratios of gasoline, diesel, and CNG vehicle numbers, Khan and Yasmin (2014) as well as data of Streets</li> </ul> </li> </ul> |
|--------------------|-----------------------------------------------------------------------------------------------------------------------------------------------------------------------------------------------------------------------------------------------------------------------------------------------------------------------------------------------------------------------------------------------------------------------------------------------------------------------------------------------------------------------------------------------------------------------------------------------------------------------------------------------------------------------------------------------------------------------------------------------------------------------------------------------------------------------------------|

|                           |                                                                                                                                                                  |
|---------------------------|------------------------------------------------------------------------------------------------------------------------------------------------------------------|
|                           | et al. (2003) and REASv2 generally based on GAINS ASIA at that time were used.                                                                                   |
| Annual distance travelled | <ul style="list-style-type: none"> <li>● Annual vehicle kilometer travelled per vehicle type in Pakistan provided in Clean Air Asia (2012) were used.</li> </ul> |

#### (y) Sri Lanka

|                           |                                                                                                                                                                                                                                                                                                                                                                                                                                                                                                                                                                                                                                                                                                                  |
|---------------------------|------------------------------------------------------------------------------------------------------------------------------------------------------------------------------------------------------------------------------------------------------------------------------------------------------------------------------------------------------------------------------------------------------------------------------------------------------------------------------------------------------------------------------------------------------------------------------------------------------------------------------------------------------------------------------------------------------------------|
| Number of vehicles        | <ul style="list-style-type: none"> <li>● Data sources: <ul style="list-style-type: none"> <li>➤ National data of passenger cars, buses, trucks, and motorcycles during 1963-2015 were obtained from IRF (1976-2018) and extrapolated to 1950 using trends of number of vehicles for aggregated vehicle types in Mitchell (1998).</li> </ul> </li> <li>● Vehicle categories: <ul style="list-style-type: none"> <li>➤ Vehicle types include gasoline and diesel passenger cars, buses, light and heavy trucks, and motorcycles. For relative ratios of gasoline and diesel vehicle numbers, data of Streets et al. (2003) and REASv2 generally based on GAINS ASIA at that time were used.</li> </ul> </li> </ul> |
| Annual distance travelled | <ul style="list-style-type: none"> <li>● Annual vehicle kilometer travelled per vehicle type in Sri Lanka provided in Clean Air Asia (2012) were used.</li> </ul>                                                                                                                                                                                                                                                                                                                                                                                                                                                                                                                                                |

#### (z) Maldives

|                           |                                                                                                                                                                                                                                                                                                                                                                                                                                                                                                                                                                                     |
|---------------------------|-------------------------------------------------------------------------------------------------------------------------------------------------------------------------------------------------------------------------------------------------------------------------------------------------------------------------------------------------------------------------------------------------------------------------------------------------------------------------------------------------------------------------------------------------------------------------------------|
| Number of vehicles        | <ul style="list-style-type: none"> <li>● Data sources: <ul style="list-style-type: none"> <li>➤ National data of passenger cars, buses, trucks, and motorcycles during 1991-2015 were obtained from IRF (1976-2018).</li> </ul> </li> <li>● Vehicle categories: <ul style="list-style-type: none"> <li>➤ Vehicle types include gasoline and diesel passenger cars, buses, light and heavy trucks, and motorcycles. For relative ratios of gasoline and diesel vehicle numbers, data of India in REASv2 generally based on GAINS ASIA at that time were used.</li> </ul> </li> </ul> |
| Annual distance travelled | <ul style="list-style-type: none"> <li>● Annual vehicle kilometer travelled per vehicle type averaged in Asia provided in Clean Air Asia (2012) were used.</li> </ul>                                                                                                                                                                                                                                                                                                                                                                                                               |

### **S6.1.2 Fuel consumption**

In REASv3, emissions of SO<sub>2</sub> and CO<sub>2</sub> were calculated using fuel consumption amounts. In order to estimate emissions from each vehicle type, total fuel consumption in road transport sector (see Sect. S3.1.2) needs to be distributed to each type of vehicles. The distributions were performed in each country and region based on weighting factors which were products of annual mileages (see S6.1.1) and fuel efficiencies of each vehicle type. In this sub-section, the fuel efficiencies used in REASv3 are described.

The fuel efficiencies were taken from Clean Air Asia (2012) for following countries: Indonesia, Laos, Malaysia, Philippines, Singapore, Thailand, Vietnam, Bangladesh, Nepal, Pakistan, and Sri Lanka. For Republic of Korea, Taiwan, Hong Kong, and Macau, data of Singapore were used the same as for the annual distance travelled. For North Korea, Mongolia, Brunei, Cambodia, and Myanmar, averaged data of Southeast Asian countries in Clean Air Asia (2012) were used. Similarly, averaged values of South Asian countries in Clean Air Asia (2012) were used for Afghanistan, Bhutan, and Maldives. For China, the fuel efficiencies were derived from Yan and Crookes (2009). For Japan, fuel consumption in vehicle type are available in each region after 2009. Before 2008, the data in 2009 were extrapolated using trend of annual mileages for each vehicle type in each region and used as weighting factors to distribute regional fuel consumption in road transport to each vehicle type.

## **S6.2 Emission factors of exhaust emissions**

### **S6.2.1 NO<sub>x</sub>, CO, NMVOC, and PM species**

In REASv3, emission factors of NO<sub>x</sub>, CO, NMVOC, and PM species for exhaust emissions from road vehicles were estimated as follows:

1. Emission factors of each vehicle type in a base year (different from country to country) were estimated.
2. Trends of the emission factors for each vehicle type were estimated considering the timing of road vehicle regulations in each country and the regions and the ratios of vehicles production years.
3. Emission factors of each vehicle type during 1950-2015 were calculated using those of base years and the corresponding trends.

The information of road vehicle regulations in each country and regions were taken from Clean Air Asia (2014). For the ratios of vehicle production years, due to lack of information, data for Macau derived from Zhang et al. (2016) were used for Hong Kong, Republic of Korea, and Taiwan and

those from Japan Environmental Sanitation Center and Suuri Keikaku (2011) for Vietnam were used for other countries and regions. Then, trends of emission factors were estimated using the above data and information with values of Europe and United States standards. Finally, emission factors used to estimate emissions were calculated for each vehicle type.

In this sub-section, ranges of emission factors during 1950-2015 used in REASv3 were presented in Tables 6.2-6.5 for following major vehicles types: CARG, CARD, LDTG, LDTD, HDTG, HDTD, BUSG, BUSD, and MC (CAR: Passenger cars, LDT: Light duty trucks, HDT: Heavy duty trucks, BUS: Buses, MC: Motorcycles, G: Gasoline vehicles, and D: Diesel vehicles). For PM species, referring Klimont et al. (2002b) and Bond et al. (2004), ratios of PM<sub>2.5</sub>, BC, and OC to PM<sub>10</sub> were assumed as follows:

- PM<sub>2.5</sub>/PM<sub>10</sub>: 0.95 for gasoline and light diesel vehicles, 1.0 for heavy diesel vehicles, and 0.9 for LPG and CNG vehicles.
- BC/PM<sub>10</sub>: 0.34 for gasoline vehicles and 0.66 for diesel vehicles.
- OC/PM<sub>10</sub>: 0.36 for gasoline vehicles and 0.21 for diesel vehicles.
- BC and OC emissions from LPG and CNV vehicles were neglected.

Note that emissions from road vehicles in Japan were estimated by different methodology as described in Sect. S.6.2.4.

**Table 6.2.** Emission factors of NO<sub>x</sub>, CO, NMVOC (NMV), and PM<sub>10</sub> for exhaust emissions from road vehicle in China. Unit is g/km (expressed as NO<sub>2</sub> for NO<sub>x</sub>).

| g/km             | CARG <sup>c</sup>                   | LDTG                                | LDTD                              | HDTG                               | HDTD                             |
|------------------|-------------------------------------|-------------------------------------|-----------------------------------|------------------------------------|----------------------------------|
| NO <sub>x</sub>  | 0.25-2.70<br>(0.53) <sup>a</sup>    | 0.23-3.00<br>(0.53) <sup>a</sup>    | 2.22-5.00<br>(2.85) <sup>a</sup>  | 0.78-2.18<br>(1.91) <sup>a</sup>   | 5.41-9.03<br>(7.65) <sup>a</sup> |
| CO               | 2.72-29.7<br>(5.93) <sup>a</sup>    | 3.17-40.0<br>(8.01) <sup>a</sup>    | 1.20-9.46<br>(1.89) <sup>a</sup>  | 5.26-81.6<br>(16.3) <sup>a</sup>   | 1.95-27.2<br>(5.44) <sup>a</sup> |
| NMV              | 0.33-1.89<br>(0.66) <sup>a</sup>    | 0.41-3.53<br>(0.88) <sup>a</sup>    | 0.37-2.50<br>(0.75) <sup>a</sup>  | 0.24-4.00<br>(1.47) <sup>a</sup>   | 0.32-1.47<br>(0.98) <sup>a</sup> |
| PM <sub>10</sub> | 0.013-0.019<br>(0.016) <sup>a</sup> | 0.012-0.021<br>(0.016) <sup>a</sup> | 0.075-0.37<br>(0.15) <sup>a</sup> | 0.042-0.17<br>(0.081) <sup>a</sup> | 0.13-0.63<br>(0.29) <sup>a</sup> |
| g/km             | BUSG                                | BUSD                                | MC                                | BUS(LPG) <sup>b</sup>              | BUS(CNG) <sup>b</sup>            |
| NO <sub>x</sub>  | 0.92-2.14<br>(1.91) <sup>a</sup>    | 5.75-8.79<br>(7.65) <sup>a</sup>    | 0.17-0.29<br>(0.22) <sup>a</sup>  | 2.60                               | 5.70                             |
| CO               | 6.34-81.6<br>(16.3) <sup>a</sup>    | 2.43-27.2<br>(5.44) <sup>a</sup>    | 8.64-25.2<br>(12.9) <sup>a</sup>  | 1.00                               | 12.0                             |
| NMV              | 0.40-4.00<br>(1.47) <sup>a</sup>    | 0.37-1.37<br>(0.98) <sup>a</sup>    | 2.41-5.45<br>(3.59) <sup>a</sup>  | 0.70                               | 1.40                             |

|                  |                                    |                                  |                                   |       |       |
|------------------|------------------------------------|----------------------------------|-----------------------------------|-------|-------|
| PM <sub>10</sub> | 0.050-0.15<br>(0.081) <sup>a</sup> | 0.16-0.55<br>(0.29) <sup>a</sup> | 0.060-0.16<br>(0.10) <sup>a</sup> | 0.033 | 0.033 |
|------------------|------------------------------------|----------------------------------|-----------------------------------|-------|-------|

a. Emission factors in 2010 used as based data estimated referring Wu et al. (2011), Huo et al. (2012b; 2012c), Zhao et al. (2012), Zhang et al. (2013), and Xia et al. (2016). b. ABC Emission Inventory Manual (Shrestha et al., 2013). c. CARD was not categorized.

**Table 6.3.** Emission factors of NO<sub>x</sub>, CO, NMVOC (NMV), and PM<sub>10</sub> for exhaust emissions from road vehicle in India. Unit is g/km (expressed as NO<sub>2</sub> for NO<sub>x</sub>).

| g/km             | CARG <sup>c</sup>                   | LDTG                             | LDTD                             | HDTD <sup>c</sup>                 | BUSD <sup>c</sup>                |
|------------------|-------------------------------------|----------------------------------|----------------------------------|-----------------------------------|----------------------------------|
| NO <sub>x</sub>  | 0.98-2.70<br>(1.79) <sup>a</sup>    | 1.28-2.70<br>(2.24) <sup>a</sup> | 5.22-9.00<br>(6.77) <sup>a</sup> | 7.81-12.80<br>(11.3) <sup>a</sup> | 5.70-9.08<br>(8.16) <sup>a</sup> |
| CO               | 1.62-9.01<br>(3.50) <sup>a</sup>    | 2.27-10.3<br>(4.00) <sup>a</sup> | 2.80-8.12<br>(4.00) <sup>a</sup> | 4.40-14.8<br>(11.9) <sup>a</sup>  | 5.24-14.3<br>(11.9) <sup>a</sup> |
| NMV              | 0.41-2.06<br>(0.80) <sup>a</sup>    | 0.58-2.91<br>(1.13) <sup>a</sup> | 0.53-1.19<br>(1.13) <sup>a</sup> | 0.47-1.96<br>(1.38) <sup>a</sup>  | 0.51-2.20<br>(1.09) <sup>a</sup> |
| PM <sub>10</sub> | 0.13-0.19<br>(0.18) <sup>a</sup>    | 0.43-0.68<br>(0.65) <sup>a</sup> | 0.32-1.63<br>(0.65) <sup>a</sup> | 0.55-2.79<br>(1.41) <sup>a</sup>  | 0.33-1.26<br>(0.72) <sup>a</sup> |
| g/km             | MC                                  | CAR_CNG <sup>b</sup>             | BUS_CNG <sup>b</sup>             |                                   |                                  |
| NO <sub>x</sub>  | 0.20-0.30<br>(0.24) <sup>a</sup>    | 2.10                             | 5.70                             |                                   |                                  |
| CO               | 1.98-15.7<br>(8.04) <sup>a</sup>    | 4.00                             | 12.0                             |                                   |                                  |
| NMV              | 1.63-4.60<br>(2.46) <sup>a</sup>    | 0.50                             | 1.40                             |                                   |                                  |
| PM <sub>10</sub> | 0.025-0.049<br>(0.030) <sup>a</sup> | 0.067                            | 0.067                            |                                   |                                  |

a. Emission factors in 2010 used as based data estimated referring Mishra et al. (2014), Sahu et al. (2014), and Pandey and Venkataraman. (2014). b. ABC Emission Inventory Manual (Shrestha et al., 2013). c. CARD, HDTG, and BUSG were not categorized.

### Other East Asian countries

Emission factors of Republic of Korea and Taiwan were estimated with high uncertainties based on values of Europe and United States standards, respectively. For Democratic People's Republic of Korea and Mongolia, emission factors used in REASv1 and REASv2 were adopted. Ranges of emission factors are presented in Table 6.4.

**Table 6.4.** Emission factors of NO<sub>x</sub>, CO, NMVOC (NMV), and PM<sub>10</sub> for exhaust emissions from road vehicle in other East Asian countries. Unit is g/km (expressed as NO<sub>2</sub> for NO<sub>x</sub>).

**(a) Republic of Korea**

| g/km             | CARG          | CARD        | LDTG          | LDTD       | HDTG         |
|------------------|---------------|-------------|---------------|------------|--------------|
| NO <sub>x</sub>  | 0.10-2.70     | 0.34-0.67   | 0.10-2.14     | 0.50-0.90  | 3.01-5.37    |
| CO               | 0.41-8.60     | 0.10-0.57   | 1.60-14.1     | 0.17-0.91  | 8.52-35.2    |
| NMV              | 0.084-0.92    | 0.026-0.25  | 0.12-2.07     | 0.063-0.15 | 0.55-3.09    |
| PM <sub>10</sub> | 0.0018-0.0030 | 0.018-0.20  | 0.0017-0.0030 | 0.014-0.28 | 0.0017-0.014 |
| g/km             | HDTD          | BUSG        | BUSD          | MC         |              |
| NO <sub>x</sub>  | 3.04-12.0     | 5.17-8.42   | 5.59-9.09     | 0.05-0.43  |              |
| CO               | 0.23-0.94     | 0.51-1.63   | 0.25-0.81     | 4.43-20.1  |              |
| NMV              | 0.066-0.37    | 0.21-2.8    | 0.11-0.41     | 0.64-6.76  |              |
| PM <sub>10</sub> | 0.021-0.62    | 0.012-0.060 | 0.11-1.01     | 0.010-0.14 |              |
| g/km             | CAR/LPG       | BUS/CNG     |               |            |              |
| NO <sub>x</sub>  | 0.056         | 2.50        |               |            |              |
| CO               | 0.62          | 1.00        |               |            |              |
| NMV              | 0.10          | 0.052       |               |            |              |
| PM <sub>10</sub> | 0.0012        | 0.0012      |               |            |              |

**(b) Taiwan**

| g/km             | CARG          | CARD       | LDTG          | LDTD       | HDTG         |
|------------------|---------------|------------|---------------|------------|--------------|
| NO <sub>x</sub>  | 0.30-2.70     | 0.55-1.11  | 0.28-3.10     | 1.02-1.66  | 3.62-6.81    |
| CO               | 1.38-8.60     | 0.14-0.50  | 3.64-23.4     | 2.21-6.26  | 8.75-45.0    |
| NMV              | 0.21-2.10     | 0.045-0.29 | 0.19-2.84     | 0.094-0.15 | 0.92-4.00    |
| PM <sub>10</sub> | 0.0015-0.0020 | 0.053-0.27 | 0.0021-0.0030 | 0.029-0.28 | 0.0080-0.068 |
| g/km             | HDTD          | BUSG       | BUSD          | MC         | CAR/LPG      |
| NO <sub>x</sub>  | 3.99-7.50     | 5.72-9.66  | 8.74-14.8     | 0.19-0.39  | 0.056        |
| CO               | 0.36-2.19     | 3.19-13.0  | 1.19-4.83     | 2.70-16.4  | 0.62         |
| NMV              | 0.12-1.04     | 0.55-2.50  | 0.42-1.90     | 1.18-3.09  | 0.1          |
| PM <sub>10</sub> | 0.11-0.93     | 0.023-0.12 | 0.20-1.05     | 0.086-0.32 | 0.0012       |

**(c) Democratic People's Republic of Korea and Mongolia**

| g/km             | CARG  | CARD  | LDTG  | LDTD  | HDTG  |
|------------------|-------|-------|-------|-------|-------|
| NO <sub>x</sub>  | 1.79  | 2.39  | 3.51  | 2.58  | 9.56  |
| CO               | 69.3  | 12.1  | 69.3  | 12.1  | 135.0 |
| NMV              | 3.82  | 0.16  | 3.44  | 0.13  | 5.25  |
| PM <sub>10</sub> | 0.033 | 0.34  | 0.033 | 0.34  | 0.066 |
| g/km             | HDTD  | BUSG  | BUSD  | MC    |       |
| NO <sub>x</sub>  | 24.1  | 9.56  | 24.1  | 0.12  |       |
| CO               | 17.7  | 135.0 | 17.7  | 21.1  |       |
| NMV              | 0.72  | 1.99  | 1.99  | 6.05  |       |
| PM <sub>10</sub> | 0.47  | 0.066 | 0.47  | 0.033 |       |

**Southeast Asian countries**

For Southeast Asian countries, default emission factors were assumed based on Boken et al. (2007) and used as uncontrolled values. Then, emission factors during 1950-2015 were estimated considering effects of regulations. Ranges of emission factors of Southeast Asian countries are presented in the following tables.

**Table 6.5.** Emission factors of NO<sub>x</sub>, CO, NMVOC (NMV), and PM<sub>10</sub> for exhaust emissions from road vehicle in Southeast Asian countries. Unit is g/km (expressed as NO<sub>2</sub> for NO<sub>x</sub>).

**(a) Brunei, Cambodia, Laos, and Myanmar**

| g/km <sup>a</sup> | CARG   | CARD  | LDTG   | LDTD | HDTG  |
|-------------------|--------|-------|--------|------|-------|
| NO <sub>x</sub>   | 2.50   | 2.77  | 3.20   | 3.15 | 4.00  |
| CO                | 15.4   | 1.07  | 28.0   | 2.00 | 45.0  |
| NMV               | 1.70   | 0.99  | 2.40   | 1.28 | 4.00  |
| PM <sub>10</sub>  | 0.0030 | 0.23  | 0.0060 | 0.63 | 0.025 |
| g/km <sup>a</sup> | HDTD   | BUSG  | BUSD   | MC   |       |
| NO <sub>x</sub>   | 11.7   | 4.00  | 14.8   | 0.15 |       |
| CO                | 3.30   | 45.0  | 6.00   | 15.9 |       |
| NMV               | 2.00   | 4.00  | 3.70   | 4.30 |       |
| PM <sub>10</sub>  | 0.62   | 0.025 | 2.08   | 0.10 |       |

a. Due to lack of information for regulations, default emission factors were used without changes during 1950-2015 for Brunei, Cambodia, Laos, and Myanmar.

**(b) Indonesia**

| g/km             | CARG      | CARD        | LDTG      | LDTD       | HDTG         |
|------------------|-----------|-------------|-----------|------------|--------------|
| NO <sub>x</sub>  | 0.79-2.50 | 1.87-2.77   | 0.62-3.20 | 2.42-3.15  | 2.84-4.00    |
| CO               | 5.53-15.4 | 0.61-1.07   | 9.25-28.0 | 1.01-2.00  | 22.6-45.0    |
| NMV              | 0.61-1.70 | 0.41-0.99   | 0.49-2.40 | 1.28       | 1.64-4.00    |
| PM <sub>10</sub> | 0.0030    | 0.099-0.23  | 0.0060    | 0.26-0.63  | 0.0080-0.025 |
| g/km             | HDTD      | BUSG        | BUSD      | MC         |              |
| NO <sub>x</sub>  | 8.30-11.7 | 3.05-4.00   | 11.3-14.8 | 0.11-0.15  |              |
| CO               | 1.66-3.30 | 26.8-45.0   | 3.57-6.00 | 7.49-15.9  |              |
| NMV              | 0.82-2.00 | 2.03-4.00   | 1.88-3.70 | 2.87-4.30  |              |
| PM <sub>10</sub> | 0.20-0.62 | 0.010-0.025 | 0.87-2.08 | 0.045-0.10 |              |

**(c) Malaysia**

| g/km             | CARG          | CARD        | LDTG          | LDTD       | HDTG        |
|------------------|---------------|-------------|---------------|------------|-------------|
| NO <sub>x</sub>  | 0.17-2.50     | 2.23-2.77   | 0.17-3.20     | 2.32-3.15  | 3.74-4.00   |
| CO               | 2.23-15.4     | 0.56-1.07   | 5.91-28.0     | 0.86-2.00  | 36.4-45.0   |
| NMV              | 0.19-1.70     | 0.26-0.99   | 0.16-2.40     | 1.28       | 3.18-4.00   |
| PM <sub>10</sub> | 0.0023-0.0030 | 0.074-0.23  | 0.0041-0.0060 | 0.21-0.63  | 0.015-0.025 |
| g/km             | HDTD          | BUSG        | BUSD          | MC         |             |
| NO <sub>x</sub>  | 11.0-11.7     | 3.8-4.00    | 14.1-14.8     | 0.08-0.15  |             |
| CO               | 2.67-3.30     | 37.5-45.0   | 5.00-6.00     | 3.28-15.9  |             |
| NMV              | 1.59-2.00     | 3.33-4.00   | 3.08-3.70     | 1.92-4.30  |             |
| PM <sub>10</sub> | 0.37-0.62     | 0.016-0.025 | 1.37-2.08     | 0.025-0.10 |             |

**(d) Philippines**

| g/km             | CARG      | CARD        | LDTG      | LDTD       | HDTG        |
|------------------|-----------|-------------|-----------|------------|-------------|
| NO <sub>x</sub>  | 0.73-2.50 | 1.95-2.77   | 0.56-3.20 | 2.40-3.15  | 3.52-4.00   |
| CO               | 5.24-15.4 | 0.60-1.07   | 8.85-28.0 | 0.97-2.00  | 36.9-45.0   |
| NMV              | 0.58-1.70 | 0.38-0.99   | 0.45-2.40 | 1.28       | 2.73-4.00   |
| PM <sub>10</sub> | 0.0030    | 0.096-0.23  | 0.0060    | 0.25-0.63  | 0.013-0.025 |
| g/km             | HDTD      | BUSG        | BUSD      | MC         |             |
| NO <sub>x</sub>  | 10.3-11.7 | 3.58-4.00   | 13.3-14.8 | 0.12-0.15  |             |
| CO               | 2.71-3.30 | 38.0-45.0   | 5.07-6.00 | 7.44-15.9  |             |
| NMV              | 1.37-2.00 | 2.90-4.00   | 2.68-3.70 | 2.86-4.30  |             |
| PM <sub>10</sub> | 0.31-0.62 | 0.014-0.025 | 1.19-2.08 | 0.050-0.10 |             |

**(e) Singapore**

| g/km             | CARG          | CARD         | LDTG          | LDTD       | HDTG         |
|------------------|---------------|--------------|---------------|------------|--------------|
| NO <sub>x</sub>  | 0.24-2.50     | 1.39-2.77    | 0.22-3.20     | 1.69-3.15  | 1.92-4.00    |
| CO               | 2.40-15.4     | 0.25-1.07    | 5.51-28.0     | 0.48-2.00  | 7.86-45.0    |
| NMV              | 0.27-1.70     | 0.13-0.99    | 0.19-2.40     | 0.45-1.28  | 0.54-4.00    |
| PM <sub>10</sub> | 0.0027-0.0030 | 0.039-0.23   | 0.0051-0.0060 | 0.073-0.63 | 0.0036-0.025 |
| g/km             | HDTD          | BUSG         | BUSD          | MC         |              |
| NO <sub>x</sub>  | 5.61-11.7     | 2.19-4.00    | 8.11-14.8     | 0.10-0.15  |              |
| CO               | 0.58-3.30     | 12.1-45.0    | 1.62-6.00     | 4.71-15.9  |              |
| NMV              | 0.27-2.00     | 0.92-4.00    | 0.85-3.70     | 2.30-4.30  |              |
| PM <sub>10</sub> | 0.088-0.62    | 0.0056-0.025 | 0.47-2.08     | 0.039-0.10 |              |

**(f) Thailand**

| g/km             | CARG                 | CARD                 | LDTG                 | LDTD                 | HDTD <sup>a</sup>    |
|------------------|----------------------|----------------------|----------------------|----------------------|----------------------|
| NO <sub>x</sub>  | 0.15-2.50            | 1.52-2.77            | 0.14-3.20            | 1.80-3.15            | 9.36-11.7            |
| CO               | 2.01-15.4            | 0.25-1.07            | 4.16-28.0            | 0.65-2.00            | 2.59-3.30            |
| NMV              | 0.18-1.70            | 0.14-0.99            | 0.14-2.40            | 0.60-1.28            | 1.21-2.00            |
| PM <sub>10</sub> | 0.0018-0.0030        | 0.047-0.23           | 0.0032-0.0060        | 0.11-0.63            | 0.23-0.62            |
| g/km             | BUSG                 | BUSD                 | MC                   | CAR/LPG <sup>b</sup> | CAR/CNG <sup>b</sup> |
| NO <sub>x</sub>  | 3.28-4.00            | 12.1-14.8            | 0.080-0.15           | 2.10                 | 2.10                 |
| CO               | 36.0-45.0            | 4.80-6.00            | 3.25-15.9            | 6.05                 | 4.00                 |
| NMV              | 2.56-4.00            | 2.37-3.70            | 1.75-4.30            | 1.84                 | 0.50                 |
| PM <sub>10</sub> | 0.011-0.025          | 0.87-2.08            | 0.039-0.10           | 0.067                | 0.067                |
| g/km             | BUS/LPG <sup>b</sup> | BUS/CNG <sup>b</sup> | LDT/CNG <sup>b</sup> | HDT/CNG <sup>b</sup> |                      |
| NO <sub>x</sub>  | 5.70                 | 5.70                 | 2.10                 | 5.70                 |                      |
| CO               | 24.0                 | 12.0                 | 8.00                 | 12.0                 |                      |
| NMV              | 8.00                 | 1.40                 | 3.50                 | 1.40                 |                      |
| PM <sub>10</sub> | 0.067                | 0.067                | 0.067                | 0.067                |                      |

a. HDTG was not categorized. b. ABC Emission Inventory Manual (Shrestha et al., 2013).

**(g) Vietnam**

| g/km             | CARG      | CARD        | LDTG      | LDTD       | HDTG        |
|------------------|-----------|-------------|-----------|------------|-------------|
| NO <sub>x</sub>  | 0.55-2.50 | 1.95-2.77   | 0.43-3.20 | 2.36-3.15  | 3.48-4.00   |
| CO               | 4.31-15.4 | 0.57-1.07   | 7.94-28.0 | 0.92-2.00  | 35.4-45.0   |
| NMV              | 0.48-1.70 | 0.32-0.99   | 0.35-2.40 | 1.28       | 2.60-4.00   |
| PM <sub>10</sub> | 0.0030    | 0.083-0.23  | 0.0060    | 0.23-0.63  | 0.011-0.025 |
| g/km             | HD TD     | BUSG        | BUSD      | MC         |             |
| NO <sub>x</sub>  | 10.2-11.7 | 3.55-4.00   | 13.1-14.8 | 0.12-0.15  |             |
| CO               | 2.59-3.30 | 36.2-45.0   | 4.82-6.00 | 6.73-15.9  |             |
| NMV              | 1.30-2.00 | 2.76-4.00   | 2.56-3.70 | 2.74-4.30  |             |
| PM <sub>10</sub> | 0.27-0.62 | 0.012-0.025 | 1.03-2.08 | 0.050-0.10 |             |

**Other South Asian countries**

For Southeast Asian countries except for India, default emission factors were assumed based on Boken et al. (2007) and used as uncontrolled values. Then, emission factors during 1950-2015 were estimated considering effects of regulations. Ranges of emission factors of Southeast Asian countries are presented in Table 6.6.

**Table 6.6.** Emission factors of NO<sub>x</sub>, CO, NMVOC (NMV), and PM<sub>10</sub> for exhaust emissions from road vehicle in other South Asian countries. Unit is g/km (expressed as NO<sub>2</sub> for NO<sub>x</sub>).

**(a) Afghanistan, Bhutan, and Maldives**

| g/km <sup>a</sup> | CARG   | CARD  | LDTG   | LDTD | HDTG  |
|-------------------|--------|-------|--------|------|-------|
| NO <sub>x</sub>   | 2.20   | 1.45  | 3.20   | 4.80 | 4.00  |
| CO                | 12.2   | 1.45  | 28.0   | 1.50 | 45.0  |
| NMV               | 2.10   | 1.18  | 2.40   | 1.41 | 4.00  |
| PM <sub>10</sub>  | 0.0030 | 0.26  | 0.0060 | 0.34 | 0.025 |
| g/km <sup>a</sup> | HD TD  | BUSG  | BUSD   | MC   |       |
| NO <sub>x</sub>   | 13.6   | 4.00  | 15.3   | 0.20 |       |
| CO                | 3.60   | 45.0  | 6.10   | 15.7 |       |
| NMV               | 2.20   | 4.00  | 3.70   | 4.60 |       |
| PM <sub>10</sub>  | 0.68   | 0.025 | 2.09   | 0.10 |       |

a. Due to lack of information for regulations, default emission factors were used without changes during 1950-2015 for Afghanistan, Bhutan, and Maldives.

**(b) Bangladesh**

| g/km             | CARG <sup>a</sup> | LDTG                 | LDTD                 | HDTD <sup>a</sup>    | BUSD <sup>a</sup> |
|------------------|-------------------|----------------------|----------------------|----------------------|-------------------|
| NO <sub>x</sub>  | 0.21-2.20         | 0.21-2.20            | 3.53-4.80            | 13.0-13.6            | 14.8-15.3         |
| CO               | 1.86-12.2         | 1.86-12.2            | 0.65-1.50            | 2.86-3.60            | 4.86-6.10         |
| NMV              | 0.31-2.10         | 0.31-2.10            | 1.41                 | 1.83-2.20            | 3.16-3.70         |
| PM <sub>10</sub> | 0.0030            | 0.003                | 0.11-0.34            | 0.42-0.68            | 1.33-2.09         |
| g/km             | MC                | CAR/CNG <sup>a</sup> | LDT/CNG <sup>a</sup> | BUS/CNG <sup>a</sup> |                   |
| NO <sub>x</sub>  | 0.13-0.20         | 2.10                 | 2.10                 | 5.70                 |                   |
| CO               | 4.38-15.7         | 4.00                 | 4.00                 | 12.0                 |                   |
| NMV              | 2.51-4.60         | 0.50                 | 0.50                 | 1.40                 |                   |
| PM <sub>10</sub> | 0.025-0.10        | 0.067                | 0.067                | 0.067                |                   |

a. CARD, HDTG, and BUSG were not categorized.

**(c) Nepal**

| g/km             | CARG <sup>a</sup> | LDTG          | LDTD                 | HDTD <sup>a</sup> | BUSG        |
|------------------|-------------------|---------------|----------------------|-------------------|-------------|
| NO <sub>x</sub>  | 0.56-2.20         | 0.56-2.20     | 3.33-4.80            | 12.3-13.6         | 0.99-4.00   |
| CO               | 4.18-12.2         | 4.18-12.2     | 0.64-1.50            | 2.89-3.60         | 17.2-45.0   |
| NMV              | 0.69-2.10         | 0.69-2.10     | 1.14-1.41            | 1.72-2.20         | 1.01-4.00   |
| PM <sub>10</sub> | 0.0024-0.0030     | 0.0024-0.0030 | 0.11-0.34            | 0.38-0.68         | 0.019-0.025 |
|                  | BUSD              | MC            | BUS/LPG <sup>b</sup> |                   |             |
| NO <sub>x</sub>  | 14.2-15.3         | 0.16-0.20     | 0.20                 |                   |             |
| CO               | 5.00-6.10         | 7.21-15.7     | 3.90                 |                   |             |
| NMV              | 3.04-3.70         | 2.83-4.60     | 0.77                 |                   |             |
| PM <sub>10</sub> | 1.30-2.09         | 0.072-0.10    | 0.00                 |                   |             |

a. CARD and HDTG were not categorized. b. Malla (2014).

**(d) Pakistan**

| g/km             | CARG <sup>a</sup> | LDTG <sup>a</sup>    | HDTD <sup>a</sup> | BUSG      | BUSD      |
|------------------|-------------------|----------------------|-------------------|-----------|-----------|
| NO <sub>x</sub>  | 1.47-2.20         | 1.65-3.20            | 9.75-13.6         | 2.42-4.00 | 11.7-15.3 |
| CO               | 8.38-12.2         | 16.8-28.0            | 1.83-3.60         | 30.2-45.0 | 3.66-6.10 |
| NMV              | 1.44-2.10         | 1.26-2.40            | 1.02-2.20         | 2.44-4.00 | 2.05-3.70 |
| PM <sub>10</sub> | 0.0030            | 0.0060               | 0.25-0.68         | 0.025     | 0.96-2.09 |
| g/km             | MC                | CAR/CNG <sup>b</sup> |                   |           |           |
| NO <sub>x</sub>  | 0.18-0.20         | 2.10                 |                   |           |           |
| CO               | 11.5-15.7         | 4.00                 |                   |           |           |
| NMV              | 3.83-4.60         | 0.50                 |                   |           |           |
| PM <sub>10</sub> | 0.072-0.10        | 0.067                |                   |           |           |

a. CARD, LDTD, and HDTG were not categorized. b. ABC Emission Inventory Manual (Shrestha et al., 2013).

**(e) Sri Lanka**

| g/km             | CARG      | CARD      | LDTG      | LDTD       | HDTG  |
|------------------|-----------|-----------|-----------|------------|-------|
| NO <sub>x</sub>  | 0.65-2.20 | 1.05-1.45 | 0.57-3.20 | 3.65-4.80  | 4.00  |
| CO               | 4.23-12.2 | 0.83-1.45 | 8.97-28.0 | 0.73-1.50  | 45.0  |
| NMV              | 0.73-2.10 | 0.46-1.18 | 0.45-2.40 | 1.41       | 4.00  |
| PM <sub>10</sub> | 0.0030    | 0.11-0.26 | 0.0060    | 0.13-0.34  | 0.025 |
| g/km             | HDTD      | BUSG      | BUSD      | MC         |       |
| NO <sub>x</sub>  | 13.6      | 4.00      | 15.3      | 0.16-0.20  |       |
| CO               | 3.60      | 45.0      | 6.10      | 7.52-15.7  |       |
| NMV              | 2.20      | 4.00      | 3.70      | 3.09-4.60  |       |
| PM <sub>10</sub> | 0.68      | 0.025     | 2.09      | 0.053-0.10 |       |

**Cold start emissions**

In REASv3, cold start emissions were roughly estimated for NO<sub>x</sub>, CO, NMVOC, and PM species using the following equation:

$$E_{COLD} = \sum_i \{NV_i \times ADT_i \times EF_{HOTi} \times \beta_i(T) \times F_i(T)\}$$

where,  $E_{COLD}$  is the cold start emission,  $i$  is the vehicle type,  $NV$  is the number of vehicles in operation,  $ADT$  is the annual distance traveled,  $EF_{HOT}$  is the emission factor for the hot emission,  $\beta$  is the fraction of distance traveled driven with a cold engine or with the catalyst operating below the

light-off temperature, and  $F$  is the correction factor of  $EF_{HOT}$  for cold start emission.  $\beta$  and  $F$  are functions of temperature  $T$  and assumed based on EEA (2016) as follows:

- $\beta = 0.33182 - 0.004966 \times T$
- $F$  for gasoline vehicles
  - $1.14 - 0.006 \times T$  for  $NO_x$
  - $3.7 - 0.09 \times T$  for CO
  - $2.8 - 0.06 \times T$  for NMVOC
- $F$  for diesel vehicles
  - $1.3 - 0.013 \times T$  for  $NO_x$
  - $1.9 - 0.03 \times T$  for CO
  - $3.1 - 0.09 \times T$  for NMVOC
  - $3.1 - 0.1 \times T$  for PM species
- $F$  for LPG vehicles
  - $0.98 - 0.006 \times T$  for  $NO_x$
  - $3.66 - 0.09 \times T$  for CO
  - $2.24 - 0.06 \times T$  for NMVOC

For  $T$ , monthly averaged temperature at surface were calculated using NCEP reanalysis data provided by the NOAA/OAR/ESRL PSD, Boulder, Colorado, USA (<https://psl.noaa.gov/data/gridded/data.ncep.reanalysis.html>). Therefore, cold start emissions were estimated in each month assuming daily traffic volumes were unchanged during the target year. In addition, effects of regulations on cold start emission were not considered in REASv3.

### S6.2.2 $NH_3$

Exhaust emissions of  $NH_3$  only from gasoline vehicles were roughly estimated in REASv3. Emission factors were obtained from Kannari et al. (2001) as follows:

- 0.0221 g/km for passenger cars
- 0.0211 g/km for buses
- 0.0108 g/km for light trucks
- 0.0146 g/km for heavy trucks
- 0.0068 g/km for motorcycles

### S6.2.3 $SO_2$ and $CO_2$

For  $SO_2$  and  $CO_2$ , emissions were estimated based on fuel consumption in REASv3 except for Japan (see Sect. S6.2.4).  $SO_2$  emissions were calculated using sulfur contents in fuels in gasoline and

diesel consumed in road transport sector, assuming sulfur retention in ash is zero. Default settings of sulfur contents were taken from REASv1 and REASv2 described in Sect S3.2.1 and update with information obtained from Clean Air Asia (2011), Wang and Hao (2012), etc. The data for gasoline and diesel oil used in REASv3 are summarized in Table 6.7.

**Table 6.7.** Sulfur contents in gasoline and diesel oil for road vehicles used in REASv3.

| Countries | Settings and data sources                                                                                                                                                                                                                                                                                                                                                                                                                                                                                                                                                                                                                                                                                                                                                                                                                                                                                                                                                                                                                                                                                                                                                                                                |
|-----------|--------------------------------------------------------------------------------------------------------------------------------------------------------------------------------------------------------------------------------------------------------------------------------------------------------------------------------------------------------------------------------------------------------------------------------------------------------------------------------------------------------------------------------------------------------------------------------------------------------------------------------------------------------------------------------------------------------------------------------------------------------------------------------------------------------------------------------------------------------------------------------------------------------------------------------------------------------------------------------------------------------------------------------------------------------------------------------------------------------------------------------------------------------------------------------------------------------------------------|
| China     | <ul style="list-style-type: none"> <li>● Gasoline referring Wang and Hao (2012): <ul style="list-style-type: none"> <li>➤ Beijing: <div>0.15/0.1/0.08/0.05/0.015/0.005</div> <div>1950-1999/2000/2001-2003/2004/2005-2007/2008-2015</div> <div style="text-align: right;">in</div> </li> <li>➤ Shanghai <div>0.15/0.1/0.08/0.05/0.005</div> <div>1950-1999/2000/2001-2004/2005-2008/2009-2015</div> <div style="text-align: right;">in</div> </li> <li>➤ Guangdong <div>0.15/0.08/0.05/0.015 in 1950-1999/2000-2003/2004/2005-2015</div> </li> <li>➤ Others: <div>0.15/0.1/0.08/0.05 in 1950-1999/2000-2002/2003-2005/2006-2015</div> </li> </ul> </li> <li>● Diesel referring Clean Air Asia (2011)<sup>b</sup>: <ul style="list-style-type: none"> <li>➤ Beijing, Shanghai, and Guangdong <div>0.5/0.2/0.05/0.35/0.05</div> <div>1950-2001/2002-2003/2004/2005-2007/2008-2015</div> <div style="text-align: right;">in</div> </li> <li>➤ Hong Kong <div>0.5/0.5-0.05/0.05/0.005/0.001</div> <div>1950-1989/1990-1996/1997-2001/2002-2006/2007-2015</div> <div style="text-align: right;">in</div> </li> <li>➤ Others <div>0.5/0.2/0.125/0.35/ in 1950-2001/2002-2004/2005-2009/2010-2015</div> </li> </ul> </li> </ul> |
| India     | <ul style="list-style-type: none"> <li>● Gasoline: REASv1 and REASv2<sup>a</sup></li> <li>● Diesel: referring Clean Air Asia (2011)<sup>b</sup>: <ul style="list-style-type: none"> <li>➤ Delhi <div>1.0/0.5/0.25/0.05/0.035/0.005</div> <div>1950-1995/1996-1999/2000/2001-2004/2005-2009/2010-2015</div> <div style="text-align: right;">in</div> </li> <li>➤ Others <div>1.0/0.5/0.25/0.05/0.035</div> <div>1950-1995/1996-1999/2000/2001-2009/2010-2015</div> <div style="text-align: right;">in</div> </li> </ul> </li> </ul>                                                                                                                                                                                                                                                                                                                                                                                                                                                                                                                                                                                                                                                                                       |

|                   |                                                                                                                                                                                                                                                                                                                                |
|-------------------|--------------------------------------------------------------------------------------------------------------------------------------------------------------------------------------------------------------------------------------------------------------------------------------------------------------------------------|
| Republic of Korea | <ul style="list-style-type: none"> <li>● Gasoline: REASv1 and REASv2<sup>a</sup></li> <li>● Diesel referring Clean Air Asia (2011)<sup>b</sup>: <ul style="list-style-type: none"> <li>➤ 0.4/0.25/0.05/0.043/0.01/0.003/0.0015 in 1950-1989/1990-1994/1995-2002/2003/2004-2005/2006/2007-2015</li> </ul> </li> </ul>           |
| Taiwan            | <ul style="list-style-type: none"> <li>● Gasoline: REASv1 and REASv2<sup>a</sup></li> <li>● Diesel referring Clean Air Asia (2011)<sup>b</sup>: <ul style="list-style-type: none"> <li>➤ 0.8/0.8-0.3/0.3/0.05/0.035/0.01/0.005 in 1950-1988/1989-1996/1997-1998/1999-2001/2002-2003/2004-2007/2008-2015</li> </ul> </li> </ul> |
| Cambodia          | <ul style="list-style-type: none"> <li>● Gasoline: REASv1 and REASv2<sup>a</sup></li> <li>● Diesel: referring Clean Air Asia (2011)<sup>b</sup>: <ul style="list-style-type: none"> <li>➤ 0.8/0.8-0.2/0.2/0.15 in 1950-1989/1990-1996/1997-2003/2004-2015</li> </ul> </li> </ul>                                               |
| Indonesia         | <ul style="list-style-type: none"> <li>● Gasoline: REASv1 and REASv2<sup>a</sup></li> <li>● Diesel: referring Clean Air Asia (2011)<sup>b</sup>: <ul style="list-style-type: none"> <li>➤ 1.0/1.0-0.5/0.5/0.35/0.035 in 1950-1988/1989-1996/1997-2004/2005-2015</li> </ul> </li> </ul>                                         |
| Malaysia          | <ul style="list-style-type: none"> <li>● Gasoline: REASv1 and REASv2<sup>a</sup></li> <li>● Diesel: referring Clean Air Asia (2011)<sup>b</sup>: <ul style="list-style-type: none"> <li>➤ 0.5/0.3/0.05 in 1950-1997/1998-2001/2002-2015</li> </ul> </li> </ul>                                                                 |
| Philippines       | <ul style="list-style-type: none"> <li>● Gasoline: REASv1 and REASv2<sup>a</sup></li> <li>● Diesel: referring Clean Air Asia (2011)<sup>b</sup>: <ul style="list-style-type: none"> <li>➤ 0.5/0.2/0.05 in 1950-2000/2001-2003/2004-2015</li> </ul> </li> </ul>                                                                 |
| Singapore         | <ul style="list-style-type: none"> <li>● Gasoline: REASv1 and REASv2<sup>a</sup></li> <li>● Diesel: referring Clean Air Asia (2011)<sup>b</sup>: <ul style="list-style-type: none"> <li>➤ 0.5/0.5-0.3/0.3/0.05/0.005 in 1950-1989/1990-1996/1997/1998-2005/2006-2015</li> </ul> </li> </ul>                                    |
| Thailand          | <ul style="list-style-type: none"> <li>● Gasoline: REASv1 and REASv2<sup>a</sup></li> <li>● Diesel: referring Clean Air Asia (2011)<sup>b</sup>: <ul style="list-style-type: none"> <li>➤ 1.0/1.0-0.25/0.25/0.05/0.035/0.005 in 1950-1989/1990-1996/1997-1998/1999-2003/2004-2011/2012-2015</li> </ul> </li> </ul>             |
| Vietnam           | <ul style="list-style-type: none"> <li>● Gasoline: REASv1 and REASv2<sup>a</sup></li> <li>● Diesel: referring Clean Air Asia (2011)<sup>b</sup>: <ul style="list-style-type: none"> <li>➤ 1.0/0.05 in 1950-2006/2007-2015</li> </ul> </li> </ul>                                                                               |
| Bangladesh        | <ul style="list-style-type: none"> <li>● Gasoline: REASv1 and REASv2<sup>a</sup></li> <li>● Diesel: referring Clean Air Asia (2011)<sup>b</sup>: <ul style="list-style-type: none"> <li>➤ 1.0/1.0-0.5/0.5 in 1950-1989/1990-1996/1997-2015</li> </ul> </li> </ul>                                                              |

|           |                                                                                                                                                                                                                                                                                           |
|-----------|-------------------------------------------------------------------------------------------------------------------------------------------------------------------------------------------------------------------------------------------------------------------------------------------|
| Pakistan  | <ul style="list-style-type: none"> <li>● Gasoline: REASv1 and REASv2<sup>a</sup></li> <li>● Diesel: referring Clean Air Asia (2011)<sup>b</sup>: <ul style="list-style-type: none"> <li>➤ 1.2/1.2-1.0/1.0/0.7 in 1950-1989/1990-1996/1997-2001/2002-2015</li> </ul> </li> </ul>           |
| Sri Lanka | <ul style="list-style-type: none"> <li>● Gasoline: REASv1 and REASv2<sup>a</sup></li> <li>● Diesel: referring Clean Air Asia (2011)<sup>b</sup>: <ul style="list-style-type: none"> <li>➤ 1.0/0.5/0.175/0.05/0.005 in 1950-2002/2003/2004-2006/2007-2011/2012-2015</li> </ul> </li> </ul> |
| Others    | <ul style="list-style-type: none"> <li>● Gasoline and: diesel: REASv1 and REASv2<sup>a</sup></li> </ul>                                                                                                                                                                                   |

a. Settings of “REASv1 and REASv2” are as follows:

- Data of REASv1 and REASv2 were used in 1980-1999 and 2000-2008, respectively.
- Data in 1980 and 2008 were used before 1979 and after 2009, respectively.

b. Settings before 1995 were taken from REASv1 and after 1996 were based on Clean Air Asia (2011).

For CO<sub>2</sub>, emissions were simply calculated by consumption amounts of fuels (gasoline, diesel, liquefied petroleum gas, and natural gas) and the corresponding emission factors taken from IPCC (2006).

#### S6.2.4 Japan

Emissions of NO<sub>x</sub>, CO, NMVOC, NH<sub>3</sub>, CO<sub>2</sub>, and PM species in Japan were estimated using following data and information:

- Emission factors for different speed ranges and production years
- Regulations for vehicle emissions and their phase-in periods
- Ratios of number of vehicles of different ages
- Traffic volumes by the speed ranges

Emission factors and information of regulations were obtained from JPEC (2012a). Data of vehicle ages were taken from NILIM (2012). See Sect. 6.1.1 for other data. For SO<sub>2</sub>, emission factors after 2005 were estimated by the same methodologies for the other species and those before 2004 were adjusted based on regulation of sulfur contents in gasoline and diesel oil.

Ranges of net emission factors during 1950-2015 used in REASv3 were presented in Table 6.8 for following vehicle categories: CARG, CARD, LDTG, LDTD, MDTG, MDTD, HDTG, HDTD, BUSG, LBUSD, MBUSD, HBUSD, LSPCG, HSPCG, LSPCD, HSPCD, SMC, and MC (CAR: Passenger cars, LDT: Light duty trucks, MDT: Middle duty trucks, HDT: Heavy duty trucks, LBUS: Light buses, MBUS: Middle buses, HBUS: Heavy Buses, LSPC: Light special purpose vehicles, HSPC: Heavy special purpose vehicles, SMC: Small motorcycles, MC: Motorcycles, G: Gasoline

vehicles, and D: Diesel vehicles). Note that each vehicle category includes several sizes of vehicles especially trucks and buses. Therefore, ranges of net emission factors in Table 6.8 were caused not only by regulations, but also differences of vehicle types in each category.

**Table 6.8.** Ranges of net emission factors for Japan used in REASv3. Unit is g/km (expressed as NO<sub>2</sub> for NO<sub>x</sub>).

| g/km                           | CARG          | CARD        | LDTG          | LDTD        | MDTG         |
|--------------------------------|---------------|-------------|---------------|-------------|--------------|
| SO <sub>2</sub>                | 0.00085-0.012 | 0.0015-1.48 | 0.00097-0.032 | 0.0011-3.20 | 0.0091-0.014 |
| NO <sub>x</sub>                | 0.062-3.49    | 0.18-3.77   | 0.21-19.3     | 0.24-9.04   | 0.052-6.12   |
| CO                             | 1.13-21.3     | 0.23-1.00   | 3.09-60.5     | 0.30-3.01   | 1.13-24.9    |
| NMV                            | 0.033-2.90    | 0.017-0.19  | 0.020-6.07    | 0.020-1.47  | 0.015-2.79   |
| NH <sub>3</sub>                | 0.015-0.033   | -           | 0.018-0.090   | -           | 0.016-0.049  |
| CO <sub>2</sub>                | 130-190       | 159-249     | 128-535       | 163-411     | 140-240      |
| PM <sub>10</sub> <sup>a</sup>  | -             | 0.037-0.13  | -             | 0.0094-0.65 | -            |
| PM <sub>2.5</sub> <sup>a</sup> | -             | 0.037-0.13  | -             | 0.0094-0.65 | -            |
| BC                             | -             | 0.015-0.053 | -             | 0.0050-0.34 | -            |
| OC                             | -             | 0.012-0.041 | -             | 0.0023-0.16 | -            |
| g/km                           | MDTD          | HDTG        | HDTD          | BUSG        | LBUSD        |
| SO <sub>2</sub>                | 0.0013-3.42   | 0.0022-0.03 | 0.0040-16.6   | 0.0013-0.03 | 0.0014-2.01  |
| NO <sub>x</sub>                | 0.72-9.68     | 0.10-20.1   | 4.17-46.9     | 0.071-19.8  | 0.82-6.30    |
| CO                             | 0.23-3.11     | 3.92-52.8   | 0.48-15.1     | 2.98-54.6   | 0.29-1.85    |
| NMV                            | 0.021-1.47    | 0.028-5.23  | 0.11-7.14     | 0.039-5.45  | 0.035-1.03   |
| NH <sub>3</sub>                | -             | 0.028-0.090 | -             | 0.022-0.087 | -            |
| CO <sub>2</sub>                | 184-446       | 339-511     | 612-2127      | 197-500     | 192-266      |
| PM <sub>10</sub> <sup>a</sup>  | 0.014-0.69    | -           | 0.055-3.35    | -           | 0.022-0.44   |
| PM <sub>2.5</sub> <sup>a</sup> | 0.014-0.69    | -           | 0.055-3.35    | -           | 0.022-0.44   |
| BC                             | 0.0081-0.39   | -           | 0.031-1.89    | -           | 0.010-0.20   |
| OC                             | 0.0030-0.15   | -           | 0.011-0.70    | -           | 0.0062-0.12  |
| g/km                           | MBUSD         | HBUSD       | LSPCG         | LSPCD       | HSPCG        |
| SO <sub>2</sub>                | 0.0023-3.56   | 0.0040-7.66 | 0.00091-0.014 | 0.0014-1.34 | 0.0022-0.030 |
| NO <sub>x</sub>                | 2.02-10.1     | 4.83-21.7   | 0.042-6.07    | 0.23-2.36   | 0.10-20.0    |
| CO                             | 0.48-3.29     | 0.75-7.09   | 0.70-25.1     | 0.050-0.83  | 4.04-53.5    |
| NMV                            | 0.12-1.59     | 0.17-3.43   | 0.015-2.81    | 0.010-0.18  | 0.029-5.30   |
| NH <sub>3</sub>                | -             | -           | 0.012-0.049   | -           | 0.028-0.091  |
| CO <sub>2</sub>                | 352-456       | 619-982     | 140-241       | 159-246     | 339-512      |

|                                |             |                |                |              |   |
|--------------------------------|-------------|----------------|----------------|--------------|---|
| PM <sub>10</sub> <sup>a</sup>  | 0.056-0.72  | 0.094-1.55     | -              | 0.026-0.13   | - |
| PM <sub>2.5</sub> <sup>a</sup> | 0.056-0.72  | 0.094-1.55     | -              | 0.026-0.13   | - |
| BC                             | 0.025-0.32  | 0.041-0.68     | -              | 0.015-0.071  | - |
| OC                             | 0.015-0.20  | 0.026-0.42     | -              | 0.0020-0.010 | - |
| g/km                           | HSPCD       | SMC            | MC             |              |   |
| SO <sub>2</sub>                | 0.0014-7.42 | 0.00027-0.0025 | 0.00036-0.0056 |              |   |
| NO <sub>x</sub>                | 0.72-21.0   | 0.13-0.511     | 0.048-0.59     |              |   |
| CO                             | 0.24-6.77   | 7.01-14.9      | 17.5-24.2      |              |   |
| NMV                            | 0.022-3.22  | 0.16-2.76      | 0.13-5.85      |              |   |
| NH <sub>3</sub>                | -           | -              | -              |              |   |
| CO <sub>2</sub>                | 189-951     | 19.7-50.3      | 49.3-97.8      |              |   |
| PM <sub>10</sub> <sup>a</sup>  | 0.015-1.50  | -              | -              |              |   |
| PM <sub>2.5</sub> <sup>a</sup> | 0.015-1.50  | -              | -              |              |   |
| BC                             | 0.0083-0.85 | -              | -              |              |   |
| OC                             | 0.0011-0.11 | -              | -              |              |   |

a. It was assumed that emissions of PM species were only from diesel vehicles and ratios of PM<sub>2.5</sub>/PM<sub>10</sub> were 1.0 for all vehicle categories.

For cold start emissions, ratios of cold start and hot emissions for each vehicle type for SO<sub>2</sub>, NO<sub>x</sub>, CO, NMVOC, and PM species were estimated based on the JEI-DB (JPEC 2012a, b, c; 2014). Then, cold start emissions for each vehicle type were calculated by the hot emissions and the corresponding ratios. Note that the ratios were adopted for all target years without changes which means that effects of regulations on cold start emissions were not considered in REAS3.

### S6.3 Evaporative emissions

In REASv3, evaporative emissions from gasoline vehicles except for Japan were estimated using the following equation:

$$E_{EVP} = \sum_i \{NV_i \times EF_{EVPi}(T) \times 365\}$$

where,  $E_{EVP}$  is the evaporative emission,  $i$  is the vehicle type,  $NV$  is the number of vehicles in operation, and  $EF_{EVP}$  is the emission factor as a function of surface temperature  $T$ . Settings of  $EF_{EVP}$  g/vehicle/day were taken from EEA (2016) as follow:

- $T$ : around 20 to 30 °C
  - 14.6 for Passenger cars
  - 22.2 for Light duty vehicles

- 7.50 for Motorcycles
- T: around 10 to 20 °C
  - 7.80 for Passenger cars
  - 12.7 for Light duty vehicles
  - 4.60 for Motorcycles
- T: around 0 to 10 °C
  - 5.7 for Passenger cars
  - 9.3 for Light duty vehicles
  - 3.4 for Motorcycles
- T: less than 0 °C
  - 4.0 for Passenger cars
  - 6.5 for Light duty vehicles
  - 2.6 for Motorcycles

The same as for the cold start emissions, evaporative emissions were estimated each month based on monthly averaged temperature at surface calculated using NCEP reanalysis data provided by the NOAA/OAR/ESRL PSD, Boulder, Colorado, USA (<https://psl.noaa.gov/data/gridded/data.ncep.reanalysis.html>).

For Japan, evaporative emissions from running loss, hot soak loss and diurnal breaking loss in 2000, 2005, and 2010 were obtained for 6 sub-regions in Japan defined in Sect. S2.3 from the JEI-DB (JPEC 2012a, b, c; 2014). Data between 2000 (2005) and 2005 (2010) were interpolated and those before 2000 and after 2000 were extrapolated using the following trend factors:

- Running loss: Trends of traffic volumes of gasoline vehicles
- Diurnal breaking loss: Trends of number of gasoline vehicles
- Hot soak loss: Trends of emissions from gasoline vehicles roughly estimated by number of gasoline vehicles and corresponding emission factors obtained from JPEC (2012a).

#### **S6.4 Speciation of NMVOC emissions**

Emission factors of NMVOC described in Sects. S6.2 and S6.3 were for total NMVOC. In REASv3, total NMVOC emissions were allocated to 19 NMVOC species categories defined in Sect. S2.1. The speciation was conducted based on speciation profiles for exhaust emissions from each vehicle type and evaporative emissions provided by D. G. Streets (private communication) based on Klimont et al. (2002a) used for REASv1 and REASv2. The speciation profiles were commonly used for all countries and periods.

## S7. Other transport

### S7.1 Sub-sectors included in REASv3

In REASv3, emissions from railway, pipeline transport and non-specified sectors defined in the International Energy Agency (IEA) World Energy Balances (IEA, 2017) were included in transport sector except for road transport. Aviation and navigation are out of scope of REASv3.

### S7.2 Activity data

Activity data in other transport sectors are fuel consumption which was described in Sect. S3.1.

### S7.3 Emission factors

Table 7.1 summarized emission factors for diesel oil and heavy fuel oil combustion in railway sector. For emission factors of other sources and speciation of NMVOC species, settings for fuel combustion in industry sector were used as default. Note that emission controls were not considered emissions from other transport sectors in REASv3.

**Table 7.1.** Emission factors for diesel oil and heavy fuel oil combustion in railway. Unit is t/PJ (expressed as NO<sub>2</sub> for NO<sub>x</sub>).

|                                | Diesel oil | Heavy fuel oil |
|--------------------------------|------------|----------------|
| NO <sub>x</sub> <sup>a</sup>   | 900        | 1249           |
| CO <sup>a</sup>                | 250        | 1000           |
| NMVOC <sup>a</sup>             | 200        | 110            |
| NH <sub>3</sub> <sup>a</sup>   | 0.16       | 0.01           |
| CO <sub>2</sub> <sup>b</sup>   | 74100      | 77400          |
| PM <sub>10</sub> <sup>c</sup>  | 102        | 143            |
| PM <sub>2.5</sub> <sup>c</sup> | 96.4       | 135            |
| BC <sup>c</sup>                | 44.0       | 58.5           |
| OC <sup>c</sup>                | 25.0       | 39.0           |

a. ABC Emission Inventory Manual (Shrestha et al., 2013). b. IPCC (2006). c. Klimont et al. (2002b) and Kupiainen and Klimont (2004) for PM species.

#### **S7.4 Speciation of NMVOC emissions**

Emission factors of NMVOC described in Sect. S7.3 were for total NMVOC. In REASv3, total NMVOC emissions were allocated to 19 NMVOC species categories defined in Sect. S2.1. The speciation was conducted based on speciation profiles for exhaust emissions from each vehicle type and evaporative emissions provided by D. G. Streets (private communication) based on Klimont et al. (2002a) used for REASv1 and REASv2. The speciation profiles were commonly used for all countries and periods.

## **S8. Non-combustion sources of NH<sub>3</sub>**

### **S8.1 Manure management**

#### **S8.1.1 Methodology**

In REASv3, gridded emissions from manure management were developed based on following procedures except for Japan (see Sect. S8.1.5 for Japan):

1. Gridded emissions of REASv1 (Yamaji et al., 2004) in 2000 were used for based data.
2. Emissions in each country and region during 1950-2015 were estimated using numbers of livestock as activity data (see Sect. S8.1.2) and emission factors for each livestock (see Sect. S8.1.3).
3. Spatial allocation factors of emissions in target years were created using the base data and ratios of emission amounts in each grid between target years and 2000 obtained from the Emission Database for Global Atmospheric Research (EDGAR) version 4.3.2 during 1970-2012 (Crippa et al., 2016). Before 1970 and 2012, data in 1970 and 2012 were used, respectively.
4. Annual gridded emissions data in each country and region during 1950-2015 were developed using the base data described in No.1, ratios of emissions between target years and the base year based on the trends of emissions estimated in No.2, and the spatial allocation factors for each country and region in target years developed in No.3. Note that emission values estimated in No.2 were not directly used in REASv3.
5. Monthly gridded data during 1950-2015 were created using the annual gridded emission data developed in No.4 and monthly allocation factors for each country and region (see Sect. S8.1.4).

Note that in REASv3, emissions from animal manures utilized for fertilizers are not included in manure management, but in fertilizer application (see Sect. S8.2).

#### **S8.1.2 Activity data**

As described in Sect. S8.1.1, activity data to estimate NH<sub>3</sub> emissions from manure management of livestock are number of livestock. In REASv3, contributions from following livestock were included: buffalo, dairy cows, other cattle, swine, goats, sheep, horses, camels, mules and asses, broilers, ducks, geese, laying hens, and turkeys. National data were derived from FAOSTAT (<http://www.fao.org/faostat/en/>) during 1961-2015 and extrapolated to 1950 using Mitchell (1998). For China, weighting factors for regional distribution were calculated during 1987-2015 based on China Statistical Yearbook (National Bureau of Statistics of China, 1986–2016). The weighting

factors in 1987 were used for the data before 1986. For regional weighting factors for India, data during 1997-2012 were estimated based on Livestock Census (<http://www.dahd.nic.in/about-us/divisions/statistics/>) and the weighting factors in 1997 and 2012 were used before 1997 and 2012, respectively.

### **S8.1.3 Emission factors**

Annual emission factors of manure management were taken from EEA (2016) for emissions from housing, storage and yards for all countries and regions except for China. For China, regional monthly emission factors were estimated based on those for manure spreading from Xu et al. (2016) and ratios of emission factors between manure management and manure applied to soils from EEA (2016). The emission factors were commonly used for all target years.

### **S8.1.4 Monthly allocation factors**

For China, as described in Sect. S8.1.3, monthly emission factors were estimated. For other countries and regions, monthly allocation factors were calculated based on relationships between monthly weighting factors of Japan from the Japan Auto-Oil Program (JATOP) Emission Inventory-Data Base (JEI-DB) (JPEC, 2012b; 2014) and monthly averaged temperature.

### **S8.1.5 Japan**

In REASv3, gridded emissions from manure management were developed based on following procedures:

1. Monthly gridded emissions of JEI-DB (JPEC, 2012b; 2014) in 2000 were used as base data before 2002 and those in 2005 were used after 2003.
2. Emissions in 47 prefectures during 1950-2015 were estimated using numbers of livestock as activity data and corresponding emission factors for each livestock.
3. Monthly gridded emissions data in each prefecture during 1950-2015 were developed using the base data described in No.1, ratios of emissions between target years and the base year based on the trends of emissions estimated in No.2. Note that emission values estimated in No.2 were not directly used in REASv3.
4. Monthly gridded data during 1950-2015 were created by adding data of each prefecture developed in No.3.

For Japan, contributions from following livestock were included: dairy cows, other cattle, fattening pigs, other hogs, sheep, goats, broilers, and layers. Data of each prefecture during

1960-2015 were obtained from the statistics of Ministry of Agriculture, Forestry and Fisheries (<https://www.maff.go.jp/j/tokei/kouhyou/tikusan/>) and extrapolated using Historical Statistics of Japan (Japan Statistical Association, 2006). Emission factors were taken from EEA (2016) for housing, storage and yards the same as for other countries and regions.

## **S8.2 Fertilizer application**

### **S8.2.1 Methodology**

In REASv3, gridded emissions from fertilizer were developed based on following procedures except for Japan (see Sect. S8.2.5 for Japan):

1. Gridded emissions of REASv1 (Yan et al., 2003) in 2000 were used for based data.
2. Emissions from both synthetic fertilizer and animal manure used as fertilizer in each country and region during 1950-2015 were estimated. Those from synthetic fertilizer were calculated using amounts of applied synthetic fertilizer (see Sect. S8.2.2) and emission factors for each fertilizer type (see Sect. S8.2.3) and those from animal manure were estimated based on number of livestock (see Sect. S8.1.2) and emission factors for each livestock (see S8.2.3).
3. Spatial allocation factors of emissions in target years were created using the base data and ratios of amounts of synthetic nitrogen fertilizer applied to each grid between target years and 2000 obtained from Nishina et al. (2017) during 1961-2010. Before 1961 and 2010, data in 1961 and 2010 were used, respectively.
4. Annual gridded emissions data in each country and region during 1950-2015 were developed using the base data described in No.1, ratios of emissions between target years and the base year based on the trends of emissions estimated in No.2, and the spatial allocation factors for each country and region in target years developed in No.3. Note that emission values estimated in No.2 were not directly used in REASv3.
5. Monthly gridded data during 1950-2015 were created using the annual gridded emission data developed in No.4 and monthly allocation factors for each country and region (see Sect. S8.2.4).

### **S8.2.2 Activity data**

#### **Synthetic fertilizer**

As described in Sect. S8.2.1, activity data to estimate NH<sub>3</sub> emissions from synthetic fertilizer are applied amounts of synthetic fertilizer. In REASv3, contributions from following synthetic

fertilizer were included: ammonium nitrate, ammonium phosphate, ammonium sulphate, ammonium sulphate nitrate, ammonium bicarbonate, calcium ammonium nitrate, calcium nitrate, sodium nitrate, urea, other nitrogen fertilizer, and other complex fertilizer.

For China, national data of different fertilizers were taken from FAOSTAT (<http://www.fao.org/faostat/en/>) and Fu et al. (2017) during 1982-2015. The data were extrapolated to 1950 and regionally distributed based on total consumption of chemical fertilizer obtained from China Data Online. For India, national data for each fertilizer type were taken from FAOSTAT during 1982-2015 and regionally distributed using state-wise consumption of nitrogen fertilizers obtained from Indiastat. The data were extrapolated to 1961 using national consumption data of total nitrogen fertilizer in India from FAOSTAT and to 1950 based on global nitrogen fertilizer consumption from Hammond and Matthews (1999). Using the same procedures for India, national data of other countries and regions for each fertilizer type were derived from FAOSTAT and were extrapolated based on national and global nitrogen fertilizer consumption data.

#### **Animal manure**

Activity data for emissions from animal manure used as fertilizer are numbers of livestock and the same data for manure management described in Sect. S8.1.2 were used.

#### **S8.2.3 Emission factors**

##### **Synthetic fertilizer**

Annual emission factors of ammonium nitrate, ammonium phosphate, ammonium sulphate, calcium ammonium nitrate, and urea were based on EEA (2016). In REASv3, data for normal pH and temperate climate were adopted. For ammonium bicarbonate, emission factor was obtained from Yan et al. (2003). For other fertilizers including ammonium sulphate nitrate, calcium nitrate, sodium nitrate, other nitrogen fertilizer, and other complex fertilizer, data of other straight N compounds in EEA (2016) were used. The emission factors were commonly used for all target years.

##### **Animal manure**

Annual emission factors of from animal manure used as fertilizer were taken from EEA (2016) for emissions from following manure application for all countries and regions except for China. For China, regional monthly emission factors were taken from Xu et al. (2016). The emission factors were commonly used for all target years.

## **S8.2.4 Monthly allocation factors**

### **Synthetic fertilizer**

For China, monthly allocation factors in REASv3 were estimated based on monthly application nitrogen ratio taken from Xu et al. (2015). The data were used commonly for each grid in China during 1950-2015. For other countries and regions, first, monthly allocation factors were calculated using N fertilizer application amounts for each country and region obtained from Nishina et al. (2017) during 1961-2010. In the calculated monthly factors, there are cases that some months have high factors, whereas the others have almost zero. In REASv3, the highest monthly factor was set at 0.2 and the factors of all months were adjusted accordingly referring to Janssens-Maenhout et al. (2015). The modified monthly factors during 1961-2010 were commonly used for each country and region and data in 1961 and 2010 were used before 1960 and 2011, respectively.

### **Animal manure**

For China, as described in Sect. S8.2.3, monthly emission factors were estimated. For other countries and regions, monthly allocation factors were calculated based on relationships between monthly weighting factors of Japan from JEI-DB (JPEC, 2012b; 2014) and monthly averaged temperature.

## **S8.2.5 Japan**

In REASv3, gridded emissions from fertilizer application were developed based on following procedures:

1. Monthly gridded emissions of JEI-DB (JPEC, 2012b; 2014) in 2000 were used as base data before 2002 and those in 2005 were used after 2003.
2. Emissions from both synthetic fertilizer and animal manure used as fertilizer in 47 prefectures during 1950-2015 were estimated. Those from synthetic fertilizer were calculated using amounts of applied synthetic fertilizer and emission factors for each fertilizer type and those from animal manure were estimated based on number of livestock and emission factors for each livestock.
3. Monthly gridded emissions data in each prefecture during 1950-2015 were developed using the base data described in No.1, ratios of emissions between target years and the base year based on the trends of emissions estimated in No.2. Note that emission values estimated in No.2 were not directly used in REASv3.

4. Monthly gridded data during 1950-2015 were created by adding data of each prefecture developed in No.3.

### **Synthetic fertilizer**

Activity data for emissions from synthetic fertilizer were applied amounts of synthetic fertilizers. National data of different fertilizers were derived from FAOSTAT during 1971-2002 and extrapolated during 1960-2015 and distributed to 47 prefectures based on data in Fertilizer Statistics Yearbook (Newspaper department of Japan Fertilizer Association), Handbook of Fertilizer (Association of Agriculture and Forestry Statistics) and statistics provided by Japan Fertilizer & Ammonia Producers Association (<http://www.jaf.gr.jp/en.html>). The data were extrapolated to 1950 based on global nitrogen fertilizer consumption from Hammond and Matthews (1999).

### **Animal manure**

Activity data for emissions from animal manure used as fertilizer are numbers of livestock and the same data for manure management described in Sect. S8.1.5 were used. Emission factors were taken from EEA (2016) for manure applied to soils the same as for other countries and regions. The emission factors were commonly used for all target years.

## **S8.3 Industrial production**

In REASv3, NH<sub>3</sub> emissions from industrial processes for production of ammonia, ammonium nitrate, and urea (fertilizers) are considered. National production amounts of ammonia during 1990-2015 were obtained from Minerals Yearbook (USGS). For China, data before 1990 were taken from Vroomen (2013). Data of Japan before 1990 were derived from the Historical Statistics of Japan (Japan Statistical Association, 2006). For other countries, data were extrapolated based on trends of production capacity obtained from World Nitrogen Survey (Constant and Sheldrick, 1992). For urea and ammonium nitrate, data of Japan were derived from Handbook of Fertilizer (Association of Agriculture and Forestry Statistics). For China, national production amounts of urea obtained taken from Vroomen (2013). Other national data of urea and ammonium nitrate were estimated from IFASTAT (<https://www.ifastat.org/>) and World Nitrogen Survey (Constant and Sheldrick, 1992). For regional distribution of Japan, weighting factors were developed using regional shipment data for chemical industrial products obtained from Ministry of Economy, Trade and Industry (<https://www.meti.go.jp/statistics/tyo/kougyo/index.html>). For China, regional production ratios of urea in 2015 were used as weighting factors. For India, national data were distributed to

each region using total energy consumption in chemical industry developed based on methodologies described in Sect. S3.1.

Emission factors for industrial process emissions from production of ammonia, and urea were derived from Shrestha et al. (2013). For ammonium nitrate, median of the range provided in Shrestha et al. (2013) were used. The emission factors were adopted for all target countries and periods.

#### **S8.4 Human**

NH<sub>3</sub> emissions from human perspiration and respiration were included in REASv3. Activity data are number of total population in each country and region. See descriptions for domestic use of solvents in Sect. S5.1.2 for data sources of total population. Emission factors were taken from Kannari et al. (2001) and adopted for all target countries and periods.

#### **S8.5 Latrines**

In REASv3, emissions from latrines were estimated based on number of population in no sewage service areas. For Japan, data were obtained from Mizuochi (2012) and MOEJ (Ministry of Environment of Japan) (2017b). Due to lack of information, corresponding data in other countries and regions were roughly estimated based on the following assumptions referring Kanamori and Hijioka (2013):

- Rep. of Korea, Taiwan, Singapore, Hong Kong, and Macau: ratios of population in sewage service areas were 95 percent of Japan
- Beijing and Shanghai: ratios of population in sewage service areas were 60 percent of Japan
- Other countries and regions: ratios of population in sewage service areas were one-third of Japan

Emission factor for latrines was taken from Vallack and Rypdal (2012) which was half value provided in EEA (2016) and adopted for all target countries and periods.

## **S9. Spatial and temporal distribution**

### **S9.1 Grid allocation factors**

#### **S9.1.1 Population distribution**

In REASv3, spatial distributions of total population were used as default grid allocation factors. In addition, urban and rural population distributions were also used for spatial allocation factors for several sectors (see Sects. S9.1.2, S9.1.3, S9.1.4, and S9.1.6). HYDE 3.2.1 (Klein Goldwijk et al. 2017) provides total, urban, and rural population data with  $5' \times 5'$  in 1950, 1960, 1970, 1980, 1990, 2000, 2005, 2010, and 2015. REASv3 used the total, urban, and rural population data of HYDE 3.2.1 as weighting factors to create grid allocation factors for  $0.25^\circ \times 0.25^\circ$  data. The data of missing years were created by interpolation.

#### **S9.1.2 Power plants**

As described in Sects. S2.5 and S3.1.6, REASv3 treats large power plants as point sources and information of longitude and latitude were provided with emissions from each power plant. The locations of power plants were surveyed using internet services such as Industry About (<https://www.industryabout.com/>), Global Energy Observatory (<http://globalenergyobservatory.org/>), and search engines based on names of units, plants, and companies derived from the World Electric Power Plants Database (WEPP) (Platts, 2018). Emissions from area sources were distributed to grid cells using based on total population distribution. For Japan, emissions from area sources were gridded using grid allocation factors for other industries (see Sect. S9.1.7).

#### **S9.1.3 Iron and steel industry**

In REASv3, iron and steel plants were not treated as point sources, but grid allocation factors for iron and steel industry were developed as follows:

1. Major iron and steel plants including names, production capacities, and start years of operations were surveyed using Minerals Yearbook (USGS), websites of iron and steel plants, and internet search engines. For plants without information of production capacity and start years of operations, small values were assumed for production capacities by referring to other plants in each country and region and the data were used for all target years to estimate grid allocation factors.
2. Locations of the surveyed plants were searched using internet services such as Industry About

(<https://www.industryabout.com/>), websites of iron and steel plants, and Google Map.

3. Grid allocation factors were created for each target year based on longitude and latitude and production capacity of each plant in operation used as weighting factors.

One problem of these grid allocation factors is that not all emissions in iron and steel industry sector were from plants considered in above procedures. In REASv3, 80% of both combustion and non-combustion emissions from iron and steel industry were allocated to grid cells using the grid allocation factors developed here. For the other 20%, emissions were distributed to grid cells based on total population distribution except for Japan where grid allocation factors for other industries (see Sect. S9.1.7) were used.

#### **S9.1.4 Cement industry**

The same as for iron and steel plants, in REASv3, cement plants were not treated as point sources, but grid allocation factors for iron and steel industry were developed as follows:

4. Major cement plants including names, production capacities, and start years of operations were surveyed using Minerals Yearbook (USGS), websites of cement plants, and internet search engines. For plants without information of production capacity and start years of operations, small values were assumed for production capacities by referring to other plants in each country and region and the data were used for all target years to estimate grid allocation factors.
5. Locations of the surveyed plants were searched using internet services such as Industry About (<https://www.industryabout.com/>), websites of cement plants and Google Map.
6. Grid allocation factors were created for each target year based on longitude and latitude and production capacity of each plant in operation used as weighting factors.

Also, the same as for the case of iron and steel plants, one problem of these grid allocation factors is that not all emissions in cement industry sector were from plants considered in above procedures. In REASv3, 80% of both combustion and non-combustion emissions from cement industry were allocated to grid cells using the grid allocation factors developed here. For the other 10%, emissions were distributed to grid cells based on total population distribution except for Japan where grid allocation factors for other industries (see Sect. S9.1.7) were used.

#### **S9.1.5 Road transport**

Grid allocation factors for road transport sector were created from other emission inventory datasets. For Japan, gridded emission data of the Japan Auto-Oil Program (JATOP) Emission Inventory-Data Base (JEI-DB) (JPEC 2012a, c; 2014) 2000, 2005, and 2010 were used to create grid allocation factors for each target species. For the year between 2000 and 2005/2005 and 2010, the

JEI-DB data were interpolated. Before 2000 and after 2010, the JEI-DB data for 2000 and 2010 were used, respectively. For other countries and regions, grid allocation factors for each species were created using gridded emission data of road transport sector of the Emission Database for Global Atmospheric Research (EDGAR) version 4.3.2 (Crippa et al., 2016) during 1970-2012. Before 1970 and after 2012, data for 1970 and 2012 were used, respectively.

#### **S9.1.6 Domestic sectors**

##### **Residential fuel combustion**

For China, emissions from residential fuel combustion were estimated in urban and rural areas separately. They were distributed to grid cells based on rural and total population distribution, respectively. For other countries and regions, emissions from fuel combustion were estimated for total residential sector. For emissions from coal fuels, kerosene, and biofuels combustion, grid allocation factors developed using rural population distribution were used. For other fuels, emissions were distributed to grid cells based on total population distribution.

##### **Commercial and public services (fuel combustion)**

Emissions were distributed to grid cells based on urban population distribution.

##### **Agriculture and forestry (fuel combustion)**

Emissions were distributed to grid cells based on rural population distribution.

##### **NMVOC non-combustion emissions related to residential activities**

Emissions from dry cleaning and waste disposal were distributed to grid cells based on urban and rural population distributions, respectively. For those from domestic use of solvents and paint, grid allocation factors developed using total population distribution were used.

##### **NH<sub>3</sub> emissions related to human biological phenomenon**

Emissions from human perspiration and respiration were distributed to grid cells based on total population distribution and those from latrines were gridded using grid allocation factors developed using rural population distribution.

### S9.1.7 Others

For all other sources which were not included in descriptions in Sects. S9.1.2-6, emissions were allocated to grid cells based on total population distribution except for Japan. Grid allocation factors for the other sources of Japan were summarized in Table 9.1.

**Table 9.1.** Data sources and treatments for grid allocation factors for Japan for sources not described in Sects. S9.1.2-S9.1.6.

| Sector categories          | Data sources and treatment                                                                                                                                                                                                                                                                                                                                                                                                                                                                                                                                                                                                                                                                                                                                                                                                                                                                                                                                                                                                                                                                                                                                                                                    |
|----------------------------|---------------------------------------------------------------------------------------------------------------------------------------------------------------------------------------------------------------------------------------------------------------------------------------------------------------------------------------------------------------------------------------------------------------------------------------------------------------------------------------------------------------------------------------------------------------------------------------------------------------------------------------------------------------------------------------------------------------------------------------------------------------------------------------------------------------------------------------------------------------------------------------------------------------------------------------------------------------------------------------------------------------------------------------------------------------------------------------------------------------------------------------------------------------------------------------------------------------|
| Non-ferrous metal industry | <ul style="list-style-type: none"> <li>● Longitude and latitude, start years of operations, and production capacities of copper, zinc, lead, and aluminium plants surveyed using Minerals Yearbook (USGS), websites of non-ferrous metal plants, and internet search engines.</li> <li>● Using the same methodology for iron and steel industry described in Sect. S9.1.3, grid allocation factors were developed for copper, zinc, lead, aluminium, and total non-ferrous metal sectors independently. Data for total non-ferrous metal sector include points of all non-ferrous metal plants.</li> <li>● Emissions from non-combustion sources were estimated for each metal sector and corresponding grid allocation factors were used. For combustion sources, grid allocation factors for total non-ferrous metal sector were used.</li> <li>● Similar to the methodology for iron and steel, 80% of emissions from non-ferrous metal industry sectors were allocated to grid cells using the grid allocation factors developed here. For the other 20%, emissions were distributed to grid cells based on grid allocation factors for other industries (see “Other industry” of this table).</li> </ul> |
| Other industry             | <ul style="list-style-type: none"> <li>● Grid allocation factors for each target species were created based on gridded emission data of JEI-DB (JPEC 2012b, c; 2014) in 2000, 2005 and 2010 for industry sector where contributions from grids including point sources of iron and steel, cement, and non-ferrous metals were excluded. For the year between 2000 and 2005/2005 and 2010, the data were interpolated. Before 1999 and after 2011, the data for 2000 and 2010 were used, respectively.</li> </ul>                                                                                                                                                                                                                                                                                                                                                                                                                                                                                                                                                                                                                                                                                              |
| NMVOC evaporative sources  | <ul style="list-style-type: none"> <li>● Grid allocation factors were created based on gridded emission data of JEI-DB (JPEC 2012b, c; 2014) for NMVOC evaporative sources</li> </ul>                                                                                                                                                                                                                                                                                                                                                                                                                                                                                                                                                                                                                                                                                                                                                                                                                                                                                                                                                                                                                         |

|  |                                                                                 |
|--|---------------------------------------------------------------------------------|
|  | using the same methodology for road transport sector described in Sect. S9.1.5. |
|--|---------------------------------------------------------------------------------|

## S9.2 Monthly variation factors

### S9.2.1 Power plants

Data sources and treatment for monthly variation factors used in REASv3 were summarized in Table 9.2.

**Table 9.2.** Data sources and treatments for monthly variation factors for emissions from power plants used in REASv3.

| Countries and regions | Data sources and treatment                                                                                                                                                                                                                                                                                                                                                                                                                                                                                                                                                                                                                      |
|-----------------------|-------------------------------------------------------------------------------------------------------------------------------------------------------------------------------------------------------------------------------------------------------------------------------------------------------------------------------------------------------------------------------------------------------------------------------------------------------------------------------------------------------------------------------------------------------------------------------------------------------------------------------------------------|
| China                 | <ul style="list-style-type: none"> <li>● Weighting factors: Monthly generated electricity</li> <li>● Data sources and treatment: <ul style="list-style-type: none"> <li>➢ Regional data during 2002-2010 were obtained from China Data Online. Before 2001 and after 2011, the data in 2002 and 2011 were used, respectively.</li> <li>➢ Estimated monthly variation factors were used for all fuel types.</li> </ul> </li> </ul>                                                                                                                                                                                                               |
| India                 | <ul style="list-style-type: none"> <li>● Weighting factors: Monthly thermal generation of electricity</li> <li>● Data sources and treatment: <ul style="list-style-type: none"> <li>➢ National data during in 2000, 2005, 2010 were taken from Monthly Abstract of Statistics (Ministry of Statistics and Programme Implementation, <a href="http://mospi.gov.in/">http://mospi.gov.in/</a>). Data during 2001-2004/2006-2009 were interpolated. Before 1999 and after 2011, the data in 2000 and 2010 were used, respectively.</li> <li>➢ Estimated monthly variation factors were used for all fuel types and regions.</li> </ul> </li> </ul> |
| Japan                 | <ul style="list-style-type: none"> <li>● Monthly variation factors were derived from a report of JEI-DB (2014) and used for all fuel types, regions, and periods.</li> </ul>                                                                                                                                                                                                                                                                                                                                                                                                                                                                    |
| Taiwan                | <ul style="list-style-type: none"> <li>● Weighting factors: Monthly generated electricity</li> <li>● Data sources and treatment: <ul style="list-style-type: none"> <li>➢ National data in 2011 were taken from Monthly Bulletin of Statistics (National Statistics, <a href="https://eng.stat.gov.tw/">https://eng.stat.gov.tw/</a>).</li> <li>➢ Estimated monthly variation factors were used for all fuel types and periods.</li> </ul> </li> </ul>                                                                                                                                                                                          |

|          |                                                                                                                                                                                                                                                                                                                                                                                                                                                                                                                                                  |
|----------|--------------------------------------------------------------------------------------------------------------------------------------------------------------------------------------------------------------------------------------------------------------------------------------------------------------------------------------------------------------------------------------------------------------------------------------------------------------------------------------------------------------------------------------------------|
| Thailand | <ul style="list-style-type: none"> <li>● Monthly variation factors were derived from Thao Pham et al. (2008) and used for all fuel types, regions, and periods.</li> </ul>                                                                                                                                                                                                                                                                                                                                                                       |
| Vietnam  | <ul style="list-style-type: none"> <li>● Weighting factors: Monthly generated electricity</li> <li>● Data sources and treatment: <ul style="list-style-type: none"> <li>➢ National data during 2005-2010 were taken from monthly statistics provided by General Statistics Office of Vietnam (<a href="https://www.gso.gov.vn/">https://www.gso.gov.vn/</a>). Before 2004 and after 2011, the data in 2005 and 2010 were used, respectively.</li> <li>➢ Estimated monthly variation factors were used for all fuel types.</li> </ul> </li> </ul> |

### S9.2.2 Industry

Data sources and treatment for monthly variation factors used in REASv3 were summarized in Table 9.3. Note that emissions from industry sub-categories not described in Table 9.3 were distributed to each month using number of dates as weighting factors.

**Table 9.3.** Data sources and treatments for monthly variation factors for emissions from power plants used in REASv3.

| Countries and regions | Data sources and treatment                                                                                                                                                                                                                                                                                                                                                                                                                                                                                                                                                                                                                                                                                                                                                                                                                                                                                                                                                                                                                                                                                                                    |
|-----------------------|-----------------------------------------------------------------------------------------------------------------------------------------------------------------------------------------------------------------------------------------------------------------------------------------------------------------------------------------------------------------------------------------------------------------------------------------------------------------------------------------------------------------------------------------------------------------------------------------------------------------------------------------------------------------------------------------------------------------------------------------------------------------------------------------------------------------------------------------------------------------------------------------------------------------------------------------------------------------------------------------------------------------------------------------------------------------------------------------------------------------------------------------------|
| China                 | <ul style="list-style-type: none"> <li>● Weighting factors: Monthly production</li> <li>● Data sources and treatment: <ul style="list-style-type: none"> <li>➢ Regional data of steel and cement during 2002-2010 were derived from China Data Online. Before 2001 and after 2011, the data in 2002 and 2011 were used, respectively. Monthly variations based on steel (cement) production were adopted to both combustion and non-combustion emissions from iron and steel (cement) industry.</li> <li>➢ National data of coke and sulphuric acid production during 2006-2010 were derived from China Data Online. Before 2005 and after 2011, the data in 2006 and 2010 were used, respectively. The monthly variations based on coke production were adopted to both combustion and non-combustion emissions from coke industry and those for sulphuric acid were used only for non-combustion emissions.</li> <li>➢ National data of copper, zinc, lead, and aluminum in 2001 and 2002 were obtained from JOGMEC (2002-2003). Before 2000 and after 2003, data in 2001 and 2002 were used. The monthly variations</li> </ul> </li> </ul> |

|       |                                                                                                                                                                                                                                                                                                                                                                                                                                                                                                                                                                                                                                                                                                                                                                                                                                                                                                                                                                                                                                                                                                                                                                                                                                                                                                                                                                                                                                                                |
|-------|----------------------------------------------------------------------------------------------------------------------------------------------------------------------------------------------------------------------------------------------------------------------------------------------------------------------------------------------------------------------------------------------------------------------------------------------------------------------------------------------------------------------------------------------------------------------------------------------------------------------------------------------------------------------------------------------------------------------------------------------------------------------------------------------------------------------------------------------------------------------------------------------------------------------------------------------------------------------------------------------------------------------------------------------------------------------------------------------------------------------------------------------------------------------------------------------------------------------------------------------------------------------------------------------------------------------------------------------------------------------------------------------------------------------------------------------------------------|
|       | <p>based on production of each metal type were adopted to non-combustion emissions from each metal industry. Those for combustion in non-ferrous metal industry were estimated using production amounts of total non-ferrous metals.</p> <ul style="list-style-type: none"> <li>➤ For petroleum refinery, monthly variations were calculated based on national monthly processed volume of crude oil derived from China Data Online during 2006-2010. Before 2005 and after 2011, the data in 2006 and 2010 were used, respectively. The monthly variations were adopted to both combustion and non-combustion emissions from petroleum refinery industry including energy sector.</li> <li>➤ For other industries, monthly variations were calculated using numbers of each month as weighting factors.</li> <li>➤ Estimated monthly variation factors were used for all fuel types</li> </ul>                                                                                                                                                                                                                                                                                                                                                                                                                                                                                                                                                                |
| India | <ul style="list-style-type: none"> <li>● Weighting factors: Monthly production</li> <li>● Data sources and treatment: <ul style="list-style-type: none"> <li>➤ National data during in 2000, 2005, 2010 were taken from Monthly Abstract of Statistics (Ministry of Statistics and Programme Implementation, <a href="http://mospi.gov.in/">http://mospi.gov.in/</a>). Data during 2001-2004/2006-2009 were interpolated. Before 1999 and after 2011, the data in 2000 and 2010 were used, respectively. Following monthly variations were estimated. <ul style="list-style-type: none"> <li>✧ Pig iron: Non-combustion emissions from pig iron production</li> <li>✧ Steel products: Non-combustion emissions from steel production</li> <li>✧ Total production amounts of iron and steel: Combustion emissions from iron and steel industry</li> <li>✧ Total production amounts of non-ferrous metals: Combustion and non-combustion emissions from non-ferrous metal industry</li> <li>✧ Cement: Combustion and non-combustion emissions from cement industry</li> <li>✧ Non-metallic mineral products (index numbers of industrial production): Combustion and non-combustion emissions from non-metallic minerals industry except for cement and brick.</li> <li>✧ Sulphuric acid: Non-combustion emissions from sulphuric acid production</li> <li>✧ Coke: Combustion and non-combustion emissions from coke industry</li> </ul> </li> </ul> </li> </ul> |

|                   |                                                                                                                                                                                                                                                                                                                                                                                                                                                                                                                                                                                                                                                                                                                                                                                                                                                                                                                                                                                  |
|-------------------|----------------------------------------------------------------------------------------------------------------------------------------------------------------------------------------------------------------------------------------------------------------------------------------------------------------------------------------------------------------------------------------------------------------------------------------------------------------------------------------------------------------------------------------------------------------------------------------------------------------------------------------------------------------------------------------------------------------------------------------------------------------------------------------------------------------------------------------------------------------------------------------------------------------------------------------------------------------------------------|
|                   | <ul style="list-style-type: none"> <li>✧ Total production amounts of refined petroleum: Combustion and non-combustion emissions from petroleum refinery including energy sector.</li> <li>➤ Emissions from brick production were allocated to November to June referring Maithel (2013).</li> <li>➤ Estimated monthly variation factors were used for all fuel types.</li> </ul>                                                                                                                                                                                                                                                                                                                                                                                                                                                                                                                                                                                                 |
| Japan             | <ul style="list-style-type: none"> <li>● Monthly variation factors were derived from a report of JEI-DB (JPEC, 2014) and adopted as follows: <ul style="list-style-type: none"> <li>➤ Iron and steel industry: Combustion and non-combustion emissions from iron and steel industry</li> <li>➤ Construction: Combustion emissions from construction industry.</li> <li>➤ Petroleum refinery: Combustion and non-combustion emissions from petroleum refinery including energy sector.</li> <li>➤ Gas works: Combustion emissions from manufacture of gaseous fuels including energy sector</li> <li>➤ Other industry sectors: Settings of monthly variations for other industries in JPEC (2014) are relatively close and in REASv3, their averaged values were adopted to combustion and non-combustion emissions from other industries not included above.</li> </ul> </li> <li>● Estimated monthly variation factors were used for all fuel types and periods.</li> </ul>     |
| Republic of Korea | <ul style="list-style-type: none"> <li>● Weighting factors: Monthly production</li> <li>● Data sources and treatment: <ul style="list-style-type: none"> <li>➤ Pig iron: and crude steel: National data during 2000-2010 were taken from Steel Statistical Yearbook (<a href="https://www.worldsteel.org/steel-by-topic/statistics/steel-statistical-yearbook.html">https://www.worldsteel.org/steel-by-topic/statistics/steel-statistical-yearbook.html</a>). Monthly production amounts of pig iron (crude steel) were used to calculate monthly variations for non-combustion emissions from pig iron (crude steel) production. Monthly variations for combustion emissions from iron and steel industry were estimated based on total production amounts of pig iron and crude steel. Before 1999 and 2011, monthly variations in 2000 and 2010 were used, respectively.</li> <li>➤ Estimated monthly variation factors were used for all fuel types.</li> </ul> </li> </ul> |
| Taiwan            | <ul style="list-style-type: none"> <li>● Weighting factors: Monthly production</li> <li>● Data sources and treatment:</li> </ul>                                                                                                                                                                                                                                                                                                                                                                                                                                                                                                                                                                                                                                                                                                                                                                                                                                                 |

|             |                                                                                                                                                                                                                                                                                                                                                                                                                                                                                                                                                                                                                                                                                                                                                                                                                                                                                                                                                                                                                                                                                                   |
|-------------|---------------------------------------------------------------------------------------------------------------------------------------------------------------------------------------------------------------------------------------------------------------------------------------------------------------------------------------------------------------------------------------------------------------------------------------------------------------------------------------------------------------------------------------------------------------------------------------------------------------------------------------------------------------------------------------------------------------------------------------------------------------------------------------------------------------------------------------------------------------------------------------------------------------------------------------------------------------------------------------------------------------------------------------------------------------------------------------------------|
|             | <ul style="list-style-type: none"> <li>➤ Cement: National data in 2011 were taken from Monthly Bulletin of Statistics (National Statistics, <a href="https://eng.stat.gov.tw/">https://eng.stat.gov.tw/</a>). Estimated monthly variation factors were used for all fuel types and periods.</li> <li>➤ Pig iron: and crude steel: National data during 2000-2010 were taken from Steel Statistical Yearbook (<a href="https://www.worldsteel.org/steel-by-topic/statistics/steel-statistical-yearbook.html">https://www.worldsteel.org/steel-by-topic/statistics/steel-statistical-yearbook.html</a>). Monthly production amounts of pig iron (crude steel) were used to calculate monthly variations for non-combustion emissions from pig iron (crude steel) production. Monthly variations for combustion emissions from iron and steel industry were estimated based on total production amounts of pig iron and crude steel. Before 1999 and 2011, monthly variations in 2000 and 2010 were used, respectively. Estimated monthly variation factors were used for all fuel types.</li> </ul> |
| Brunei      | <ul style="list-style-type: none"> <li>● Monthly variations for NMVOC emissions from crude oil production were estimated based on monthly crude oil production during 2000 and 2005 taken from Brunei Economic Bulletin. Before 1999 and 2006, monthly variations in 2000 and 2005 were used.</li> </ul>                                                                                                                                                                                                                                                                                                                                                                                                                                                                                                                                                                                                                                                                                                                                                                                          |
| Indonesia   | <ul style="list-style-type: none"> <li>● Combustion and non-combustion emissions from brick production were mainly allocated to dry seasons during June to September.</li> </ul>                                                                                                                                                                                                                                                                                                                                                                                                                                                                                                                                                                                                                                                                                                                                                                                                                                                                                                                  |
| Malaysia    | <ul style="list-style-type: none"> <li>● Monthly production amounts during 2008-2010 were taken from Monthly Statistics Bulletin Malaysia and adopted as follows: <ul style="list-style-type: none"> <li>➤ Iron and steel: Combustion and non-combustion emissions from iron and steel industry.</li> <li>➤ Cement: Combustion and non-combustion emissions from cement industry.</li> <li>➤ Crude oil: NMVOC emissions from crude oil production</li> <li>➤ Natural gas: NMVOC emissions from natural gas production</li> <li>➤ Before 2007 and after 2011, monthly variations in 2008 and 2010 were used, respectively.</li> </ul> </li> <li>● Combustion and non-combustion emissions from brick production were mainly allocated to dry seasons during June to September.</li> <li>● Estimated monthly variation factors were used for all fuel types.</li> </ul>                                                                                                                                                                                                                             |
| Myanmar     | <ul style="list-style-type: none"> <li>● Combustion and non-combustion emissions from brick production were mainly allocated to dry seasons during December to April.</li> </ul>                                                                                                                                                                                                                                                                                                                                                                                                                                                                                                                                                                                                                                                                                                                                                                                                                                                                                                                  |
| Philippines | <ul style="list-style-type: none"> <li>● Monthly variations of emissions were estimated during 2001-2010 based</li> </ul>                                                                                                                                                                                                                                                                                                                                                                                                                                                                                                                                                                                                                                                                                                                                                                                                                                                                                                                                                                         |

|           |                                                                                                                                                                                                                                                                                                                                                                                                                                                                                                                                                                                                                                                                                                                                                                                                                                                                                                             |
|-----------|-------------------------------------------------------------------------------------------------------------------------------------------------------------------------------------------------------------------------------------------------------------------------------------------------------------------------------------------------------------------------------------------------------------------------------------------------------------------------------------------------------------------------------------------------------------------------------------------------------------------------------------------------------------------------------------------------------------------------------------------------------------------------------------------------------------------------------------------------------------------------------------------------------------|
|           | <p>on value of production index taken from Philippine Statistics Authority and adopted as follows:</p> <ul style="list-style-type: none"> <li>➤ Iron and steel: Combustion and non-combustion emissions from iron and steel industry.</li> <li>➤ Non-ferrous metal: Combustion and non-combustion emissions from non-ferrous metal industry.</li> <li>➤ Cement: Combustion and non-combustion emissions from cement industry.</li> <li>➤ Non-metallic minerals: Combustion and non-combustion emissions from non-metallic minerals industry except for cement.</li> <li>➤ Refined petroleum products: Combustion and non-combustion emissions from petroleum refinery.</li> <li>➤ Before 2000 and after 2011, monthly variations in 2001 and 2010 were used, respectively.</li> </ul> <ul style="list-style-type: none"> <li>● Estimated monthly variation factors were used for all fuel types.</li> </ul> |
| Singapore | <ul style="list-style-type: none"> <li>● Relative ratios of monthly production in 2006, 2008, and 2009 were estimated based on Monthly digest statistics Singapore and adopted as follows: <ul style="list-style-type: none"> <li>➤ Refinery petroleum products: Combustion and non-combustion emissions from petroleum refinery including energy sector.</li> <li>➤ Non-metallic minerals products: Combustion and non-combustion emissions from cement industry.</li> <li>➤ Before 2007 and after 2010, data in 2006 and 2009 were used, respectively. Estimated monthly variation factors were used for all fuel types.</li> </ul> </li> </ul>                                                                                                                                                                                                                                                           |
| Thailand  | <ul style="list-style-type: none"> <li>● Monthly variation factors were derived from Thao Pham et al. (2008) and adopted as follows: <ul style="list-style-type: none"> <li>➤ Basic Metal: Iron and steel and non-ferrous metal</li> <li>➤ Chemicals: Chemical and petrochemical</li> <li>➤ Non-Metal: Cement, lime, and non-specified non-metallic minerals except for brick</li> <li>➤ Food &amp; Beverage: Food and tobacco</li> <li>➤ Paper: Paper, pulp and printing</li> <li>➤ Wood &amp; Furniture: Wood and wood products</li> <li>➤ Textile: Textile and leather</li> <li>➤ Other: Other industry sectors not included above except for brick</li> </ul> </li> </ul>                                                                                                                                                                                                                               |

|                                  |                                                                                                                                                                                                                                                                                                                                                                                                                                                                                                                                                                                                                                                                                                                                                                                                                                                                                                                                                                                  |
|----------------------------------|----------------------------------------------------------------------------------------------------------------------------------------------------------------------------------------------------------------------------------------------------------------------------------------------------------------------------------------------------------------------------------------------------------------------------------------------------------------------------------------------------------------------------------------------------------------------------------------------------------------------------------------------------------------------------------------------------------------------------------------------------------------------------------------------------------------------------------------------------------------------------------------------------------------------------------------------------------------------------------|
|                                  | <p>industry whose emissions were mainly allocated to dry seasons during November to May.</p> <ul style="list-style-type: none"> <li>● Estimated monthly variation factors were used for all fuel types and periods.</li> </ul>                                                                                                                                                                                                                                                                                                                                                                                                                                                                                                                                                                                                                                                                                                                                                   |
| Vietnam                          | <ul style="list-style-type: none"> <li>● Monthly variations of emissions were estimated during 2005-2010 based on production amounts taken from General Statistics Office of Viet Nam and adopted as follows: <ul style="list-style-type: none"> <li>➤ Cement: Cement: Combustion and non-combustion emissions from cement industry.</li> <li>➤ Crude oil: NMVOC emissions from crude oil production</li> <li>➤ Natural gas: NMVOC emissions from natural gas production</li> <li>➤ Before 2004 and after 2011, monthly variations in 2005 and 2010 were used, respectively.</li> </ul> </li> <li>● Combustion and non-combustion emissions from brick production were mainly allocated to dry seasons during December to March.</li> <li>● Estimated monthly variation factors were used for all fuel types.</li> </ul>                                                                                                                                                         |
| Pakistan                         | <ul style="list-style-type: none"> <li>● Weighting factors: Monthly production</li> <li>● Data sources and treatment: <ul style="list-style-type: none"> <li>➤ Pig iron: and crude steel: National data during 2000-2010 were taken from Steel Statistical Yearbook (<a href="https://www.worldsteel.org/steel-by-topic/statistics/steel-statistical-yearbook.html">https://www.worldsteel.org/steel-by-topic/statistics/steel-statistical-yearbook.html</a>). Monthly production amounts of pig iron (crude steel) were used to calculate monthly variations for non-combustion emissions from pig iron (crude steel) production. Monthly variations for combustion emissions from iron and steel industry were estimated based on total production amounts of pig iron and crude steel. Before 1999 and 2011, monthly variations in 2000 and 2010 were used, respectively.</li> <li>➤ Estimated monthly variation factors were used for all fuel types.</li> </ul> </li> </ul> |
| Bangladesh<br>Nepal<br>Sri Lanka | <ul style="list-style-type: none"> <li>● Monthly variations of India were used for combustion and non-combustion emissions from brick production.</li> </ul>                                                                                                                                                                                                                                                                                                                                                                                                                                                                                                                                                                                                                                                                                                                                                                                                                     |

### **S9.2.3 Road transport**

#### **Japan**

Monthly variation factors for total emissions from road transport including hot, cold start and NMVOC evaporative emissions were calculated for each region using gridded emission data of JEI-DB (JPEC 2012a, c; 2014) in 2000, 2005, and 2010 for each species. For the year between 2000 and 2005/2005 and 2010, the data were interpolated. Before 1999 and after 2011, the data for 2000 and 2010 were used, respectively.

#### **Other countries and regions**

In REASv3, cold start emissions were estimated on a monthly basis using monthly average surface temperature. For hot emissions and NMVOC evaporative emissions, monthly variations were not considered. Annual emissions were distributed to each month using number of date as weighting factors. Data of surface temperature were obtained from NCEP reanalysis data provided by the NOAA/OAR/ESRL PSD, Boulder, Colorado, USA (<https://psl.noaa.gov/data/gridded/data.ncep.reanalysis.html>).

### **S9.2.4 Residential combustion**

#### **Japan**

Monthly variation factors for gas fuels, kerosene, and liquefied petroleum gas (LPG) were taken from a report of JEI-DB (2014) and used for all regions and periods. For other fuel types, data for LPG were adopted.

#### **Other countries and regions**

In REASv3, monthly variation of emissions from residential combustion was assumed to be correlated to monthly average surface temperature. Based on monthly proportions of coal consumption in Beijing, Tianjin, and Hebei taken from Zhu et al. (2018), indices of residential emissions as functions of monthly average temperature were created. Using the indices, monthly variations of emissions from residential combustion were estimated for each country and region based on monthly average surface temperature.

### **S9.2.5 Others**

#### **NH<sub>3</sub> emissions from human and latrines**

Monthly variations for Japan were obtained from JPEC (2014). For other countries and regions, similar to residential combustion described in Sect. S9.2.4, indices of emissions as function of monthly average surface temperature were created using data of JPEC (2014), assuming that NH<sub>3</sub> emissions from human and latrines are correlated to surface temperature. Then, using the indices, monthly variations of emissions from residential combustion were estimated for each country and region based on monthly average surface temperature.

#### **NMVOC emissions from solvent and paint use**

Monthly variation of evaporative emissions from solvent and paint use for each region of Japan were calculated using gridded emission data of JEI-DB (JPEC 2012b, c; 2014) in 2000, 2005 and 2010 for total solvent use. For the year between 2000 and 2005/2005 and 2010, the data were interpolated. Before 1999 and after 2011, the data for 2000 and 2010 were used, respectively. For other countries and regions, annual emissions were distributed to each month using number of days as weighting factors.

#### **Other sources**

For other sources not described above, annual emissions were distributed to each month using number of days as weighting factors.

## S10. Uncertainties

### S10.1 Methodology

In REASv3, uncertainties of emissions were estimated after Streets et al. (2003) and Huang et al. (2011) using the following equation:

$$U_{i,j} = 1.96 \times \sqrt{(1 + U_A^2)(1 + U_F^2) - 1} \times E_{i,j} \quad (1)$$

where  $E_{i,j}$  and  $U_{i,j}$  represents respectively emission and its uncertainty for sub-sector category  $j$  and its activity  $i$ ,  $U_A$  is uncertainty of  $i$  and  $U_F$  is uncertainty of emission factor for  $i$  and  $j$ .  $U_F$  were generally estimated based on uncertainties of emission factors ( $U_{EF}$ ) and those of removal ratios ( $U_R$ ) as follows:

$$U_F = \sqrt{U_{EF}^2 + U_R^2} \quad (2)$$

$U_F$  for SO<sub>2</sub> emissions based on sulfur contents of fuels and ratio of sulfur retention in ash were estimated using the following equation:

$$U_F = \sqrt{U_S^2 + U_{ERS}^2 + U_R^2} \quad (3)$$

where  $U_S$ ,  $U_{ERS}$ , and  $U_R$  represent uncertainties of sulfur contents in fuels, ratios of sulfur retention in ash, and removal ratios, respectively. For road transport sectors, activity data is annual mileage which were calculated by number of vehicles and annual distances traveled for each vehicle type.  $U_A$  for road transport sector were estimated using following equation:

$$U_F = \sqrt{U_{NV}^2 + U_{ADT}^2} \quad (4)$$

where  $U_{NV}$ , and  $U_{ADT}$  represent uncertainties of number of vehicles and those of annual distances traveled, respectively.

The uncertainties in emissions from power plants, industries, road transport, other transport, domestic and other sectors, as well as uncertainties in total emissions were calculated for all target species. The uncertainties of different sub-sectors and activities were combined in quadrature and estimated for each country and region. For uncertainties of national emissions in China, India, and Japan, those in their sub-regions were added linearly.

### S10.2 Settings of uncertainties of each component

In REASv3, uncertainties in emissions were estimated in 1955, 1985, and 2015 for all species and most sources. In this sub-section, settings of uncertainties of activity data, emission factors, and emission controls and their assumption are described. Note that uncertainties of emissions that were not originally developed in REASv3 (NH<sub>3</sub> emissions from manure management and fertilizer application, and NMVOC evaporative emissions from Japan and the Republic of Korea) were not evaluated.

### S10.2.1 Stationary combustion sources

#### Activity data

Activity data of stationary combustion sources are amounts of fuel consumption in each sub-sector. The data were derived from variety of sources and a lot of treatments were done for missing data as described in Sect. S3.1. Settings of uncertainties of the data were based on the differences of the data sources and following assumption were taken into considered:

- Values of uncertainties were estimated referring EEA (2016) assuming uncertainties of data for Asian countries are generally higher than those of European countries.
- Uncertainties of fossil fuel consumption data are lower for Japan, Republic of Korea, and Taiwan in 2015 and Japan in 1985 compare to other countries and regions. Those for China using the China Energy Statistical Yearbook (CESY) (National Bureau of Statistics of China, 1986, 2001-2017) and those for other countries using the International Energy Agency (IEA) World Energy Balances (IEAWEB) (IEA, 2017) are assumed to be the same.
- Uncertainties of primary biofuels (fuelwood, crop residue, and animal waste) are higher than those of fossil fuels.
- Uncertainties of other fuels such as charcoal and municipal wastes are higher than those of fossil fuels but lower than those of biofuels.
- Uncertainties of data in the United Nations (UN) Energy Statistics Database (UN, 2016) and the UN data, which is a web-based data service of the UN (<http://data.un.org/>) are higher than those in CESY and IEAWEB. (The data were used for Macau, Laos, Bhutan, Afghanistan, and Maldives in 1955, 1985, and 2015 and Cambodia in 1955 and 1985).
- Uncertainties of data in 2015 are lower than in 1985.
- Uncertainties of fuel consumption in power plants, iron and steel, and cement industries are lower than those in other industries.
- Uncertainties of fuel consumption in residential and other domestic sectors were higher than those in the other industries.
- All fuel consumption data in 1955 were extrapolated using trend factors (see Sect. S3.1). Therefore, the same settings of uncertainties much higher than 1985 are assumed.

Uncertainties of fuel consumption data adopted in REASv3 are summarized in Table 10.1.

**Table 10.1.** Uncertainties [%] of fuel consumption amounts in 1995, 1985, and 2015 assumed in REASv3. Values in the table (X/Y/Z) are for power plants and iron and steel, and cement industries/other industries/residential and other domestic sectors, respectively.

|                           | Fossil fuels           | Primary biofuels       | Other fuels            |
|---------------------------|------------------------|------------------------|------------------------|
| 2015                      |                        |                        |                        |
| Japan                     | $\pm 2/\pm 2/\pm 5$    | $\pm 30/\pm 30/\pm 30$ | $\pm 5/\pm 5/\pm 10$   |
| Group A                   | $\pm 2/\pm 2/\pm 5$    | $\pm 30/\pm 30/\pm 30$ | $\pm 5/\pm 5/\pm 10$   |
| Group B                   | $\pm 10/\pm 15/\pm 20$ | $\pm 30/\pm 30/\pm 30$ | $\pm 15/\pm 20/\pm 25$ |
| Group C                   | $\pm 30/\pm 30/\pm 30$ | $\pm 50/\pm 50/\pm 50$ | $\pm 35/\pm 35/\pm 35$ |
| 1985                      |                        |                        |                        |
| Japan                     | $\pm 5/\pm 10/\pm 15$  | $\pm 40/\pm 40/\pm 40$ | $\pm 10/\pm 15/\pm 20$ |
| Group A                   | $\pm 10/\pm 15/\pm 20$ | $\pm 40/\pm 40/\pm 40$ | $\pm 15/\pm 20/\pm 25$ |
| Group D                   | $\pm 15/\pm 20/\pm 25$ | $\pm 40/\pm 40/\pm 40$ | $\pm 20/\pm 25/\pm 30$ |
| Group E                   | $\pm 40/\pm 40/\pm 40$ | $\pm 60/\pm 60/\pm 60$ | $\pm 45/\pm 45/\pm 45$ |
| 1955                      |                        |                        |                        |
| All countries and regions | $\pm 50/\pm 50/\pm 50$ | $\pm 70/\pm 70/\pm 70$ | $\pm 55/\pm 55/\pm 55$ |

Group A: Republic of Korea and Taiwan. Group B: Countries and regions except for Japan and those in Group A and C using IEAWEBS in 2015. Group C: Macau, Laos, Bhutan, Afghanistan, and Maldives using UNESD in 2015. Group D: Group B – Cambodia. Group E: Group C + Cambodia.

### Emission factors

For emission factors, two causes need to be considered for their uncertainties. One is uncertainties in the data themselves. Another is those caused by selections of the data including technologies. Values of uncertainties of emission factors were not available in most literature used in REASv3. In addition, there is no specific way to quantify the uncertainties of emission factors caused by the second reason. In REASv3, uncertainties of emission factors were roughly estimated as summarized in Table 10.2 based on the following assumption:

- Uncertainties of CO<sub>2</sub> and SO<sub>2</sub> for gas and oil combustion are smaller than those of others. (Note that uncertainties of SO<sub>2</sub> estimated here were both for ratios of sulfur in fuels emitted as SO<sub>2</sub> (U<sub>ERS</sub> in equation (3) in Sect. 10.1) and for emission factors in the case of not using sulfur contents in fuels (see Sect. 3.2.1).)
- Uncertainties of NO<sub>x</sub> for fossil fuel combustion are larger than those of CO<sub>2</sub> and SO<sub>2</sub>, but smaller than those of other species.
- The same settings were adopted for CO, NMVOC, and PM species for fossil fuel combustion

except for those of PM species for coal combustion in residential sector where their uncertainties are assumed to be larger than those of other species.

- In general, uncertainties for coal combustion are larger than those for gas and oil combustion.
- Uncertainties for biofuel combustion are much larger than those for fossil fuel combustion. Due to lack of information, the same settings were used for uncertainties of emission factors for other fuels including charcoal and municipal wastes.
- The smallest uncertainties were assumed for power plants, the largest ones were assumed for residential and other domestic sectors, and uncertainties for industry sectors were generally between them.
- For industry sectors, uncertainties for iron and steel, and cement industries were smaller than those for other industry sectors.
- The largest uncertainties were assumed for NH<sub>3</sub> due to lack of limited information.
- The common settings of uncertainties were adopted for all countries and regions. Exceptions were uncertainties of emission factors of NO<sub>x</sub> for coal combustion in power plants and those of PM species for coal combustion in China based on Zhang et al. (2007) and Lei et al. (2011b) where 10% smaller values than those of other countries and regions were adopted.
- It was assumed that estimated uncertainties for emission factors include effects from limited information of technologies.

Note that except for SO<sub>2</sub> and CO<sub>2</sub>, uncertainties for the year 1985 and 1955 were assumed to be 10% and 20% larger than those in 2015, respectively. For SO<sub>2</sub> and CO<sub>2</sub>, settings of uncertainties were not changed between 2015, 1985, and 1955.

For SO<sub>2</sub>, uncertainties for sulfur contents in fuels including effects of regulation (i.e. usage of low sulfur fuels) need to be taken into considered. The uncertainties were assumed based on data sources as follows:

- China:
  - 15%/15%, 15%/20%, and 20%/25% for coal, light and diesel oil, and heavy oil in 2015/1985, respectively.
  - 30% for all fossil fuels in 1955.
- India:
  - 20%/15%, 30%/25%, 20%/20%, and 25%/25% for hard coal, brown coal, light and diesel oil, and heavy oil in 2015/1985, respectively.
  - 30% for all fossil fuels in 1955.
- Japan:
  - 10%/10%, 20%/20%, 15%/15%, and 20%/20% for hard coal, brown coal, light and diesel oil, and heavy oil in 2015/1985, respectively.

- 30% for all fossil fuels in 1955.
- Republic of Korea and Taiwan
  - 20%/15%, 30%/25%, 20%/15%, and 25%/20% for hard coal, brown coal, light and diesel oil, and heavy oil in 2015/1985, respectively.
  - 30% for all fossil fuels in 1955.
- Others:
  - 20%/15%, 30%/25%, 20%/20%, and 25%/25% for coal, light and diesel oil, and heavy oil in 2015/1985.
  - 30% for all fossil fuels in 1955.

Note that uncertainties in 1985 were smaller than other years for some countries and regions because the data were based on detailed surveys of Kato et al. (1991).

**Table 10.2.** Uncertainties [%] of emission factors of fuel combustion in 2015 assumed in REASv3. Values in the table (W/X/Y/Z) are for power plants/iron and steel, and cement industries/other industries/residential and other domestic sectors, respectively.

|                   | Coal fuels                                                              | Gas and oil fuels   | Primary biofuels    | Others              |
|-------------------|-------------------------------------------------------------------------|---------------------|---------------------|---------------------|
| SO <sub>2</sub>   | ±15/±20/±25/±30                                                         | ±10/±10/±10/±10     | ±75/±75/±100/±125   | ±75/±75/±100/±125   |
| NO <sub>x</sub>   | ±30 <sup>a</sup> /±40/±50/±60                                           | ±30/±40/±50/±60     | ±75/±75/±100/±125   | ±75/±75/±100/±125   |
| CO                | ±50/±60/±70/±80                                                         | ±40/±50/±60/±75     | ±75/±75/±100/±125   | ±75/±75/±100/±125   |
| NMVOC             | ±50/±60/±70/±80                                                         | ±40/±50/±60/±75     | ±75/±75/±100/±125   | ±75/±75/±100/±125   |
| NH <sub>3</sub>   | ±100/±100/±100/±100                                                     | ±100/±100/±100/±100 | ±150/±150/±150/±150 | ±150/±150/±150/±150 |
| CO <sub>2</sub>   | ±15/±15/±15/±15                                                         | ±10/±10/±10/±10     | ±50/±50/±50/±50     | ±25/±25/±25/±25     |
| PM <sub>10</sub>  | ±50 <sup>a</sup> /±60 <sup>a</sup> /±70 <sup>a</sup> /±100 <sup>a</sup> | ±40/±50/±60/±75     | ±100/±100/±125/±150 | ±100/±100/±125/±150 |
| PM <sub>2.5</sub> | ±50 <sup>a</sup> /±60 <sup>a</sup> /±70 <sup>a</sup> /±100 <sup>a</sup> | ±40/±50/±60/±75     | ±100/±100/±125/±150 | ±100/±100/±125/±150 |
| BC                | ±50 <sup>a</sup> /±60 <sup>a</sup> /±70 <sup>a</sup> /±100 <sup>a</sup> | ±40/±50/±60/±75     | ±100/±100/±125/±150 | ±100/±100/±125/±150 |
| OC                | ±50 <sup>a</sup> /±60 <sup>a</sup> /±70 <sup>a</sup> /±100 <sup>a</sup> | ±40/±50/±60/±75     | ±100/±100/±125/±150 | ±100/±100/±125/±150 |

a. 10% smaller values were adopted for China.

### Effects of emission controls

For removal efficiencies, the same as for emission factors, it is necessary to consider uncertainties in the data themselves and those caused by selection of data. In addition, uncertainties in settings of emission controls such as timing of introduction and penetration rates of abatement equipment need to be considered where there is no specific way to quantify the uncertainties neither. In REASv3, total uncertainties in effects of emission controls, namely  $U_R$  in equations (2) and (3) in Sect. 10.1 were roughly estimated as summarized in Table 10.3 based on the following assumption:

- $U_R$  are assumed to be smaller if settings were generally based on local information and literatures. For example, those for Japan were generally smaller than other countries because their settings were based on domestic information such as MRI (2015) and MOEJ (2000).
- For emission sources where no emission controls were considered, corresponding  $U_R$  were assumed to be zero which means that uncertainties caused by neglecting emission controls were not considered. For example,  $U_R$  were assumed to be zero for all emission sources, species, and countries and regions in 1955.
- For emission sources where introduction rates of abatement equipment were small, uncertainties caused by settings of emission controls were assumed to be small.

**Table 10.3.** Settings of total uncertainties in effects of emission controls ( $U_R$ ) adopted in REASv3. Note that  $U_R$  for sources without description here were assumed to be zero.

| Countries and regions | Settings of $U_R$                                                                                                                                                                                                                                                                                                                                                                                                                                                                                                                                                                                                                                                                                                                                                          |
|-----------------------|----------------------------------------------------------------------------------------------------------------------------------------------------------------------------------------------------------------------------------------------------------------------------------------------------------------------------------------------------------------------------------------------------------------------------------------------------------------------------------------------------------------------------------------------------------------------------------------------------------------------------------------------------------------------------------------------------------------------------------------------------------------------------|
| China                 | <ul style="list-style-type: none"> <li>● <math>SO_2</math>: <math>U_R</math> were only estimated in 2015. The values for power plants were assumed to be 20% and those for industry sectors were 10% higher than those for power plants (namely 30%).</li> <li>● <math>NO_x</math>: The same as for <math>SO_2</math>, <math>U_R</math> for power plants were only estimated in 2015 and the values were assumed to be 25% (5% higher than those for <math>SO_2</math>). The same values were adopted for cement industries.</li> <li>● PM species: <math>U_R</math> for power plants in 2015 and 1985 were assumed to be 15% and 20%, respectively. For industry sectors, 5% higher values were adopted (namely, 20% and 25% for 2015 and 1985, respectively).</li> </ul> |
| India                 | <ul style="list-style-type: none"> <li>● <math>SO_2</math>: Only for power plants as point sources with FGD, 20% were adopted for their <math>U_R</math>.</li> <li>● PM species: Due to lack of information, 10% higher values were adopted for power plants and industry sectors as follows: In 2015 and 1985, 25% and 30% for power plants and 30% and 35% for industry sectors, respectively.</li> </ul>                                                                                                                                                                                                                                                                                                                                                                |
| Japan                 | <ul style="list-style-type: none"> <li>● <math>SO_2</math>: <math>U_R</math> in both 2015 and 1985 were assumed to be 20% for power plants. For industry sectors, 5% higher values than those for power plants were adopted (namely 25%).</li> <li>● <math>NO_x</math>: The same settings for <math>SO_2</math> were used for both power plants and industry sectors in 2015 and 1985.</li> <li>● PM species: For power plants, <math>U_R</math> in both 2015 and 1985 were assumed to be 10%. For industry sectors, higher values than those of power plants were assumed as follows: 15% and 20% in 2015 and 1985, respectively.</li> </ul>                                                                                                                              |

|                             |                                                                                                                                                                                                                                                                                                                                                                                                                                                                                                                                                                                                                       |
|-----------------------------|-----------------------------------------------------------------------------------------------------------------------------------------------------------------------------------------------------------------------------------------------------------------------------------------------------------------------------------------------------------------------------------------------------------------------------------------------------------------------------------------------------------------------------------------------------------------------------------------------------------------------|
| Korea and Taiwan            | <ul style="list-style-type: none"> <li>● SO<sub>2</sub>: U<sub>R</sub> for power plants and industry sectors in 2015 were assumed to be 25% and 30%, respectively. In 1985, assuming relatively lower introduction rates of abatement equipment, 10% lower values than those for 2015 were adopted (15% and 20% for power plants and industry sectors, respectively).</li> <li>● NO<sub>x</sub>: U<sub>R</sub> were only estimated for power plants in 2015 and 5% higher values than those for SO<sub>2</sub> were assumed (namely 30%).</li> <li>● PM species: The same settings for China were adopted.</li> </ul> |
| Thailand                    | <ul style="list-style-type: none"> <li>● SO<sub>2</sub>: U<sub>R</sub> were only estimated for power plants in 2015. The values were assumed to be 25%.</li> <li>● PM species: The same settings for India were adopted.</li> </ul>                                                                                                                                                                                                                                                                                                                                                                                   |
| Other countries and regions | <ul style="list-style-type: none"> <li>● SO<sub>2</sub>: Only for power plants as point sources with FGD, 20% were adopted for their U<sub>R</sub>.</li> <li>● PM species: U<sub>R</sub> were assumed for power plants and industry sectors only for the year 2015. 5% higher values than those for Thailand were adopted (namely, 30% for power plants and 35% for industry sectors.)</li> </ul>                                                                                                                                                                                                                     |

### S10.2.2 Stationary non-combustion sources: Industrial production and other transformation

#### Activity data

Activity data for emissions from industrial production and other transformation were such as production amounts of industrial products and input amounts of materials. The same as for the case of fuel consumption data as described in Sect. 10.2.1, uncertainties of the activity data depend on reliability and availability of their data sources and for settings of the uncertainties, following assumptions were taken into considered:

- In the same international statistics, uncertainties of data are lower for Japan, Republic of Korea, and Taiwan in 2015 and Japan in 1985 compare to other countries and regions.
- Uncertainties of activity data estimated by such as interpolation or extrapolation were larger than those directly taken from the statistics and literatures.
- Uncertainties of major industrial products such as metals and cement are smaller than minor ones such as lime and carbon black even though data were taken from the same international statistics.

Uncertainties of activity data for emissions from industrial products and other transformation adopted in REASv3 are summarize in Table 10.4.

**Table 10.4.** Settings of uncertainties of activity data for industrial production and other

transformation adopted in REASv3. Note that settings for non-combustion sources of NMVOC and NH<sub>3</sub> were described in Sects. S10.2.3 and S10.2.6, respectively.

| Sub-sector categories        | Settings of uncertainties of activity data                                                                                                                                                                                                                                                                                                                                                                                                                                                                                                                                                                         |
|------------------------------|--------------------------------------------------------------------------------------------------------------------------------------------------------------------------------------------------------------------------------------------------------------------------------------------------------------------------------------------------------------------------------------------------------------------------------------------------------------------------------------------------------------------------------------------------------------------------------------------------------------------|
| Iron and steel production    | <ul style="list-style-type: none"> <li>● If data were directly taken from data sources, values of uncertainties were assumed as follows: <ul style="list-style-type: none"> <li>➤ 5% for Japan, Republic of Korea and Taiwan in 2015 and Japan in 1985</li> <li>➤ 10% for other countries and regions in 2015 and 1985</li> </ul> </li> <li>● For all countries and regions, if data were estimated by interpolation or extrapolation, the uncertainties were assumed to be 15% in 2015 and 1985.</li> <li>● For the year 1955, the uncertainties were assumed to be 20% for all countries and regions.</li> </ul> |
| Non-ferrous metal production | <ul style="list-style-type: none"> <li>● The same settings for iron and steel production were adopted.</li> </ul>                                                                                                                                                                                                                                                                                                                                                                                                                                                                                                  |
| Cement production            | <ul style="list-style-type: none"> <li>● The same settings for iron and steel production were adopted.</li> </ul>                                                                                                                                                                                                                                                                                                                                                                                                                                                                                                  |
| Lime production              | <ul style="list-style-type: none"> <li>● The same criteria for iron and steel production were assumed for differences of settings among countries and regions and years. For values of the uncertainties, 5% higher values than those for iron and steel production were adopted.</li> </ul>                                                                                                                                                                                                                                                                                                                       |
| Brick production             | <ul style="list-style-type: none"> <li>● Due to lack of available data and information, high uncertainties were assumed as follows: 40%, 50%, and 75% for all countries and regions in 2015, 1985, and 1955, respectively.</li> </ul>                                                                                                                                                                                                                                                                                                                                                                              |
| Sulphuric acid production    | <ul style="list-style-type: none"> <li>● The same settings for iron and steel production were adopted.</li> </ul>                                                                                                                                                                                                                                                                                                                                                                                                                                                                                                  |
| Carbon black production      | <ul style="list-style-type: none"> <li>● The same settings for lime production were adopted.</li> </ul>                                                                                                                                                                                                                                                                                                                                                                                                                                                                                                            |
| Coke production              | <ul style="list-style-type: none"> <li>● The same settings for coal consumption in iron and industry in Table 10.1</li> </ul>                                                                                                                                                                                                                                                                                                                                                                                                                                                                                      |
| Petroleum refineries         | <ul style="list-style-type: none"> <li>● The same settings for oil consumption in other industries in Table 10.1.</li> </ul>                                                                                                                                                                                                                                                                                                                                                                                                                                                                                       |

## Emission factors and effects of emission controls

Causes of uncertainties of emission factors and effects of emission controls ( $U_R$ ) for industrial production and other transformation sectors were basically the same as for those for fuel combustion. Table 10.5 summarizes the settings of uncertainties and related assumptions for emission factors and effects of emission controls adopted in REASv3. Note that except for  $SO_2$  and  $CO_2$ , uncertainties of emission factors for the year 1985 and 1955 were assumed to be 10% and 20% larger than those in 2015, respectively, the same as the case for fuel combustion sources. Settings of uncertainties for  $SO_2$  for non-ferrous metal production and  $CO_2$  were not changed between 2015, 1985, and 1955.

**Table 10.5.** Settings of uncertainties of emission factors in 2015 and effects of emission controls ( $U_R$ ) for industrial production and other transformation adopted in REASv3. Values were commonly used for all countries and regions unless otherwise indicated.

| Sub-sector categories        | Settings of uncertainties of emission factors and $U_R$                                                                                                                                                                                                                                                                                                                                                                                                                                                                                                                                                                                                                                                                                                                                                                                                                                                                                                                            |
|------------------------------|------------------------------------------------------------------------------------------------------------------------------------------------------------------------------------------------------------------------------------------------------------------------------------------------------------------------------------------------------------------------------------------------------------------------------------------------------------------------------------------------------------------------------------------------------------------------------------------------------------------------------------------------------------------------------------------------------------------------------------------------------------------------------------------------------------------------------------------------------------------------------------------------------------------------------------------------------------------------------------|
| Iron and steel production    | <ul style="list-style-type: none"> <li>● Emission factors: 40% for <math>CO</math>, 15% for <math>CO_2</math>, and 60% for PM species.</li> <li>● <math>U_R</math>: Settings for fuel combustion in iron and steel industry were adopted. For China, the uncertainties in 2015 were assumed to be 10% because the settings were based on local information of Wu et al. (2017).</li> </ul>                                                                                                                                                                                                                                                                                                                                                                                                                                                                                                                                                                                         |
| Non-ferrous metal production | <ul style="list-style-type: none"> <li>● Emission factors: 20% for <math>SO_2</math> and 60% for PM species.</li> <li>● <math>U_R</math>: Settings for fuel combustion in other industries were adopted for PM species. For <math>SO_2</math>, considering uncertainties in collection amounts for sulphuric acid production, high uncertainties of 30% were assumed for the years 2015 and 1985.</li> </ul>                                                                                                                                                                                                                                                                                                                                                                                                                                                                                                                                                                       |
| Cement production            | <ul style="list-style-type: none"> <li>● Emission factors: <ul style="list-style-type: none"> <li>➤ Japan: As described in Sect. S3.2 and S4.1.3, <math>NO_x</math>, <math>CO</math>, and PM species from fuel consumption in cement kilns were estimated using local information of cement production in each kiln type. Therefore, values of uncertainties for <math>NO_x</math>, <math>CO</math>, and PM species were assumed to be 20% lower than those for default settings in Table 10.2.</li> <li>➤ PM species: 60% was adopted except for China and Japan. For China, because settings were based on local information of Lei et al. (2011a) and Wu et al. (2017), 20% lower values were adopted (namely 40%).</li> <li>➤ <math>CO_2</math>: Considering uncertainties in clinker to cement ratios, relatively high uncertainties (20%) was adopted.</li> </ul> </li> <li>● <math>U_R</math>: Settings for fuel combustion in cement industry were adopted. For</li> </ul> |

|                           |                                                                                                                                                                                                                                                                                                                                                                                        |
|---------------------------|----------------------------------------------------------------------------------------------------------------------------------------------------------------------------------------------------------------------------------------------------------------------------------------------------------------------------------------------------------------------------------------|
|                           | China, the uncertainties in 2015 were assumed to be 10% because the settings were based on local information of Hua et al. (2016).                                                                                                                                                                                                                                                     |
| Lime production           | <ul style="list-style-type: none"> <li>● Emission factors: 15% and 60% were adopted for CO<sub>2</sub> and PM species, respectively.</li> <li>● U<sub>R</sub>: The same settings for fuel combustion in other industries were adopted.</li> </ul>                                                                                                                                      |
| Brick production          | <ul style="list-style-type: none"> <li>● Emission factors: <ul style="list-style-type: none"> <li>➤ CO: 60% were adopted for countries and regions where emissions were estimated using amounts of brick production.</li> <li>➤ PM species: 60% were adopted.</li> </ul> </li> <li>● U<sub>R</sub>: The same settings for fuel combustion in other industries were adopted.</li> </ul> |
| Sulphuric acid production | <ul style="list-style-type: none"> <li>● Emission factors: 20% were adopted for SO<sub>2</sub>.</li> <li>● U<sub>R</sub>: The same settings for fuel combustion in other industries were adopted.</li> </ul>                                                                                                                                                                           |
| Carbon black production   | <ul style="list-style-type: none"> <li>● Emission factors: 60% was adopted for PM species.</li> <li>● U<sub>R</sub>: The same settings for fuel combustion in other industries were adopted.</li> </ul>                                                                                                                                                                                |
| Coke production           | <ul style="list-style-type: none"> <li>● Emission factors: 40% for CO, 15% for CO<sub>2</sub>, and 60% for PM species.</li> <li>● U<sub>R</sub>: The same settings for fuel combustion in iron and steel industry were adopted.</li> </ul>                                                                                                                                             |
| Petroleum refineries      | <ul style="list-style-type: none"> <li>● Emission factors: 20% for SO<sub>2</sub> and 60% for PM species.</li> <li>● U<sub>R</sub>: The same settings for fuel combustion in other industries were adopted.</li> </ul>                                                                                                                                                                 |

### S10.2.3 Non-combustion sources of NMVOC

Basically, causes of uncertainties of activity data and emission factors for non-combustion sources of NMVOC are the same as for those for combustion sources, industrial production and other transformation described in Sects. S10.2.1 and S10.2.2. Due to lack of available data and information, the uncertainties for non-combustion sources of NMVOC were generally assumed to be larger than other sources as described in this sub-section. Note that emission controls of NMVOC were not considered in REASv3 and influences of their uncertainties were neglected. In addition, note that uncertainties of non-combustion sources of NMVOC emissions in Japan and Republic of Korea which depended on other inventories were not estimated.

### Extraction processes

Activity data for extraction processes were taken from energy statistics. The settings of the uncertainties were assumed to be the same as for those of gas and oil fuels in power plants, iron and steel, and cement industries in Table 10.1. For emission factors, the uncertainties were assumed to be

70% except for petroleum refinery where lower uncertainty of 50% was assumed. The settings for emission factors were commonly used for all countries and regions for all target years.

### **Solvent use**

As described in Sect. S5.1, activity data of solvent use in REASv3 were based on limited available statistics and literatures and if appropriate data were not available, activity data of REASv2 during 2000-2008 were used as default. In addition, missing data were often estimated by extrapolation of GDP. Considering the above limitations, relatively high uncertainties were assumed for activity data as follows:

- If activity data were directly based on available statistics and literatures, the uncertainties were assumed to be 20%.
- If activity data were derived by interpolated or extrapolated from the available statistics and literatures, the uncertainties of them were assumed to be 30%, 40% and 50% in 2015, 1985, and 1955, respectively.
- If activity data were based on default, the uncertainties of them were assumed to be 40% for data of 2015 and 50% for those of 1985 and 1955.
- For vehicle treatment, activity data are number of registered vehicles and their uncertainties were described in Sect. S10.2.4.
- For domestic use of solvents, activity data are number of urban and rural populations. Considering uncertainties in urban and rural population ratios, the uncertainties were assumed to be 10% higher than those of total population number described in Sect. S10.2.6.
- For paint use for automobile manufacturing, activity data were production number of vehicles. For activity data directly taken from statistics in 2015 and 1985, the uncertainties were assumed to be 10% and 20%, respectively. If activity data were derived by interpolated or extrapolated from the available statistics and literatures, the uncertainties of them were assumed to be 20%, 30% and 50% in 2015, 1985, and 1955, respectively.

For emission factors, uncertainties of 70% were commonly used for all sub-categories, countries and regions, and target years.

## **Chemical industry**

Uncertainties of activity data for chemical industry were assumed basically same procedures for those of solvent use as follows:

- If activity data were based on available statistics and literatures, the uncertainties of them were assumed to be 15%, 25%, and 40% for the years of 2015, 1985, and 1955, respectively. Considering the availability of statistics and literatures, values of uncertainties were assumed to be lower than those of solvent use.
- If activity data were based on default, the uncertainties of them were assumed to be 40% for data of 2015 and 50% for those of 1985 and 1955.
- For carbon black production, see Table 10.4 for settings of the uncertainties.

For emission factors, uncertainties of 70% were commonly used for all sub-categories, countries and regions, and target years. For carbon black production, lower uncertainties of 50% was assumed.

## **Other industry**

Activity data of other industry are production amounts of bread, beer, coke, asphalt, crude steel, hot rolled steel, and pulp and paper. Uncertainties of them were assumed as follows:

- For bread, beer, and asphalt, pulp and paper production, the uncertainties of activity data were assumed based on the same procedures for chemical industry.
- For coke, crude steel, and hot rolled steel production, see Table 10.4 for settings of the uncertainties.

For emission factors, uncertainties of 70% were commonly used for all sub-categories, countries and regions, and target years except for coke, crude steel and hot rolled steel production where lower uncertainties of 50% was assumed.

## **Waste disposal**

Activity data of waste disposal sector are amounts of municipal wastes and their uncertainties were assumed based on available data sources as follows:

- If data were directly taken from national or international statistics and literatures, the uncertainties were assumed to be 30% in 2015 and 40% in 1985.
- If data were estimated by interpolation or extrapolation, the uncertainties were assumed to be 40% for 2015 and 50% for 1985 and 75% for 1955.

For emission factors, uncertainties of 80% were commonly used for all sub-categories, countries and regions, and target years.

## S10.2.4 Road transport

### Activity data

Activity data of emissions from road transport were number of vehicles and annual distance travelled for NO<sub>x</sub>, CO, NMVOC, NH<sub>3</sub>, and PM species. Uncertainties of number of vehicles which were also used for estimation of NMVOC evaporative emissions were assumed based on data sources as follows:

- For data based on detailed national statistics, the uncertainties were assumed to be 10% for passenger cars, 15% for buses and motor cycles, and 20% for trucks. If data were interpolated or extrapolated based on the detailed national statistics, uncertainties in 1985 (1955) were assumed to be 15% (30%) for passenger cars, 20% (40%) for buses and motor cycles, and 25% (40%) for trucks.
- For data based on IRF (1976-2018), the uncertainties were assumed to be 20% for passenger cars, 25% for buses and motor cycles, and 30% for trucks. If data were interpolated or extrapolated based on international statistics, uncertainties in 1985 (1955) were assumed to be 25% (40%) for passenger cars, 30% (50%) for buses and motor cycles, and 35% (50%) for trucks.
- For data based on IRF (1976-2018) and national information, the uncertainties were assumed to be 15% for passenger cars, 20% for buses and motor cycles, and 25% for trucks. If data were interpolated or extrapolated based on national or international statistics, uncertainties in 1985 (1955) were assumed to be 20% (30%) for passenger cars, 25% (40%) for buses and motor cycles, and 30% (40%) for trucks.

Similarly, uncertainties of annual distance travelled were assumed based on data sources as follows:

- For data based on national information, the uncertainties were assumed to be 15% for passenger cars and motor cycles and 20% for buses and trucks.
- For data based on national data in Clean Air Asia (2012), the uncertainties were assumed to be 20% for passenger cars and motor cycles and 30% for buses and trucks.
- For other data such as average of Asian data in Clean Air Asia (2012), the uncertainties were assumed to be 30% for passenger cars and motor cycles and 40% for buses and trucks.
- For Japan where annual mileage data were directly obtained from literatures and statistics, uncertainties of the annual mileages were assumed to be 10%/15%/25% for cars, buses, and trucks and 15%/20%/30% for motorcycles and special purpose vehicles in 2015/1985/1955.

For SO<sub>2</sub> and CO<sub>2</sub>, emissions from road transport were estimated based on fuel consumption as described in Sect. S6.2.3. The uncertainties of activity data were assumed to be the same values for oil consumption in power plants, iron and steel, and cement industries in Table 10.1.

## Emission factors

For emission factors of exhaust emissions from road vehicles, uncertainties were estimated as summarized in Table 10.6 based on the following assumptions:

- The lowest uncertainties were assumed for Japan where detailed local information was available for estimation of emission factors.
- Uncertainties of emission factors for China and India referring studies of national emission inventories were also smaller than those of other countries and regions.
- Uncertainties of emission factors were assumed to be smaller for NO<sub>x</sub> and larger for PM species and those of CO and NMVOC were between them. Due to lack of information, uncertainties for NH<sub>3</sub> were assumed to be the largest.
- The same settings were adopted for all vehicle types except for rural vehicles and special purpose vehicles where 10% higher uncertainties were considered.

**Table 10.6.** Uncertainties [%] of emission factors of exhaust emissions in 2015/1985/1955 for NO<sub>x</sub>, CO, NMVOC, NH<sub>3</sub>, and PM species. All data were commonly adopted for all vehicle types except for rural vehicles and special purpose vehicles where 10% higher uncertainties were used.

|                 | China and India | Japan       | Others         |
|-----------------|-----------------|-------------|----------------|
| NO <sub>x</sub> | ±25/±35/±45     | ±20/±30/±40 | ±30/±40/±50    |
| CO              | ±35/±45/±55     | ±30/±40/±50 | ±40/±50/±60    |
| NMVOC           | ±35/±45/±55     | ±30/±40/±50 | ±40/±50/±60    |
| NH <sub>3</sub> | ±100/±100/±100  | ±75/±75/±75 | ±100/±100/±100 |
| PM species      | ±45/±55/±65     | ±40/±50/±60 | ±50/±60/±70    |

For CO<sub>2</sub> and SO<sub>2</sub>, the uncertainties of emission factors were assumed to be 10% which are the same settings for stationary combustion. In addition, for SO<sub>2</sub>, uncertainties of sulfur contents in gasoline and diesel oil were also taken from settings for stationary combustion provided in Sect. S10.2.1.

For estimation of NMVOC evaporative emissions, simple methodology of EEA (2016) were adopted as described in Sect. S6.3. Therefore, high uncertainties of 100% were assumed for the emission factors.

### **S10.2.5 Other transport**

As described in Sect. S7, other transport sector includes railway, pipeline transport and non-specified sectors defined in the IEAWEB. Settings of the uncertainties of their activity data and emission factors were the same as for those of fuel combustion in other industries.

### **S10.2.6 Non-combustion sources of NH<sub>3</sub>**

In REASv3, for non-combustion sources of NH<sub>3</sub>, uncertainties of emissions from fertilizer production, human, and latrines were estimated. The uncertainties of activity data and emission factors were estimated by the same procedures for those of NMVOC. Settings and assumptions for the uncertainties are described in this sub-section. Note that emissions from manure management and fertilizer application were not originally estimated and thus, their uncertainties were not estimated.

#### **Fertilizer production**

As described in Sect. S8.3, activity data of NH<sub>3</sub> emissions from fertilizer production considered in REASv3 are ammonia, ammonium nitrate, and urea and the uncertainties were assumed as follows:

- Ammonia: In 2015, data were taken from Minerals Yearbook (USGS) and their uncertainties were assumed to be 15%. For the year 1985, the uncertainties were assumed to be 20% for China and Japan where national trend factors were available and those for other countries were assumed to be 30%. In 1955, the uncertainties were assumed to be 40% for all countries and regions.
- Ammonium nitrate: For Japan where national statistics were available, the same settings for ammonia were adopted. For other countries, higher uncertainties were assumed as 30%, 40%, and 50%, respectively.
- Urea: For China and Japan where national statistics were available, the same settings for ammonia were adopted. For other countries, the settings for ammonium nitrate were used.

For emission factors, uncertainties of 50% were commonly used for all sub-categories, countries and regions, and target years.

## **Human perspiration and respiration**

Activity data of  $\text{NH}_3$  emissions from human perspiration and respiration is number of total population and the uncertainties were assumed as follows:

- Similar to the case for IEAWEB, low uncertainties of 2% were assumed for Japan in 2015 and 1985 and Republic of Korea and Taiwan in 2015.
- For others, uncertainties were assumed to be 5% in 2015 and 1985 and 10% in 1955.

For emission factors, uncertainties of 50% were commonly used for all sub-categories, countries and regions, and target years.

## **Latrines**

Activity data of  $\text{NH}_3$  emissions from latrines are number of population in no sewage service areas. Available data were very limited except for Japan and the uncertainties were assumed as follows:

- Uncertainties for Japan were assumed to be 10% in 2015 and 1985 and 30% in 1955.
- For other countries and regions, uncertainties were assumed to be 30%, 40%, and 50% in 2015, 1985, and 1955, respectively.

For emission factors, uncertainties of 70% were commonly used for all sub-categories, countries and regions, and target years.

## References

- Akagi, S. K., Yokelson, R. J., Wiedinmyer, C., Alvarado, M. J., Reid, J. S., Karl, T., Crounse, J. D., and Wennberg, P. O.: Emission factors for open and domestic biomass burning for use in atmospheric models, *Atmos. Chem. Phys.*, 11, 4039–4072, <https://doi.org/10.5194/acp-11-4039-2011>, 2011.
- Baidya, S. and Borken-Kleefeld, J.: Atmospheric emissions from road transportation in India, *Energy Policy*, 37, 3812–3822, <https://doi.org/10.1016/j.enpol.2009.07.010>, 2009.
- Barcelo, L., Kline, J., Walenta, G., and Gartner, E.: Cement and carbon emissions, *Mater. Struct.*, 47, 1055–1065, <https://doi.org/10.1617/s11527-013-0114-5>, 2014.
- Boken, J., Stellter, H., Merétei, T., and Vanhove, F.: Global and country inventory of road passenger and freight transportation: Fuel consumption and emissions of air pollutants in Year 2000, *Transportation Research Record: Journal of the Transportation Research Board*, 2011, 127–136, <https://doi.org/10.3141/2011-14>, 2007.
- Bond, T. C., Streets, D. G., Yarber, K. F., Nelson, S. M., Woo, J.-H., and Klimont, Z.: A technology-based global inventory of black and organic carbon emissions from combustion, *J. Geophys. Res.*, 109, D14203, <https://doi.org/10.1029/2003JD003697>, 2004.
- Chandramouli, C.: Census of India 2011, Tables on Houses, Household Amenities and Assets, the Indian Administrative Service Registrar General & Census Commissioner, India, 2011.
- Chen, L., Sun, Y., Wu, X., Zhang, Y., Zheng, C., Gao, X., and Cen, K. Unit-based emission inventory and uncertainty assessment of coal-fired power plants, *Atmos. Environ.*, 99, 527–535, <https://doi.org/10.1016/j.atmosenv.2014.10.023>, 2014.
- Chiemchaisri, C., Juanga, J. P., and Visvanathan, C.: Municipal solid waste management in Thailand and disposal emission inventory, *Environ. Monit. Assess.*, 135, 13–20, <https://doi.org/10.1007/s10661-007-9707-1>, 2007.
- China Data Online: <https://www.china-data-online.com>.
- Chollacoop, N., Saisirirat, P., Fukuda, T., and Fukuda, A.: Scenario Analyses of Road Transport Energy Demand: A Case Study of Ethanol as a Diesel Substitute in Thailand, *Energies*, 4, 108–125, <https://doi.org/10.3390/en4010108>, 2011.
- Clean Air Asia: Road Map to Cleaner Fuels and Vehicles in Asia, Factsheet No. 17, Clean Air Initiative for Asian Cities Center-Asia, Pasing City, Philippines, 2011.
- Clean Air Asia: Accessing Asia: Air Pollution and Greenhouse Gas Emissions Indicators for Road Transport and Electricity, Pasing City, Philippines, 2012.
- Clean Air Asia: Developments in the Asia-Pacific Region, the 10th Global Partnership Meeting of the Partnership for Clean Fuels and Vehicles, Paris, 2014.
- Constant, K. and Sheldrick, W. F.: World Nitrogen Survey, The International Bank for

- Reconstruction and Development/The World Bank, 1992.
- Crippa, M., Janssens-Maenhout, G., Dentener, F., Guizzardi, D., Sindelarova, K., Muntean, M., Van Dingenen, R., and Granier, C.: Forty years of improvements in European air quality: regional policy-industry interactions with global impacts, *Atmos. Chem. Phys.*, 16, 3825–3841, <https://doi.org/10.5194/acp-16-3825-2016>, 2016.
- Ebata, Y., Higo, Y., and Ando, J.: Energy Consumption and Air Pollution Control in East Asian Countries (in Japanese), Technical Report, 51, <http://hdl.handle.net/11035/823/> (last access: 9 August 2020), 1997.
- Economy, Trade and Industry Statistics Association: Yearbook of Paper and Pulp Statistics, Ministry of International Trade and Industry, 1998.
- EEA (European Environment Agency): EMEP/CORINAIR Atmospheric emission inventory guidebook - First edition 1996, available at: <https://www.eea.europa.eu/themes/air/air-pollution-sources-1/emep-eea-air-pollutant-emission-inventory-guidebook> (last access: 9 August 2020) , 1996.
- EEA: EMEP/EEA air pollutant emission inventory guidebook 2016, EEA Report, 21, available at: <https://www.eea.europa.eu/publications/emep-eea-guidebook-2016>, 2016.
- Environment Bureau: Clean air plan for Hong Kong, Environment Bureau in collaboration with Transport & Housing Bureau, Food & Health Bureau, and Development Bureau, 2013.
- Fernandes, S. D., Traumann, N. M., Streets, D. G., Roden, C. A., and Bond, T. C: Global biofuel use, 1850-2000, *Global Biogeochem. Cy.*, 21, DB2019, <https://doi.org/10.1029/2006GB002836>, 2007.
- Fu, X., Wang, S., Xing, J., Zhang, X., Wang, T., and Hao, J.: Increasing ammonia concentrations reduce the effectiveness of particle pollution control achieved via SO<sub>2</sub> and NO<sub>x</sub> emissions reduction in East China, *Environ. Sci. Technol. Lett.*, 4, 221-227, <https://doi.org/10.1021/acs.estlett.7b00143>, 2017.
- Gadi, R., Kulshrestha, U. C., Sarkar, A. K., Garg, S. C., and Parashar, D. C.: Emissions of SO<sub>2</sub> and NO<sub>x</sub> from biofuels in India, *Tellus*, 55B, 787–795, <https://doi.org/10.1034/j.1600-0889.2003.00065.x>, 2003.
- Gao, T., Shen, L., Shen, M., Liu, H., Chen, F., and Gao, L.: Evolution and projection of CO<sub>2</sub> emissions for China's cement industry from 1980 to 2020, 74, 522-537, <https://doi.org/10.1016/j.rser.2017.02.006>, 2017.
- Garg, A., Shukla, P. R., Bhattacharya, S., and Dadhwal, V. K.: Subregion (district) and sector level SO<sub>2</sub> and NO<sub>x</sub> emissions for India: assessment of inventories and mitigation flexibility, *Atmos. Environ.*, 35, 703–713, [https://doi.org/10.1016/S1352-2310\(00\)00316-2](https://doi.org/10.1016/S1352-2310(00)00316-2), 2001.
- Goto (1981): Progress of non-ferrous metal smelting in recent 10 years (in Japanese), *J. Jpn. Mining Ind. Assoc.*, 97, 1122, [https://doi.org/10.2473/shigentosozai1953.97.1122\\_602](https://doi.org/10.2473/shigentosozai1953.97.1122_602), 1981.
- Guan, D., Liu, Z., Geng, Y., Lindner, S., and Hubacek, K.: The gigatonne gap in China's carbon

- dioxide inventories, *Nature Clim. Change*, 2, 672-675, <https://doi.org/10.1038/nclimate1560>, 2012.
- Guttikunda, S. K. and Jawahar, P.: Atmospheric emissions and pollution from the coal-fired thermal power plants in India, *Atmos. Environ.*, 92, 449–460, <https://doi.org/10.1016/j.atmosenv.2014.04.057>, 2014.
- Hammond, A. and Matthews, E.: Critical consumption trends and implications, *Degrading Earth's Ecosystems*, World Resources Institute 1999.
- He, K., Huo, H., Zhang, Q., He, D., An, F., Wang, M., and Walsh, M. P.: Oil consumption and CO<sub>2</sub> emissions in China's road transport: current status, future trends, and policy implications, *Energy Policy*, 33, 1499-1507, <https://doi.org/10.1016/j.enpol.2004.01.007>, 2005.
- Hiragushi: Development of Refractories Technology for Iron and Steel Industry in Japan, Center of the History of Japan Industrial Technology, 2009.
- Hua, S., Tian, H., Wang, K., Zhu, C., Gao, J., Ma, Y., Xue, Y., Wang, Y., Duan, S., and Zhou, J.: atmospheric emission inventory of hazardous air pollutants from China's cement plants: Temporal trends, spatial variation characteristics and scenario projections, *Atmos. Environ.*, 128, 1-9, <https://doi.org/10.1016/j.atmosenv.2015.12.056>, 2016.
- Huang, C., Chen, C. H., Li, L., Cheng, Z., Wang, H. L., Huang, H. Y., Streets, D. G., Wang, Y. J., Zhang, G. F., and Chen, Y. R.: Emission inventory of anthropogenic air pollutants and VOC species in the Yangtze River Delta region, China, *Atmos. Chem. Phys.*, 11, 4105–4120, doi:10.5194/acp-11-4105-2011, 2011.
- Huo, H., Lei, Y., Zhang, Q., Zhao, L., and He, K.: China's coke industry: Recent policies, technology shift, and implication for energy and the environment, *Energy Policy*, 51, 397-404, <https://doi.org/10.1016/j.enpol.2012.08.041>, 2012a.
- Huo, H., Zhang, Q., He, K., Yao, Z., and Wang, M.: Vehicle-use intensity in China: Current status and future trend, *Energy Policy*, 43, 6-16, <https://doi.org/10.1016/j.enpol.2011.09.019>, 2012b.
- Huo, H., Yao, Z., Zhang, Y., Xianbao, S., Zhang, Q., and He, K.: On-board measurements of emissions from diesel trucks in five cities in China, *Atmos. Environ.*, 54, 159-167, <https://doi.org/10.1016/j.atmosenv.2012.01.068>, 2012c.
- IEA (International Energy Agency): *World Energy Balances*, IEA, Paris, 2017.
- Imura, H., Kobayashi, S., Togawa, K., Matsumoto, T., Nogami, K., Kaneko, S., Hujikura, R., Nakayama, H., and Fujiwara, K.: Urbanization and environmental problems (in Japanese), Working Paper Series, 99, The International Centre for the Study of East Asian Development, 1999.
- Indiastat: Datanet India Pvt. Ltd., <https://www.indiastat.com>
- IPCC (Intergovernmental Panel on Climate Change): Revised 1996 IPCC guidelines for national greenhouse gas inventories, edited by: Houghton, J. T., Meira Filho, L. G., Lim, B., Treanton,

- K., et al., IPCC WGI Technical Support Unit, Bracknell, UK, 1997.
- IPCC, the National Greenhouse Gas Inventories Programme, Eggleston, H. S., Buendia, L., Miwa, K., Ngara, T., and Tanabe, K. (eds.): 2006 IPCC Guidelines for National Greenhouse Gas Inventories, published by the Institute for Global Environmental Strategies (IGES), Hayama, Japan on behalf of the IPCC, available at: <http://www.ipcc-nggip.iges.or.jp/public/2006gl/index.html> (last access: 9 August 2020), 2006.
- IRF (International Road Federation): World Road Statistics 1963–2015, International Road Federation, Geneva, 1990–2018.
- Iwaya, M: Roles of thermal power generation in electric power industry (in Japanese), Energy and Environment Symposium of The University of Tokyo, 2013.
- Jang, Y.-K., Kim, J., Kim, P.-S., Shin, Y.-I., Kim, W.-S., and Choi, Y.-J.: Estimation of vehicle kilometers travelled and air pollution emission from motorcycles, J. Korean Soc. for Atmos. Environ., 26, 48-56, <https://doi.org/10.5572/KOSAE.2010.26.1.048>, 2010.
- Janssens-Maenhout, G., Crippa, M., Guizzardi, D., Dentener, F., Muntean, M., Pouliot, G., Keating, T., Zhang, Q., Kurokawa, J., Wankmüller, R., Denier van der Gon, H., Kuenen, J. J. P., Klimont, Z., Frost, G., Darras, S., Koffi, B., and Li, M.: HTAP\_v2.2: a mosaic of regional and global emission grid maps for 2008 and 2010 to study hemispheric transport of air pollution, Atmos. Chem. Phys., 15, 11411–11432, <https://doi.org/10.5194/acp-15-11411-2015>, 2015.
- Japan Cement Association, Japan: Cement handbook, ISBN978-4-88175-156-5 C0060, 2019.
- Japan Environmental Sanitation Center and Suuri Keikaku: Report for prevention of air pollution in East Asia Annex I: Emission inventory in Vietnam and policy analysis for prevention of air pollution (in Japanese), 2011.
- Japan Statistical Association: Historical Statistics of Japan New Edition Volume 3, Statistics Bureau, Ministry of Internal Affairs and Communications, 2006.
- JOGMEC (Japan Oil, Gas and Metal National Cooperation): Trends of global mining industry (2002-2003) (in Japanese), JOGMEC Metals Strategy Department, Research Division, 2002-2003.
- JPEC (Japan Petroleum Energy Center): Emission inventory of road transport in Japan, JPEC Technical Report (in Japanese), JPEC- 2011AQ-02-06, 136 pp., 2012a.
- JPEC: Emission inventory of sources other than road transport in Japan, JPEC Technical Report (in Japanese), JPEC-2011AQ-02-07, 288 pp., 2012b.
- JPEC: Speciation profiles of VOC, PM, and NO<sub>x</sub> emissions for atmospheric simulations of PM<sub>2.5</sub>, JPEC Technical Report (in Japanese), JPEC-2011AQ-02-08, 69 pp., 2012c.
- JPEC: Emission inventory of PM<sub>2.5</sub> and profiles of emission sources, Report of Ministry of Environment of Japan, 2014.
- JMF (The Japan Machinery Federation) and ICETT (International Center for Environmental

- Technology Transfer): Report of environmental problem and technology transfer in East Asian region (in Japanese), pp182, 2003.
- Kanamori, Y. and Hijioka, Y.: Development of an estimation method of residential water use by purpose estimation and its application to Asian countries (in Japanese), *J. Soc. Environ. Sci. Jpn.*, 26, 266-277, <https://doi.org/10.11353/sesj.26.266>, 2013.
- Kannari, A., Baba, T., and Hayami, H.: Estimation of ammonia emissions in Japan (in Japan), *J. Jpn. Soc. Atmos. Environ.*, 36, 29-38, <https://doi.org/10.11298/taiki1995.36.29>, 2001.
- Kato, N., Ogawa, Y., Koike, T., Sakamoto, T., and Sakamoto, S.: Analysis of the structure of energy consumption and the dynamics of emissions of atmospheric species related to the global environmental change (SO<sub>2</sub>, NO<sub>x</sub> & CO<sub>2</sub>) in Asia (in Japanese), NISTEP Report No. 21, National Institute of Science and Technology Policy, Japan, 1991.
- Kato, N. and Akimoto, H.: Anthropogenic emissions of SO<sub>2</sub> and NO<sub>x</sub> in Asia: emissions inventories, *Atmos. Environ.*, 26, 2997–3017, [https://doi.org/10.1016/0960-1686\(92\)90291-R](https://doi.org/10.1016/0960-1686(92)90291-R), 1992.
- Khan, M. I., and Yasmin, Y.: Development of natural gas as a vehicular fuel in Pakistan: Issues and prospects, *J. N. J. Nat. Gas Sci. Eng.*, 17, 99-109, <https://doi.org/10.1016/j.jngse.2014.01.006>, 2014.
- Klein Goldewijk, K., Beusen, A., Doelman, J., and Stehfest, E.: Anthropogenic land use estimates for the Holocene – HYDE 3.2, *Earth Syst. Sci. Data*, 9, 927–953, <https://doi.org/10.5194/essd-9-927-2017>, 2017.
- Klimont, Z., Streets, D. G., Gupta, S., Cofala, J., Lixin, F., and Ichikawa, Y.: Anthropogenic emissions of non-methane volatile organic compounds in China, *Atmos. Environ.*, 36, 1309-1322, [https://doi.org/10.1016/S1352-2310\(01\)00529-5](https://doi.org/10.1016/S1352-2310(01)00529-5), 2002a.
- Klimont, Z., Cofala, J., Bertok, I., Amann, M., Heyes, C., and Gyarmas, F.: Modeling particulate emissions in Europe: A framework to estimate reduction potential and control costs, IIASA, Interim Report IR-02-076, 2002b.
- Klimont, Z., Kupiainen, K., Heyes, C., Purohit, P., Cofala, J., Rafaj, P., Borken-Kleefeld, J., and Schöpp, W.: Global anthropogenic emissions of particulate matter including black carbon, *Atmos. Chem. Phys.*, 17, 8681–8723, <https://doi.org/10.5194/acp-17-8681-2017>, 2017.
- Kupiainen, K. and Klimont, Z.: Primary emissions of submicron and carbonaceous particles in Europe and the potential for their control, IIASA, Interim Report IR-04-079, 2004.
- Kurokawa, J., Ohara, T., Morikawa, T., Hanayama, S., Janssens-Maenhout, G., Fukui, T., Kawashima, K., and Akimoto, H.: Emissions of air pollutants and greenhouse gases over Asian regions during 2000–2008: Regional Emission inventory in ASia (REAS) version 2, *Atmos. Chem. Phys.*, 13, 11019–11058, <https://doi.org/10.5194/acp-13-11019-2013>, 2013.
- Kurokawa, J. and Ohara, T.: Long-term historical trends in air pollutant emissions in Asia: Regional Emission inventory in ASia (REAS) version 3.1, *Atmos. Chem. Phys. Discuss.*,

- <https://doi.org/10.5194/acp-2019-1122>, 2019.
- Lei, Y., Zhang, Q., Nielsen, C., and He, K.: An inventory of primary air pollutants and CO<sub>2</sub> emissions from cement production in China, 1990–2020, *Atmos. Environ.*, 45, 147–154, <https://doi.org/10.1016/j.atmosenv.2010.09.034>, 2011a.
- Lei, Y., Zhang, Q., He, K. B., and Streets, D. G.: Primary anthropogenic aerosol emission trends for China, 1990–2005, *Atmos. Chem. Phys.*, 11, 931–954, <https://doi.org/10.5194/acp-11-931-2011>, 2011b.
- Li, M., Liu, H., Geng, G., Hong, C., Liu, F., Song, Y., Tong, D., Zheng, B., Cui, H., Man, H., Zhang, Q., and He, K.: Anthropogenic emission inventories in China: a review, *National Science Review*, 4, 834–866, <https://doi.org/10.1093/nsr/nwx150>, 2017.
- Li, Z. D. and Dai, Y. D.: Comparative analysis on measures against sulfur oxides pollution (in Japanese), *IEEJ Energy Journal*, 26, 2–20, 2000.
- Liu, F., Zhang, Q., Tong, D., Zheng, B., Li, M., Huo, H., and He, K. B.: High-resolution inventory of technologies, activities, and emissions of coal-fired power plants in China from 1990 to 2010, *Atmos. Chem. Phys.*, 15, 13299–13317, <https://doi.org/10.5194/acp-15-13299-2015>, 2015.
- Lu, Z., Streets, D. G., Zhang, Q., Wang, S., Carmichael, G. R., Cheng, Y. F., Wei, C., Chin, M., Diehl, T., and Tan, Q.: Sulfur dioxide emissions in China and sulfur trends in East Asia since 2000, *Atmos. Chem. Phys.*, 10, 6311–6331, <https://doi.org/10.5194/acp-10-6311-2010>, 2010.
- Maithel, S., Lalchandani, D., Malhotra, G., Bhanware, P., Uma, R., Ragavan, S., Athalye, V., Bindiy, K. R., Reddy, S., Bond, T., Weyant, C., Baum, E., Kim Thoa, V. T., Thu Phuong, N., and Kim Thanh, T.: Brick Kilns performance assessment, Shakti Sustainable Energy Foundation and Climate Works Foundation, 2012.
- Maithel, S.: Evaluating energy conservation potential of brick production in India, Greentech Knowledge Solutions Pvt Ltd., New Delhi, 2013.
- Malla, S.: Assessment of mobility and its impact on energy use and air pollution in Nepal, *Energy*, 69, 485–496, <https://doi.org/10.1016/j.energy.2014.03.041>, 2014.
- Manh, V. V., Thuy, B. P., and Duy, D. H.: Emission Inventory and Predict from Road Traffic Sources for Hanoi, *Innovations in Sharing Environmental Observations and Information*, ISBN: 978-3-8440-0451-9, 2011.
- Marland, G. T., Boden, T. G., and Andres, R. J.: Global, Regional, and National Fossil Fuel CO<sub>2</sub> Emissions, <https://cdiac.ess-dive.lbl.gov/trends/emis/overview.html> (last access: 9 August 2020), 2008.
- METI (Ministry of Economy Trade and Industry of Japan): Reports of Pollutants Release and Transfer Register (2001–2015) (in Japanese), Chemical Management Policy Division, 2003–2017.
- Mishra, D. and Goyal, P.: Estimation of vehicular emissions using dynamic emission factors: A case

- study of Delhi, India, *Atmos. Environ.*, 98, 1–7, <https://doi.org/10.1016/j.atmosenv.2014.08.047>, 2014.
- Mitchell, B. R.: *International historical statistics, Africa, Asia & Oceania, 1750-1993* 3rd ed., Macmillan reference Ltd., 1998.
- Mizuochi, M.: *Decentralized wastewater treatment techniques for reduction of ammonium nitrogen, International seminar for reduction of total water pollution in Japan and China, Beijing, China, 2012.*
- MLTI (Ministry of Land, Infrastructure, Transport and Tourism of Japan): *Annual Report of Road Statistics (1960–2015)* (in Japanese), Information Policy Division, 1961–2016.
- MOEJ (Ministry of the Environment, Japan): *Report of status of stationary sources related to atmospheric environment* (in Japanese), <https://www.env.go.jp/air/osen/kotei/> (last access: 9 August 2020), 2000.
- MOEJ: *Research report for methodology of estimation of greenhouse gas emissions* (in Japanese), <https://www.env.go.jp/earth/ondanka/ghg-mrv/committee/h24/> (last access: 9 August 2020), 2012.
- MOEJ (Ministry of Environment of Japan): *Report on Volatile Organic Compound (VOC) Emission Inventory Compiled* (in Japanese), available at: <http://www.env.go.jp/air/osen/voc/inventory.html> (last access: 9 August 2020), 2017a.
- MOEJ (Ministry of Environment of Japan): *Waste treatment in Japan* (in Japanese), Waste Management and Recycling Department, 2017b.
- MRI (Mitsubishi Research Institute): *Survey report for technologies used to overcome industrial air pollution in Japan* (in Japanese), 2015.
- National Bureau of Statistics of China: *China Energy Statistical Yearbook (1985; 1995–2015)*, China Statistics Press, Beijing, 1986; 2001–2017.
- National Bureau of Statistics of China: *China Industrial Economy Statistics Yearbook (2005–2006)*, China Statistics Press, Beijing, 2006–2007.
- National Bureau of Statistics of China: *China Statistical Yearbook (1985–2015)*, China Statistics Press, Beijing, 1986–2016.
- NILIM (National Institute for Land and Infrastructure Management): *Estimation methodology of emission factors for road vehicles used for assessment of road site environment etc.* (in Japanese), Technical note of National Institute for Land and Infrastructure Management, 671, ISSN 1346-7328, 2012.
- Nishina, K., Ito, A., Hanasaki, N., and Hayashi, S.: *Reconstruction of spatially detailed global map of  $\text{NH}_4^+$  and  $\text{NO}_3^-$  application in synthetic nitrogen fertilizer*, *Earth Syst. Sci. Data*, 9, 149–162, <https://doi.org/10.5194/essd-9-149-2017>, 2017.
- Niyati, M.: *A comparative study of municipal solid waste management in India and Japan*, The

- Waseda J. of Soc. Sci, 25, 48-61, <http://hdl.handle.net/2065/45146/> (last access: 9 August 2020), 2015.
- Ohara, T., Akimoto, H., Kurokawa, J., Horii, N., Yamaji, K., Yan, X., and Hayasaka, T.: An Asian emission inventory of anthropogenic emission sources for the period 1980–2020, *Atmos. Chem. Phys.*, 7, 4419–4444, <https://doi.org/10.5194/acp-7-4419-2007>, 2007.
- Pandey, A., Sadavarte, P., Rao, A. B., and Venkataraman, C.: Trends in multi-pollutant emissions from a technology-linked inventory for India: II. Residential, agricultural and informal industry sectors, 99, 341–352, <https://doi.org/10.1016/j.atmosenv.2014.09.080>, 2014.
- Pandey, A. and Venkataraman, C.: Estimating emissions from the Indian transport sector with on-road fleet composition and traffic volume, *Atmos. Environ.*, 98, 123–133, <https://doi.org/10.1016/j.atmosenv.2014.08.039>, 2014.
- Permadi, D. A., Sofyan, A., and Oanh, N. T. K.: Assessment of emissions of greenhouse gases and air pollutants in Indonesia and impacts of national policy for elimination of kerosene use in cooking, *Atmos. Environ.*, 154, 82-94, <https://doi.org/10.1016/j.atmosenv.2017.01.041>, 2017.
- Platts: The UDI World Electric Power Plants Database, S & P Global Platts, 2018.
- Prakash, J. and Habib, G.: A technology-based mass emission factors of gases and aerosol precursor and spatial distribution of emissions from on-road transport sector in India, *Atmos. Environ.*, 180, 192–205, <https://doi.org/10.1016/j.atmosenv.2018.02.053>, 2018.
- Reddy, M. S. and Venkataraman, C.: Inventory of aerosol and sulphur dioxide emissions from India: I – Fossil fuel combustion, *Atmos. Environ.*, 36, 677–697, [https://doi.org/10.1016/S1352-2310\(01\)00463-0](https://doi.org/10.1016/S1352-2310(01)00463-0), 2002.
- Sadavarte, P. and Venkataraman, C.: Trends in multi-pollutant emissions from a technology-linked inventory for India: I. Industry and transport sectors, *Atmos. Environ.*, 99, 353–364, <https://doi.org/10.1016/j.atmosenv.2014.09.081>, 2014.
- Sahu, S. K., Beig, G., and Parkhi, N.: Critical emissions from the largest on-road transport network in South Asia, *Aerosol Air Qual. Res.*, 14, 135–144, <https://doi.org/10.4209/aaqr.2013.04.0137>, 2014.
- Sharma, S., Goel, A., Gupta, D., Kumar, A., Mishra, A., Kundu, S., Chatani, S., and Klimont, Z.: Emission inventory of non-methane volatile organic compounds from anthropogenic sources in India, *Atmos. Environ.*, 102, 209–219, <https://doi.org/10.1016/j.atmosenv.2014.11.070>, 2015.
- Shimoda: History of Cement Manufacturing Technology (in Japanese), Report of National Museum of Nature and Science for systemization of technologies, 23, 1–115, 2016.
- Shragge, A. and An, H. J.: Korea's Volume-based Waste Fee System: A Case Study for Presentation in the Classroom, Ministry of Strategy and Finance, Republic of Korea, 2014.
- Shrestha, R. M., Kim Oanh, N. T., Shrestha, R. P., Rupakheti, M., Rajbhandari, S., Permadi, D. A., Kanabkaew, T., and Iyengararasan, M.: Atmospheric Brown Clouds (ABC) Emission Inventory

- Manual, United Nations Environment Programme, Nairobi, Kenya, 2013.
- SEI (Stockholm Environment Institute): The Global Atmospheric Pollution Forum Air Pollutant Emission Inventory Manual, 2012.
- State Administration for Coal Safety: China Coal Industry Yearbook 2002, Coal Industry Publishing House, 2003.
- Statistical Bureau (Ministry of Internal Affairs and Communications): Japan Statistical Yearbook, Japan Statistical Association, 2010-2018.
- Streets, D. G. and Waldhoff, S. T.: Biofuel use in Asia and acidifying emissions, *Energy*, 23, 1029-1042, [https://doi.org/10.1016/S0360-5442\(98\)00033-4](https://doi.org/10.1016/S0360-5442(98)00033-4), 1998.
- Streets, D. G., and Waldhoff, T.: Greenhouse-gas emissions from biofuel combustion in Asia, *Energy*, 24, 841-855, [https://doi.org/10.1016/S0360-5442\(99\)00030-4](https://doi.org/10.1016/S0360-5442(99)00030-4), 1999.
- Streets, D. G., Tsai, N. Y., Akimoto, H., and Oka, K.: Sulfur oxide emissions in Asia in the period 1985-1997, *Atmos. Environ.*, 32, 4413-4424, [https://doi.org/10.1016/S1352-2310\(00\)00187-4](https://doi.org/10.1016/S1352-2310(00)00187-4), 2000.
- Streets, D. G., Bond, T. C., Carmichael, G. R., Fernandes, S. D., Fu, Q., He, D., Klimont, Z., Nelson, S. M., Tsai, N. Y., Wang, M. Q., Woo, J.-H., and Yarber, K. F.: An inventory of gaseous and primary aerosol emissions in Asia in the year 2000, *J. Geophys. Res.*, 108, 8809, doi:10.1029/2002JD003093, 2003.
- Streets, D. G., Zhang, Q., Wang, L., He, K., Hao, J., Wu, Y., Tang, Y., and Carmichael, G. R.: Revisiting China's CO emissions after the Transport and Chemical Evolution over the Pacific (TRACE-P) mission: Synthesis of inventories, atmospheric modeling, and observations, *J. Geophys. Res.*, 111, D14306, <https://doi.org/10.1029/2006JD007118>, 2006.
- Suzuki: Combustion technology in steel industry (in Japanese), *Iron and Steel*, 6, 807-816, [https://doi.org/10.2355/tetsutohagane1955.76.6\\_807](https://doi.org/10.2355/tetsutohagane1955.76.6_807), 1990.
- Thao Pham, T. B., Manomaiphiboon, K., and Vongmahadlek, C.: Development of an inventory and temporal allocation profiles of emissions from power plants and industrial facilities in Thailand, *Sci. Total Environ.*, 397, 103–118, <https://doi.org/10.1016/j.scitotenv.2008.01.066>, 2008.
- TERI (The Energy Resources Institute): TERI Energy & Environment Data Diary and Yearbook (2012/13; 2016/17), New Delhi, TERI, 2013; 2018.
- TOZAI BOHEKI TSUSHINSHA: Petroleum and petrochemical industry in East Asia (in Japanese), editorial department of Tozai Boeki Tsushinsha, 2014a.
- TOZAI BOHEKI TSUSHINSHA: Petroleum and petrochemical industry in China (in Japanese), editorial department of Tozai Boeki Tsushinsha, 2014b.
- UN (United Nations): Energy Statistics Database, United Nations Statistics Division, New York, 2016.
- UN: World Urbanization Prospects, The 2018 Revision, Online Edition, Department of Economic

- and Social Affairs, Population Division, 2018.
- UN Environment: Asia waste management outlook, UN Environment International Environment Technology Centre, 2017.
- UN Environment: Reducing mercury emission from coal combustion in the energy sector in Thailand, A UN Environment Report, 2018.
- US EPA (United States Environmental Protection Agency): Compilation of air pollutant emission factors (AP-42) Volume 1: Stationary point and area sources, United States Environmental Protection Agency, Research Triangle Park, NC, 1995.
- USGS (United States Geological Survey): Minerals Yearbook, National Minerals Information Center, USGS, <https://www.usgs.gov/centers/nmic/> (last access: 9 August 2020).
- Vallack, H. and Rypdal, K.: The Global Atmospheric Pollution Forum Air Pollution Emission Inventory Manual version 5.0, 2012.
- Vroomen, H.: The History of Ammonia to 2012, The Fertilizer Institute, 2013.
- Wadud, Z., and Khan, T.: CNG Conversion of Motor Vehicles in Dhaka: Valuation of the Co-benefits, Transportation Research Board 90<sup>th</sup> Annual Meeting, Washington, D. C., 2011.
- Wang, R., Tao, S., Wang, W., Liu, J., Shen, H., Shen, G., Wang, B., Liu, X., Li, W., Huang, Y., Zhang, Y., Lu, Y., Chen, H., Chen, Y., Wang, C., Zhu, D., Wang, X., Li, B., Liu, X., and Ma, J.: Black Carbon Emissions in China from 1949 to 2050, *Environ. Sci. Technol.*, 46, 7595-7603, <https://doi.org/10.1021/es3003684>, 2012.
- Wang, S. and Hao, J.: Air quality management in China: Issues, challenges, and options, *J. Environ. Sci.*, 24, 1, 2-13, [https://doi.org/10.1016/S1001-0742\(11\)60724-9](https://doi.org/10.1016/S1001-0742(11)60724-9), 2012.
- Wang, S. X., Zhao, B., Cai, S. Y., Klimont, Z., Nielsen, C. P., Morikawa, T., Woo, J. H., Kim, Y., Fu, X., Xu, J. Y., Hao, J. M., and He, K. B.: Emission trends and mitigation options for air pollutants in East Asia, *Atmos. Chem. Phys.*, 14, 6571–6603, <https://doi.org/10.5194/acp-14-6571-2014>, 2014.
- Wei, W., Wang, S., Chatani, S., Klimont, Z., Cofala, J., and Hao, J.: Emission and speciation of non-methane volatile organic compounds from anthropogenic sources in China, *Atmos. Environ.*, 42, 4976-4988, <https://doi.org/10.1016/j.atmosenv.2008.02.044>, 2008.
- Wei, W., Wang, S., Hao, J., and Cheng, S.: Projection of anthropogenic volatile organic compounds (VOCs) emissions in China for the period 2010–2020, *Atmos. Environ.*, 45, 6863–6871, <https://doi.org/10.1016/j.atmosenv.2011.01.013>, 2011.
- Weyant, C., Athalye, V., Ragavan, S., Rajaratnam, U., Lalchandani, D., Maithel, S., Baum, E., and Bond, T. C.: Emissions from South Asian brick production, *Environ. Sci. Technol.*, 48, 6477-6483, <https://doi.org/10.1021/es500186g>, 2014.
- Wheeler, D. and Ummel, K: Calculating CARMA: Global estimation of CO<sub>2</sub> emissions from the power sector, Center for Global Development, Working Paper 145, 2008.

- Wu, Y., Wang, R., Zhou, Y., Lin, B., Fu, L., He, K., and Hao, J.: On-road vehicle emission control in Beijing: Past, present, and future, *Environ. Sci. Technol.*, 45, 147-153, <https://doi.org/10.1021/es1014289>, 2011.
- Wu, R., Bo, Y., Li, J., Li, L., Li, Y., and Xie, S.: Method to establish the emission inventory of anthropogenic volatile organic compounds in China and its application in the period 2008–2012, *Atmos. Environ.*, 127, 244-254, <https://doi.org/10.1016/j.atmosenv.2015.12.015>, 2016.
- Wu, Q., Gao, W., Wang, S., and Hao, J.: Updated atmospheric speciated mercury emissions from iron and steel production in China during 2000–2015, *Atmos. Chem. Phys.*, 17, 10423–10433, <https://doi.org/10.5194/acp-17-10423-2017>, 2017.
- Xia, Y., Zhao, Y., and Nielsen, C. P.: Benefits of China's efforts in gaseous pollutant control indicated by the bottom-up emissions and satellite observations 2000–2014, 136, 43–53, <https://doi.org/10.1016/j.atmosenv.2016.04.013>, 2016.
- Xu, P., Zhang, Y., Gong, W., Hou, X., Kroeze, C., Gao, W., and Luan, S.: An inventory of the emission of ammonia from agricultural fertilizer application in China for 2010 and its high-resolution spatial distribution, *Atmos. Environ.*, 115, 141-148, <https://doi.org/10.1016/j.atmosenv.2015.05.020>, 2015.
- Xu, P., Liao, Y. J., Lin, Y. H., Zhao, C. X., Yan, C. H., Cao, M. N., Wang, G. S., and Luan, S. J.: High-resolution inventory of ammonia emissions from agricultural fertilizer in China from 1978 to 2008, *Atmos. Chem. Phys.*, 16, 1207–1218, <https://doi.org/10.5194/acp-16-1207-2016>, 2016.
- Yamaji, K., Ohara, T., and Akimoto, H.: Regional-specific emission inventory for NH<sub>3</sub>, N<sub>2</sub>O, and CH<sub>4</sub> via animal farming in South, Southeast, and East Asia, *Atmos. Environ.*, 38, 7111–7121, <https://doi.org/10.1016/j.atmosenv.2004.06.045>, 2004.
- Yan, X., Akimoto, H., and Ohara, T.: Estimation of nitrous oxide, nitric oxide, and ammonia emissions from croplands in 1085 East, Southeast, and South Asia, *Global Change Biol.*, 9, 1080–1096, <https://doi.org/10.1046/j.1365-2486.2003.00649.x>, 2003.
- Yan, X. and Crookes, R. J.: Reduction potentials of energy demand and GHG emissions in China's road transport sector, *Energy Policy*, 37, 658-668, <https://doi.org/10.1016/j.enpol.2008.10.008>, 2009.
- Zhao, Y., Wang, S., Duan, L., Lei, Y., Cao, P., and Hao, J.: Primary air pollutant emissions of coal-fired power plants in China: Current status and future prediction, *Atmos. Environ.*, 42, 8442-8452, <https://doi.org/10.1016/j.atmosenv.2008.08.021>, 2008.
- Zhao, Y., Nielsen, C. P., McElroy, M. B., Zhang, L., and Zhang, J.: CO emissions in China: uncertainties and implications of improved energy efficiency and emission control, *Atmos. Environ.*, 49, 103–113, <https://doi.org/10.1016/j.atmosenv.2011.12.015>, 2012.
- Zhao, Y., Zhang, J., and Nielsen, C. P.: The effects of energy paths and emission controls and

- standards on future trends in China's emissions of primary air pollutants, *Atmos. Chem. Phys.*, 14, 8849–8868, <https://doi.org/10.5194/acp-14-8849-2014>, 2014.
- Zhang Z.: Energy efficiency and environmental pollution of brickmaking in China, *Energy*, 22, 33–42, [https://doi.org/10.1016/S0360-5442\(96\)00078-3](https://doi.org/10.1016/S0360-5442(96)00078-3), 1997.
- Zhang, Q., Streets, D. G., He, K., Wang, Y., Richter, A., Burrows, J. P., Uno, I., Jang, C. J., Chen, D., Yao, Z., and Lei, Y.: NO<sub>x</sub> emission trends for China, 1995–2004: The view from the ground and the view from space, *J. Geophys. Res.*, 112, D22306, <https://doi.org/10.1029/2007JD008684>, 2007.
- Zhang, S., Wu, Y., Liu, H., Wu, X., Zhou, Y., Yao, Z., Fu, L., He, K., and Hao, J.: Historical evaluation of vehicle emission control in Guangzhou based on a multi-year emission inventory, *Atmos. Environ.*, 76, 32–42, <https://doi.org/10.1016/j.atmosenv.2012.11.047>, 2013.
- Zhang, S., Wu, Y., Huang, R., Wang, J., Yan, H., Zheng, Y., and Hao, J.: High-resolution simulation of link-level vehicle emissions and concentrations for air pollutants in a traffic-populated eastern Asian city, *Atmos. Chem. Phys.*, 16, 9965–9981, <https://doi.org/10.5194/acp-16-9965-2016>, 2016.
- Zheng, C., Chen, J., Zhang, Y., Huang, W., Zhu, X., Wu, X., Chen, L., Gao, X., and Cen, K.: Quantitative assessment of industrial VOC emissions in China: Historical trend, spatial distribution, uncertainties, and projection, *Atmos. Environ.*, 150, 116–125, <https://doi.org/10.1016/j.atmosenv.2016.11.023>, 2017.
- Zheng, B., Tong, D., Li, M., Liu, F., Hong, C., Geng, G., Li, H., Li, X., Peng, L., Qi, J., Yan, L., Zhang, Y., Zhao, H., Zheng, Y., He, K., and Zhang, Q.: Trends in China's anthropogenic emissions since 2010 as the consequence of clean air actions, *Atmos. Chem. Phys.*, 18, 14095–14111, <https://doi.org/10.5194/acp-18-14095-2018>, 2018.
- Zhu, C., Tian, H., Hao, Y., Gao, J., Hao, J., Wang, Y., Hua, S., Wang, K., and Liu, H.: A high-resolution emission inventory of anthropogenic trace elements in Beijing-Tianjin-Hebei (BTH) region of China, *Atmos. Environ.*, 191, 452–462, <https://doi.org/10.1016/j.atmosenv.2018.08.035>, 2018.
