# Supplementary material for: Long-term historical trends in air pollutant emissions in Asia: Regional Emission inventory in ASia (REAS) version 3
Source: Copernicus journal article supplement (doi:10.5194/acp-20-12761-2020), 2020-11-04
Supplement: Supplementary file 1 [file acp-20-12761-2020-supplement.zip › Kurokawa_and_Ohara_Supplement/Kurokawa_and_Ohara_Supplement_Tables.pdf]

## *Supplement of*

# **Long-term historical trends in air pollutant emissions in Asia: Regional Emission inventory in ASia (REAS) version 3**

**Junichi Kurokawa and Toshimasa Ohara**

5 *Correspondence to:* Junichi Kurokawa (kurokawa@acap.asia)

## **Supplementary tables**

**Table S1** shows uncertainties of emissions of SO<sub>2</sub>, NO<sub>x</sub>, CO, CO<sub>2</sub>, PM<sub>10</sub>, PM<sub>2.5</sub>, BC, and OC for each sector in China, India,  
10 Japan, Southeast Asia (SEA), East Asia other than China and Japan (OEA), and South Asia other than India (OSA) in 1955,  
1985, and 2015. See Fig. 1 for the definitions of SEA, OEA, and OSA.

**Table S2** presents uncertainties of emissions of NMVOC for each sector in China, India, Japan, SEA, OEA, and OSA in  
1955, 1985, and 2015. See Fig. 1 for the definitions of SEA, OEA, and OSA.

**Table S3** provides uncertainties of emissions of NH<sub>3</sub> for each sector in China, India, Japan, SEA, OEA, and OSA in 1955,  
15 1985, and 2015. See Fig. 1 for the definitions of SEA, OEA, and OSA.

**Table S1.** Uncertainties [%] of emissions of SO<sub>2</sub>, NO<sub>x</sub>, CO, CO<sub>2</sub>, PM<sub>10</sub>, PM<sub>2.5</sub>, BC, and OC for each sector in China, India, Japan, SEA, OEA, and OSA in (a) 1955, (b) 1985, and (c) 2015. Abbreviations for sectors are as follows: PP = Power Plants, IND = Industry, ROAD = Road transport, OTRA = Other transport, and DOM = Domestic. For OTRA of OEA in 1955, no emissions were estimated. See Fig. 1 for the definitions of SEA, OEA, and OSA.

(a) 1955

|       | SO <sub>2</sub> | NO <sub>x</sub> | CO   | CO <sub>2</sub> | PM <sub>10</sub> | PM <sub>2.5</sub> | BC   | OC   |
|-------|-----------------|-----------------|------|-----------------|------------------|-------------------|------|------|
| China |                 |                 |      |                 |                  |                   |      |      |
| PP    | ±115            | ±125            | ±180 | ±97             | ±163             | ±163              | ±148 | ±163 |
| IND   | ±117            | ±153            | ±177 | ±91             | ±127             | ±126              | ±187 | ±177 |
| ROAD  | ±73             | ±102            | ±91  | ±53             | ±128             | ±129              | ±131 | ±124 |
| OTRA  | ±130            | ±163            | ±200 | ±103            | ±182             | ±182              | ±182 | ±182 |
| DOM   | ±170            | ±303            | ±316 | ±168            | ±361             | ±365              | ±359 | ±370 |
| India |                 |                 |      |                 |                  |                   |      |      |
| PP    | ±93             | ±117            | ±142 | ±83             | ±147             | ±152              | ±139 | ±153 |
| IND   | ±111            | ±171            | ±240 | ±137            | ±259             | ±283              | ±273 | ±323 |
| ROAD  | ±71             | ±97             | ±90  | ±52             | ±133             | ±134              | ±137 | ±129 |
| OTRA  | ±123            | ±131            | ±169 | ±96             | ±195             | ±184              | ±168 | ±138 |
| DOM   | ±249            | ±292            | ±305 | ±169            | ±370             | ±374              | ±368 | ±375 |
| Japan |                 |                 |      |                 |                  |                   |      |      |
| PP    | ±100            | ±129            | ±152 | ±84             | ±179             | ±177              | ±157 | ±161 |
| IND   | ±92             | ±128            | ±93  | ±79             | ±120             | ±132              | ±176 | ±163 |
| ROAD  | ±45             | ±49             | ±72  | ±25             | ±77              | ±77               | ±79  | ±77  |
| OTRA  | ±96             | ±121            | ±147 | ±94             | ±193             | ±178              | ±158 | ±122 |
| DOM   | ±92             | ±160            | ±234 | ±107            | ±256             | ±301              | ±308 | ±331 |
| SEA   |                 |                 |      |                 |                  |                   |      |      |
| PP    | ±114            | ±120            | ±147 | ±90             | ±165             | ±163              | ±140 | ±143 |
| IND   | ±164            | ±212            | ±271 | ±162            | ±294             | ±309              | ±315 | ±328 |
| ROAD  | ±70             | ±93             | ±116 | ±57             | ±129             | ±128              | ±131 | ±125 |
| OTRA  | ±130            | ±163            | ±200 | ±103            | ±200             | ±200              | ±200 | ±200 |
| DOM   | ±304            | ±294            | ±306 | ±164            | ±373             | ±375              | ±377 | ±374 |
| OEA   |                 |                 |      |                 |                  |                   |      |      |
| PP    | ±96             | ±138            | ±171 | ±97             | ±181             | ±180              | ±171 | ±163 |
| IND   | ±100            | ±131            | ±157 | ±87             | ±152             | ±153              | ±162 | ±171 |
| ROAD  | ±80             | ±135            | ±119 | ±64             | ±150             | ±152              | ±153 | ±147 |
| OTRA  | -               | -               | -    | -               | -                | -                 | -    | -    |
| DOM   | ±224            | ±202            | ±254 | ±106            | ±276             | ±304              | ±282 | ±319 |
| OSA   |                 |                 |      |                 |                  |                   |      |      |
| PP    | ±91             | ±108            | ±137 | ±76             | ±169             | ±164              | ±130 | ±144 |
| IND   | ±168            | ±203            | ±267 | ±142            | ±265             | ±296              | ±312 | ±327 |
| ROAD  | ±69             | ±85             | ±96  | ±54             | ±139             | ±142              | ±142 | ±136 |
| OTRA  | ±112            | ±144            | ±172 | ±86             | ±160             | ±160              | ±159 | ±162 |
| DOM   | ±292            | ±320            | ±327 | ±179            | ±383             | ±383              | ±383 | ±383 |

(b) 1985

|       | SO <sub>2</sub> | NO <sub>x</sub> | CO   | CO <sub>2</sub> | PM <sub>10</sub> | PM <sub>2.5</sub> | BC   | OC   |
|-------|-----------------|-----------------|------|-----------------|------------------|-------------------|------|------|
| China |                 |                 |      |                 |                  |                   |      |      |
| PP    | ±48             | ±62             | ±119 | ±37             | ±110             | ±109              | ±94  | ±108 |
| IND   | ±57             | ±93             | ±127 | ±37             | ±102             | ±94               | ±148 | ±144 |
| ROAD  | ±29             | ±69             | ±63  | ±17             | ±92              | ±93               | ±94  | ±89  |
| OTRA  | ±69             | ±116            | ±154 | ±49             | ±144             | ±144              | ±144 | ±144 |
| DOM   | ±81             | ±178            | ±231 | ±88             | ±255             | ±265              | ±250 | ±276 |
| India |                 |                 |      |                 |                  |                   |      |      |
| PP    | ±47             | ±75             | ±107 | ±37             | ±128             | ±129              | ±119 | ±91  |
| IND   | ±58             | ±96             | ±155 | ±61             | ±175             | ±194              | ±190 | ±260 |
| ROAD  | ±32             | ±76             | ±65  | ±18             | ±105             | ±106              | ±109 | ±100 |
| OTRA  | ±61             | ±80             | ±106 | ±39             | ±155             | ±132              | ±112 | ±103 |
| DOM   | ±152            | ±203            | ±247 | ±110            | ±307             | ±313              | ±303 | ±315 |
| Japan |                 |                 |      |                 |                  |                   |      |      |
| PP    | ±51             | ±69             | ±86  | ±19             | ±107             | ±103              | ±88  | ±142 |
| IND   | ±50             | ±78             | ±88  | ±26             | ±101             | ±112              | ±115 | ±146 |
| ROAD  | ±29             | ±38             | ±55  | ±22             | ±66              | ±66               | ±67  | ±66  |
| OTRA  | ±44             | ±120            | ±129 | ±27             | ±135             | ±135              | ±135 | ±135 |
| DOM   | ±45             | ±103            | ±119 | ±19             | ±110             | ±120              | ±133 | ±157 |
| SEA   |                 |                 |      |                 |                  |                   |      |      |
| PP    | ±55             | ±65             | ±105 | ±29             | ±125             | ±121              | ±102 | ±162 |
| IND   | ±64             | ±101            | ±202 | ±63             | ±167             | ±182              | ±222 | ±264 |
| ROAD  | ±30             | ±68             | ±86  | ±18             | ±87              | ±87               | ±90  | ±85  |
| OTRA  | ±70             | ±116            | ±154 | ±49             | ±154             | ±154              | ±154 | ±154 |
| DOM   | ±181            | ±195            | ±253 | ±107            | ±314             | ±317              | ±316 | ±317 |
| OEA   |                 |                 |      |                 |                  |                   |      |      |
| PP    | ±52             | ±75             | ±111 | ±37             | ±115             | ±114              | ±111 | ±95  |
| IND   | ±63             | ±91             | ±114 | ±39             | ±122             | ±125              | ±123 | ±132 |
| ROAD  | ±41             | ±111            | ±100 | ±23             | ±125             | ±127              | ±130 | ±122 |
| OTRA  | ±59             | ±116            | ±135 | ±44             | ±135             | ±135              | ±135 | ±135 |
| DOM   | ±84             | ±105            | ±134 | ±40             | ±163             | ±162              | ±161 | ±165 |
| OSA   |                 |                 |      |                 |                  |                   |      |      |
| PP    | ±56             | ±58             | ±81  | ±26             | ±102             | ±101              | ±88  | ±91  |
| IND   | ±55             | ±96             | ±184 | ±58             | ±169             | ±184              | ±203 | ±258 |
| ROAD  | ±32             | ±75             | ±83  | ±20             | ±110             | ±111              | ±112 | ±107 |
| OTRA  | ±53             | ±90             | ±115 | ±34             | ±105             | ±105              | ±105 | ±106 |
| DOM   | ±200            | ±233            | ±273 | ±120            | ±325             | ±325              | ±324 | ±326 |

|       | SO <sub>2</sub> | NO <sub>x</sub> | CO   | CO <sub>2</sub> | PM <sub>10</sub> | PM <sub>2.5</sub> | BC   | OC   |
|-------|-----------------|-----------------|------|-----------------|------------------|-------------------|------|------|
| China |                 |                 |      |                 |                  |                   |      |      |
| PP    | ±55             | ±65             | ±97  | ±34             | ±85              | ±85               | ±84  | ±81  |
| IND   | ±66             | ±71             | ±78  | ±28             | ±92              | ±95               | ±127 | ±127 |
| ROAD  | ±22             | ±41             | ±45  | ±15             | ±65              | ±65               | ±71  | ±60  |
| OTRA  | ±82             | ±94             | ±118 | ±35             | ±122             | ±116              | ±113 | ±116 |
| DOM   | ±71             | ±129            | ±204 | ±58             | ±235             | ±245              | ±227 | ±259 |
| India |                 |                 |      |                 |                  |                   |      |      |
| PP    | ±60             | ±55             | ±106 | ±32             | ±102             | ±101              | ±93  | ±189 |
| IND   | ±54             | ±74             | ±103 | ±37             | ±147             | ±160              | ±152 | ±241 |
| ROAD  | ±27             | ±54             | ±55  | ±13             | ±67              | ±68               | ±72  | ±63  |
| OTRA  | ±53             | ±103            | ±121 | ±35             | ±122             | ±122              | ±122 | ±122 |
| DOM   | ±130            | ±161            | ±230 | ±89             | ±289             | ±297              | ±286 | ±300 |
| Japan |                 |                 |      |                 |                  |                   |      |      |
| PP    | ±49             | ±57             | ±98  | ±23             | ±95              | ±97               | ±80  | ±131 |
| IND   | ±50             | ±68             | ±81  | ±23             | ±94              | ±100              | ±93  | ±136 |
| ROAD  | ±21             | ±27             | ±37  | ±13             | ±51              | ±51               | ±52  | ±51  |
| OTRA  | ±38             | ±109            | ±117 | ±19             | ±119             | ±120              | ±120 | ±121 |
| DOM   | ±47             | ±82             | ±111 | ±13             | ±107             | ±106              | ±116 | ±121 |
| SEA   |                 |                 |      |                 |                  |                   |      |      |
| PP    | ±70             | ±56             | ±96  | ±30             | ±111             | ±112              | ±105 | ±167 |
| IND   | ±59             | ±79             | ±155 | ±41             | ±149             | ±164              | ±194 | ±246 |
| ROAD  | ±28             | ±57             | ±78  | ±14             | ±70              | ±70               | ±72  | ±72  |
| OTRA  | ±53             | ±103            | ±122 | ±35             | ±122             | ±122              | ±122 | ±122 |
| DOM   | ±169            | ±158            | ±241 | ±89             | ±296             | ±300              | ±296 | ±302 |
| OEA   |                 |                 |      |                 |                  |                   |      |      |
| PP    | ±51             | ±47             | ±81  | ±26             | ±93              | ±90               | ±83  | ±80  |
| IND   | ±65             | ±82             | ±109 | ±34             | ±108             | ±108              | ±110 | ±116 |
| ROAD  | ±34             | ±92             | ±82  | ±16             | ±99              | ±100              | ±101 | ±97  |
| OTRA  | ±48             | ±103            | ±125 | ±35             | ±123             | ±122              | ±122 | ±122 |
| DOM   | ±76             | ±116            | ±161 | ±46             | ±178             | ±203              | ±184 | ±220 |
| OSA   |                 |                 |      |                 |                  |                   |      |      |
| PP    | ±53             | ±48             | ±72  | ±23             | ±78              | ±77               | ±70  | ±87  |
| IND   | ±58             | ±86             | ±163 | ±45             | ±131             | ±144              | ±165 | ±243 |
| ROAD  | ±27             | ±55             | ±79  | ±15             | ±81              | ±82               | ±87  | ±81  |
| OTRA  | ±52             | ±103            | ±121 | ±35             | ±122             | ±122              | ±122 | ±122 |
| DOM   | ±243            | ±202            | ±259 | ±100            | ±311             | ±311              | ±310 | ±312 |

**Table S2.** Uncertainties [%] of emissions of NMVOC for each sector in China, India, Japan, SEA, OEA, and OSA in 1955, 1985, and 2015. Abbreviations for sectors are the same as in Table S1 except for EXT = Extraction processes, SLV = Solvent and paint use, and WST = Waste treatment. Note that uncertainties of emissions from non-combustion sources in Japan based on MOEJ (2017) were not assessed in this study. For OTRA of OEA in 1955, no emissions were estimated. See Fig. 1 for the definitions of SEA, OEA, and OSA.

|      | China | India | Japan | SEA  | OEA  | OSA  |
|------|-------|-------|-------|------|------|------|
| 1955 |       |       |       |      |      |      |
| PP   | ±164  | ±124  | ±134  | ±147 | ±159 | ±134 |
| IND  | ±147  | ±251  | ±160  | ±267 | ±242 | ±262 |
| ROAD | ±89   | ±83   | ±64   | ±125 | ±114 | ±102 |
| OTRA | ±200  | ±131  | ±117  | ±200 | -    | ±155 |
| DOM  | ±327  | ±324  | ±223  | ±326 | ±294 | ±329 |
| EXT  | ±191  | ±164  | -     | ±184 | ±216 | ±180 |
| SLV  | ±167  | ±151  | -     | ±167 | ±146 | ±155 |
| WST  | ±245  | ±245  | -     | ±245 | ±245 | ±245 |
| 1985 |       |       |       |      |      |      |
| PP   | ±103  | ±102  | ±84   | ±94  | ±105 | ±77  |
| IND  | ±109  | ±159  | ±100  | ±169 | ±121 | ±148 |
| ROAD | ±65   | ±75   | ±51   | ±100 | ±96  | ±86  |
| OTRA | ±154  | ±107  | ±129  | ±154 | ±135 | ±105 |
| DOM  | ±268  | ±269  | ±116  | ±273 | ±146 | ±275 |
| EXT  | ±130  | ±117  | -     | ±127 | ±137 | ±135 |
| SLV  | ±161  | ±173  | -     | ±177 | ±179 | ±180 |
| WST  | ±200  | ±200  | -     | ±200 | ±200 | ±200 |
| 2015 |       |       |       |      |      |      |
| PP   | ±94   | ±91   | ±97   | ±91  | ±76  | ±69  |
| IND  | ±99   | ±115  | ±81   | ±133 | ±166 | ±136 |
| ROAD | ±64   | ±84   | ±50   | ±104 | ±82  | ±88  |
| OTRA | ±111  | ±122  | ±117  | ±122 | ±122 | ±122 |
| DOM  | ±241  | ±256  | ±129  | ±259 | ±189 | ±262 |
| EXT  | ±126  | ±114  | -     | ±130 | ±141 | ±136 |
| SLV  | ±153  | ±150  | -     | ±158 | ±141 | ±146 |
| WST  | ±173  | ±173  | -     | ±192 | ±188 | ±200 |

**Table S3.** Uncertainties [%] of emissions of NH<sub>3</sub> for each sector in China, India, Japan, SEA, OEA, and OSA in 1955, 1985, and 2015. Abbreviations for sectors are the same as in Table S1 except for MISC = Human (perspiration and respiration) and latrines. Note that uncertainties of emissions from agricultural sources based on REASv1.1 (Yamaji et al., 2004; Yan et al., 2003) and REASv2.1 (Kurokawa et al., 2013; JPEC 2012a, b, c; 2014) were not assessed in this study. For OTRA of OEA in 1955, no emissions were estimated. See Fig. 1 for the definitions of SEA, OEA, and OSA.

|      | China | India | Japan | SEA  | OEA  | OSA  |
|------|-------|-------|-------|------|------|------|
| 1955 |       |       |       |      |      |      |
| PP   | ±279  | ±236  | ±264  | ±238 | ±279 | ±263 |
| IND  | ±129  | ±377  | ±243  | ±384 | ±325 | ±383 |
| ROAD | ±151  | ±187  | ±161  | ±215 | ±157 | ±193 |
| OTRA | ±260  | ±249  | ±250  | ±260 | -    | ±228 |
| DOM  | ±384  | ±382  | ±360  | ±375 | ±380 | ±383 |
| MISC | ±161  | ±161  | ±140  | ±161 | ±161 | ±161 |
| 1985 |       |       |       |      |      |      |
| PP   | ±217  | ±202  | ±300  | ±314 | ±206 | ±212 |
| IND  | ±77   | ±199  | ±307  | ±241 | ±129 | ±151 |
| ROAD | ±126  | ±148  | ±144  | ±151 | ±142 | ±159 |
| OTRA | ±213  | ±185  | ±207  | ±213 | ±213 | ±205 |
| DOM  | ±325  | ±324  | ±141  | ±318 | ±316 | ±326 |
| MISC | ±148  | ±161  | ±122  | ±161 | ±161 | ±161 |
| 2015 |       |       |       |      |      |      |
| PP   | ±192  | ±297  | ±290  | ±280 | ±158 | ±218 |
| IND  | ±79   | ±157  | ±263  | ±185 | ±114 | ±138 |
| ROAD | ±145  | ±145  | ±162  | ±176 | ±142 | ±174 |
| OTRA | ±193  | ±200  | ±193  | ±200 | ±200 | ±200 |
| DOM  | ±311  | ±310  | ±124  | ±305 | ±308 | ±312 |
| MISC | ±137  | ±137  | ±108  | ±137 | ±137 | ±137 |

## References

- JPEC (Japan Petroleum Energy Center): Emission inventory of road transport in Japan, JPEC Technical Report (in Japanese),  
40 JPEC- 2011AQ-02-06, 136 pp., 2012a.
- JPEC: Emission inventory of sources other than road transport in Japan, JPEC Technical Report (in Japanese), JPEC-  
2011AQ-02-07, 288 pp., 2012b.
- JPEC: Speciation profiles of VOC, PM, and NO<sub>x</sub> emissions for atmospheric simulations of PM<sub>2.5</sub>, JPEC Technical Report  
(in Japanese), JPEC-2011AQ-02-08, 69 pp., 2012c.
- 45 JPEC: Emission inventory of PM<sub>2.5</sub> and profiles of emission sources, Report of Ministry of Environment of Japan, 2014.
- Kurokawa, J., Ohara, T., Morikawa, T., Hanayama, S., Janssens-Maenhout, G., Fukui, T., Kawashima, K., and Akimoto, H.:  
Emissions of air pollutants and greenhouse gases over Asian regions during 2000–2008: Regional Emission inventory  
in ASia (REAS) version 2, *Atmos. Chem. Phys.*, 13, 11019–11058, <https://doi.org/10.5194/acp-13-11019-2013>, 2013.
- MOEJ (Ministry of Environment of Japan): Report on Volatile Organic Compound (VOC) Emission Inventory Compiled (in  
50 Japanese), available at: <http://www.env.go.jp/air/osen/voc/inventory.html> (last access: 9 August 2020), 2017.
- Yamaji, K., Ohara, T., and Akimoto, H.: Regional-specific emission inventory for NH<sub>3</sub>, N<sub>2</sub>O, and CH<sub>4</sub> via animal farming in  
South, Southeast, and East Asia, *Atmos. Environ.*, 38, 7111–7121, <https://doi.org/10.1016/j.atmosenv.2004.06.045>,  
2004.
- Yan, X., Akimoto, H., and Ohara, T.: Estimation of nitrous oxide, nitric oxide, and ammonia emissions from croplands in  
55 East, Southeast, and South Asia, *Global Change Biol.*, 9, 1080–1096, <https://doi.org/10.1046/j.1365-2486.2003.00649.x>,  
2003.
