# Supplementary material for: Long-term historical trends in air pollutant emissions in Asia: Regional Emission inventory in ASia (REAS) version 3
Source: Copernicus journal article supplement (doi:10.5194/acp-20-12761-2020), 2020-11-04
Supplement: Supplementary file 1 [file acp-20-12761-2020-supplement.zip › Kurokawa_and_Ohara_Supplement/Kurokawa_and_Ohara_Supplement_Title_Page.pdf]

*Supplement of*

# **Long-term historical trends in air pollutant emissions in Asia: Regional Emission inventory in ASia (REAS) version 3**

**Junichi Kurokawa and Toshimasa Ohara**

5 *Correspondence to:* Junichi Kurokawa (kurokawa@acap.asia)

- Supplementary information and data related to methodology of REASv3
- Supplementary figures
- Supplementary tables
- Differences between REASv3.2 and REASv3.1

10
